# Supplementary material for: Enantioselective [3+2] cycloaddition of azomethine ylides and aldehydes via Ni/bis(oxazoline)-catalyzed ring opening of N-tosylaziridines through a chirality transfer approach
Source: Royal Society of Chemistry journal article supplement (doi:10.1039/c7cc02906c), 2017-01-01

## Supporting information

# Enantioselective [3+2] Cycloaddition of Azomethine Ylides and Aldehydes via Ni/Bis(oxazoline)-Catalyzed Ring Opening of *N*-Tosylaziridines through Chirality Transfer Approach

*Xingxing Wu, Wei Zhou, Hai-Hong Wu,\* and Junliang Zhang\**

*e-mail : jlzhang@chem.ecnu.edu.cn*

## Contents

|                                                                                                                                                  |     |
|--------------------------------------------------------------------------------------------------------------------------------------------------|-----|
| <b>General information</b> .....                                                                                                                 | S2  |
| <b>Figure 1</b> .....                                                                                                                            | S2  |
| <b>Table S1</b> .....                                                                                                                            | S3  |
| <b>Table S2</b> .....                                                                                                                            | S4  |
| <b>Table S3</b> .....                                                                                                                            | S4  |
| <b>Synthesis of aziridines 1f-1o</b> .....                                                                                                       | S5  |
| <b>Typical procedure for preparation of racemic 1,3-oxazolidines</b> .....                                                                       | S8  |
| <b>Typical procedure for Ni(ClO<sub>4</sub>)<sub>2</sub>·6H<sub>2</sub>O/Bn-Box catalyzed cycloaddition of aziridine 1 with aldehyde 2</b> ..... | S8  |
| <b>Copies of HPLC spectra of racemic / chiral products</b> .....                                                                                 | S31 |
| <b>Copies of NMR spectra of products</b> .....                                                                                                   | S55 |

## General information.

Infrared (IR) spectra were obtained using a Bruker tensor 27 infrared spectrometer.  $^1\text{H}$  NMR spectra,  $^{13}\text{C}$  NMR spectra were recorded on a Bruker 400 MHz spectrometer in chloroform- $d_3$ . All signals are reported in ppm with the internal TMS signal at 0 ppm as a standard. The data is being reported as (s = singlet, d = doublet, t = triplet, hep = heptet, m = multiplet or unresolved, br = broad signal, coupling constant(s) in Hz, integration). Enantiomer ratios were determined using chiral HPLC analysis by comparison with authentic racemic materials. All reactions were carried out under an atmosphere of nitrogen in flame-dried glassware with magnetic stirrer bar.  $\text{ClCH}_2\text{CH}_2\text{Cl}$  (DCE),  $\text{CH}_2\text{Cl}_2$  (DCM) were freshly distilled from  $\text{CaH}_2$ ; THF and toluene were freshly distilled from sodium metal prior to use. Solid aldehydes were used directly. All other liquid aldehydes were freshly distilled prior to use. Aziridine were prepared according to the literature (X. Wu, L. Li and J. Zhang, *Adv. Synth. Catal.*, 2012, **354**, 3485.).

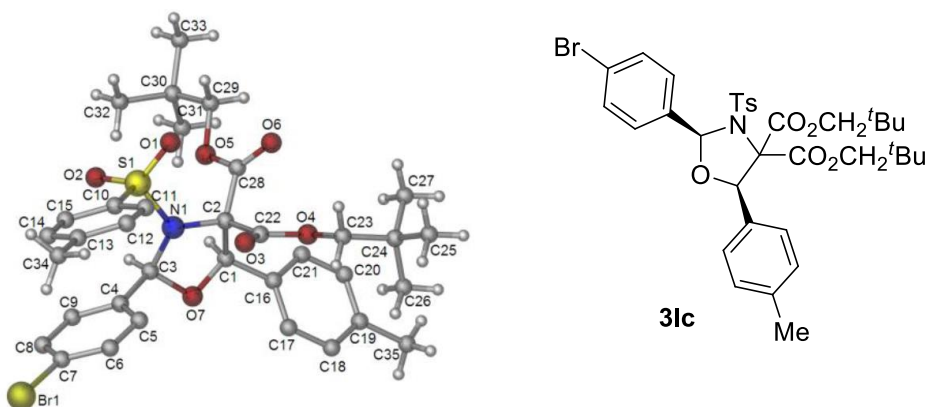

**Figure 1.** ORTEP representation of **3lc** (CCDC 895347).

**Table S1. Screening conditions of reaction between 1a and 2a using Pybox or Box as the chiral ligand.<sup>a</sup>**

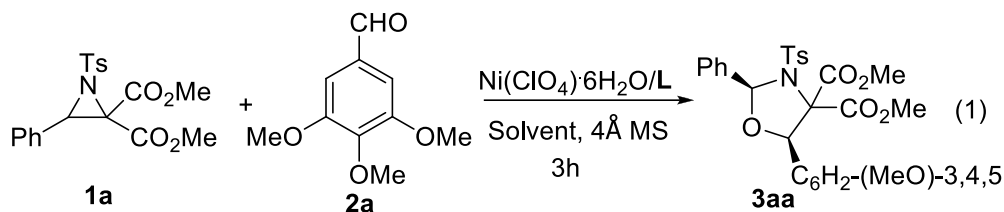

| Entry | Lewis acid                                            | L*        | Solvent | Time (h) | Yield (%) <sup>b</sup> | Ee (%) <sup>c</sup> |
|-------|-------------------------------------------------------|-----------|---------|----------|------------------------|---------------------|
| 1     | Ni(ClO <sub>4</sub> ) <sub>2</sub> ·6H <sub>2</sub> O | <b>L6</b> | Toluene | 3        | 83                     | 11                  |
| 2     | Ni(ClO <sub>4</sub> ) <sub>2</sub> ·6H <sub>2</sub> O | <b>L7</b> | Toluene | 3        | 71                     | 3                   |
| 3     | Ni(ClO <sub>4</sub> ) <sub>2</sub> ·6H <sub>2</sub> O | <b>L8</b> | Toluene | 3        | 81                     | racemic             |
| 4     | Ni(ClO <sub>4</sub> ) <sub>2</sub> ·6H <sub>2</sub> O | <b>L9</b> | Toluene | 3        | 83                     | 42                  |
| 5     | Ni(ClO <sub>4</sub> ) <sub>2</sub> ·6H <sub>2</sub> O | <b>L1</b> | Toluene | 3        | 81                     | 88                  |
| 6     | Ni(ClO <sub>4</sub> ) <sub>2</sub> ·6H <sub>2</sub> O | <b>L4</b> | Toluene | 3        | 79                     | 70                  |

<sup>a</sup> Reaction conditions: **1a** (0.2 mmol), **2a** (1.5 equiv), Ni(ClO<sub>4</sub>)<sub>2</sub>/L (1/1.2, 5 mol%), and 100 mg of activated 4 Å MS in 2 ml of toluene at room temperature. <sup>b</sup> NMR yield of the crude product (using CH<sub>2</sub>Br<sub>2</sub> as internal standard). <sup>c</sup> Determined by chiral-phase HPLC analysis.

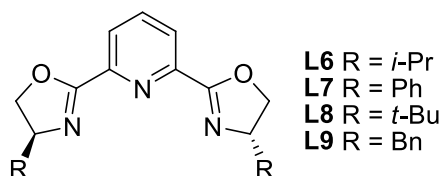

**Table S2. Screening reaction conditions using L1 as the chiral ligand.<sup>a</sup>**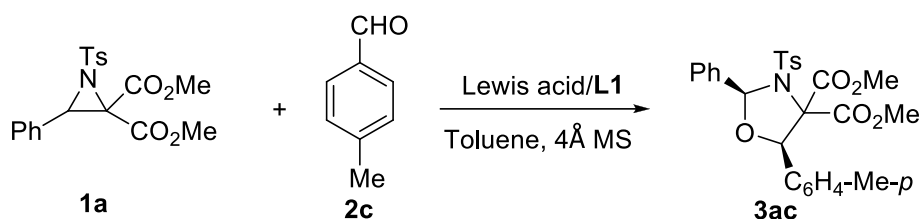

| Entry | Lewis acid                                            | Temp/Additive<br>(equiv)       | Solvent | Time (h) | Yield (%) | Ee (%) <sup>c</sup> |
|-------|-------------------------------------------------------|--------------------------------|---------|----------|-----------|---------------------|
| 1     | Ni(ClO <sub>4</sub> ) <sub>2</sub> ·6H <sub>2</sub> O | rt/-                           | DCM     | 3        | 68        | 49                  |
| 2     | Ni(ClO <sub>4</sub> ) <sub>2</sub> ·6H <sub>2</sub> O | rt/-                           | DCE     | 3        | 67        | 57                  |
| 3     | Ni(ClO <sub>4</sub> ) <sub>2</sub> ·6H <sub>2</sub> O | rt/-                           | DME     | 24       | trace     | n.d.                |
| 4     | Ni(ClO <sub>4</sub> ) <sub>2</sub> ·6H <sub>2</sub> O | -15 °C/-                       | toluene | 12       | 73        | 53                  |
| 5     | NiI <sub>2</sub>                                      | rt/-                           | toluene | 24       | n.r.      | n.d.                |
| 6     | Ni(OTf) <sub>2</sub>                                  | rt/-                           | toluene | 24       | trace     | n.d.                |
| 7     | Ni(BF <sub>4</sub> ) <sub>2</sub>                     | rt/-                           | toluene | 4        | 71        | 36                  |
| 8     | Ni(ClO <sub>4</sub> ) <sub>2</sub> ·6H <sub>2</sub> O | rt/LiI (0.05)                  | toluene | 4        | Trace     | 42                  |
| 9     | Ni(ClO <sub>4</sub> ) <sub>2</sub> ·6H <sub>2</sub> O | rt/P(O)Ph <sub>3</sub> (0.20)  | toluene | 3        | 55        | 68                  |
| 10    | Ni(ClO <sub>4</sub> ) <sub>2</sub> ·6H <sub>2</sub> O | rt/Ca(ClO) <sub>2</sub> (0.05) | toluene | 3        | 68        | 55                  |
| 11    | Ni(ClO <sub>4</sub> ) <sub>2</sub> ·6H <sub>2</sub> O | rt/PhCOOH (0.20)               | toluene | 3        | 71        | 67                  |

<sup>a</sup> Reaction conditions: **1a** (0.2 mmol), **2c** (1.5 equiv), Lewis acid/**L1** (1/1.2, 5 mol%), and 100 mg of activated 4 Å MS in 2 ml of toluene at room temperature. <sup>b</sup> Yield of isolated product. <sup>c</sup> Determined by chiral-phase HPLC analysis. n.d. = not determined.

**Table S3. Screening reaction conditions using Pybox as the chiral ligand.<sup>a</sup>**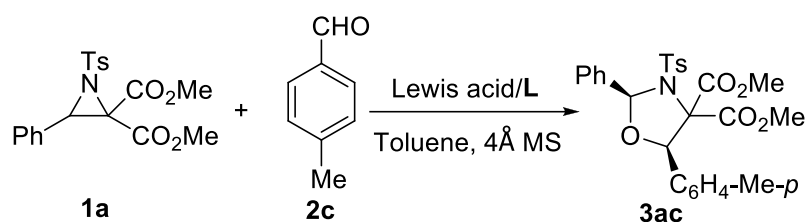

| Entry | Lewis acid                                            | L*        | Solvent | Time (h) | Yield (%) <sup>b</sup> | Ee (%) <sup>c</sup> |
|-------|-------------------------------------------------------|-----------|---------|----------|------------------------|---------------------|
| 1     | Ni(ClO <sub>4</sub> ) <sub>2</sub> ·6H <sub>2</sub> O | <b>L6</b> | Toluene | 48       | 12                     | 39                  |
| 2     | Ni(ClO <sub>4</sub> ) <sub>2</sub> ·6H <sub>2</sub> O | <b>L7</b> | Toluene | 48       | trace                  | n.d.                |
| 3     | Ni(ClO <sub>4</sub> ) <sub>2</sub> ·6H <sub>2</sub> O | <b>L8</b> | Toluene | 48       | trace                  | n.d.                |
| 4     | Ni(ClO <sub>4</sub> ) <sub>2</sub> ·6H <sub>2</sub> O | <b>L9</b> | Toluene | 48       | 19                     | 23                  |

<sup>a</sup> Reaction conditions: **1a** (0.2 mmol), **2c** (1.5 equiv), Ni(ClO<sub>4</sub>)<sub>2</sub>/**L** (1/1.2, 5 mol%), and 100 mg of activated 4 Å MS in 2 ml of toluene at room temperature. <sup>b</sup> NMR yield of the crude product (using CH<sub>2</sub>Br<sub>2</sub> as internal standard). <sup>c</sup> Determined by chiral-phase HPLC analysis. n.d. = not determined.

## Synthesis of aziridines 1f-1o.

Aziridines were prepared according to the literature (X. Wu, L. Li and J. Zhang, *Adv. Synth. Catal.*, 2012, **354**, 3485).

### 1. Dineopentyl 3-phenyl-1-tosylaziridine-2,2-dicarboxylate (1f).

White solid, mp = 96 – 98 °C, <sup>1</sup>H NMR (400 MHz, CDCl<sub>3</sub>): δ = 7.97 (d, *J* = 8.4 Hz, 2 H); 7.34 (d, *J* = 8.4 Hz, 2 H); 7.18 – 7.26 (m, 5 H); 4.92 (s, 1 H); 4.05 (d, *J* = 10.4 Hz, 1 H); 4.00 (d, *J* = 10.4 Hz, 1 H); 3.64 (d, *J* = 10.4 Hz, 1 H); 3.44 (d, *J* = 10.4 Hz, 1 H); 2.45 (s, 3 H); 0.99 (s, 9 H); 0.66 (s, 9 H); <sup>13</sup>C NMR (100 MHz, CDCl<sub>3</sub>): δ = 163.2, 162.6, 144.6, 136.7, 131.2, 129.7, 128.9, 128.5, 127.7, 126.9, 76.5, 75.3, 57.8, 49.7, 31.4, 30.9, 26.4, 25.9, 21.6 ppm. IR (neat)  $\nu/\text{cm}^{-1}$  2959, 2917, 2869, 1739, 1724, 1598, 1476, 1462, 1402, 1375, 1343, 1311, 1298, 1279, 1266, 1166, 1126, 1092, 1045, 981, 968, 935. HRMS (ESI): C<sub>27</sub>H<sub>35</sub>NNaO<sub>6</sub>S [M+Na]<sup>+</sup> calcd: 524.2077, found: 524.2139.

### 2. Dineopentyl 3-(4-isopropylphenyl)-1-tosylaziridine-2,2-dicarboxylate (1g).

White solid, mp = 80 – 83 °C, <sup>1</sup>H NMR (400 MHz, CDCl<sub>3</sub>): δ = 7.96 (d, *J* = 8.4 Hz, 2 H); 7.34 (d, *J* = 8.4 Hz, 2 H); 7.15 (d, *J* = 8.0 Hz, 2 H); 7.10 (d, *J* = 8.0 Hz, 2 H); 4.90 (s, 1 H); 4.05 (d, *J* = 10.4 Hz, 1 H); 3.99 (d, *J* = 10.4 Hz, 1 H); 3.70 (d, *J* = 10.4 Hz, 1 H); 3.43 (d, *J* = 10.4 Hz, 1 H); 2.83 (hep, *J* = 6.8 Hz, 1 H); 2.44 (s, 3 H); 1.17 (d, *J* = 6.8 Hz, 6 H); 0.99 (s, 9 H); 0.62 (s, 9 H); <sup>13</sup>C NMR (100 MHz, CDCl<sub>3</sub>): δ = 163.3, 162.8, 149.7, 144.5, 136.8, 129.6, 128.6, 127.7, 126.8, 126.6, 76.4, 75.3, 57.8, 49.9, 33.9, 31.4, 30.9, 26.3, 25.9, 23.8, 21.7 ppm. IR (neat)  $\nu/\text{cm}^{-1}$  2599, 2905, 2871, 1756, 1703, 1608, 1594, 1479, 1466, 1429, 1401, 1369, 1341, 1293, 1272, 1247, 1224, 1194, 1183, 1164, 1116, 1091, 1030, 1018, 998, 936, 918. HRMS (ESI): C<sub>30</sub>H<sub>41</sub>NNaO<sub>6</sub>S [M+Na]<sup>+</sup> calcd: 566.2547, found: 566.2573.

### 3. Dineopentyl 3-(*p*-tolyl)-1-tosylaziridine-2,2-dicarboxylate (1h).

White solid, mp = 89 – 92 °C, <sup>1</sup>H NMR (400 MHz, CDCl<sub>3</sub>): δ = 7.95 (d, *J* = 8.4 Hz, 2 H), 7.33 (d, *J* = 8.4 Hz, 2 H), 7.12 (d, *J* = 8.0 Hz, 2 H), 7.05 (d, *J* = 8.0 Hz, 2 H), 4.87 (s, 1 H), 4.03 (d, *J* = 10.4 Hz, 1 H), 3.99 (d, *J* = 10.4 Hz, 1 H), 3.65 (d, *J* = 10.4 Hz, 1 H), 3.46 (d, *J* = 10.4 Hz, 1 H), 2.44 (s, 3 H), 2.27 (s, 3 H), 0.99 (s, 9 H), 0.68 (s, 9 H); <sup>13</sup>C NMR (100 MHz, CDCl<sub>3</sub>): δ = 163.3, 162.7, 144.5, 138.7, 136.8, 129.6, 129.1, 128.2, 127.7, 126.8, 76.5, 75.3, 57.8, 49.7, 31.4, 31.0, 26.4, 25.9, 21.6, 21.1 ppm. IR (neat)  $\nu/\text{cm}^{-1}$  2977, 2954, 2868, 1738, 1724, 1686, 1597, 1519, 1478, 1402, 1377, 1365, 1342, 1311, 1297, 1279, 1266, 1168, 1121, 1092, 1043, 1022, 981, 967, 931. HRMS (ESI): C<sub>28</sub>H<sub>37</sub>NNaO<sub>6</sub>S [M+Na]<sup>+</sup> calcd: 538.2234, found: 538.2262.

#### 4. Dineopentyl 3-(*m*-tolyl)-1-tosylaziridine-2,2-dicarboxylate (1i).

White solid, mp = 101 – 102 °C, <sup>1</sup>H NMR (400 MHz, CDCl<sub>3</sub>): δ = 7.97 (d, *J* = 8.4 Hz, 2H); 7.34 (d, *J* = 8.0 Hz, 2 H); 6.96 – 7.18 (m, 4 H); 4.87 (s, 1H); 4.04 (d, *J* = 10.4 Hz, 1 H); 3.99 (d, *J* = 10.8 Hz, 1 H); 3.65 (d, *J* = 10.4 Hz, 1 H); 3.45 (d, *J* = 10.4 Hz, 1 H); 2.45 (s, 3 H), 2.26 (s, 3 H); 0.99 (s, 9 H); 0.67 (s, 9 H); <sup>13</sup>C NMR (100 MHz, CDCl<sub>3</sub>): δ = 163.3, 162.7, 144.6, 138.2, 136.6, 131.1, 129.6, 128.4, 127.8, 127.6, 123.8, 76.5, 75.3, 57.7, 49.6, 31.4, 31.0, 26.4, 25.9, 21.7, 21.2 ppm. IR (neat) v/cm<sup>-1</sup> 2955, 2349, 1759, 1742, 1560, 1520, 1367, 1342, 1312, 1293, 1255, 1234, 1190, 1162, 1125, 1068, 1010, 974, 931, 920. HRMS (ESI): C<sub>28</sub>H<sub>37</sub>NNaO<sub>6</sub>S [M+Na]<sup>+</sup> calcd: 538.2234, found: 538.2262.

#### 5. Dineopentyl 3-(4-nitrophenyl)-1-tosylaziridine-2,2-dicarboxylate (1j).

White solid, mp = 109 – 111 °C, <sup>1</sup>H NMR (400 MHz, CDCl<sub>3</sub>): δ = 8.14 (d, *J* = 8.4 Hz, 2 H); 7.96 (d, *J* = 8.4 Hz, 2 H); 7.44 (d, *J* = 8.4 Hz, 2 H); 7.37 (d, *J* = 8.4 Hz, 2 H); 4.94 (s, 1 H); 4.06 (d, *J* = 10.4 Hz, 1 H); 4.01 (d, *J* = 10.4 Hz, 1 H); 3.64 (d, *J* = 10.4 Hz, 1 H); 3.48 (d, *J* = 10.4 Hz, 1 H); 2.47 (s, 3 H); 1.00 (s, 9 H); 0.69 (s, 9 H); <sup>13</sup>C NMR (100 MHz, CDCl<sub>3</sub>): δ = 162.6, 162.1, 148.3, 145.2, 138.4, 136.0, 129.9, 128.1, 127.8, 123.7, 76.9, 75.7, 57.9, 48.3, 31.4, 31.0, 26.3, 25.9, 21.7 ppm. IR (neat) v/cm<sup>-1</sup> 2960, 2886, 2871, 2823, 2361, 2341, 1745, 1608, 1535, 1477, 1451, 1402, 1369, 1357, 1313, 1271, 1252, 1234, 1192, 1171, 1119, 1073, 1034, 1013, 991, 962, 941, 930. HRMS (ESI): C<sub>27</sub>H<sub>34</sub>N<sub>2</sub>NaO<sub>8</sub>S [M+Na]<sup>+</sup> calcd: 569.1907, found: 569.1928.

#### 6. Dineopentyl 3-(4-chlorophenyl)-1-tosylaziridine-2,2-dicarboxylate (1k).

White solid, mp = 121 – 124 °C, <sup>1</sup>H NMR (400 MHz, CDCl<sub>3</sub>): δ = 7.95 (d, *J* = 8.4 Hz, 2 H); 7.35 (d, *J* = 8.4 Hz, 2 H); 7.24 (d, *J* = 8.4 Hz, 2 H); 7.18 (d, *J* = 8.4 Hz, 2 H); 4.86 (s, 1 H); 4.04 (d, *J* = 10.4 Hz, 1 H); 3.99 (d, *J* = 10.4 Hz, 1 H); 3.66 (d, *J* = 10.4 Hz, 1 H); 3.47 (d, *J* = 10.4 Hz, 1 H); 2.45 (s, 3 H); 0.99 (s, 9 H); 0.69 (s, 9 H); <sup>13</sup>C NMR (100 MHz, CDCl<sub>3</sub>): δ = 163.0, 162.4, 144.9, 136.3, 134.9, 129.7, 128.7, 128.3, 127.7, 76.6, 75.5, 57.7, 48.8, 31.4, 31.0, 26.3, 25.9, 21.7 ppm. IR (neat) v/cm<sup>-1</sup> 2954, 2908, 2870, 1740, 1726, 1658, 1597, 1494, 1478, 1402, 1377, 1365, 1323, 1307, 1288, 1168, 1120, 1091, 1042, 1017, 981, 966, 951. HRMS (ESI): C<sub>27</sub>H<sub>34</sub>ClNNaO<sub>6</sub>S [M+Na]<sup>+</sup> calcd: 558.1688, found: 558.1725.

#### 7. Dineopentyl 3-(4-bromophenyl)-1-tosylaziridine-2,2-dicarboxylate (1l).

White solid, mp = 120 – 123 °C, <sup>1</sup>H NMR (400 MHz, CDCl<sub>3</sub>): δ = 7.94 (d, *J* = 8.4 Hz, 2 H); 7.39 (d, *J* = 8.4 Hz, 2 H); 7.35 (d, *J* = 8.0 Hz, 2 H); 7.12 (d, *J* = 8.0 Hz, 2 H);

4.84 (s, 1 H); 4.04 (d,  $J = 10.4$  Hz, 1 H); 3.99 (d,  $J = 10.4$  Hz, 1 H); 3.67 (d,  $J = 10.4$  Hz, 1 H); 3.47 (d,  $J = 10.4$  Hz, 1 H); 2.45 (s, 3 H); 0.99 (s, 9 H); 0.69 (s, 9 H);  $^{13}\text{C}$  NMR (100 MHz,  $\text{CDCl}_3$ ):  $\delta = 163.0, 162.4, 144.9, 136.4, 131.7, 130.3, 129.7, 128.6, 127.7, 123.1, 76.6, 75.5, 57.7, 48.9, 31.4, 31.0, 26.3, 25.9, 21.7$  ppm. IR (neat)  $\text{v}/\text{cm}^{-1}$  2955, 2869, 1740, 1725, 1591, 1574, 1489, 1479, 1467, 1377, 1366, 1341, 1323, 1306, 1288, 1264, 1167, 1121, 1091, 1071, 1043, 1013, 980, 931. HRMS (ESI):  $\text{C}_{27}\text{H}_{34}\text{BrNNaO}_6\text{S}$   $[\text{M}+\text{Na}]^+$  calcd: 602.1182, found: 602.1184.

#### 8. Dineopentyl 3-(3-bromophenyl)-1-tosylaziridine-2,2-dicarboxylate (1m)

White solid, mp = 85 – 88 °C,  $^1\text{H}$  NMR (400 MHz,  $\text{CDCl}_3$ ):  $\delta = 7.96$  (d,  $J = 8.0$  Hz, 2 H); 7.32 – 7.44 (m, 4 H); 7.08 – 7.22 (m, 2 H); 4.84 (s, 1 H); 4.05 (d,  $J = 10.4$  Hz, 1 H); 3.99 (d,  $J = 10.4$  Hz, 1 H); 3.68 (d,  $J = 10.4$  Hz, 1 H); 3.47 (d,  $J = 10.4$  Hz, 1 H); 2.46 (s, 3 H); 0.99 (s, 9 H); 0.70 (s, 9 H);  $^{13}\text{C}$  NMR (100 MHz,  $\text{CDCl}_3$ ):  $\delta = 162.9, 162.4, 144.9, 136.3, 133.6, 132.1, 130.1, 129.9, 129.8, 127.8, 125.7, 122.6, 75.5, 57.8, 48.5, 31.4, 31.0, 26.4, 26.0, 21.7$  ppm. IR (neat)  $\text{v}/\text{cm}^{-1}$  2961, 2872, 2363, 2332, 1744, 1598, 1570, 1477, 1370, 1345, 1323, 1275, 1253, 1228, 1194, 1166, 1123, 1091, 1040, 994, 927. HRMS (ESI):  $\text{C}_{27}\text{H}_{34}\text{BrNNaO}_6\text{S}$   $[\text{M}+\text{Na}]^+$  calcd: 602.1182, found: 602.1184.

#### 9. Dineopentyl 3-(naphthalen-2-yl)-1-tosylaziridine-2,2-dicarboxylate (1n).

White solid, mp = 135 – 137 °C,  $^1\text{H}$  NMR (400 MHz,  $\text{CDCl}_3$ ):  $\delta = 8.00$  (d,  $J = 8.4$  Hz, 2 H); 7.68 – 7.84 (m, 4 H); 7.42 – 7.54 (m, 2 H); 7.29 – 7.42 (m, 3 H); 5.06 (s, 1 H); 4.07 (d,  $J = 10.4$  Hz, 1 H); 4.02 (d,  $J = 10.4$  Hz, 1 H); 3.57 (d,  $J = 10.4$  Hz, 1 H); 3.41 (d,  $J = 10.4$  Hz, 1 H); 2.45 (s, 3 H); 1.01 (s, 9 H); 0.60 (s, 9 H);  $^{13}\text{C}$  NMR (100 MHz,  $\text{CDCl}_3$ ):  $\delta = 163.2, 162.7, 144.7, 136.6, 133.4, 132.9, 129.7, 128.7, 128.4, 128.0, 127.8, 127.7, 126.53, 126.49, 126.4, 124.0, 76.6, 75.4, 57.9, 49.8, 31.4, 30.9, 26.4, 25.9, 21.7$  ppm. IR (neat)  $\text{v}/\text{cm}^{-1}$  2973, 2887, 1756, 1733, 1697, 1597, 1478, 1405, 1369, 1332, 1314, 1292, 1276, 1227, 1168, 1119, 1089, 1051, 1035, 989, 937, 928, 907. HRMS (ESI):  $\text{C}_{31}\text{H}_{37}\text{NNaO}_6\text{S}$   $[\text{M}+\text{Na}]^+$  calcd: 574.2213, found: 574.2234.

#### 10. dineopentyl 1-((4-nitrophenyl)sulfonyl)-3-phenylaziridine-2,2-dicarboxylate (1o).

White solid, mp = 93 – 94 °C,  $^1\text{H}$  NMR (400 MHz,  $\text{CDCl}_3$ ):  $\delta = 8.41$  (d,  $J = 8.8$  Hz, 2 H); 8.30 (d,  $J = 8.4$  Hz, 2 H); 7.18 – 7.34 (m, 5 H); 5.02 (s, 1 H); 4.05 (s, 2 H); 3.65 (d,  $J = 10.4$  Hz, 1 H); 3.49 (d,  $J = 10.4$  Hz, 1 H); 1.00 (s, 9 H); 0.64 (s, 9 H);  $^{13}\text{C}$  NMR (100 MHz,  $\text{CDCl}_3$ ):  $\delta = 163.0, 162.2, 150.6, 145.5, 130.5, 129.3, 128.9, 128.7, 126.7, 124.4, 76.9, 75.7, 58.3, 50.7, 31.4, 30.9, 26.3, 25.9$  ppm. IR (neat)  $\text{v}/\text{cm}^{-1}$  2961,

2887, 2871, 2361, 2341, 1745, 1608, 1535, 1477, 1451, 1402, 1369, 1357, 1313, 1271, 1252, 1234, 1192, 1171, 1119, 1089, 1034, 1013, 991, 962, 930. HRMS (ESI):  $C_{26}H_{32}N_2NaO_8S$   $[M+Na]^+$  calcd: 555.1778, found: 555.1772.

### Typical procedure for preparation of racemic **1**, **3-oxazolidines**.

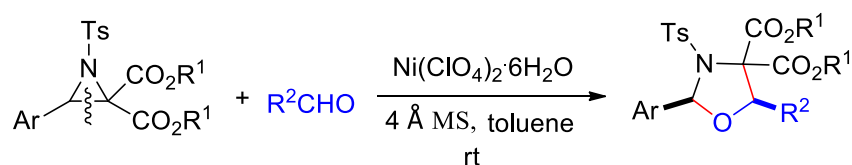

In an inert atmosphere, a flame-dried vial was charged with a magnetic stirrer bar, 100 mg of activated 4Å molecular sieves (M.S.),  $Ni(ClO_4)_2 \cdot 6H_2O$  (2.74 mg, 5 mol %), aldehyde (**2**) (0.225 mmol, 1.5 equiv), and 2 mL of toluene. The mixture was allowed to be stirred at room temperature for 15 minutes, then aziridine (**1**) (0.15 mmol, 1.0 equiv) was added. The reaction mixture was continued to be stirred until the reaction was completed (monitored by TLC). The mixture was then passed over a small plug of silica gel eluted with  $CH_2Cl_2$ . After evaporation under reduced pressure, the residue was purified by flash chromatography to afford the desired product.

### Typical procedure for $Ni(ClO_4)_2 \cdot 6H_2O$ /Bn-Box catalyzed cycloaddition of aziridine **1** with aldehyde **2**.

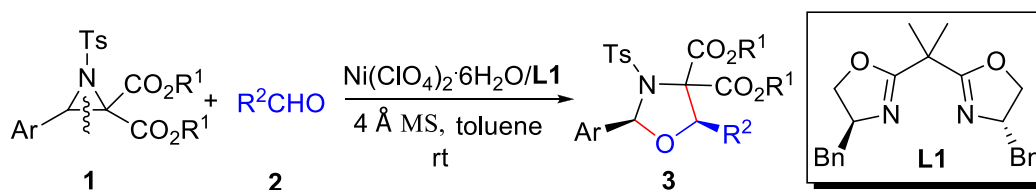

In an inert atmosphere, a flame-dried vial was charged with a magnetic stirrer bar, 150 mg of activated 4Å molecular sieves (M.S.),  $Ni(ClO_4)_2 \cdot 6H_2O$  (5.48 mg, 5 mol%), Bn-Box (6.52 mg, 6 mol%) and 3 mL of toluene. The mixture was allowed to be stirred for 3 h at room temperature. Then, aldehyde **2** (0.45 mmol, 1.5 equiv) was added, followed by aziridine **1** (0.25 mmol, 1.0 equiv). The mixture was continued to be stirred at room temperature until the complete consumption of the aziridine



(determined by TLC analysis). The reaction mixture was then passed over a small plug of silica gel eluted with CH<sub>2</sub>Cl<sub>2</sub>. After evaporation under reduced pressure, the residue was purified by flash chromatography (eluent, PE : EA = 10:1) to afford the product **3** and enantiomeric excess was determined by chiral HPLC. (Note: For some cases, it was not possible to separate the desired products and the starting aromatic aldehydes using flash chromatography, as they appeared as single spots when isolated by thin layer chromatography. Thus, the aldehydes can be transformed into the corresponding oximes by mixing the crude products with NH<sub>2</sub>OH·HCl (2 equiv, respected to the excess amount of the aldehyde), NaOAc (2 equiv), EtOH (2 mL), which was stirred at room temperature for 1-2 h before flash chromatography.)

**1. (2*S*,5*R*)-dineopentyl 2-phenyl-5-(*p*-tolyl)-3-tosyloxazolidine-4,4-dicarboxylate (3fc).**

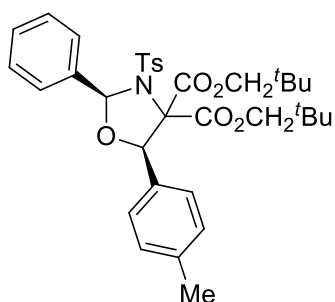

The reaction of **1f** (150.5 mg, 0.3 mmol), **2c** (54.1 mg, 0.45 mmol) in the presence of 5 mol % Ni(ClO<sub>4</sub>)<sub>2</sub>·6H<sub>2</sub>O (5.48 mg, 0.015 mmol), Bn-Box ligand (6.52 mg, 0.018 mmol), 120 mg of activated 4Å M.S. and using toluene (3 mL) as the solvent was carried out at r.t. for 12 hours to afford **3fc** (174.0 mg) in 90% yield, white solid. m.p. 133 – 136 °C; [α]<sub>20</sub><sup>D</sup> = -57.4 (*c* = 1.0, CHCl<sub>3</sub>); ee = 93% (chiral HPLC analysis: Chiralcel IC, *n*-hexane/<sup>*i*</sup>PrOH = 85/15, 0.8 mL/min, *t*<sub>minor</sub> = 7.47 min, *t*<sub>major</sub> = 9.95 min); <sup>1</sup>H NMR (400 MHz, CDCl<sub>3</sub>): δ = 7.49 (d, *J* = 7.2 Hz, 2 H); 7.18 – 7.32 (m, 3 H); 7.06 – 7.18 (m, 6 H); 6.89 (d, *J* = 8.4 Hz, 2 H); 6.17 (s, 1 H); 5.76 (s, 1 H); 4.21 (d, *J* = 10.4 Hz, 1 H); 4.08 (d, *J* = 10.4 Hz, 1 H); 3.91 (d, *J* = 10.4 Hz, 1 H); 2.91 (d, *J* = 10.4 Hz, 1 H); 2.31 (s, 3 H); 2.29 (s, 3 H); 1.16 (s, 9 H); 0.73 (s, 9 H). <sup>13</sup>C NMR (100

MHz, CDCl<sub>3</sub>):  $\delta$  = 166.9, 166.6, 142.7, 138.9, 137.6, 133.7, 131.3, 129.9, 129.0, 128.3, 128.2, 127.9, 126.5, 92.7, 87.3, 77.4, 76.2, 75.8, 31.6, 30.9, 26.8, 26.2, 21.4, 21.2 ppm. IR (neat)  $\nu/\text{cm}^{-1}$  2988, 2955, 1763, 1731, 1600, 1527, 1476, 1462, 1398, 1368, 1346, 1289, 1249, 1232, 1181, 1157, 1078, 1036, 1008, 964, 925. HRMS (ESI): C<sub>35</sub>H<sub>43</sub>NNaO<sub>7</sub>S [M+Na]<sup>+</sup> calcd: 644.2652, found: 644.2647.

### Procedure for synthesis of **3fa** in a gram level scale.

In a flame-dried nitrogen-flushed flask, a solution of Ni(ClO<sub>4</sub>)<sub>2</sub>·6H<sub>2</sub>O (58.5 mg, 2 mol%), Bn-Box ligand (63.8 mg, 2.2 mol%), and 1g 4Å M.S. in dry toluene (60 mL) was stirred for 4 h, then **2c** (1.44 g, 12 mmol) was added to this mixture, followed by aziridine **1f** (4.01g, 8 mmol). The mixture was continued to be stirred for 18 h at room temperature. After filtration to remove the 4Å M.S., the solution was concentrated under reduced pressure. Then, the residue was purified by flash chromatography (PE:EA = 10:1) to afford **3fc** (4.3 g) in 85% yield, white solid, ee = 93% (chiral HPLC analysis), and the <sup>1</sup>H NMR and <sup>13</sup>C NMR spectra were in accordance with the previous data.

### 2. (2*S*,5*R*)-dineopentyl 2-(4-isopropylphenyl)-5-(*p*-tolyl)-3-tosyloxazolidine-4,4-dicarboxylate (**3gc**).

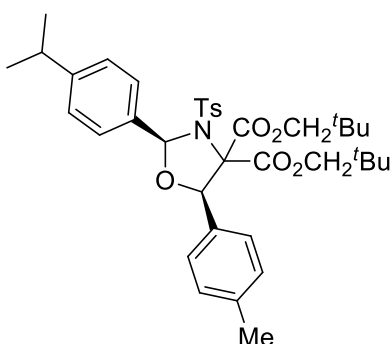

The reaction of **1g** (163.1 mg, 0.3 mmol), **2c** (54.1 mg, 0.45 mmol) in the presence of 5 mol % Ni(ClO<sub>4</sub>)<sub>2</sub>·6H<sub>2</sub>O (5.48 mg, 0.015 mmol), Bn-Box ligand (6.52 mg, 0.018 mmol), 120 mg of activated 4Å M.S. and using toluene (3 mL) as the solvent was

carried out at r.t. for 12 hours to afford **3gc** (176.5 mg) in 89% yield, white solid. m.p. 147 – 151 °C;  $[\alpha]_{20}^D = -36.8$  ( $c = 1.0$ ,  $\text{CHCl}_3$ ); ee = 89% (chiral HPLC analysis: Chiralcel IC, *n*-hexane/*i*PrOH = 85/15, 0.8 mL/min,  $t_{\text{minor}} = 7.55$  min,  $t_{\text{major}} = 11.05$  min);  $^1\text{H}$  NMR (400 MHz,  $\text{CDCl}_3$ ):  $\delta = 7.38$  (d,  $J = 8.0$  Hz, 2 H); 7.22 (d,  $J = 8.0$  Hz, 2 H); 7.16 (d,  $J = 8.4$  Hz, 2 H); 7.11 (d,  $J = 8.0$  Hz, 2 H); 6.96 (d,  $J = 8.0$  Hz, 2 H); 6.87 (d,  $J = 8.4$  Hz, 2 H); 6.15 (s, 1 H); 5.74 (s, 1 H); 4.21 (d,  $J = 10.4$  Hz, 1 H); 4.08 (d,  $J = 10.4$  Hz, 1 H); 3.92 (d,  $J = 10.4$  Hz, 1 H); 2.92 (d,  $J = 10.4$  Hz, 1 H); 2.78 – 2.90 (m, 1 H); 2.31 (s, 3 H); 2.28 (s, 3 H); 1.23 (s, 3 H); 1.21 (s, 3 H); 1.16 (s, 9 H); 0.73 (s, 9 H).  $^{13}\text{C}$  NMR (100 MHz,  $\text{CDCl}_3$ ):  $\delta = 167.0, 166.7, 150.8, 142.3, 138.8, 137.8, 131.5, 131.0, 129.8, 129.0, 128.3, 128.2, 126.5, 125.9, 92.5, 87.2, 77.5, 76.2, 75.8, 34.0, 31.6, 30.9, 26.8, 26.2, 24.1, 23.9, 21.4, 21.2$  ppm. IR (neat)  $\nu/\text{cm}^{-1}$  2960, 2870, 1758, 1739, 1614, 1598, 1516, 1497, 1467, 1434, 1393, 1368, 1341, 1298, 1236, 1217, 1203, 1154, 1089, 1078, 1059, 1041, 1020, 1007, 975, 938, 927. HRMS (ESI):  $\text{C}_{38}\text{H}_{49}\text{NNaO}_7\text{S}$   $[\text{M}+\text{Na}]^+$  calcd: 686.3122, found: 686.3127.

### 3. (2*S*,5*R*)-dineopentyl 2,5-di-(*p*-tolyl)-3-tosyloxazolidine-4,4-dicarboxylate (**3hc**).

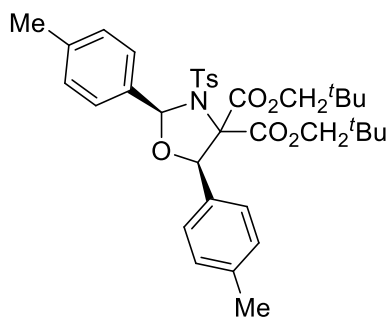

The reaction of **1h** (154.6 mg, 0.3 mmol), **2c** (54.1 mg, 0.45 mmol) in the presence of 5 mol %  $\text{Ni}(\text{ClO}_4)_2 \cdot 6\text{H}_2\text{O}$  (5.48 mg, 0.015 mmol), Bn-Box ligand (6.52 mg, 0.018 mmol), 120 mg of activated 4Å M.S. and using toluene (3 mL) as the solvent was carried out at r.t. for 18 hours to afford **3hc** (179.0 mg) in 94% yield, white solid. m.p. 146 – 149 °C;  $[\alpha]_{20}^D = -46.4$  ( $c = 1.0$ ,  $\text{CHCl}_3$ ); ee = 92% (chiral HPLC analysis: Chiralcel IC, *n*-hexane/*i*PrOH = 85/15, 0.8 mL/min,  $t_{\text{minor}} = 8.34$  min,  $t_{\text{major}} = 11.69$  min);  $^1\text{H}$  NMR (400 MHz,  $\text{CDCl}_3$ ):  $\delta = 7.35$  (d,  $J = 8.0$  Hz, 2 H); 7.22 (d,  $J = 8.0$  Hz,

2 H); 7.16 (d,  $J = 8.4$  Hz, 2 H); 7.11 (d,  $J = 8.0$  Hz, 2 H); 6.90 (t,  $J = 7.8$  Hz, 4 H); 6.12 (s, 1 H); 5.73 (s, 1 H); 4.20 (d,  $J = 10.4$  Hz, 1 H); 4.08 (d,  $J = 10.4$  Hz, 1 H); 3.90 (d,  $J = 10.4$  Hz, 1 H); 2.93 (d,  $J = 10.4$  Hz, 1 H); 2.31 (s, 6 H); 1.16 (s, 9 H); 0.73 (s, 9 H).  $^{13}\text{C}$  NMR (100 MHz,  $\text{CDCl}_3$ ):  $\delta = 167.0, 166.6, 142.5, 139.9, 138.8, 137.8, 131.4, 130.8, 129.7, 128.9, 128.4, 128.3, 128.1, 126.5, 92.5, 87.2, 77.4, 76.2, 75.8, 31.5, 30.9, 26.7, 26.2, 21.4, 21.2, 21.1$  ppm. IR (neat)  $\nu/\text{cm}^{-1}$  2956, 2869, 1761, 1736, 1617, 1598, 1516, 1476, 1464, 1368, 1345, 1309, 1289, 1247, 1227, 1212, 1154, 1089, 1036, 1006, 970, 940, 926. HRMS (ESI):  $\text{C}_{36}\text{H}_{45}\text{NNaO}_7\text{S}$   $[\text{M}+\text{Na}]^+$  calcd: 658.2809, found: 658.2810.

**4. (2*S*,5*R*)-dineopentyl 2-(*m*-tolyl)-5-(*p*-tolyl)-3-tosyloxazolidine-4,4-dicarboxylate (**3ic**).**

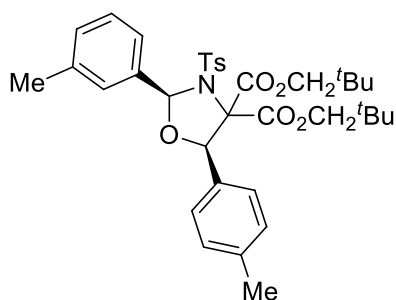

The reaction of **1i** (154.6 mg, 0.3 mmol), **2c** (54.1 mg, 0.45 mmol) in the presence of 5 mol %  $\text{Ni}(\text{ClO}_4)_2 \cdot 6\text{H}_2\text{O}$  (5.48 mg, 0.015 mmol), Bn-Box ligand (6.52 mg, 0.018 mmol), 120 mg of activated 4Å M.S. and using toluene (3 mL) as the solvent was carried out at r.t. for 12 hours to afford **3ic** (169.3 mg) in 89% yield, white solid. m.p. 158 – 161 °C;  $[\alpha]_{20}^{\text{D}} = -63.1$  ( $c = 1.0$ ,  $\text{CHCl}_3$ ); ee = 92% (chiral HPLC analysis: Chiralcel IC,  $n$ -hexane/ $i$ PrOH = 85/15, 0.8 mL/min,  $t_{\text{minor}} = 8.25$  min,  $t_{\text{major}} = 13.34$  min);  $^1\text{H}$  NMR (400 MHz,  $\text{CDCl}_3$ ):  $\delta = 7.18 - 7.30$  (m, 4 H); 7.17 (d,  $J = 8.0$  Hz, 2 H); 7.12 (d,  $J = 7.6$  Hz, 2 H); 7.05 (d,  $J = 4.4$  Hz, 2 H); 6.90 (d,  $J = 8.0$  Hz, 2 H); 6.11 (s, 1 H); 5.72 (s, 1 H); 4.21 (d,  $J = 10.4$  Hz, 1 H); 4.09 (d,  $J = 10.4$  Hz, 1 H); 3.91 (d,  $J = 10.4$  Hz, 1 H); 2.95 (d,  $J = 10.4$  Hz, 1 H); 2.31 (s, 3 H); 2.30 (s, 3 H); 2.14 (s, 3 H); 1.16 (s, 9 H); 0.73 (s, 9 H).  $^{13}\text{C}$  NMR (100 MHz,  $\text{CDCl}_3$ ):  $\delta = 167.1, 166.6, 142.5,$

138.9, 137.7, 137.6, 133.3, 131.4, 130.7, 130.3, 129.0, 128.3, 128.1, 127.7, 127.2, 126.6, 92.7, 87.2, 77.5, 76.2, 75.8, 31.6, 30.9, 26.8, 26.2, 21.3, 21.2, 21.0 ppm. IR (neat)  $\nu/\text{cm}^{-1}$  2958, 2904, 2870, 1764, 1735, 1599, 1518, 1475, 1399, 1367, 1347, 1310, 1288, 1251, 1231, 1213, 1173, 1154, 1092, 1075, 1039, 1011, 971, 939, 908. HRMS (ESI):  $\text{C}_{36}\text{H}_{45}\text{NNaO}_7\text{S}$   $[\text{M}+\text{Na}]^+$  calcd: 658.2809, found: 658.2807.

**5. (2*S*,5*R*)-dineopentyl 2-(4-nitrophenyl)-5-(*p*-tolyl)-3-tosyloxazolidine-4,4-dicarboxylate (**3jc**).**

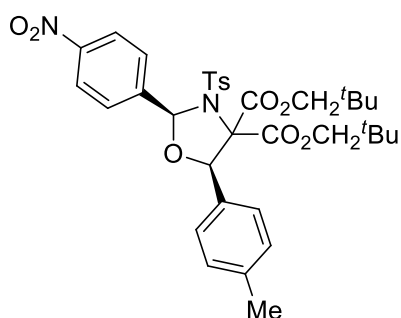

The reaction of **1j** (163.9 mg, 0.3 mmol), **2c** (54.1 mg, 0.45 mmol) in the presence of 5 mol %  $\text{Ni}(\text{ClO}_4)_2 \cdot 6\text{H}_2\text{O}$  (5.48 mg, 0.015 mmol), Bn-Box ligand (6.52 mg, 0.018 mmol), 120 mg of activated 4Å M.S. and using toluene (3 mL) as the solvent was carried out at r.t. for 72 hours to afford **3jc** (154.5 mg) in 77% yield, white solid. m.p. 182 – 185 °C;  $[\alpha]_{20}^{\text{D}} = -33.1$  ( $c = 1.0$ ,  $\text{CHCl}_3$ ); ee = 96% (chiral HPLC analysis: Chiralcel IC, *n*-hexane/*i*PrOH = 85/15, 0.8 mL/min,  $t_{\text{minor}} = 7.80$  min,  $t_{\text{major}} = 11.43$  min);  $^1\text{H}$  NMR (400 MHz,  $\text{CDCl}_3$ ):  $\delta = 7.95$  (d,  $J = 8.8$  Hz, 2 H); 7.70 (d,  $J = 8.4$  Hz, 2 H); 7.11 – 7.24 (m, 6 H); 6.92 (d,  $J = 8.0$  Hz, 2 H); 6.23 (s, 1 H); 5.80 (s, 1 H); 4.23 (d,  $J = 10.4$  Hz, 1 H); 4.08 (d,  $J = 10.4$  Hz, 1 H); 3.91 (d,  $J = 10.0$  Hz, 1 H); 2.92 (d,  $J = 10.0$  Hz, 1 H); 2.33 (s, 3 H); 2.30 (s, 3 H); 1.16 (s, 9 H); 0.72 (s, 9 H).  $^{13}\text{C}$  NMR (100 MHz,  $\text{CDCl}_3$ ):  $\delta = 166.6, 166.3, 148.8, 143.8, 140.8, 139.3, 137.3, 130.9, 130.7, 129.2, 128.5, 128.2, 126.4, 122.8, 91.1, 87.9, 77.4, 76.4, 76.1, 31.6, 30.9, 26.8, 26.1, 21.3, 21.2$  ppm. IR (neat)  $\nu/\text{cm}^{-1}$  2957, 2869, 1763, 1739, 1525, 1477, 1370, 1346, 1288, 1228, 1202, 1156, 1089, 1034, 1007, 920. HRMS (ESI):  $\text{C}_{35}\text{H}_{42}\text{N}_2\text{NaO}_9\text{S}$   $[\text{M}+\text{Na}]^+$  calcd: 689.2503, found: 689.2506.

**6. (2*S*,5*R*)-dineopentyl 2-(4-chlorophenyl)-5-(*p*-tolyl)-3-tosyloxazolidine-4,4-dicarboxylate (3kc).**

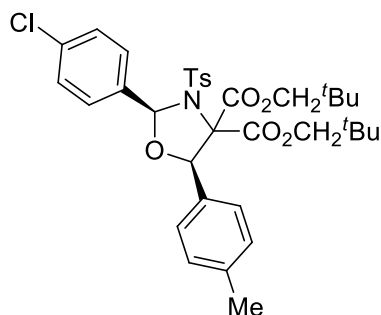

The reaction of **1k** (160.8 mg, 0.3 mmol), **2c** (54.1 mg, 0.45 mmol) in the presence of 5 mol % Ni(ClO<sub>4</sub>)<sub>2</sub>·6H<sub>2</sub>O (5.48 mg, 0.015 mmol), Bn-Box ligand (6.52 mg, 0.018 mmol), 120 mg of activated 4Å M.S. and using toluene (3 mL) as the solvent was carried out at r.t. for 12 hours to afford **3kc** (194.3 mg) in 99% yield, white solid. m.p. 168 – 171 °C; [α]<sub>20</sub><sup>D</sup> = -27.1(c = 0.5, CHCl<sub>3</sub>); ee = 94% (chiral HPLC analysis: Chiralcel OZ3, *n*-hexane/*i*PrOH = 95/5, 0.8 mL/min, *t*<sub>minor</sub> = 5.77 min, *t*<sub>major</sub> = 11.67 min); <sup>1</sup>H NMR (400 MHz, CDCl<sub>3</sub>): δ = 7.41 (d, *J* = 8.4 Hz, 2 H); 7.16 – 7.24 (m, 4 H); 7.13 (d, *J* = 8.0 Hz, 2 H); 7.07 (d, *J* = 8.4 Hz, 2 H); 6.96 (d, *J* = 8.4 Hz, 2 H); 6.12 (s, 1 H); 5.74 (s, 1 H); 4.21 (d, *J* = 10.4 Hz, 1 H); 4.07 (d, *J* = 10.4 Hz, 1 H); 3.91 (d, *J* = 10.4 Hz, 1 H); 2.91 (d, *J* = 10.4 Hz, 1 H); 2.34 (s, 3 H); 2.32 (s, 3 H); 1.16 (s, 9 H); 0.72 (s, 9 H). <sup>13</sup>C NMR (100 MHz, CDCl<sub>3</sub>): δ = 166.69, 166.65, 143.1, 139.1, 137.5, 136.1, 132.4, 131.14, 131.06, 129.1, 128.4, 128.2, 128.0, 126.5, 91.7, 87.4, 77.4, 76.3, 75.9, 31.6, 30.9, 26.8, 26.2, 21.4, 21.2 ppm. IR (neat) *v*/cm<sup>-1</sup> 2965, 2864, 1904, 1760, 1736, 1599, 1547, 1520, 1493, 1478, 1424, 1367, 1349, 1262, 1234, 1214, 1158, 1090, 1034, 1018, 963, 943. HRMS (ESI): C<sub>35</sub>H<sub>42</sub>ClNNaO<sub>7</sub>S [M+Na]<sup>+</sup> calcd: 678.2263, found: 678.2248.

**7. (2*S*,5*R*)-dineopentyl 2-(4-bromophenyl)-5-(*p*-tolyl)-3-tosyloxazolidine-4,4-dicarboxylate (3lc).**

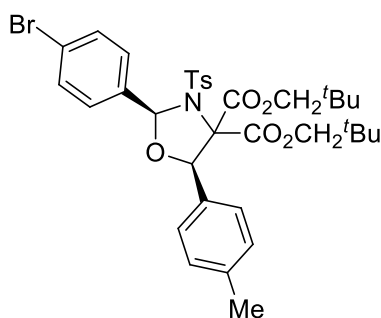

The reaction of **11** (174.2 mg, 0.3 mmol), **2c** (54.1 mg, 0.45 mmol) in the presence of 5 mol %  $\text{Ni}(\text{ClO}_4)_2 \cdot 6\text{H}_2\text{O}$  (5.48 mg, 0.015 mmol), Bn-Box ligand (6.52 mg, 0.018 mmol), 120 mg of activated 4Å M.S. and using toluene (3 mL) as the solvent was carried out at r.t. for 12 hours to afford **31c** (178.0 mg) in 85% yield, white solid. m.p. 167 – 170 °C;  $[\alpha]_{20}^{\text{D}} = -24.7$  ( $c = 0.5$ ,  $\text{CHCl}_3$ ); ee = 95% (chiral HPLC analysis: Chiralcel IC, *n*-hexane/*i*PrOH = 85/15, 0.8 mL/min,  $t_{\text{minor}} = 6.28$  min,  $t_{\text{major}} = 7.61$  min);  $^1\text{H}$  NMR (400 MHz,  $\text{CDCl}_3$ ):  $\delta = 7.34$  (d,  $J = 8.4$  Hz, 2 H); 7.16 – 7.28 (m, 6 H); 7.12 (d,  $J = 8.0$  Hz, 2 H); 6.96 (d,  $J = 8.0$  Hz, 2 H); 6.10 (s, 1 H); 5.74 (s, 1 H); 4.21 (d,  $J = 10.4$  Hz, 1 H); 4.07 (d,  $J = 10.4$  Hz, 1 H); 3.91 (d,  $J = 10.4$  Hz, 1 H); 2.92 (d,  $J = 10.4$  Hz, 1 H); 2.35 (s, 3 H); 2.32 (s, 3 H); 1.16 (s, 9 H); 0.72 (s, 9 H).  $^{13}\text{C}$  NMR (100 MHz,  $\text{CDCl}_3$ ):  $\delta = 166.7, 166.6, 143.2, 139.1, 137.5, 132.8, 131.4, 131.04, 130.96, 129.1, 128.4, 128.2, 126.4, 124.4, 91.8, 87.4, 77.4, 76.3, 75.9, 31.6, 30.9, 26.8, 26.1, 21.4, 21.1$  ppm. IR (neat)  $\nu/\text{cm}^{-1}$  2979, 2949, 2870, 1760, 1736, 1597, 1518, 1478, 1422, 1368, 1343, 1235, 1208, 1158, 1088, 1045, 1037, 1010, 972, 939, 928. HRMS (ESI):  $\text{C}_{35}\text{H}_{42}\text{BrNNaO}_7\text{S}$   $[\text{M}+\text{Na}]^+$  calcd: 722.1758, found: 722.1703.

**8. (2S,5R)-dineopentyl 2-(3-bromophenyl)-5-(*p*-tolyl)-3-tosyloxazolidine-4,4-dicarboxylate (3mc).**

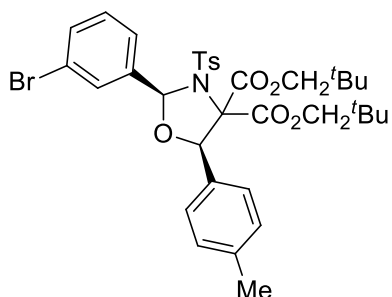

The reaction of **1m** (174.2 mg, 0.3 mmol), **2c** (54.1 mg, 0.45 mmol) in the presence of 5 mol % Ni(ClO<sub>4</sub>)<sub>2</sub>·6H<sub>2</sub>O (5.48 mg, 0.015 mmol), Bn-Box ligand (6.52 mg, 0.018 mmol), 120 mg of activated 4Å M.S. and using toluene (3 mL) as the solvent was carried out at r.t. for 38 hours to afford **3mc** (176.7 mg) in 84% yield, white solid. m.p. 167 – 171 °C; [α]<sub>20</sub><sup>D</sup> = -64.2 (*c* = 1.0, CHCl<sub>3</sub>); ee = 92% (chiral HPLC analysis: Chiralcel IC, *n*-hexane/<sup>*i*</sup>PrOH = 85/15, 0.8 mL/min, *t*<sub>minor</sub> = 6.91 min, *t*<sub>major</sub> = 9.13 min); <sup>1</sup>H NMR (400 MHz, CDCl<sub>3</sub>): δ = 7.53 (s, 1 H); 7.43 (d, *J* = 7.6 Hz, 1 H); 7.36 (d, *J* = 8.0 Hz, 1 H); 7.18 – 7.30 (m, 4 H); 7.13 (d, *J* = 8.0 Hz, 2 H); 7.05 (t, *J* = 8.0 Hz, 1 H); 6.96 (d, *J* = 8.0 Hz, 2 H); 6.08 (s, 1 H); 5.73 (s, 1 H); 4.21 (d, *J* = 10.4 Hz, 1 H); 4.08 (d, *J* = 10.4 Hz, 1 H); 3.92 (d, *J* = 10.4 Hz, 1 H); 2.95 (d, *J* = 10.4 Hz, 1 H); 2.34 (s, 3 H); 2.32 (s, 3 H); 1.16 (s, 9 H); 0.73 (s, 9 H). <sup>13</sup>C NMR (100 MHz, CDCl<sub>3</sub>): δ = 166.8, 166.5, 143.3, 139.1, 137.3, 135.8, 133.0, 132.8, 131.1, 129.3, 129.1, 128.6, 128.5, 128.1, 126.5, 122.2, 91.7, 87.4, 77.2, 76.3, 75.9, 31.6, 30.9, 26.8, 26.2, 21.5, 21.2 ppm. IR (neat) ν/cm<sup>-1</sup> 2959, 2884, 2869, 1756, 1735, 1598, 1578, 1518, 1476, 1437, 1367, 1346, 1292, 1263, 1230, 1213, 1157, 1081, 1037, 968, 939, 921, 906. HRMS (ESI): C<sub>35</sub>H<sub>42</sub>BrNNaO<sub>7</sub>S [M+Na]<sup>+</sup> calcd: 722.1758, found: 722.1766.

**9. (2*S*,5*R*)-dineopentyl 2-(naphthalen-2-yl)-5-(*p*-tolyl)-3-tosyloxazolidine-4,4-dicarboxylate (**3nc**).**

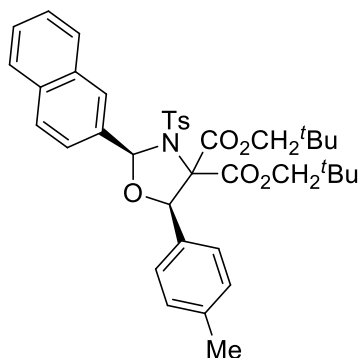

The reaction of **1n** (165.5 mg, 0.3 mmol), **2c** (54.1 mg, 0.45 mmol) in the presence of 5 mol % Ni(ClO<sub>4</sub>)<sub>2</sub>·6H<sub>2</sub>O (5.48 mg, 0.015 mmol), Bn-Box ligand (6.52 mg, 0.018



mmol), 120 mg of activated 4Å M.S. and using toluene (3 mL) as the solvent was carried out at r.t. for 12 hours to afford **3nc** (188.0 mg) in 93% yield, white solid. m.p. 202 – 205 °C;  $[\alpha]_{20}^D = -9.4$  ( $c = 0.5$ ,  $\text{CHCl}_3$ ); ee = 89% (chiral HPLC analysis: Chiralcel IC, *n*-hexane/*i*PrOH = 90/10, 0.8 mL/min,  $t_{\text{minor}} = 9.82$  min,  $t_{\text{major}} = 18.09$  min);  $^1\text{H}$  NMR (400 MHz,  $\text{CDCl}_3$ ):  $\delta = 7.96$  (s, 1 H); 7.75 (t,  $J = 7.0$  Hz, 2 H); 7.44 – 7.53 (m, 4 H); 7.27 (d,  $J = 8.0$  Hz, 2 H); 7.14 (d,  $J = 8.0$  Hz, 2 H); 7.07 (d,  $J = 8.0$  Hz, 2 H); 6.53 (d,  $J = 8.4$  Hz, 2 H); 6.31 (s, 1 H); 5.80 (s, 1 H); 4.24 (d,  $J = 10.4$  Hz, 1 H); 4.11 (d,  $J = 10.4$  Hz, 1 H); 3.95 (d,  $J = 10.4$  Hz, 1 H); 2.98 (d,  $J = 10.4$  Hz, 1 H); 2.33 (s, 3 H); 2.07 (s, 3 H); 1.19 (s, 9 H); 0.75 (s, 9 H).  $^{13}\text{C}$  NMR (100 MHz,  $\text{CDCl}_3$ ):  $\delta = 167.0, 166.8, 142.6, 139.0, 137.4, 134.3, 132.4, 131.4, 130.9, 130.2, 129.1, 128.4, 128.2, 128.0, 127.7, 127.4, 126.8, 126.6, 126.0, 125.9, 92.7, 87.4, 77.5, 76.2, 75.9, 31.6, 30.9, 26.8, 26.2, 21.18, 21.15$  ppm. IR (neat)  $\nu/\text{cm}^{-1}$  2987, 2971, 2901, 1752, 1738, 1601, 1477, 1452, 1406, 1379, 1347, 1246, 1179, 1158, 1075, 1067, 1047, 1006, 977, 963. HRMS (ESI):  $\text{C}_{39}\text{H}_{45}\text{NNaO}_7\text{S}$   $[\text{M}+\text{Na}]^+$  calcd: 694.2809, found: 694.2786.

**10. (2*S*,5*R*)-dineopentyl 3-((4-nitrophenyl)sulfonyl)-2-phenyl-5-(*p*-tolyl)oxazolidine-4,4-dicarboxylate (**3oc**).**

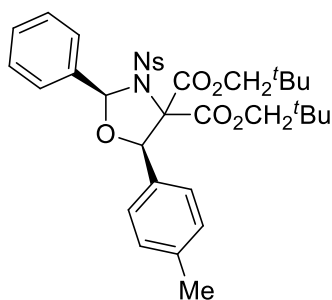

The reaction of **1o** (159.8 mg, 0.3 mmol), **2c** (54.1 mg, 0.45 mmol) in the presence of 5 mol %  $\text{Ni}(\text{ClO}_4)_2 \cdot 6\text{H}_2\text{O}$  (5.48 mg, 0.015 mmol), Bn-Box ligand (6.52 mg, 0.018 mmol), 120 mg of activated 4Å M.S. and using toluene (3 mL) as the solvent was carried out at r.t. for 60 hours to afford **3oc** (153.5 mg) in 78% yield, white solid. m.p. 188 – 190 °C;  $[\alpha]_{20}^D = -83.5$  ( $c = 1.0$ ,  $\text{CHCl}_3$ ); ee = 92% (chiral HPLC analysis: Chiralcel IC, *n*-hexane/*i*PrOH = 85/15, 0.8 mL/min,  $t_{\text{minor}} = 12.06$  min,  $t_{\text{major}} = 15.12$

min);  $^1\text{H}$  NMR (400 MHz,  $\text{CDCl}_3$ ):  $\delta$  = 7.91 (d,  $J$  = 8.4 Hz, 2 H); 7.47 (d,  $J$  = 7.6 Hz, 2 H); 7.40 (d,  $J$  = 8.8 Hz, 2 H); 7.31 (t,  $J$  = 7.4 Hz, 1 H); 7.04 – 7.25 (m, 6 H); 6.20 (s, 1 H); 5.77 (s, 1 H); 4.22 (d,  $J$  = 10.4 Hz, 1 H); 4.10 (d,  $J$  = 10.4 Hz, 1 H); 3.93 (d,  $J$  = 10.0 Hz, 1 H); 2.89 (d,  $J$  = 10.0 Hz, 1 H); 2.33 (s, 3 H); 1.18 (s, 9 H); 0.72 (s, 9 H).  $^{13}\text{C}$  NMR (100 MHz,  $\text{CDCl}_3$ ):  $\delta$  = 166.6, 166.4, 149.2, 145.9, 139.3, 133.2, 130.9, 130.5, 130.1, 129.5, 129.2, 128.1, 126.5, 122.7, 92.7, 87.5, 77.7, 76.6, 76.2, 31.6, 30.9, 26.8, 26.1, 21.2 ppm. IR (neat)  $\nu/\text{cm}^{-1}$  2957, 2901, 2867, 1757, 1735, 1607, 1526, 1478, 1464, 1399, 1359, 1314, 1270, 1236, 1217, 1161, 1089, 1075, 1051, 1013, 1001, 963, 927. HRMS (ESI):  $\text{C}_{34}\text{H}_{40}\text{N}_2\text{NaO}_9\text{S}$  [ $\text{M}+\text{Na}$ ] $^+$  calcd: 675.2347, found: 675.2336.

**11. (2*S*,5*R*)-dineopentyl 2-phenyl-3-tosyl-5-(3,4,5-trimethoxyphenyl)oxazolidine-4,4-dicarboxylate (3fa).**

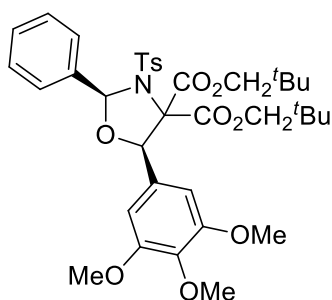

The reaction of **1f** (150.5 mg, 0.3 mmol), **2a** (88.3 mg, 0.45 mmol) in the presence of 5 mol %  $\text{Ni}(\text{ClO}_4)_2 \cdot 6\text{H}_2\text{O}$  (5.48 mg, 0.015 mmol), Bn-Box ligand (6.52 mg, 0.018 mmol), 120 mg of activated 4Å M.S. and using toluene (3 mL) as the solvent was carried out at r.t. for 12 hours to afford **3fa** (190.2 mg) in 91% yield, white solid. m.p. 135 – 138 °C;  $[\alpha]_{20}^{\text{D}}$  = -35.6 ( $c$  = 1.0,  $\text{CHCl}_3$ ); ee = 92% (chiral HPLC analysis: Chiralcel ADH,  $n$ -hexane/ $i$ PrOH = 80/20, 0.8 mL/min,  $t_{\text{minor}}$  = 6.55 min,  $t_{\text{major}}$  = 5.80 min);  $^1\text{H}$  NMR (400 MHz,  $\text{CDCl}_3$ ):  $\delta$  = 7.50 (d,  $J$  = 7.2 Hz, 2 H); 7.28 – 7.37 (m, 1 H); 7.02 – 7.23 (m, 4 H); 6.90 (d,  $J$  = 8.4 Hz, 2 H); 6.56 (s, 2 H); 6.20 (s, 1 H); 5.75 (s, 1 H); 4.25 (d,  $J$  = 10.4 Hz, 1 H); 4.07 (d,  $J$  = 10.4 Hz, 1 H); 3.97 (d,  $J$  = 10.4 Hz, 1 H); 3.81 (s, 3 H); 3.80 (s, 6 H); 2.98 (d,  $J$  = 10.0 Hz, 1 H); 2.29 (s, 3 H); 1.17 (s, 9 H); 0.76 (s, 9 H).  $^{13}\text{C}$  NMR (100 MHz,  $\text{CDCl}_3$ ):  $\delta$  = 166.8, 166.5, 153.2, 142.8, 138.3,

137.5, 133.8, 129.9, 129.8, 128.3, 128.1, 127.9, 103.4, 92.8, 87.1, 77.2, 76.3, 76.0, 60.7, 56.0, 31.6, 31.0, 26.7, 26.2, 21.4 ppm. IR (neat)  $\nu/\text{cm}^{-1}$  2958, 2869, 2841, 1760, 1736, 1587, 1499, 1462, 1421, 1398, 1367, 1347, 1325, 1236, 1158, 1104, 1093, 1046, 998, 985, 957, 939, 909. HRMS (ESI):  $\text{C}_{37}\text{H}_{47}\text{NNaO}_{10}\text{S}$   $[\text{M}+\text{Na}]^+$  calcd: 720.2813, found: 720.2836.

**12. (2*S*,5*R*)-dineopentyl 5-(4-methoxyphenyl)-2-phenyl-3-tosyloxazolidine- 4,4-dicarboxylate (3fb).**

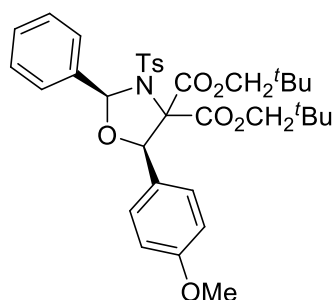

The reaction of **1f** (150.5 mg, 0.3 mmol), **2b** (61.3 mg, 0.45 mmol) in the presence of 5 mol %  $\text{Ni}(\text{ClO}_4)_2 \cdot 6\text{H}_2\text{O}$  (5.48 mg, 0.015 mmol), Bn-Box ligand (6.52 mg, 0.018 mmol), 120 mg of activated 4Å M.S. and using toluene (3 mL) as the solvent was carried out at r.t. for 12 hours to afford **3fb** (168.4 mg) in 88% yield, white solid. m.p. 136 – 139 °C;  $[\alpha]_{20}^{\text{D}} = -61.5$  ( $c = 0.5$ ,  $\text{CHCl}_3$ ); ee = 90% (chiral HPLC analysis: Chiralcel IC, *n*-hexane/*i*PrOH = 85/15, 0.8 mL/min,  $t_{\text{minor}} = 8.33$  min,  $t_{\text{major}} = 11.32$  min);  $^1\text{H}$  NMR (400 MHz,  $\text{CDCl}_3$ ):  $\delta = 7.48$  (d,  $J = 7.6$  Hz, 2 H); 7.24 – 7.30 (m, 3 H); 7.08 – 7.20 (m, 4 H); 6.89 (d,  $J = 8.4$  Hz, 2 H); 6.84 (d,  $J = 8.8$  Hz, 2 H); 6.17 (s, 1 H); 5.73 (s, 1 H); 4.21 (d,  $J = 10.4$  Hz, 1 H); 4.08 (d,  $J = 10.4$  Hz, 1 H); 3.93 (d,  $J = 10.4$  Hz, 1 H); 3.78 (s, 3 H); 2.96 (d,  $J = 10.4$  Hz, 1 H); 2.29 (s, 3 H); 1.16 (s, 9 H); 0.75 (s, 9 H).  $^{13}\text{C}$  NMR (100 MHz,  $\text{CDCl}_3$ ):  $\delta = 166.9, 166.6, 160.2, 142.7, 137.6, 133.7, 129.9, 129.8, 128.3, 128.1, 128.0, 127.9, 126.3, 113.8, 92.6, 87.2, 77.4, 76.2, 75.9, 55.3, 31.6, 31.0, 26.8, 26.2, 21.4$  ppm. IR (neat)  $\nu/\text{cm}^{-1}$  2958, 2902, 2885, 1763, 1733, 1614, 1599, 1516, 1461, 1397, 1368, 1342, 1306, 1291, 1248, 1224, 1210, 1173, 1157, 1116, 1090, 1077, 1053, 1033, 1009, 972, 926. HRMS (ESI):  $\text{C}_{35}\text{H}_{43}\text{NNaO}_8\text{S}$   $[\text{M}+\text{Na}]^+$  calcd: 660.2602, found: 660.2634.

**13. (2*S*,5*R*)-dineopentyl 2,5-diphenyl-3-tosyloxazolidine-4,4-dicarboxylate (3fd).**

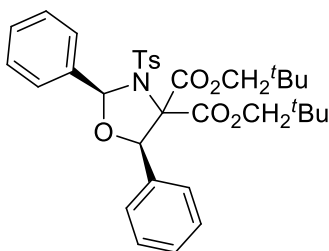

The reaction of **1f** (150.5 mg, 0.3 mmol), **2d** (95.4 mg, 0.9 mmol) in the presence of 10 mol % Ni(ClO<sub>4</sub>)<sub>2</sub>·6H<sub>2</sub>O (10.97 mg, 0.03 mmol), Bn-Box ligand (13.05 mg, 0.036 mmol), 120 mg of activated 4Å M.S. and using toluene (3 mL) as the solvent was carried out at r.t. for 12 hours to afford **3fd** (162.2 mg) in 89% yield, white solid. m.p. 138 – 141 °C; [α]<sub>20</sub><sup>D</sup> = -52.2 (*c* = 1.0, CHCl<sub>3</sub>); ee = 90% (chiral HPLC analysis: Chiralcel OZ3, *n*-hexane/*i*PrOH = 85/15, 0.8 mL/min, *t*<sub>minor</sub> = 5.04 min, *t*<sub>major</sub> = 8.63 min); <sup>1</sup>H NMR (400 MHz, CDCl<sub>3</sub>): δ = 7.49 (d, *J* = 7.2 Hz, 2 H); 7.22 – 7.40 (m, 6 H); 7.05 – 7.20 (m, 4 H); 6.89 (d, *J* = 8.0 Hz, 2 H); 6.19 (s, 1 H); 5.79 (s, 1 H); 4.22 (d, *J* = 10.4 Hz, 1 H); 4.09 (d, *J* = 10.4 Hz, 1 H); 3.92 (d, *J* = 10.4 Hz, 1 H); 2.83 (d, *J* = 10.4 Hz, 1 H); 2.29 (s, 3 H); 1.17 (s, 9 H); 0.73 (s, 9 H). <sup>13</sup>C NMR (100 MHz, CDCl<sub>3</sub>): δ = 166.9, 166.5, 142.7, 137.6, 134.4, 133.7, 129.9, 129.8, 129.1, 128.4, 128.3, 128.2, 127.9, 126.6, 92.8, 87.2, 77.4, 76.3, 75.8, 31.6, 31.0, 26.8, 26.2, 21.4 ppm. IR (neat) *v*/cm<sup>-1</sup> 2973, 2902, 1741, 1598, 1496, 1463, 1400, 1370, 1349, 1333, 1293, 1241, 1214, 1159, 1094, 1081, 1067, 1051, 1039, 1007, 976, 961, 940, 926. HRMS (ESI): C<sub>34</sub>H<sub>41</sub>NNaO<sub>7</sub>S [M+Na]<sup>+</sup> calcd: 630.2496, found: 630.2495.

**14. (2*S*,5*R*)-dineopentyl 5-(3-methoxyphenyl)-2-phenyl-3-tosyloxazolidine-4,4-dicarboxylate (3fe).**

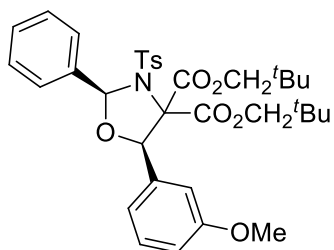

The reaction of **1f** (150.5 mg, 0.3 mmol), **2e** (61.3 mg, 0.45 mmol) in the presence of 5 mol %  $\text{Ni}(\text{ClO}_4)_2 \cdot 6\text{H}_2\text{O}$  (5.48 mg, 0.015 mmol), Bn-Box ligand (6.52 mg, 0.018 mmol), 120 mg of activated 4Å M.S. and using toluene (3 mL) as the solvent was carried out at r.t. for 24 hours to afford **3fe** (130.2 mg) in 68% yield, white solid. m.p. 118 – 121 °C;  $[\alpha]_{20}^{\text{D}} = -39.2$  ( $c = 0.5$ ,  $\text{CHCl}_3$ ); ee = 92% (chiral HPLC analysis: Chiralcel IC, *n*-hexane/<sup>*i*</sup>PrOH = 85/15, 0.8 mL/min,  $t_{\text{minor}} = 8.43$  min,  $t_{\text{major}} = 9.83$  min);  $^1\text{H}$  NMR (400 MHz,  $\text{CDCl}_3$ ):  $\delta = 7.49$  (d,  $J = 7.2$  Hz, 2 H); 7.20 – 7.38 (m, 2 H); 7.07 – 7.20 (m, 4 H); 6.73 – 7.07 (m, 5 H); 6.18 (s, 1 H); 5.77 (s, 1 H); 4.22 (d,  $J = 10.4$  Hz, 1 H); 4.08 (d,  $J = 10.4$  Hz, 1 H); 3.94 (d,  $J = 10.4$  Hz, 1 H); 3.75 (s, 3 H); 2.92 (d,  $J = 10.4$  Hz, 1 H); 2.29 (s, 3 H); 1.16 (s, 9 H); 0.74 (s, 9 H).  $^{13}\text{C}$  NMR (100 MHz,  $\text{CDCl}_3$ ):  $\delta = 166.8, 166.5, 159.6, 142.7, 137.6, 135.9, 133.7, 129.9, 129.4, 128.3, 128.2, 127.9, 118.8, 114.6, 112.2, 92.8, 87.0, 77.4, 76.3, 75.9, 55.2, 31.6, 31.0, 26.8, 26.2, 21.4$  ppm. IR (neat)  $\nu/\text{cm}^{-1}$  2956, 2938, 1759, 1739, 1599, 1494, 1467, 1370, 1357, 1281, 1260, 1238, 1214, 1163, 1155, 1096, 1086, 1072, 1035, 1003, 976, 963, 931, 921, 911. HRMS (ESI):  $\text{C}_{35}\text{H}_{43}\text{NNaO}_8\text{S}$   $[\text{M}+\text{Na}]^+$  calcd: 660.2602, found: 660.2634.

**15. (2*S*,5*R*)-dineopentyl 5-(4-isopropylphenyl)-2-phenyl-3-tosyloxazolidine-4,4-dicarboxylate (3ff).**

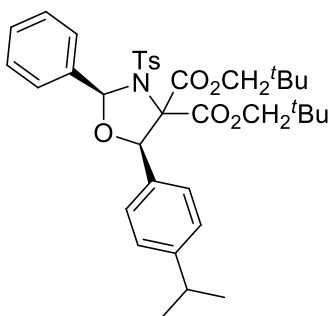

The reaction of **1f** (150.5 mg, 0.3 mmol), **2f** (66.7 mg, 0.45 mmol) in the presence of 5 mol %  $\text{Ni}(\text{ClO}_4)_2 \cdot 6\text{H}_2\text{O}$  (5.48 mg, 0.015 mmol), Bn-Box ligand (6.52 mg, 0.018 mmol), 120 mg of activated 4Å M.S. and using toluene (3 mL) as the solvent was carried out at r.t. for 12 hours to afford **3ff** (169.8 mg) in 87% yield, white solid. m.p. 102 – 105 °C;  $[\alpha]_{20}^{\text{D}} = -48.0$  ( $c = 1.0$ ,  $\text{CHCl}_3$ ); ee = 94% (chiral HPLC analysis: Chiralcel ADH, *n*-hexane/*i*PrOH = 85/15, 0.8 mL/min,  $t_{\text{minor}} = 4.59$  min,  $t_{\text{major}} = 7.57$  min);  $^1\text{H}$  NMR (400 MHz,  $\text{CDCl}_3$ ):  $\delta = 7.58$  (d,  $J = 6.8$  Hz, 2 H); 7.30 – 7.42 (m, 3 H); 7.12 – 7.31 (m, 6 H); 6.97 (d,  $J = 8.0$  Hz, 2 H); 6.28 (s, 1 H); 5.85 (s, 1 H); 4.32 (d,  $J = 10.4$  Hz, 1 H); 4.17 (d,  $J = 10.4$  Hz, 1 H); 4.00 (d,  $J = 10.4$  Hz, 1 H); 2.92 – 3.08 (m, 1 H); 2.90 (d,  $J = 10.4$  Hz, 1 H); 2.37 (s, 3 H); 1.30 (d,  $J = 6.8$  Hz, 6 H); 1.26 (s, 9 H); 0.80 (s, 9 H).  $^{13}\text{C}$  NMR (100 MHz,  $\text{CDCl}_3$ ):  $\delta = 166.9, 166.6, 149.8, 142.6, 137.6, 133.8, 131.8, 129.9, 129.8, 128.21, 128.16, 127.8, 126.7, 126.4, 92.7, 87.3, 77.4, 76.2, 75.8, 33.9, 31.6, 30.9, 26.8, 26.2, 23.9, 23.8, 21.4$  ppm. IR (neat)  $\nu/\text{cm}^{-1}$  2960, 2886, 2870, 1749, 1732, 1598, 1515, 1462, 1396, 1368, 1349, 1279, 1259, 1236, 1212, 1156, 1079, 1053, 1032, 965, 940, 923, 876, 832. HRMS (ESI):  $\text{C}_{37}\text{H}_{47}\text{NNaO}_7\text{S}$   $[\text{M}+\text{Na}]^+$  calcd: 672.2965, found: 672.2973.

**16. (2*S*,5*R*)-dineopentyl 5-(4-bromophenyl)-2-phenyl-3-tosyloxazolidine-4,4-dicarboxylate (3fg).**

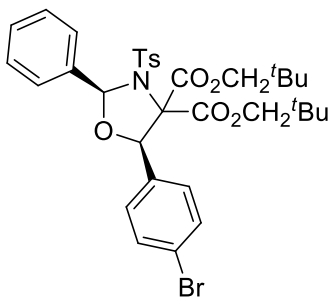

The reaction of **1f** (150.5 mg, 0.3 mmol), **2g** (166.5 mg, 0.9 mmol) in the presence of 10 mol % Ni(ClO<sub>4</sub>)<sub>2</sub>·6H<sub>2</sub>O (10.97 mg, 0.03 mmol), Bn-Box ligand (13.05 mg, 0.036 mmol), 120 mg of activated 4Å M.S. and using toluene (3 mL) as the solvent was carried out at r.t. for 24 hours to afford **3fg** (139.2 mg) in 68% yield, white solid. m.p. 152 – 155 °C; [α]<sub>20</sub><sup>D</sup> = -42.9 (*c* = 0.5, CHCl<sub>3</sub>); ee = 90% (chiral HPLC analysis: Chiralcel OZ3, *n*-hexane/*i*PrOH = 85/15, 0.4 mL/min, *t*<sub>minor</sub> = 9.89 min, *t*<sub>major</sub> = 15.37 min); <sup>1</sup>H NMR (400 MHz, CDCl<sub>3</sub>): δ = 7.41 – 7.50 (m, 4 H); 7.19 – 7.37 (m, 3 H); 7.04 – 7.18 (m, 4 H); 6.90 (d, *J* = 8.0 Hz, 2 H); 6.15 (s, 1 H); 5.73 (s, 1 H); 4.20 (d, *J* = 10.4 Hz, 1 H); 4.10 (d, *J* = 10.4 Hz, 1 H); 3.92 (d, *J* = 10.4 Hz, 1 H); 3.00 (d, *J* = 10.4 Hz, 1 H); 2.29 (s, 3 H); 1.15 (s, 9 H); 0.76 (s, 9 H). <sup>13</sup>C NMR (100 MHz, CDCl<sub>3</sub>): δ = 166.9, 166.4, 142.9, 137.5, 133.51, 133.47, 131.5, 130.0, 129.8, 128.4, 128.3, 128.2, 128.0, 123.2, 92.8, 86.5, 77.3, 76.5, 76.0, 31.6, 31.0, 26.8, 26.2, 21.4 ppm. IR (neat) *v*/cm<sup>-1</sup> 2960, 2883, 2871, 1742, 1599, 1578, 1491, 1463, 1396, 1370, 1348, 1331, 1291, 1255, 1217, 1156, 1095, 1072, 1048, 1005, 979, 963, 927. HRMS (ESI): C<sub>34</sub>H<sub>40</sub>BrNNaO<sub>7</sub>S [M+Na]<sup>+</sup> calcd: 708.1601, found: 708.1625.

**17. (2*S*,5*R*)-dineopentyl 5-(4-iodophenyl)-2-phenyl-3-tosyloxazolidine-4,4-dicarboxylate (3fh).**

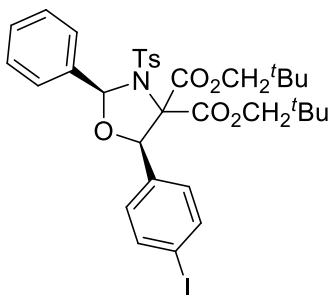

The reaction of **1f** (150.5 mg, 0.3 mmol), **2h** (208.8 mg, 0.9 mmol) in the presence of 10 mol % Ni(ClO<sub>4</sub>)<sub>2</sub>·6H<sub>2</sub>O (10.97 mg, 0.03 mmol), Bn-Box ligand (13.05 mg, 0.036 mmol), 120 mg of activated 4Å M.S. and using toluene (3 mL) as the solvent was carried out at r.t. for 12 hours to afford **3fh** (171.9 mg) in 78% yield, white solid. m.p. 129 – 131 °C; [α]<sub>20</sub><sup>D</sup> = -61.3 (*c* = 1.0, CHCl<sub>3</sub>); ee = 92% (chiral HPLC analysis: Chiralcel IC, *n*-hexane/<sup>*i*</sup>PrOH = 90/10, 0.8 mL/min, *t*<sub>minor</sub> = 7.94 min, *t*<sub>major</sub> = 10.01 min); <sup>1</sup>H NMR (400 MHz, CDCl<sub>3</sub>): δ = 7.66 (d, *J* = 8.4 Hz, 2 H); 7.45 (d, *J* = 7.2 Hz, 2 H); 7.26 – 7.34 (m, 1 H); 7.08 – 7.22 (m, 6 H); 6.90 (d, *J* = 8.0 Hz, 2 H); 6.15 (s, 1 H); 5.71 (s, 1 H); 4.20 (d, *J* = 10.4 Hz, 1 H); 4.09 (d, *J* = 10.4 Hz, 1 H); 3.92 (d, *J* = 10.4 Hz, 1 H); 3.00 (d, *J* = 10.4 Hz, 1 H); 2.30 (s, 3 H); 1.15 (s, 9 H); 0.76 (s, 9 H). <sup>13</sup>C NMR (100 MHz, CDCl<sub>3</sub>): δ = 166.9, 166.4, 142.8, 137.5, 134.2, 133.5, 130.0, 129.8, 129.0, 128.40, 128.35, 128.2, 127.9, 125.3, 95.0, 92.8, 86.5, 76.5, 76.1, 31.6, 31.0, 26.8, 26.2, 21.4 ppm. IR (neat) *v*/cm<sup>-1</sup> 2961, 2907, 2889, 1743, 1599, 1486, 1461, 1394, 1369, 1348, 1294, 1256, 1240, 1217, 1155, 1100, 1059, 1039, 1004, 979, 958, 941, 927. HRMS (ESI): C<sub>34</sub>H<sub>40</sub>INNaO<sub>7</sub>S [M+Na]<sup>+</sup> calcd: 756.1462, found: 756.1438.

18. (2*S*,5*S*)-dineopentyl 5-(furan-2-yl)-2-phenyl-3-tosyloxazolidine-4,4-dicarboxylate (**3fi**).

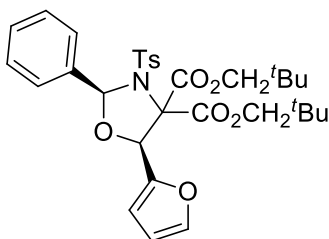

The reaction of **1f** (150.5 mg, 0.3 mmol), **2i** (45.2 mg, 0.45 mmol) in the presence of 5 mol % Ni(ClO<sub>4</sub>)<sub>2</sub>·6H<sub>2</sub>O (5.48 mg, 0.015 mmol), Bn-Box ligand (6.52 mg, 0.018 mmol), 120 mg of activated 4Å M.S. and using toluene (3 mL) as the solvent was carried out at r.t. for 12 hours to afford **3fi** (167.7 mg) in 94% yield, white solid. m.p. 108 – 111 °C; [α]<sub>20</sub><sup>D</sup> = -42.7 (*c* = 1.0, CHCl<sub>3</sub>); ee = 88% (chiral HPLC analysis:



Chiralcel OZ3, *n*-hexane/*i*PrOH = 85/15, 0.8 mL/min,  $t_{\text{minor}} = 6.88$  min,  $t_{\text{major}} = 8.34$  min);  $^1\text{H NMR}$  (400 MHz,  $\text{CDCl}_3$ ):  $\delta = 7.36 - 7.62$  (m, 3 H); 7.22 – 7.36 (m, 1 H); 7.19 (d,  $J = 8.0$  Hz, 2 H); 7.13 (t,  $J = 7.6$  Hz, 2 H); 6.91 (d,  $J = 8.0$  Hz, 2 H); 6.38 – 6.48 (m, 1 H); 6.27 – 6.38 (m, 1 H); 6.15 (s, 1 H); 5.83 (s, 1 H); 4.19 (d,  $J = 10.4$  Hz, 1 H); 4.14 (d,  $J = 10.4$  Hz, 1 H); 4.08 (d,  $J = 10.4$  Hz, 1 H); 3.25 (d,  $J = 10.4$  Hz, 1 H); 2.29 (s, 3 H); 1.13 (s, 9 H); 0.87 (s, 9 H).  $^{13}\text{C NMR}$  (100 MHz,  $\text{CDCl}_3$ ):  $\delta = 166.7$ , 166.2, 147.7, 143.4, 142.8, 137.5, 133.8, 129.9, 129.8, 128.3, 127.9, 110.6, 109.9, 92.9, 81.3, 77.2, 76.3, 76.2, 31.6, 31.3, 26.7, 26.3, 21.4 ppm. IR (neat)  $\nu/\text{cm}^{-1}$  2885, 1742, 1703, 1598, 1505, 1478, 1414, 1401, 1368, 1353, 1332, 1238, 1215, 1160, 1095, 1083, 1052, 1037, 1012, 984, 962, 954, 917. HRMS (ESI):  $\text{C}_{32}\text{H}_{39}\text{NNaO}_8\text{S}$   $[\text{M}+\text{Na}]^+$  calcd: 620.2289, found: 620.2298.

**19. (2*S*,5*R*)-dineopentyl 5-(naphthalen-1-yl)-2-phenyl-3-tosyloxazolidine-4,4-dicarboxylate (3fj).**

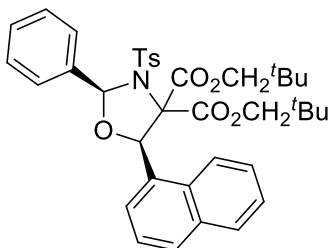

The reaction of **1f** (150.5 mg, 0.3 mmol), **2j** (140.6 mg, 0.9 mmol) in the presence of 10 mol %  $\text{Ni}(\text{ClO}_4)_2 \cdot 6\text{H}_2\text{O}$  (10.97 mg, 0.03 mmol), Bn-Box ligand (13.05 mg, 0.036 mmol), 120 mg of activated 4Å M.S. and using toluene (3 mL) as the solvent was carried out at r.t. for 18 hours to afford **3fj** (150.2 mg) in 76% yield, white solid. m.p. 168 – 171 °C;  $[\alpha]_{20}^{\text{D}} = -80.4$  ( $c = 1.0$ ,  $\text{CHCl}_3$ ); ee = 86% (chiral HPLC analysis: Chiralcel ADH, *n*-hexane/*i*PrOH = 90/10, 0.5 mL/min,  $t_{\text{minor}} = 10.10$  min,  $t_{\text{major}} = 8.85$  min);  $^1\text{H NMR}$  (400 MHz,  $\text{CDCl}_3$ ):  $\delta = 7.76 - 7.90$  (m, 3 H); 7.65 (d,  $J = 7.2$  Hz, 1 H); 7.36 – 7.62 (m, 5 H); 7.30 (t,  $J = 7.4$  Hz, 1 H); 7.08 – 7.22 (m, 4 H); 6.89 (d,  $J = 8.4$  Hz, 2 H); 6.64 (s, 1 H); 6.33 (s, 1 H); 4.34 (d,  $J = 10.4$  Hz, 1 H); 4.11 (d,  $J = 10.4$  Hz, 1 H); 3.85 (d,  $J = 10.4$  Hz, 1 H); 2.29 (s, 3 H); 2.24 (d,  $J = 10.4$  Hz, 1 H); 1.25 (s, 9 H);

0.35 (s, 9 H).  $^{13}\text{C}$  NMR (100 MHz,  $\text{CDCl}_3$ ):  $\delta = 166.9, 166.6, 142.8, 137.5, 133.9, 133.7, 131.10, 131.05, 130.0, 129.9, 129.5, 128.9, 128.3, 128.2, 128.0, 126.7, 125.8, 125.1, 124.4, 122.4, 92.8, 84.1, 77.6, 76.8, 75.6, 31.5, 30.5, 26.9, 25.7, 21.4$  ppm. IR (neat)  $\nu/\text{cm}^{-1}$  2958, 2926, 2869, 1963, 1733, 1598, 1513, 1477, 1462, 1400, 1366, 1346, 1324, 1293, 1262, 1227, 1156, 1090, 1080, 1051, 1037, 1008, 962, 921. HRMS (ESI):  $\text{C}_{38}\text{H}_{43}\text{NNaO}_7\text{S}$   $[\text{M}+\text{Na}]^+$  calcd: 680.2652, found: 680.2639.

**20. (2*S*,5*R*)-dineopentyl 2-phenyl-5-((*E*)-styryl)-3-tosyloxazolidine-4,4-dicarboxylate (**3fk**).**

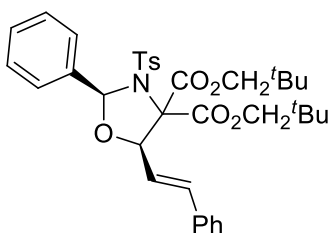

The reaction of **1f** (150.5 mg, 0.3 mmol), **2k** (59.5 mg, 0.45 mmol) in the presence of 5 mol %  $\text{Ni}(\text{ClO}_4)_2 \cdot 6\text{H}_2\text{O}$  (5.48 mg, 0.015 mmol), Bn-Box ligand (6.52 mg, 0.018 mmol), 120 mg of activated 4Å M.S. and using toluene (3 mL) as the solvent was carried out at r.t. for 12 hours to afford **3fk** (176.8 mg) in 93% yield, white solid. m.p. 114 – 116 °C;  $[\alpha]_{20}^{\text{D}} = -34.9$  ( $c = 1.0, \text{CHCl}_3$ ); ee = 85% (chiral HPLC analysis: Chiralcel OZ3, *n*-hexane/*i*PrOH = 85/15, 0.8 mL/min,  $t_{\text{minor}} = 6.60$  min,  $t_{\text{major}} = 14.35$  min);  $^1\text{H}$  NMR (400 MHz,  $\text{CDCl}_3$ ):  $\delta = 7.22 - 7.48$  (m, 10 H); 7.13 (t,  $J = 7.6$  Hz, 2 H); 6.94 (d,  $J = 8.0$  Hz, 2 H); 6.71 (d,  $J = 16.0$  Hz, 2 H); 6.30 (dd,  $J_1 = 16.0$  Hz,  $J_2 = 7.2$  Hz, 1 H); 6.04 (s, 1 H); 5.29 (d,  $J = 7.6$  Hz, 1 H); 4.11 (s, 2 H); 4.07 (d,  $J = 10.4$  Hz, 1 H); 3.82 (d,  $J = 10.4$  Hz, 1 H); 2.31 (s, 3 H); 1.10 (s, 9 H); 0.90 (s, 9 H).  $^{13}\text{C}$  NMR (100 MHz,  $\text{CDCl}_3$ ):  $\delta = 167.0, 166.7, 142.9, 137.5, 135.6, 134.9, 133.9, 129.8, 129.6, 128.5, 128.42, 128.39, 128.3, 127.9, 126.9, 122.0, 92.9, 86.6, 76.8, 76.3, 76.2, 31.5, 31.4, 26.6, 26.4, 21.4$  ppm. IR (neat)  $\nu/\text{cm}^{-1}$  3065, 3030, 2957, 2887, 2869, 1748, 1728, 1684, 1600, 1478, 1460, 1398, 1369, 1342, 1274, 1249, 1233, 1156, 1093, 1065, 1034, 1004, 962, 939, 911. HRMS (ESI):  $\text{C}_{36}\text{H}_{43}\text{NNaO}_7\text{S}$   $[\text{M}+\text{Na}]^+$  calcd: 656.2652, found: 656.2655.

**21. (2*S*,5*R*)-dineopentyl 2-phenyl-5-((*E*)-1-phenylprop-1-en-2-yl)-3-tosyloxazolidine-4,4-dicarboxylate (3fl).**

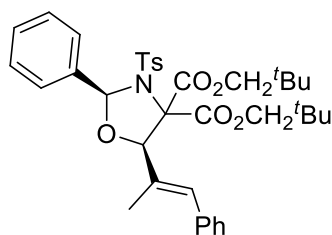

The reaction of **1f** (150.5 mg, 0.3 mmol), **2l** (65.8 mg, 0.45 mmol) in the presence of 5 mol % Ni(ClO<sub>4</sub>)<sub>2</sub>·6H<sub>2</sub>O (5.48 mg, 0.015 mmol), Bn-Box ligand (6.52 mg, 0.018 mmol), 120 mg of activated 4Å M.S. and using toluene (3 mL) as the solvent was carried out at r.t. for 18 hours to afford **3fl** (158.4 mg) in 82% yield, white solid. m.p. 137 – 140 °C; [α]<sub>20</sub><sup>D</sup> = -70.2 (*c* = 0.5, CHCl<sub>3</sub>); ee = 92% (chiral HPLC analysis: Chiralcel IC, *n*-hexane/*i*PrOH = 95/5, 0.8 mL/min, *t*<sub>minor</sub> = 10.41 min, *t*<sub>major</sub> = 11.49 min); <sup>1</sup>H NMR (400 MHz, CDCl<sub>3</sub>): δ = 7.43 (d, *J* = 7.2 Hz, 2 H); 7.28 – 7.36 (m, 3 H); 7.18 – 7.26 (m, 3 H); 7.12 – 7.18 (m, 4 H); 6.92 (d, *J* = 8.0 Hz, 2 H); 6.65 (s, 1 H); 6.08 (s, 1 H); 5.30 (s, 1 H); 4.28 (d, *J* = 10.4 Hz, 1 H); 4.15 (d, *J* = 10.4 Hz, 1 H); 4.03 (d, *J* = 10.4 Hz, 1 H); 3.55 (d, *J* = 10.4 Hz, 1 H); 2.30 (s, 3 H); 1.92 (s, 3 H); 1.13 (s, 9 H); 0.93 (s, 9 H). <sup>13</sup>C NMR (100 MHz, CDCl<sub>3</sub>): δ = 167.2, 166.8, 142.8, 137.4, 136.5, 134.0, 130.9, 129.9, 129.8, 129.0, 128.3, 128.2, 128.1, 127.9, 127.8, 126.9, 92.6, 89.4, 76.4, 76.1, 31.5, 31.4, 26.7, 26.5, 21.4, 15.8 ppm. IR (neat) *v*/cm<sup>-1</sup> 2959, 2916, 2884, 1758, 1740, 1600, 1495, 1473, 1447, 1411, 1398, 1376, 1366, 1344, 1326, 1306, 1292, 1230, 1156, 1087, 1058, 1037, 1026, 1010, 986, 971, 921, 902. HRMS (ESI): C<sub>37</sub>H<sub>45</sub>NNaO<sub>7</sub>S [M+Na]<sup>+</sup> calcd: 670.2809, found: 670.2820.

**22. (2*S*,5*R*)-dineopentyl 2-phenyl-5-((*E*)-prop-1-en-1-yl)-3-tosyloxazolidine-4,4-dicarboxylate (3fm).**

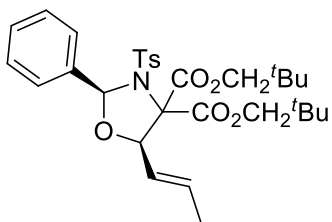

The reaction of **1f** (150.5 mg, 0.3 mmol), **2m** (31.5 mg, 0.45 mmol) in the presence of 5 mol % Ni(ClO<sub>4</sub>)<sub>2</sub>·6H<sub>2</sub>O (5.48 mg, 0.015 mmol), Bn-Box ligand (6.52 mg, 0.018 mmol), 120 mg of activated 4Å M.S. and using toluene (3 mL) as the solvent was carried out at r.t. for 12 hours to afford **3fm** (168.8 mg) in 99% yield, white solid. m.p. 80 – 83 °C; [α]<sub>20</sub><sup>D</sup> = -26.6 (*c* = 0.5, CHCl<sub>3</sub>); ee = 69% (chiral HPLC analysis: Chiralcel IC, *n*-hexane/*i*PrOH = 85/15, 0.8 mL/min, *t*<sub>minor</sub> = 12.63 min, *t*<sub>major</sub> = 11.35 min); <sup>1</sup>H NMR (400 MHz, CDCl<sub>3</sub>): δ = 7.30 (d, *J* = 7.2 Hz, 2 H); 7.15 – 7.26 (m, 3 H); 7.08 (t, *J* = 7.6 Hz, 2 H); 6.90 (d, *J* = 8.0 Hz, 2 H); 5.99 (s, 1 H); 5.82 – 5.96 (m, 1 H); 5.54 – 5.76 (m, 1 H); 5.08 (d, *J* = 8.0 Hz, 1 H); 4.00 – 4.13 (m, 3 H); 3.92 (d, *J* = 10.4 Hz, 1 H); 2.28 (s, 3 H); 1.68 – 1.88 (m, 3 H); 1.08 (s, 9 H); 1.02 (s, 9 H). <sup>13</sup>C NMR (100 MHz, CDCl<sub>3</sub>): δ = 166.9, 166.8, 142.7, 137.6, 134.0, 132.9, 129.7, 129.5, 128.3, 128.2, 127.8, 124.4, 92.7, 86.9, 76.6, 76.2, 31.5, 31.4, 26.6, 26.5, 21.4, 17.9 ppm. IR (neat) *v*/cm<sup>-1</sup> 2960, 2870, 1743, 1677, 1598, 1477, 1463, 1403, 1369, 1345, 1306, 1261, 1237, 1217, 1156, 1093, 1051, 1032, 1015, 994, 968, 929, 902. HRMS (ESI): C<sub>31</sub>H<sub>41</sub>NNaO<sub>7</sub>S [M+Na]<sup>+</sup> calcd: 594.2496, found: 594.2528.

**23. (2*S*,5*R*)-dineopentyl 5-((*E*)-but-2-en-2-yl)-2-phenyl-3-tosyloxazolidine-4,4-dicarboxylate (3fn).**

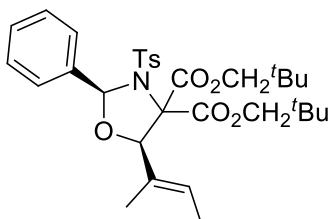

The reaction of **1f** (150.5 mg, 0.3 mmol), **2n** (37.9 mg, 0.45 mmol) in the presence of 5 mol % Ni(ClO<sub>4</sub>)<sub>2</sub>·6H<sub>2</sub>O (5.48 mg, 0.015 mmol), Bn-Box ligand (6.52 mg, 0.018

mmol), 120 mg of activated 4Å M.S. and using toluene (3 mL) as the solvent was carried out at r.t. for 20 hours to afford **3fn** (160.2 mg) in 91% yield, white solid. m.p. 108 – 111 °C;  $[\alpha]_{20}^D = -30.6$  ( $c = 1.0$ ,  $\text{CHCl}_3$ ); ee = 87% (chiral HPLC analysis: Chiralcel IC, *n*-hexane/*i*PrOH = 95/5, 0.8 mL/min,  $t_{\text{minor}} = 12.01$  min,  $t_{\text{major}} = 12.88$  min);  $^1\text{H}$  NMR (400 MHz,  $\text{CDCl}_3$ ):  $\delta = 7.38$  (d,  $J = 7.6$  Hz, 2 H); 7.23 – 7.40 (m, 1 H); 7.02 – 7.20 (m, 4 H); 6.88 (d,  $J = 8.4$  Hz, 2 H); 6.04 (s, 1 H); 5.69 (q,  $J = 6.4$  Hz, 1 H); 5.13 (s, 1 H); 4.22 (d,  $J = 10.4$  Hz, 1 H); 4.13 (d,  $J = 10.4$  Hz, 1 H); 3.98 (d,  $J = 10.4$  Hz, 1 H); 3.61 (d,  $J = 10.4$  Hz, 1 H); 2.28 (s, 3 H); 1.64 (s, 3 H); 1.61 (d,  $J = 7.2$  Hz, 3 H); 1.11 (s, 9 H); 1.02 (s, 9 H).  $^{13}\text{C}$  NMR (100 MHz,  $\text{CDCl}_3$ ):  $\delta = 167.1, 142.7, 137.6, 134.1, 129.79, 129.76, 129.1, 128.3, 128.2, 127.8, 123.7, 92.4, 89.6, 76.5, 76.3, 76.2, 31.4, 26.7, 26.5, 21.4, 13.5, 13.2$  ppm. IR (neat)  $\nu/\text{cm}^{-1}$  2961, 2869, 1752, 1738, 1599, 1477, 1461, 1403, 1368, 1344, 1262, 1237, 1210, 1156, 1094, 1052, 1028, 1008, 984, 959, 940. HRMS (ESI):  $\text{C}_{32}\text{H}_{43}\text{NNaO}_7\text{S}$   $[\text{M}+\text{Na}]^+$  calcd: 608.2652, found: 608.2672.

**24. (2*S*,5*R*)-dineopentyl 5-cyclohexenyl-2-phenyl-3-tosyloxazolidine-4,4-dicarboxylate (**3fo**).**

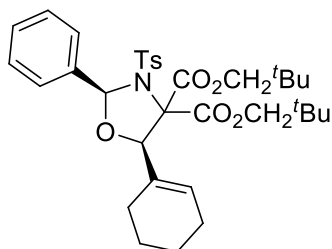

The reaction of **1f** (150.5 mg, 0.3 mmol), **2o** (49.6 mg, 0.45 mmol) in the presence of 5 mol %  $\text{Ni}(\text{ClO}_4)_2 \cdot 6\text{H}_2\text{O}$  (5.48 mg, 0.015 mmol), Bn-Box ligand (6.52 mg, 0.018 mmol), 120 mg of activated 4Å M.S. and using toluene (3 mL) as the solvent was carried out at r.t. for 18 hours to afford **3fo** (145.0 mg) in 79% yield, white solid. m.p. 130 – 133 °C;  $[\alpha]_{20}^D = -41.2$  ( $c = 0.5$ ,  $\text{CHCl}_3$ ); ee = 85% (chiral HPLC analysis: Chiralcel OZ3, *n*-hexane/*i*PrOH = 95/5, 0.8 mL/min,  $t_{\text{minor}} = 6.82$  min,  $t_{\text{major}} = 11.89$  min);  $^1\text{H}$  NMR (400 MHz,  $\text{CDCl}_3$ ):  $\delta = 7.39$  (d,  $J = 7.2$  Hz, 2 H); 7.25 – 7.33 (m, 1 H); 7.04 – 7.20 (m, 4 H); 6.90 (d,  $J = 8.4$  Hz, 2 H); 6.01 (s, 1 H); 5.83 – 5.90 (m, 1 H); 5.06 (s, 1 H); 4.40 (d,  $J = 10.4$  Hz, 1 H); 4.11 (d,  $J = 10.4$  Hz, 1 H); 4.00 (d,  $J = 10.4$

Hz, 1 H); 3.57 (d,  $J = 10.4$  Hz, 1 H); 2.29 (s, 3 H); 1.84 – 2.16 (m, 4 H); 1.50 – 1.70 (m, 4 H); 1.11 (s, 9 H); 1.04 (s, 9 H).  $^{13}\text{C}$  NMR (100 MHz,  $\text{CDCl}_3$ ):  $\delta = 167.2, 166.7, 142.7, 137.5, 134.0, 131.4, 129.8, 128.3, 128.1, 127.8, 125.9, 92.3, 88.4, 76.4, 76.1, 75.6, 31.8, 31.4, 26.7, 26.5, 25.6, 24.8, 22.2, 22.0, 21.4$  ppm. IR (neat)  $\nu/\text{cm}^{-1}$  2948, 2900, 1757, 1737, 1598, 1462, 1401, 1369, 1351, 1327, 1308, 1291, 1235, 1214, 1156, 1095, 1040, 1004, 980, 959, 916. HRMS (ESI):  $\text{C}_{34}\text{H}_{45}\text{NNaO}_7\text{S}$   $[\text{M}+\text{Na}]^+$  calcd: 634.2809, found: 634.2882.

## HPLC results

**3fc** HPLC using an IC (*n*-Hexane/*i*PrOH=85/15, flow rate 0.8 ml/min)

Racemic **3fc**

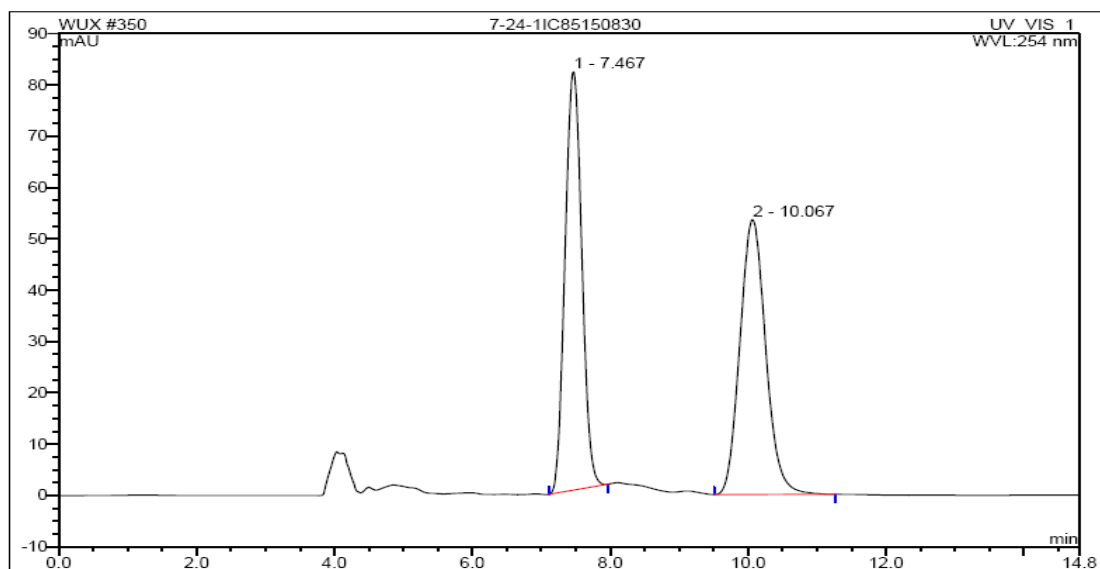

| 序号  | 保留时间<br>min | 峰名称  | 峰高<br>mAU | 峰面积<br>mAU*min | 相对峰面积<br>% | 样品量   | 类型  |
|-----|-------------|------|-----------|----------------|------------|-------|-----|
| 1   | 7.47        | n.a. | 81.519    | 22.987         | 49.74      | n.a.  | BMB |
| 2   | 10.07       | n.a. | 53.559    | 23.223         | 50.26      | n.a.  | BMB |
| 总和: |             |      | 135.078   | 46.210         | 100.00     | 0.000 |     |

Enantioenriched **3fc**

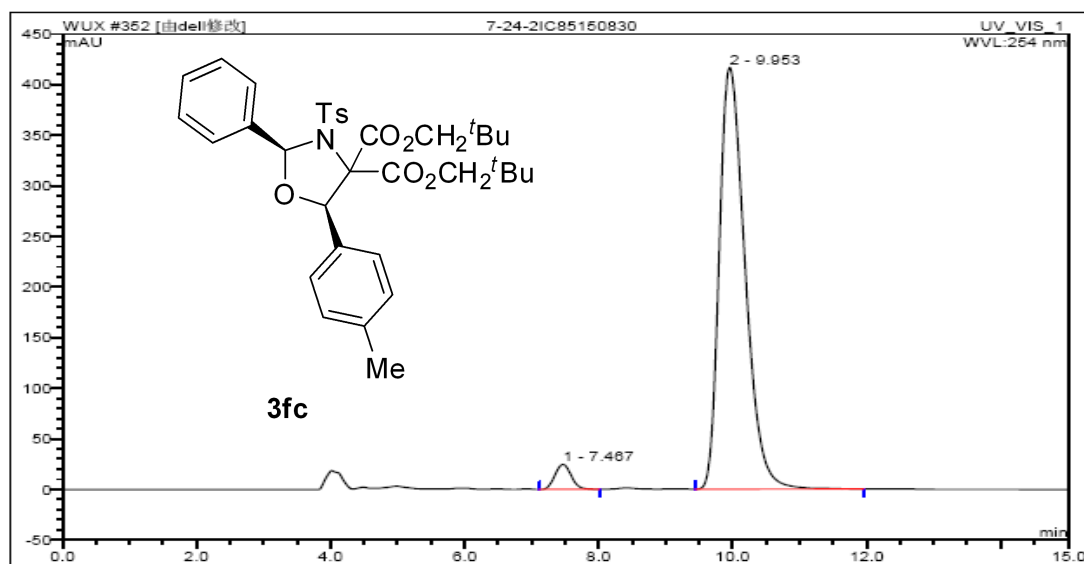

| 序号  | 保留时间<br>min | 峰名称  | 峰高<br>mAU | 峰面积<br>mAU*min | 相对峰面积<br>% | 样品量   | 类型  |
|-----|-------------|------|-----------|----------------|------------|-------|-----|
| 1   | 7.47        | n.a. | 24.529    | 6.871          | 3.56       | n.a.  | BMB |
| 2   | 9.95        | n.a. | 416.867   | 185.866        | 96.44      | n.a.  | BMB |
| 总和: |             |      | 441.397   | 192.737        | 100.00     | 0.000 |     |

**3gc** HPLC using an IC (*n*-Hexane/*i*PrOH=85/15, flow rate 0.8 ml/min)

Racemic **3gc**

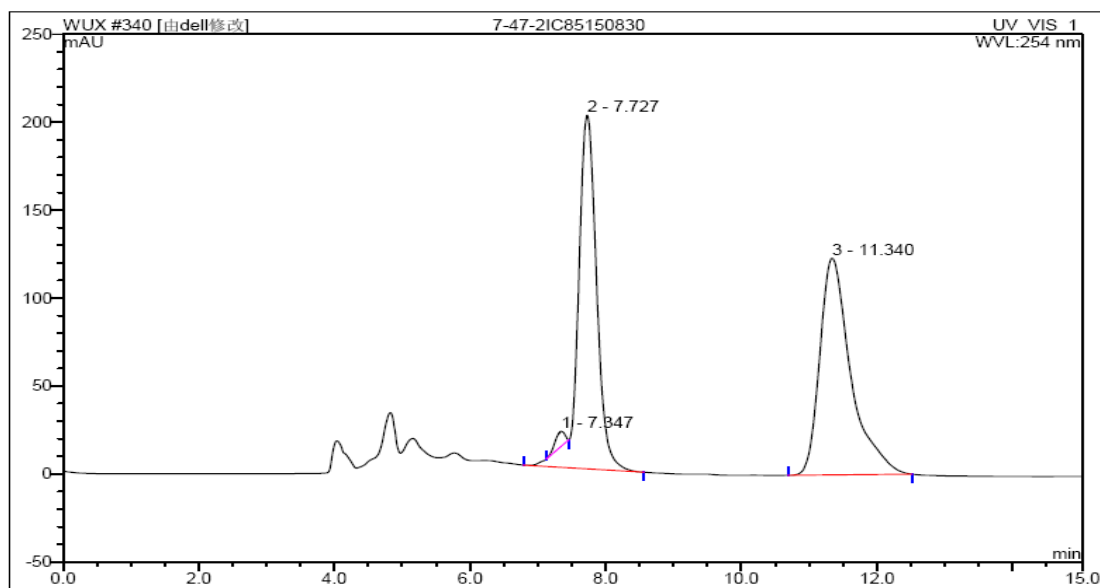

| 序号  | 保留时间<br>min | 峰名称  | 峰高<br>mAU | 峰面积<br>mAU*min | 相对峰面积<br>% | 样品量   | 类型   |
|-----|-------------|------|-----------|----------------|------------|-------|------|
| 1   | 7.35        | n.a. | 8.500     | 1.447          | 1.11       | n.a.  | Ru   |
| 2   | 7.73        | n.a. | 201.191   | 63.976         | 48.97      | n.a.  | BMB  |
| 3   | 11.34       | n.a. | 123.264   | 65.211         | 49.92      | n.a.  | BMB* |
| 总和: |             |      | 332.955   | 130.635        | 100.00     | 0.000 |      |

Enantioenriched **3gc**

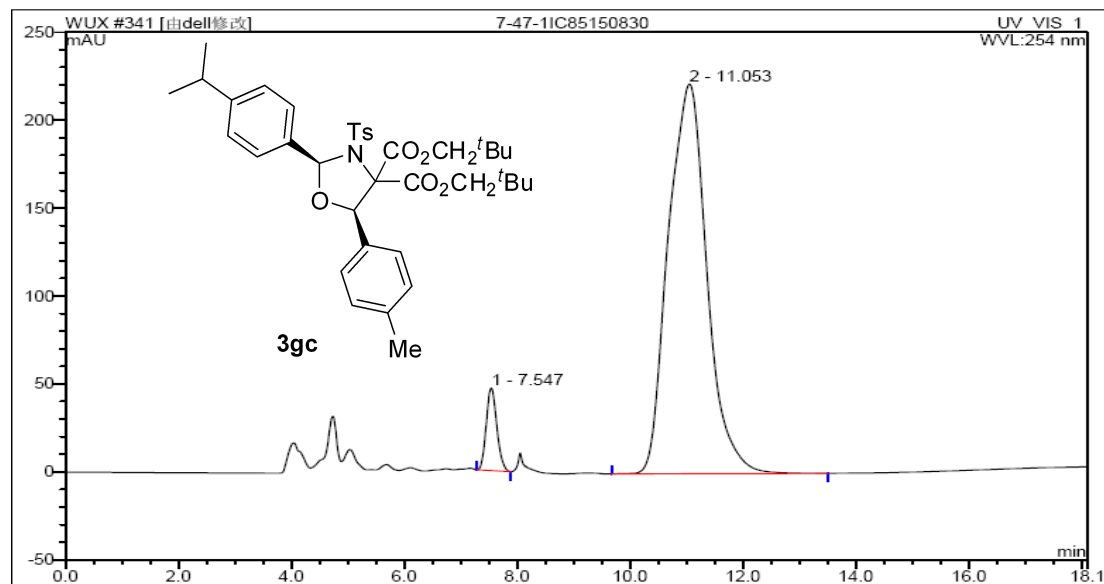

| 序号  | 保留时间<br>min | 峰名称  | 峰高<br>mAU | 峰面积<br>mAU*min | 相对峰面积<br>% | 样品量   | 类型  |
|-----|-------------|------|-----------|----------------|------------|-------|-----|
| 1   | 7.55        | n.a. | 46.936    | 10.205         | 5.49       | n.a.  | BMB |
| 2   | 11.05       | n.a. | 221.574   | 175.690        | 94.51      | n.a.  | BMB |
| 总和: |             |      | 268.510   | 185.895        | 100.00     | 0.000 |     |



**3hc** HPLC using an IC (*n*-Hexane/*i*PrOH=85/15, flow rate 0.8 ml/min)

Racemic **3hc**

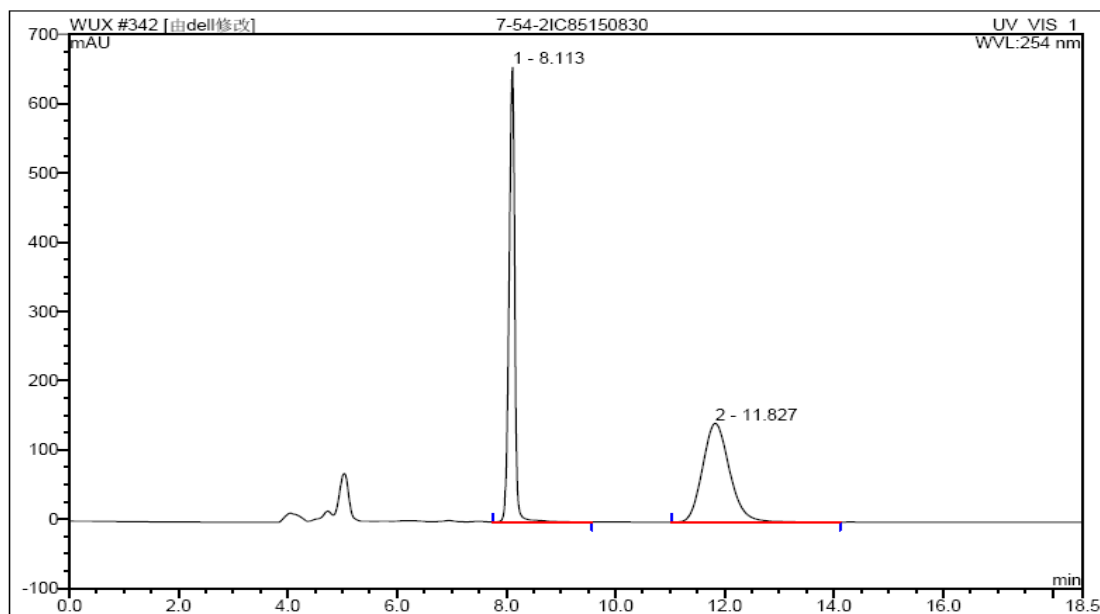

| 序号  | 保留时间<br>min | 峰名称  | 峰高<br>mAU | 峰面积<br>mAU*min | 相对峰面积<br>% | 样品量   | 类型  |
|-----|-------------|------|-----------|----------------|------------|-------|-----|
| 1   | 8.11        | n.a. | 656.421   | 79.440         | 49.30      | n.a.  | BMB |
| 2   | 11.83       | n.a. | 142.592   | 81.684         | 50.70      | n.a.  | BMB |
| 总和: |             |      | 799.013   | 161.124        | 100.00     | 0.000 |     |

Enantioenriched **3hc**

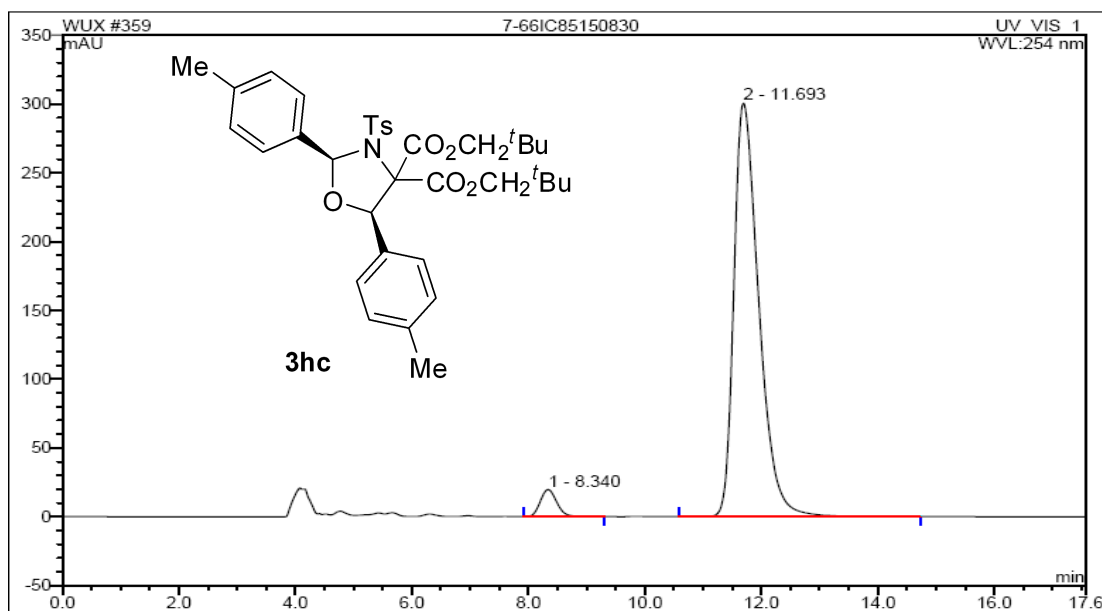

| 序号  | 保留时间<br>min | 峰名称  | 峰高<br>mAU | 峰面积<br>mAU*min | 相对峰面积<br>% | 样品量   | 类型  |
|-----|-------------|------|-----------|----------------|------------|-------|-----|
| 1   | 8.34        | n.a. | 19.649    | 6.478          | 4.17       | n.a.  | BMB |
| 2   | 11.69       | n.a. | 300.696   | 149.058        | 95.83      | n.a.  | BMB |
| 总和: |             |      | 320.345   | 155.536        | 100.00     | 0.000 |     |

**3ic** HPLC using an IC (*n*-Hexane/*i*PrOH=85/15, flow rate 0.8 ml/min)

Racemic **3ic**

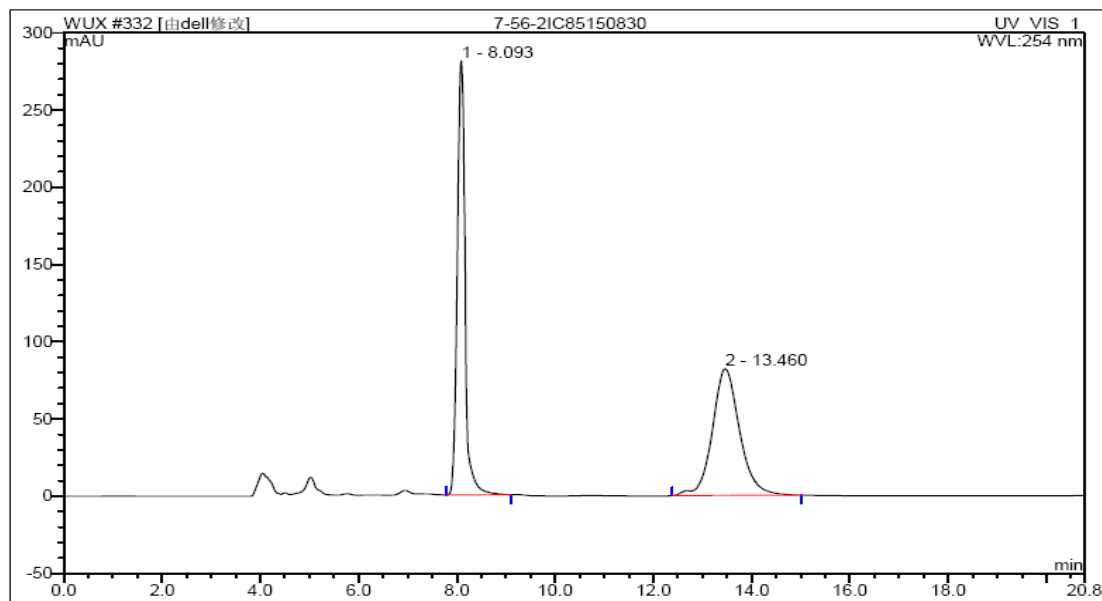

| 序号  | 保留时间<br>min | 峰名称  | 峰高<br>mAU | 峰面积<br>mAU*min | 相对峰面积<br>% | 样品量   | 类型   |
|-----|-------------|------|-----------|----------------|------------|-------|------|
| 1   | 8.09        | n.a. | 280.973   | 51.860         | 49.53      | n.a.  | BMB  |
| 2   | 13.46       | n.a. | 82.024    | 52.849         | 50.47      | n.a.  | BMB* |
| 总和: |             |      | 362.998   | 104.709        | 100.00     | 0.000 |      |

Enantioenriched **3ic**

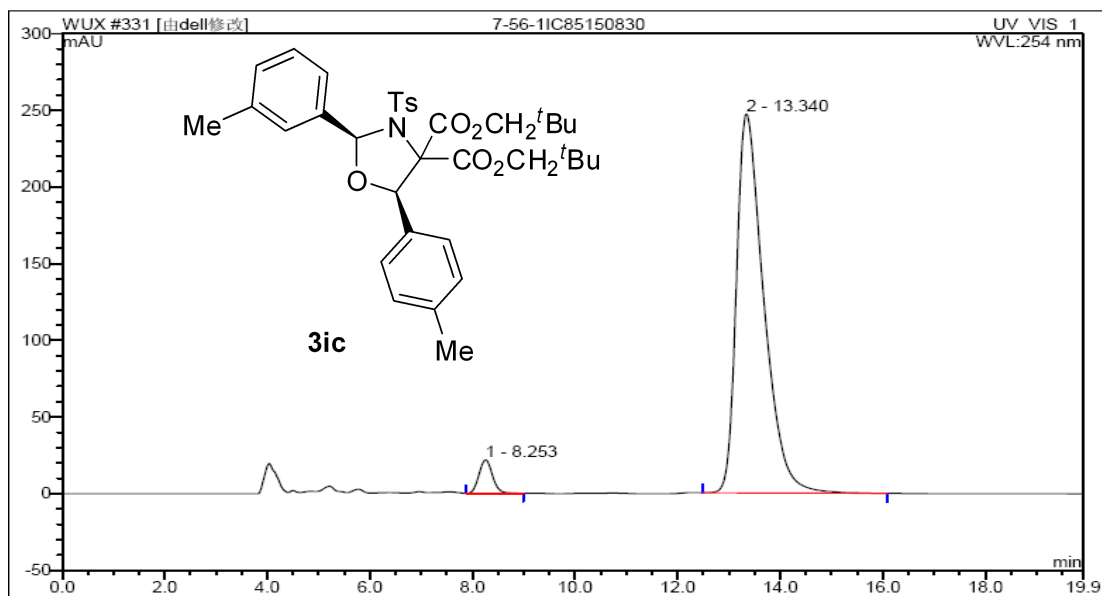

| 序号  | 保留时间<br>min | 峰名称  | 峰高<br>mAU | 峰面积<br>mAU*min | 相对峰面积<br>% | 样品量   | 类型  |
|-----|-------------|------|-----------|----------------|------------|-------|-----|
| 1   | 8.25        | n.a. | 21.815    | 6.602          | 4.15       | n.a.  | BMB |
| 2   | 13.34       | n.a. | 247.066   | 152.448        | 95.85      | n.a.  | BMB |
| 总和: |             |      | 268.881   | 159.049        | 100.00     | 0.000 |     |

**3jc** HPLC using an IC (*n*-Hexane/*i*PrOH=85/15, flow rate 0.8 ml/min)

Racemic **3jc**

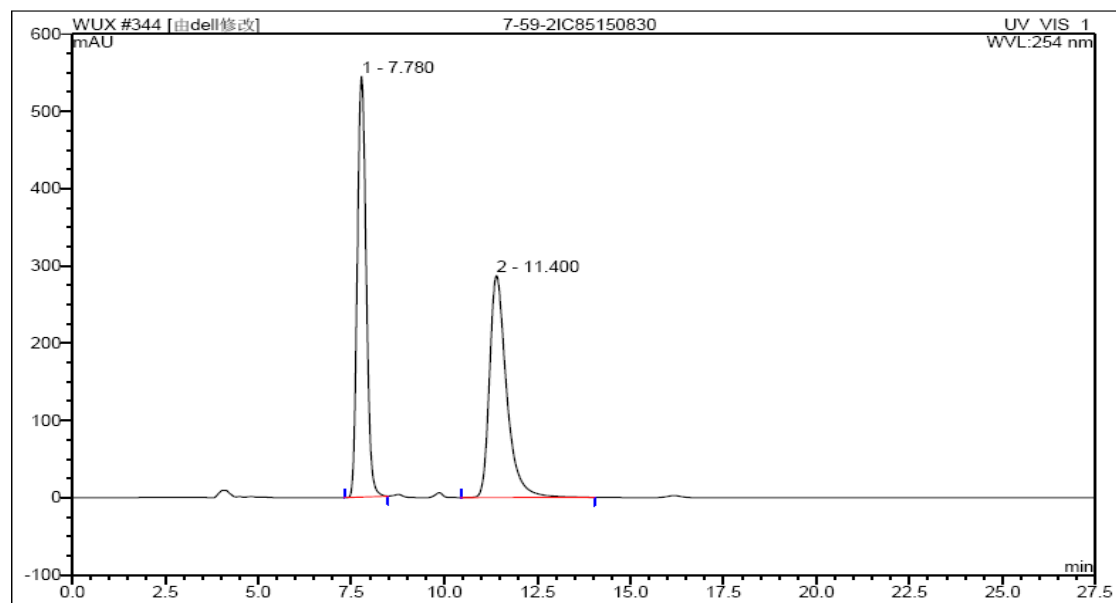

| 序号  | 保留时间<br>min | 峰名称  | 峰高<br>mAU | 峰面积<br>mAU*min | 相对峰面积<br>% | 样品量   | 类型   |
|-----|-------------|------|-----------|----------------|------------|-------|------|
| 1   | 7.78        | n.a. | 544.070   | 151.262        | 49.73      | n.a.  | BMB* |
| 2   | 11.40       | n.a. | 287.044   | 152.892        | 50.27      | n.a.  | BMB  |
| 总和: |             |      | 831.115   | 304.154        | 100.00     | 0.000 |      |

Enantioenriched **3jc**

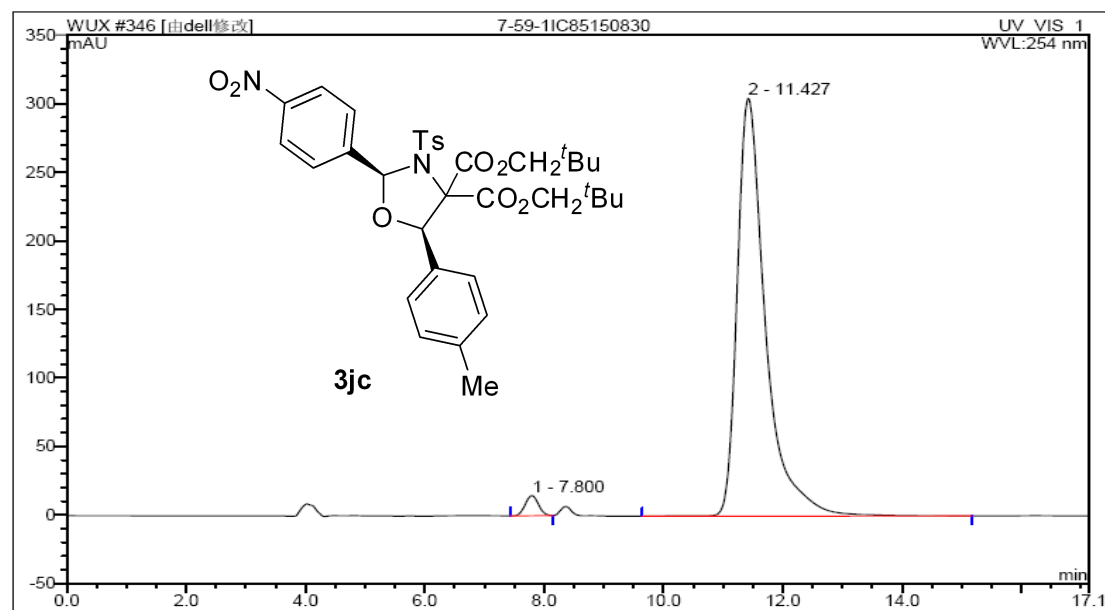

| 序号  | 保留时间<br>min | 峰名称  | 峰高<br>mAU | 峰面积<br>mAU*min | 相对峰面积<br>% | 样品量   | 类型   |
|-----|-------------|------|-----------|----------------|------------|-------|------|
| 1   | 7.80        | n.a. | 14.611    | 3.760          | 2.19       | n.a.  | BMB* |
| 2   | 11.43       | n.a. | 304.864   | 167.643        | 97.81      | n.a.  | BMB  |
| 总和: |             |      | 319.475   | 171.404        | 100.00     | 0.000 |      |

**3kc** HPLC using an OZ3 (*n*-Hexane/*i*PrOH=95/05, flow rate 0.8 ml/min)

Racemic **3kc**

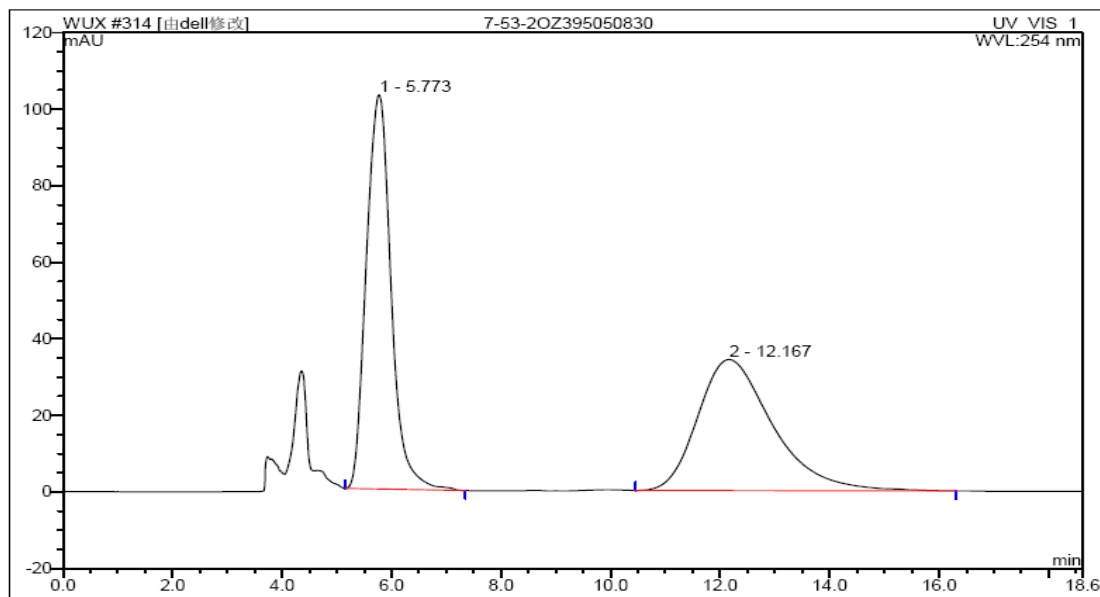

| 序号  | 保留时间<br>min | 峰名称  | 峰高<br>mAU | 峰面积<br>mAU*min | 相对峰面积<br>% | 样品量   | 类型  |
|-----|-------------|------|-----------|----------------|------------|-------|-----|
| 1   | 5.77        | n.a. | 102.977   | 53.923         | 49.91      | n.a.  | BMB |
| 2   | 12.17       | n.a. | 34.213    | 54.110         | 50.09      | n.a.  | BMB |
| 总和: |             |      | 137.190   | 108.033        | 100.00     | 0.000 |     |

Enantioenriched **3kc**

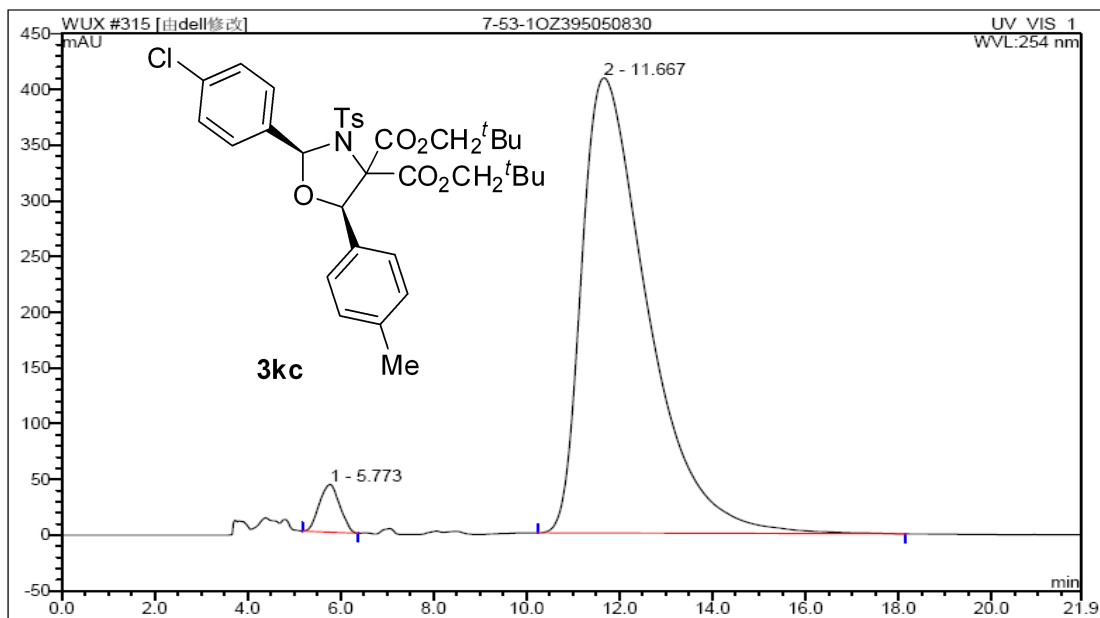

| 序号  | 保留时间<br>min | 峰名称  | 峰高<br>mAU | 峰面积<br>mAU*min | 相对峰面积<br>% | 样品量   | 类型   |
|-----|-------------|------|-----------|----------------|------------|-------|------|
| 1   | 5.77        | n.a. | 42.707    | 21.732         | 3.14       | n.a.  | BMB  |
| 2   | 11.67       | n.a. | 408.331   | 670.202        | 96.86      | n.a.  | BMB* |
| 总和: |             |      | 451.037   | 691.934        | 100.00     | 0.000 |      |

**3lc** HPLC using an IC (*n*-Hexane/*i*PrOH=85/15, flow rate 0.8 ml/min)

Racemic **3lc**

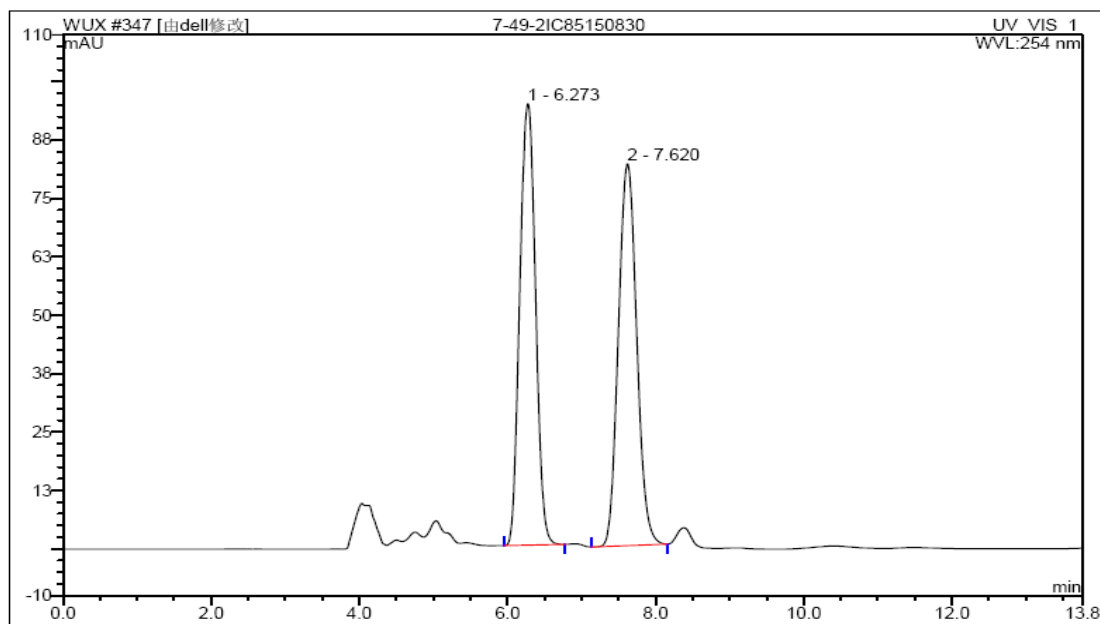

| 序号  | 保留时间<br>min | 峰名称  | 峰高<br>mAU | 峰面积<br>mAU*min | 相对峰面积<br>% | 样品量   | 类型   |
|-----|-------------|------|-----------|----------------|------------|-------|------|
| 1   | 6.27        | n.a. | 94.458    | 23.275         | 49.83      | n.a.  | BMB  |
| 2   | 7.62        | n.a. | 81.725    | 23.435         | 50.17      | n.a.  | BMB* |
| 总和: |             |      | 176.183   | 46.710         | 100.00     | 0.000 |      |

Enantioenriched **3lc**

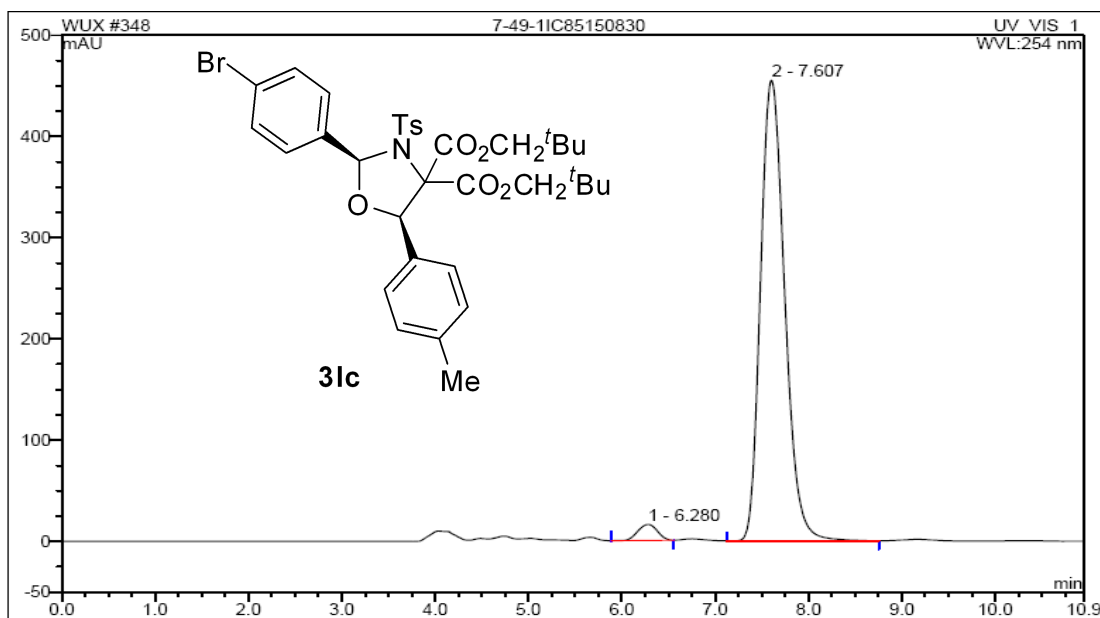

| 序号  | 保留时间<br>min | 峰名称  | 峰高<br>mAU | 峰面积<br>mAU*min | 相对峰面积<br>% | 样品量   | 类型  |
|-----|-------------|------|-----------|----------------|------------|-------|-----|
| 1   | 6.28        | n.a. | 15.647    | 3.766          | 2.68       | n.a.  | BMB |
| 2   | 7.61        | n.a. | 454.907   | 136.778        | 97.32      | n.a.  | BMB |
| 总和: |             |      | 470.554   | 140.544        | 100.00     | 0.000 |     |

**3mc** HPLC using an IC (*n*-Hexane/*i*PrOH=85/15, flow rate 0.8 ml/min)

Racemic **3mc**

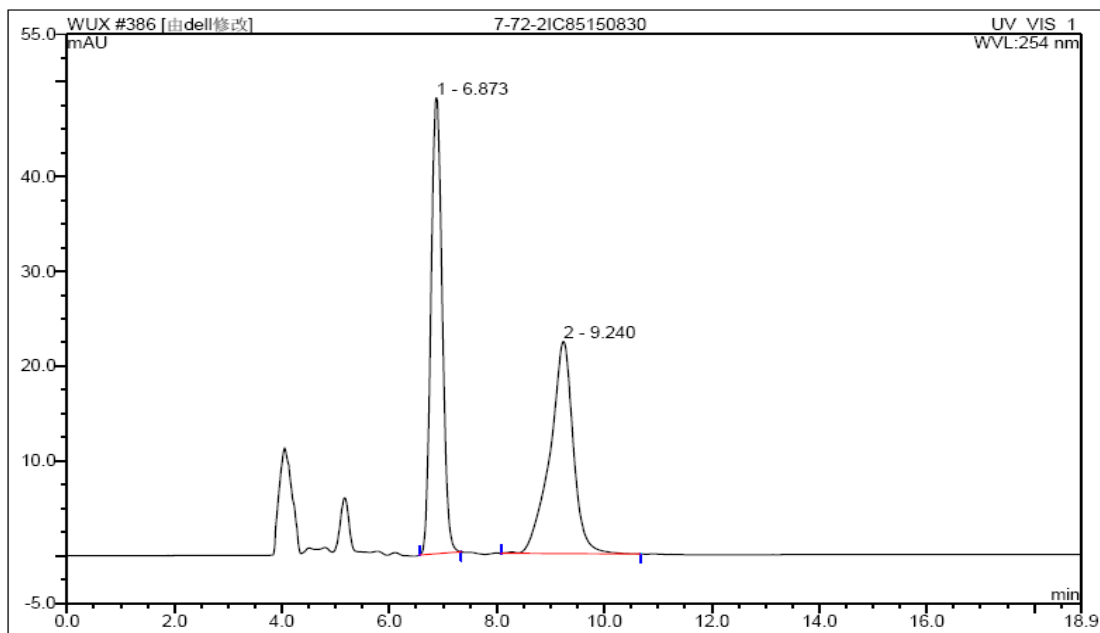

| 序号  | 保留时间<br>min | 峰名称  | 峰高<br>mAU | 峰面积<br>mAU*min | 相对峰面积<br>% | 样品量   | 类型   |
|-----|-------------|------|-----------|----------------|------------|-------|------|
| 1   | 6.87        | n.a. | 48.081    | 11.612         | 50.77      | n.a.  | BMB* |
| 2   | 9.24        | n.a. | 22.375    | 11.260         | 49.23      | n.a.  | BMB* |
| 总和: |             |      | 70.456    | 22.873         | 100.00     | 0.000 |      |

Enantioenriched **3mc**

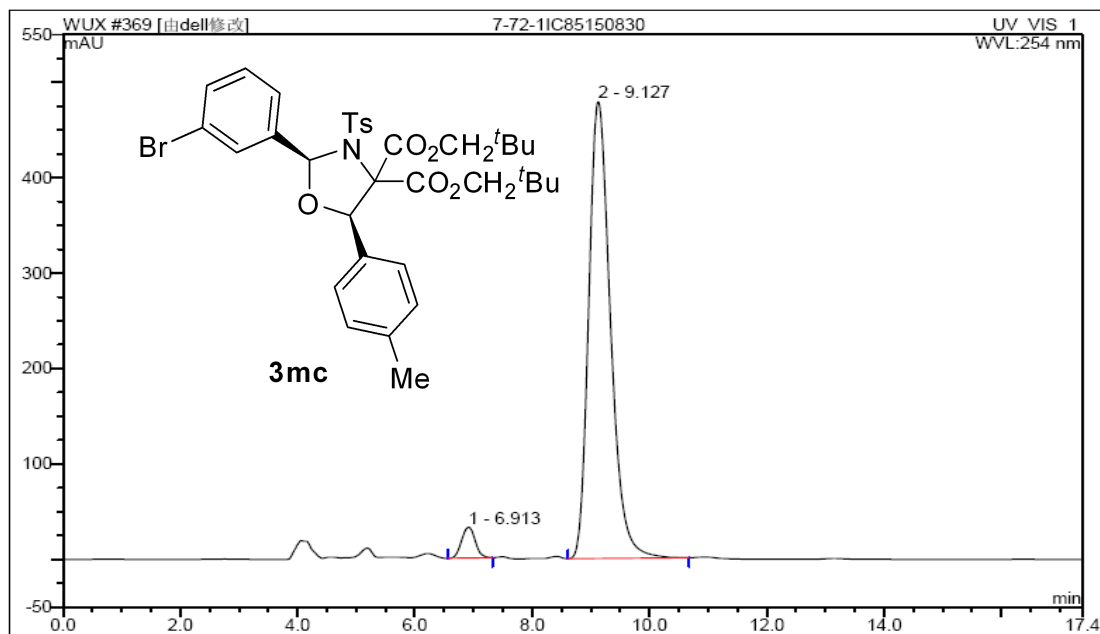

| 序号  | 保留时间<br>min | 峰名称  | 峰高<br>mAU | 峰面积<br>mAU*min | 相对峰面积<br>% | 样品量   | 类型  |
|-----|-------------|------|-----------|----------------|------------|-------|-----|
| 1   | 6.91        | n.a. | 32.321    | 8.709          | 4.07       | n.a.  | BMB |
| 2   | 9.13        | n.a. | 478.816   | 205.228        | 95.93      | n.a.  | BMB |
| 总和: |             |      | 511.137   | 213.937        | 100.00     | 0.000 |     |

**3nc** HPLC using an IC (*n*-Hexane/*i*PrOH=90/10, flow rate 0.8 ml/min)

Racemic **3nc**

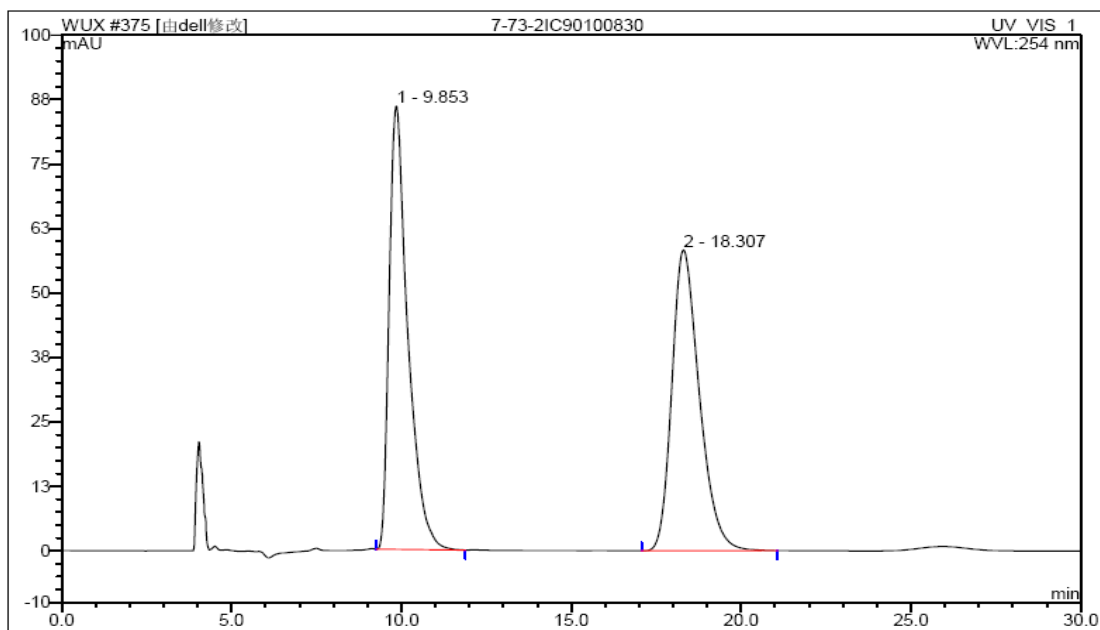

| 序号  | 保留时间<br>min | 峰名称  | 峰高<br>mAU | 峰面积<br>mAU*min | 相对峰面积<br>% | 样品量   | 类型  |
|-----|-------------|------|-----------|----------------|------------|-------|-----|
| 1   | 9.85        | n.a. | 85.946    | 54.658         | 49.97      | n.a.  | BMB |
| 2   | 18.31       | n.a. | 58.317    | 54.717         | 50.03      | n.a.  | BMB |
| 总和: |             |      | 144.263   | 109.375        | 100.00     | 0.000 |     |

Enantioenriched **3nc**

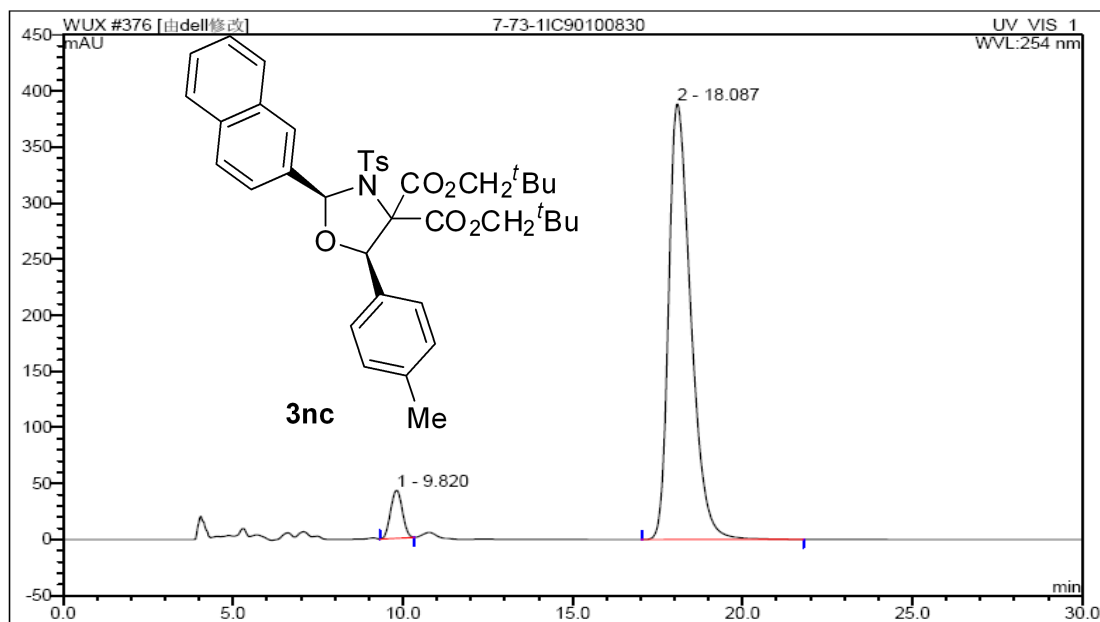

| 序号  | 保留时间<br>min | 峰名称  | 峰高<br>mAU | 峰面积<br>mAU*min | 相对峰面积<br>% | 样品量   | 类型   |
|-----|-------------|------|-----------|----------------|------------|-------|------|
| 1   | 9.82        | n.a. | 42.732    | 17.184         | 5.55       | n.a.  | BMB* |
| 2   | 18.09       | n.a. | 388.248   | 292.681        | 94.45      | n.a.  | BMB  |
| 总和: |             |      | 430.981   | 309.865        | 100.00     | 0.000 |      |

**3oc** HPLC using an IC (*n*-Hexane/*i*PrOH=85/15, flow rate 0.8 ml/min)

Racemic **3oc**

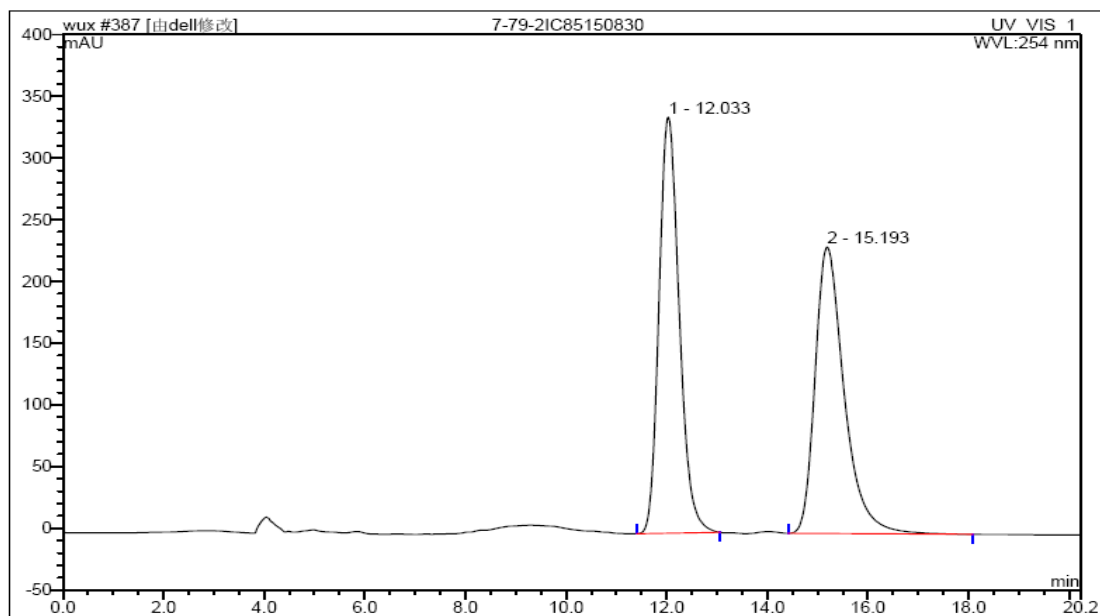

| 序号  | 保留时间<br>min | 峰名称  | 峰高<br>mAU | 峰面积<br>mAU*min | 相对峰面积<br>% | 样品量   | 类型   |
|-----|-------------|------|-----------|----------------|------------|-------|------|
| 1   | 12.03       | n.a. | 337.149   | 157.316        | 50.30      | n.a.  | BMB* |
| 2   | 15.19       | n.a. | 232.032   | 155.428        | 49.70      | n.a.  | BMB  |
| 总和: |             |      | 569.181   | 312.744        | 100.00     | 0.000 |      |

Enantioenriched **3oc**

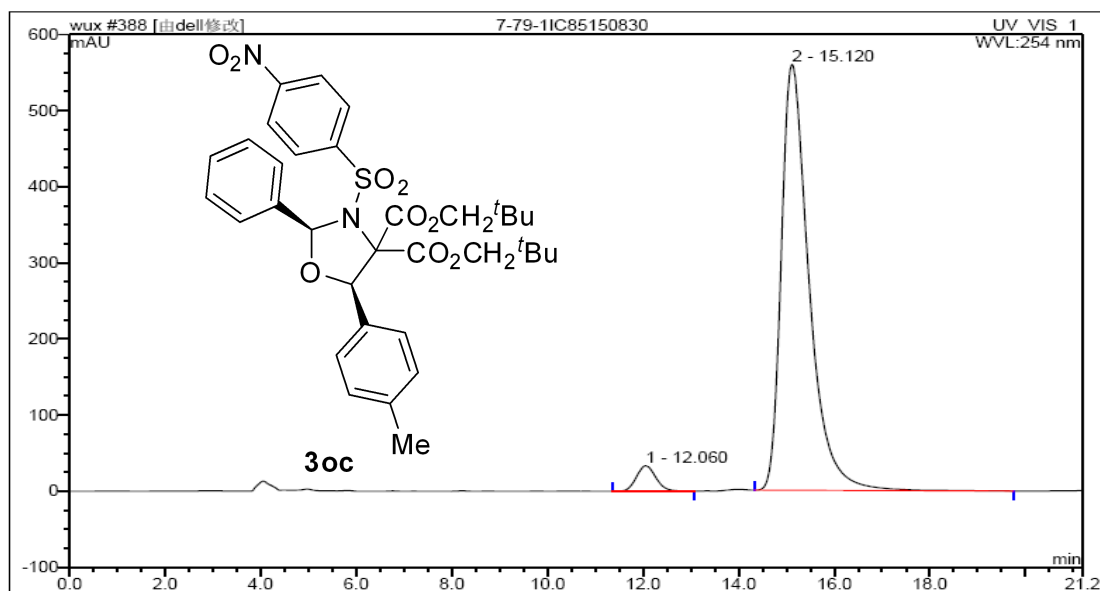

| 序号  | 保留时间<br>min | 峰名称  | 峰高<br>mAU | 峰面积<br>mAU*min | 相对峰面积<br>% | 样品量   | 类型  |
|-----|-------------|------|-----------|----------------|------------|-------|-----|
| 1   | 12.06       | n.a. | 33.453    | 15.803         | 4.03       | n.a.  | BMB |
| 2   | 15.12       | n.a. | 559.387   | 376.788        | 95.97      | n.a.  | BMB |
| 总和: |             |      | 592.839   | 392.592        | 100.00     | 0.000 |     |



**3fa** HPLC using an ADH (*n*-Hexane/*i*PrOH=80/20, flow rate 0.8 ml/min)

Racemic **3fa**

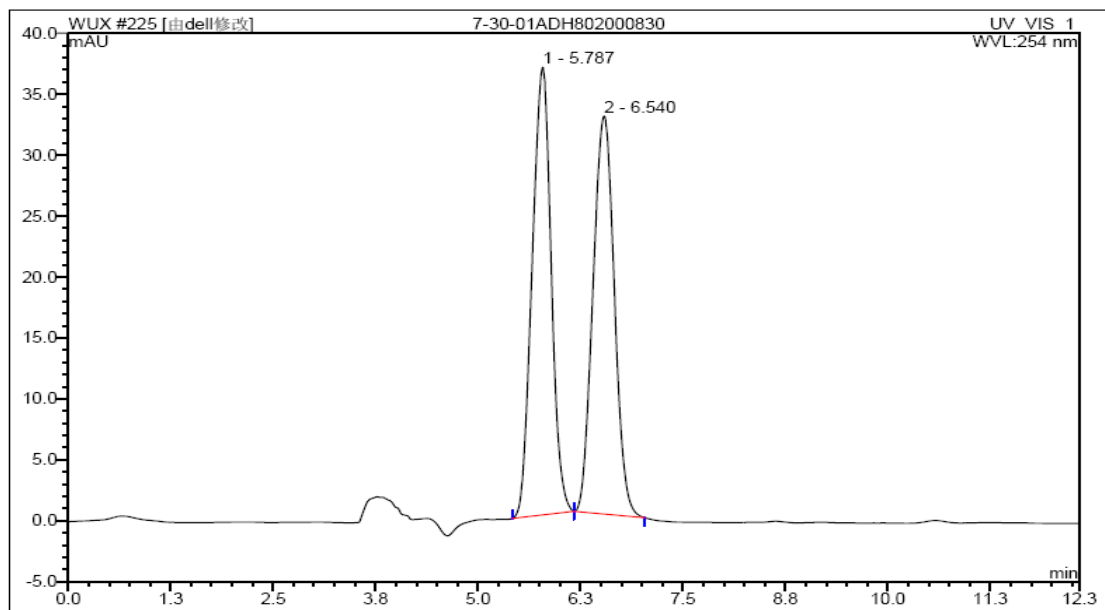

| 序号  | 保留时间<br>min | 峰名称  | 峰高<br>mAU | 峰面积<br>mAU*min | 相对峰面积<br>% | 样品量   | 类型   |
|-----|-------------|------|-----------|----------------|------------|-------|------|
| 1   | 5.79        | n.a. | 36.746    | 9.879          | 50.06      | n.a.  | BMb* |
| 2   | 6.54        | n.a. | 32.667    | 9.854          | 49.94      | n.a.  | bMB* |
| 总和: |             |      | 69.412    | 19.733         | 100.00     | 0.000 |      |

Enantioenriched **3fa**

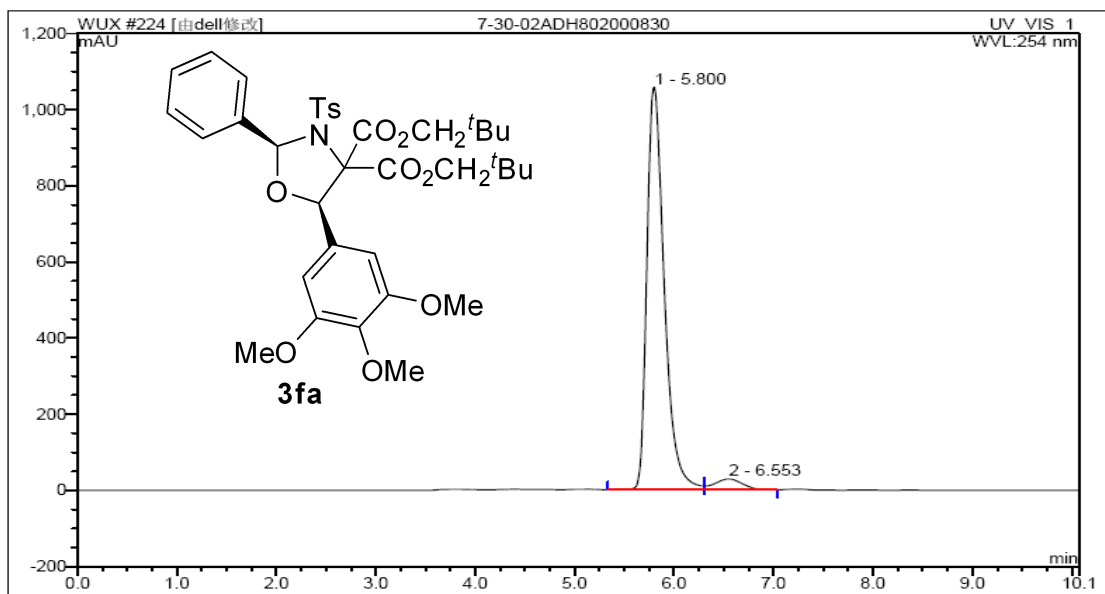

| 序号  | 保留时间<br>min | 峰名称  | 峰高<br>mAU | 峰面积<br>mAU*min | 相对峰面积<br>% | 样品量   | 类型  |
|-----|-------------|------|-----------|----------------|------------|-------|-----|
| 1   | 5.80        | n.a. | 1057.830  | 214.525        | 95.90      | n.a.  | BM* |
| 2   | 6.55        | n.a. | 28.348    | 9.166          | 4.10       | n.a.  | MB* |
| 总和: |             |      | 1086.178  | 223.691        | 100.00     | 0.000 |     |

**3fb** HPLC using an IC (*n*-Hexane/*i*PrOH=85/15, flow rate 0.8 ml/min)

Racemic **3fb**

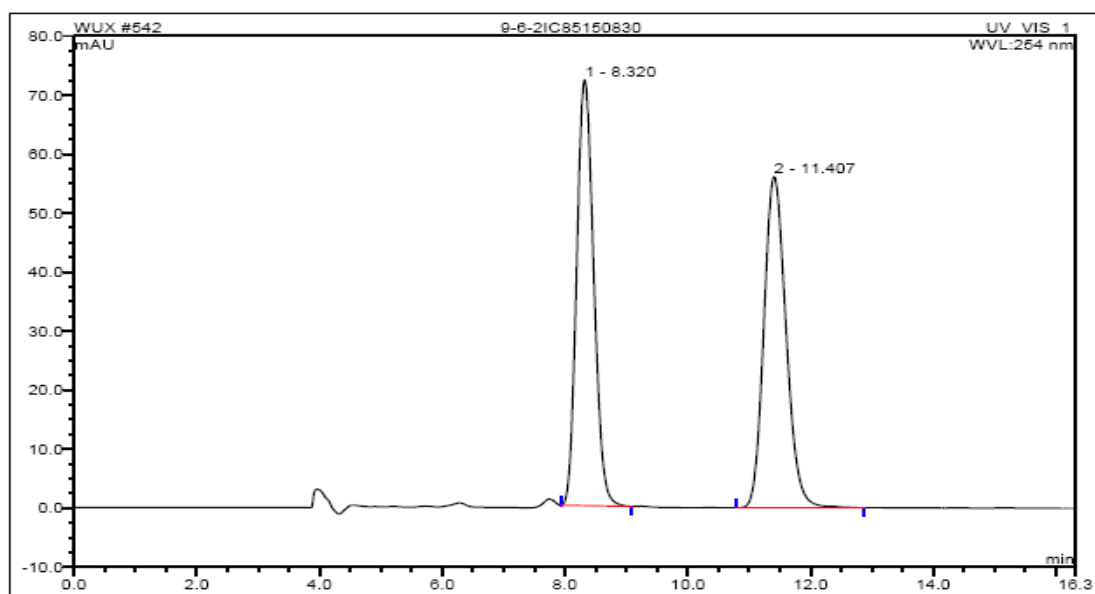

| 序号  | 保留时间<br>min | 峰名称  | 峰高<br>mAU | 峰面积<br>mAU*min | 相对峰面积<br>% | 样品量   | 类型  |
|-----|-------------|------|-----------|----------------|------------|-------|-----|
| 1   | 8.32        | n.a. | 72.186    | 23.156         | 49.65      | n.a.  | BMB |
| 2   | 11.41       | n.a. | 56.092    | 23.478         | 50.35      | n.a.  | BMB |
| 总和: |             |      | 128.277   | 46.634         | 100.00     | 0.000 |     |

Enantioenriched **3fb**

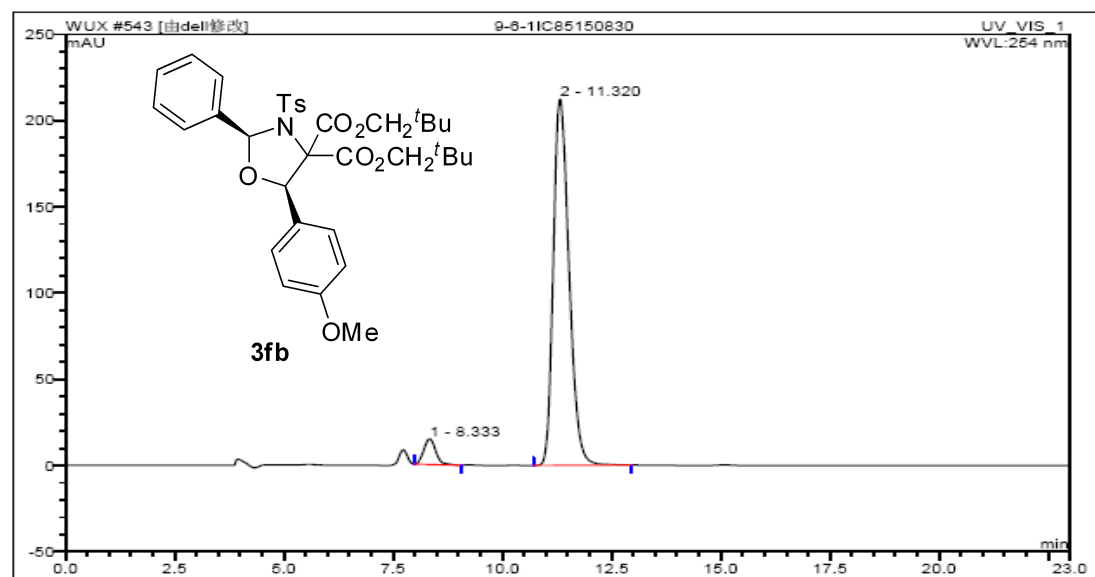

| 序号  | 保留时间<br>min | 峰名称  | 峰高<br>mAU | 峰面积<br>mAU*min | 相对峰面积<br>% | 样品量   | 类型   |
|-----|-------------|------|-----------|----------------|------------|-------|------|
| 1   | 8.33        | n.a. | 14.930    | 4.780          | 5.12       | n.a.  | BMB* |
| 2   | 11.32       | n.a. | 212.385   | 88.634         | 94.88      | n.a.  | BMB  |
| 总和: |             |      | 227.315   | 93.413         | 100.00     | 0.000 |      |

**3fd** HPLC using an OZ3 (*n*-Hexane/*i*PrOH=85/15, flow rate 0.8 ml/min)

Racemic **3fd**

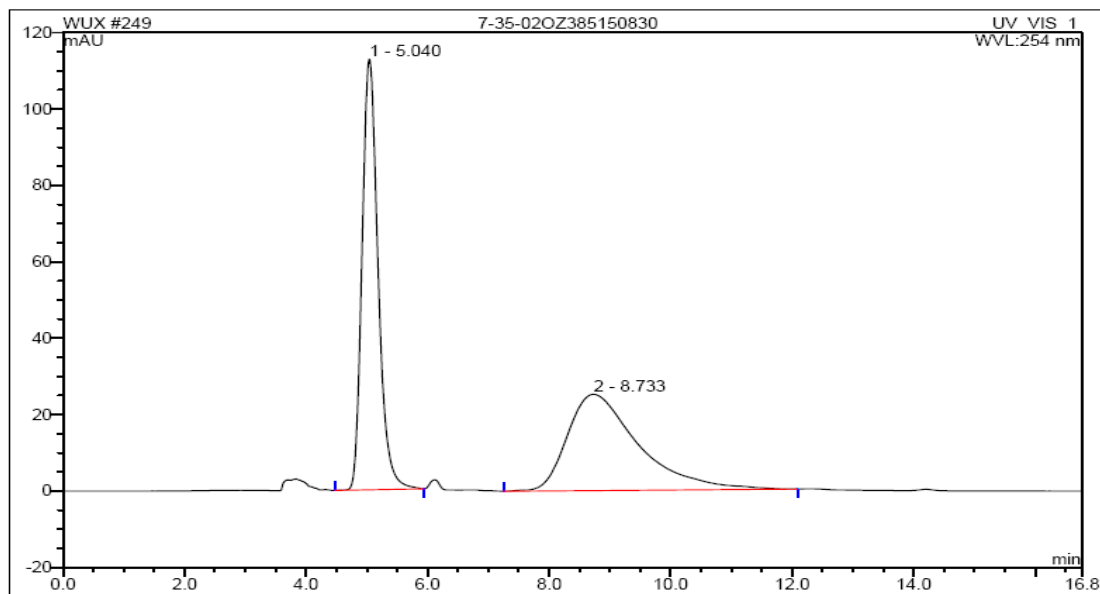

| 序号  | 保留时间<br>min | 峰名称  | 峰高<br>mAU | 峰面积<br>mAU*min | 相对峰面积<br>% | 样品量   | 类型  |
|-----|-------------|------|-----------|----------------|------------|-------|-----|
| 1   | 5.04        | n.a. | 112.708   | 34.352         | 50.17      | n.a.  | BMB |
| 2   | 8.73        | n.a. | 25.214    | 34.121         | 49.83      | n.a.  | BMB |
| 总和: |             |      | 137.922   | 68.473         | 100.00     | 0.000 |     |

Enantioenriched **3fd**

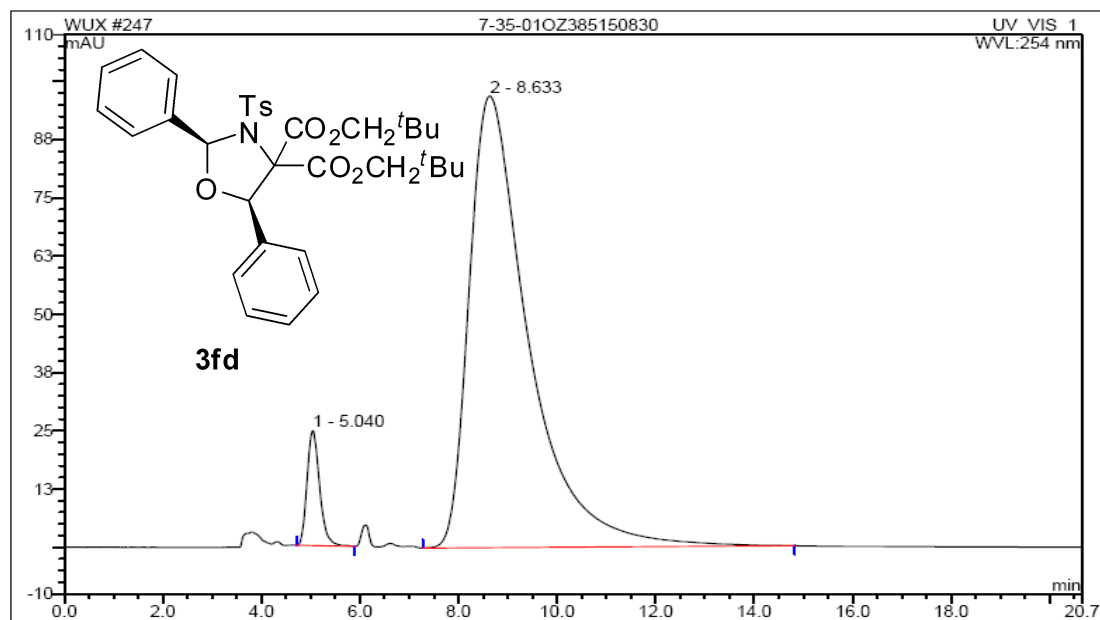

| 序号  | 保留时间<br>min | 峰名称  | 峰高<br>mAU | 峰面积<br>mAU*min | 相对峰面积<br>% | 样品量   | 类型  |
|-----|-------------|------|-----------|----------------|------------|-------|-----|
| 1   | 5.04        | n.a. | 24.650    | 7.295          | 5.12       | n.a.  | BMB |
| 2   | 8.63        | n.a. | 96.911    | 135.255        | 94.88      | n.a.  | BMB |
| 总和: |             |      | 121.561   | 142.549        | 100.00     | 0.000 |     |

**3fe** HPLC using an IC (*n*-Hexane/*i*PrOH=85/15, flow rate 0.8 ml/min)

Racemic **3fe**

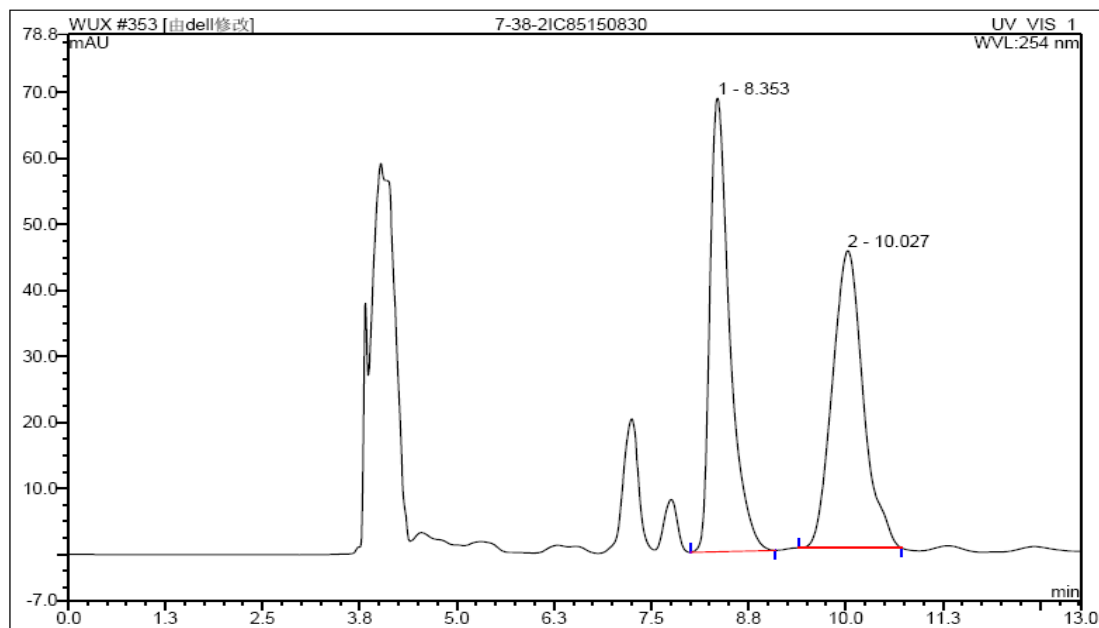

| 序号  | 保留时间<br>min | 峰名称  | 峰高<br>mAU | 峰面积<br>mAU*min | 相对峰面积<br>% | 样品量   | 类型   |
|-----|-------------|------|-----------|----------------|------------|-------|------|
| 1   | 8.35        | n.a. | 68.742    | 20.325         | 49.51      | n.a.  | BMB* |
| 2   | 10.03       | n.a. | 45.002    | 20.731         | 50.49      | n.a.  | BMB* |
| 总和: |             |      | 113.744   | 41.056         | 100.00     | 0.000 |      |

Enantioenriched **3fe**

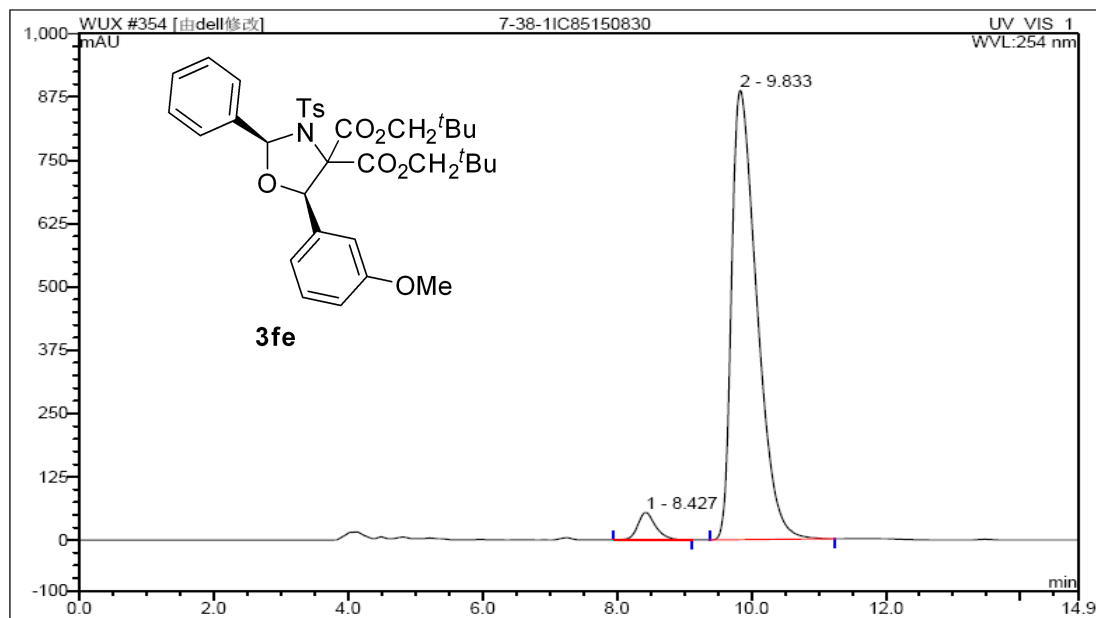

| 序号  | 保留时间<br>min | 峰名称  | 峰高<br>mAU | 峰面积<br>mAU*min | 相对峰面积<br>% | 样品量   | 类型   |
|-----|-------------|------|-----------|----------------|------------|-------|------|
| 1   | 8.43        | n.a. | 53.799    | 16.475         | 4.10       | n.a.  | BMB  |
| 2   | 9.83        | n.a. | 886.489   | 385.665        | 95.90      | n.a.  | BMB* |
| 总和: |             |      | 940.288   | 402.140        | 100.00     | 0.000 |      |

**3ff** HPLC using an ADH (*n*-Hexane/*i*PrOH=85/15, flow rate 0.8 ml/min)

Racemic **3ff**

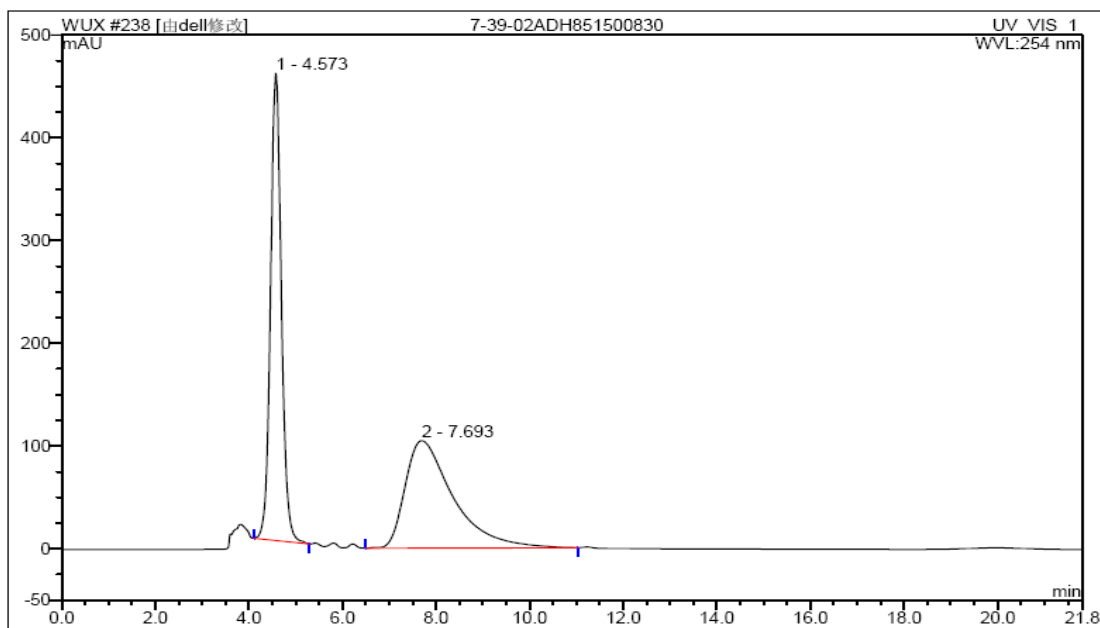

| 序号  | 保留时间<br>min | 峰名称  | 峰高<br>mAU | 峰面积<br>mAU*min | 相对峰面积<br>% | 样品量   | 类型   |
|-----|-------------|------|-----------|----------------|------------|-------|------|
| 1   | 4.57        | n.a. | 454.835   | 121.881        | 49.57      | n.a.  | BMB* |
| 2   | 7.69        | n.a. | 104.599   | 124.005        | 50.43      | n.a.  | BMB  |
| 总和: |             |      | 559.435   | 245.886        | 100.00     | 0.000 |      |

Enantioenriched **3ff**

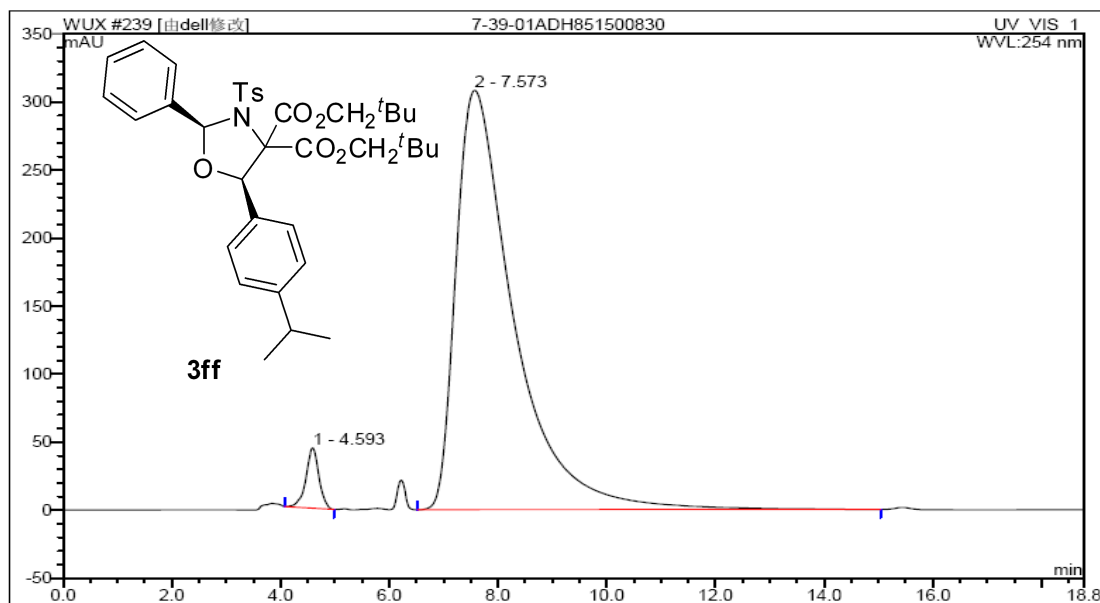

| 序号  | 保留时间<br>min | 峰名称  | 峰高<br>mAU | 峰面积<br>mAU*min | 相对峰面积<br>% | 样品量   | 类型  |
|-----|-------------|------|-----------|----------------|------------|-------|-----|
| 1   | 4.59        | n.a. | 44.396    | 12.320         | 3.14       | n.a.  | BMB |
| 2   | 7.57        | n.a. | 308.252   | 379.579        | 96.86      | n.a.  | BMB |
| 总和: |             |      | 352.647   | 391.899        | 100.00     | 0.000 |     |

### Racemic **3fg**

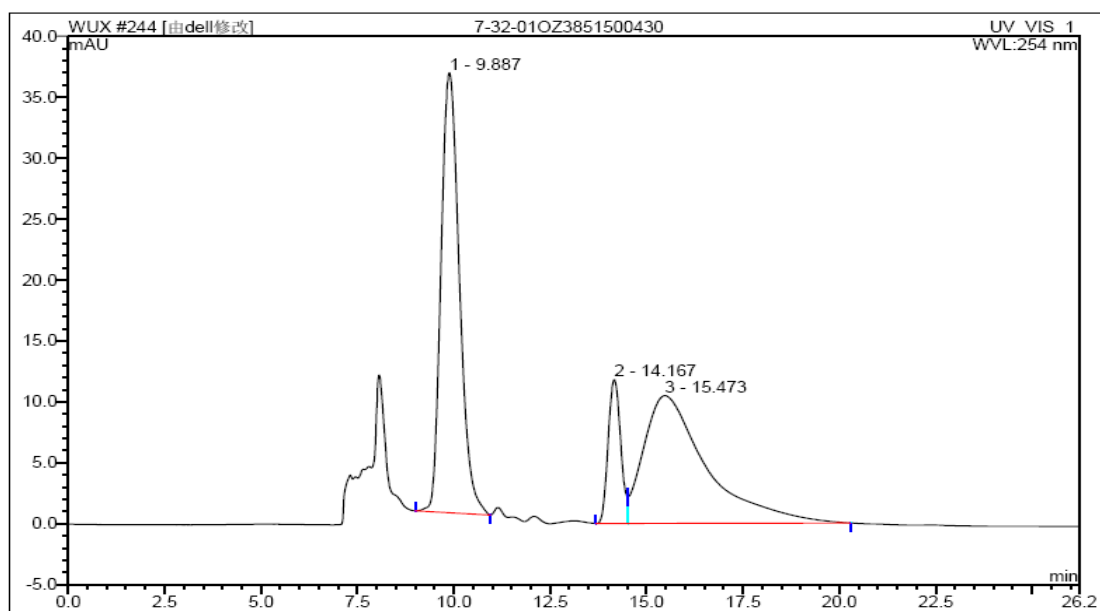

| 序号  | 保留时间<br>min | 峰名称  | 峰高<br>mAU | 峰面积<br>mAU*min | 相对峰面积<br>% | 样品量   | 类型  |
|-----|-------------|------|-----------|----------------|------------|-------|-----|
| 1   | 9.89        | n.a. | 36.121    | 19.964         | 45.18      | n.a.  | BMB |
| 2   | 14.17       | n.a. | 11.816    | 4.474          | 10.13      | n.a.  | BM  |
| 3   | 15.47       | n.a. | 10.488    | 19.747         | 44.69      | n.a.  | MB  |
| 总和: |             |      | 58.425    | 44.186         | 100.00     | 0.000 |     |

### Enantioenriched **3fg**

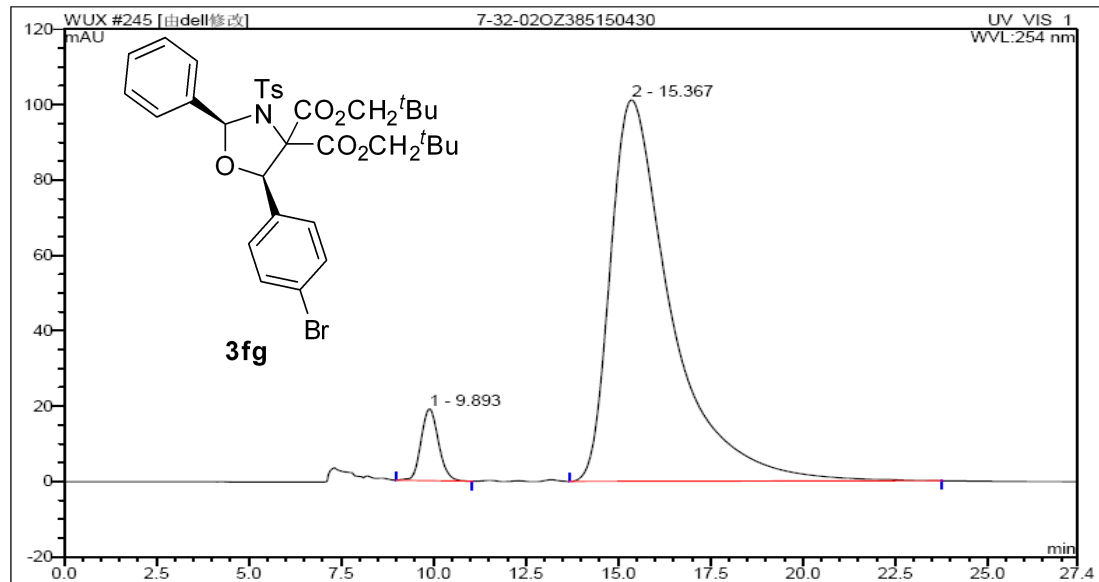

| 序号  | 保留时间<br>min | 峰名称  | 峰高<br>mAU | 峰面积<br>mAU*min | 相对峰面积<br>% | 样品量   | 类型  |
|-----|-------------|------|-----------|----------------|------------|-------|-----|
| 1   | 9.89        | n.a. | 19.027    | 10.459         | 5.14       | n.a.  | BMB |
| 2   | 15.37       | n.a. | 101.182   | 193.140        | 94.86      | n.a.  | BMB |
| 总和: |             |      | 120.208   | 203.599        | 100.00     | 0.000 |     |

**3fh** HPLC using an IC (*n*-Hexane/*i*PrOH=90/10, flow rate 0.8 ml/min)

Racemic **3fh**

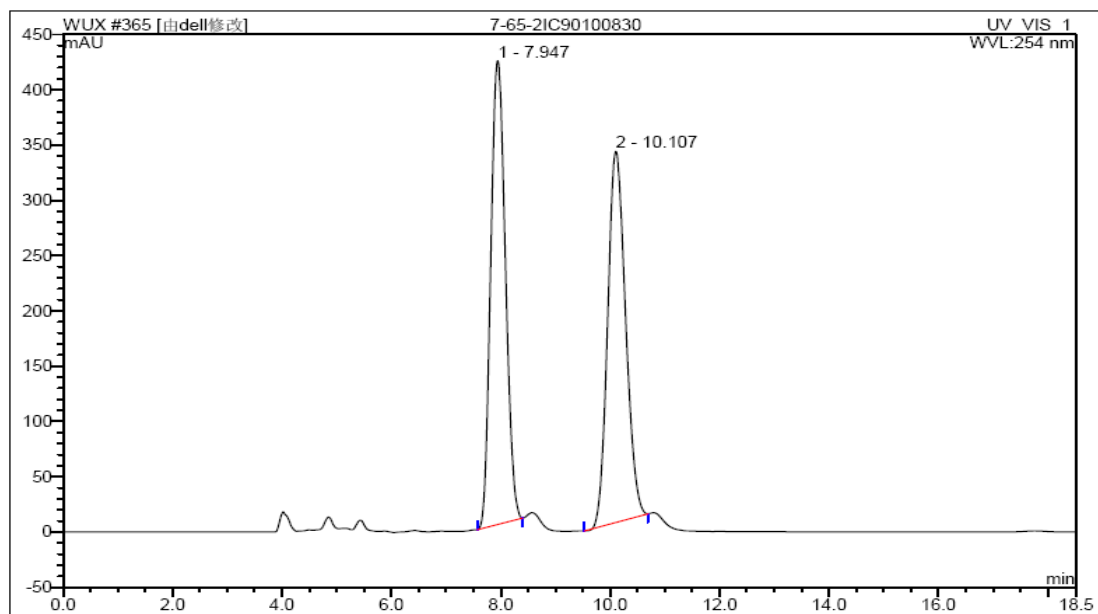

| 序号  | 保留时间<br>min | 峰名称  | 峰高<br>mAU | 峰面积<br>mAU*min | 相对峰面积<br>% | 样品量   | 类型   |
|-----|-------------|------|-----------|----------------|------------|-------|------|
| 1   | 7.95        | n.a. | 419.300   | 130.090        | 50.64      | n.a.  | BMB* |
| 2   | 10.11       | n.a. | 335.580   | 126.823        | 49.36      | n.a.  | BMB* |
| 总和: |             |      | 754.880   | 256.913        | 100.00     | 0.000 |      |

Enantioenriched **3fh**

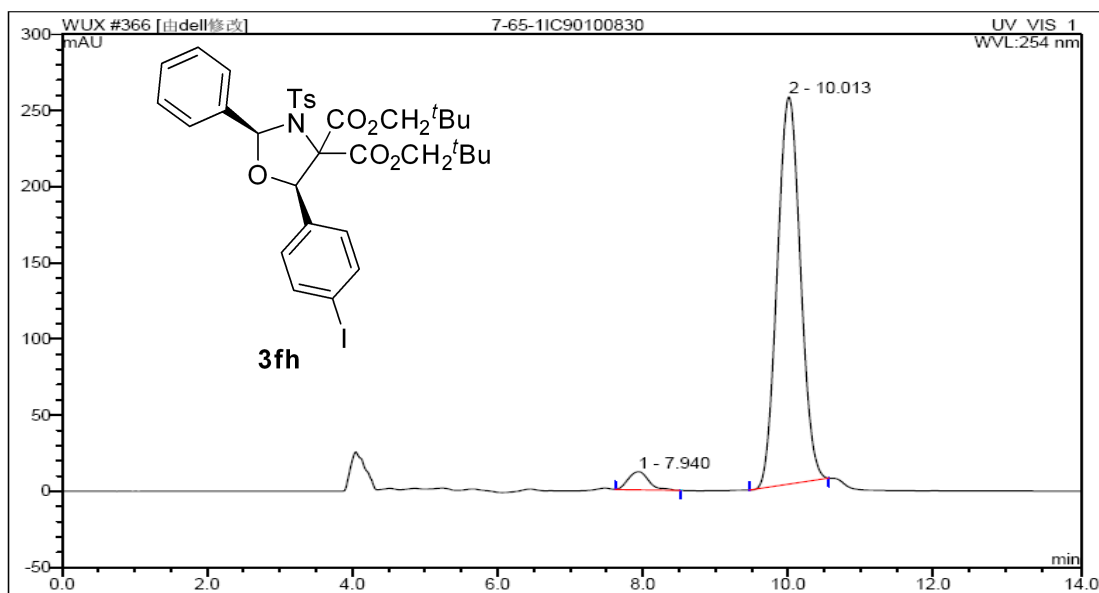

| 序号  | 保留时间<br>min | 峰名称  | 峰高<br>mAU | 峰面积<br>mAU*min | 相对峰面积<br>% | 样品量   | 类型   |
|-----|-------------|------|-----------|----------------|------------|-------|------|
| 1   | 7.94        | n.a. | 11.910    | 3.887          | 3.97       | n.a.  | BMB  |
| 2   | 10.01       | n.a. | 254.307   | 93.926         | 96.03      | n.a.  | BMB* |
| 总和: |             |      | 266.217   | 97.813         | 100.00     | 0.000 |      |

**3fi** HPLC using an OZ3 (*n*-Hexane/*i*PrOH=85/15, flow rate 0.8 ml/min)

Racemic **3fi**

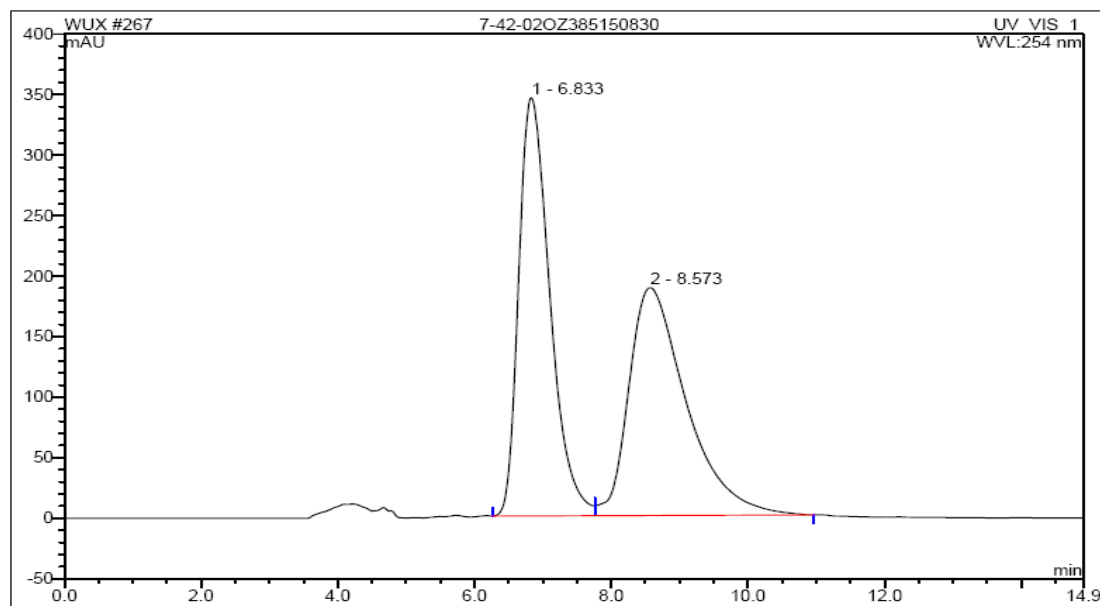

| 序号  | 保留时间<br>min | 峰名称  | 峰高<br>mAU | 峰面积<br>mAU*min | 相对峰面积<br>% | 样品量   | 类型 |
|-----|-------------|------|-----------|----------------|------------|-------|----|
| 1   | 6.83        | n.a. | 345.397   | 182.877        | 49.96      | n.a.  | BM |
| 2   | 8.57        | n.a. | 188.268   | 183.184        | 50.04      | n.a.  | MB |
| 总和: |             |      | 533.665   | 366.061        | 100.00     | 0.000 |    |

Enantioenriched **3fi**

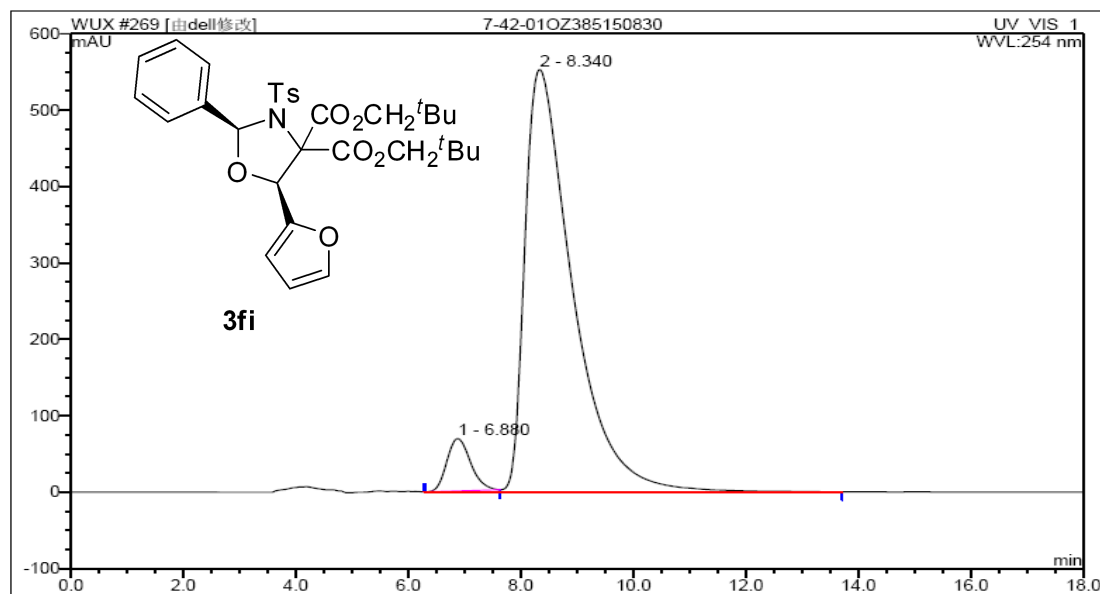

| 序号  | 保留时间<br>min | 峰名称  | 峰高<br>mAU | 峰面积<br>mAU*min | 相对峰面积<br>% | 样品量   | 类型  |
|-----|-------------|------|-----------|----------------|------------|-------|-----|
| 1   | 6.88        | n.a. | 68.424    | 33.384         | 5.80       | n.a.  | Ru  |
| 2   | 8.34        | n.a. | 552.554   | 542.298        | 94.20      | n.a.  | BMB |
| 总和: |             |      | 620.978   | 575.682        | 100.00     | 0.000 |     |



**3fj** HPLC using an ADH (*n*-Hexane/*i*PrOH=90/10, flow rate 0.5 ml/min)

Racemic **3fj**

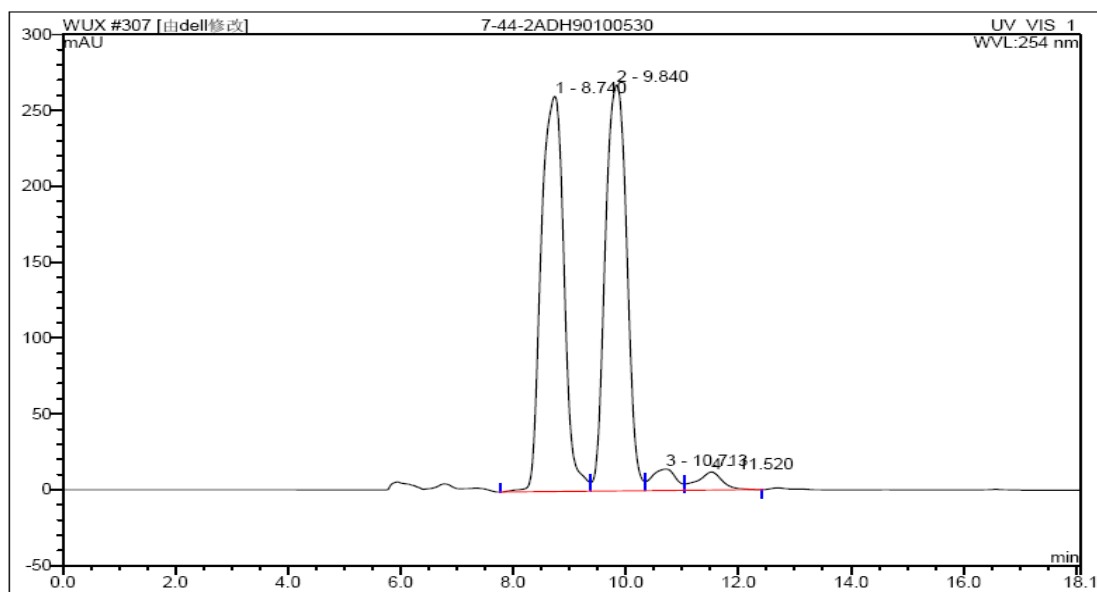

| 序号  | 保留时间<br>min | 峰名称  | 峰高<br>mAU | 峰面积<br>mAU*min | 相对峰面积<br>% | 样品量   | 类型 |
|-----|-------------|------|-----------|----------------|------------|-------|----|
| 1   | 8.74        | n.a. | 260.552   | 122.251        | 48.14      | n.a.  | BM |
| 2   | 9.84        | n.a. | 267.552   | 118.524        | 46.68      | n.a.  | M  |
| 3   | 10.71       | n.a. | 14.155    | 6.932          | 2.73       | n.a.  | M  |
| 4   | 11.52       | n.a. | 11.922    | 6.226          | 2.45       | n.a.  | MB |
| 总和: |             |      | 554.181   | 253.933        | 100.00     | 0.000 |    |

Enantioenriched **3fj**

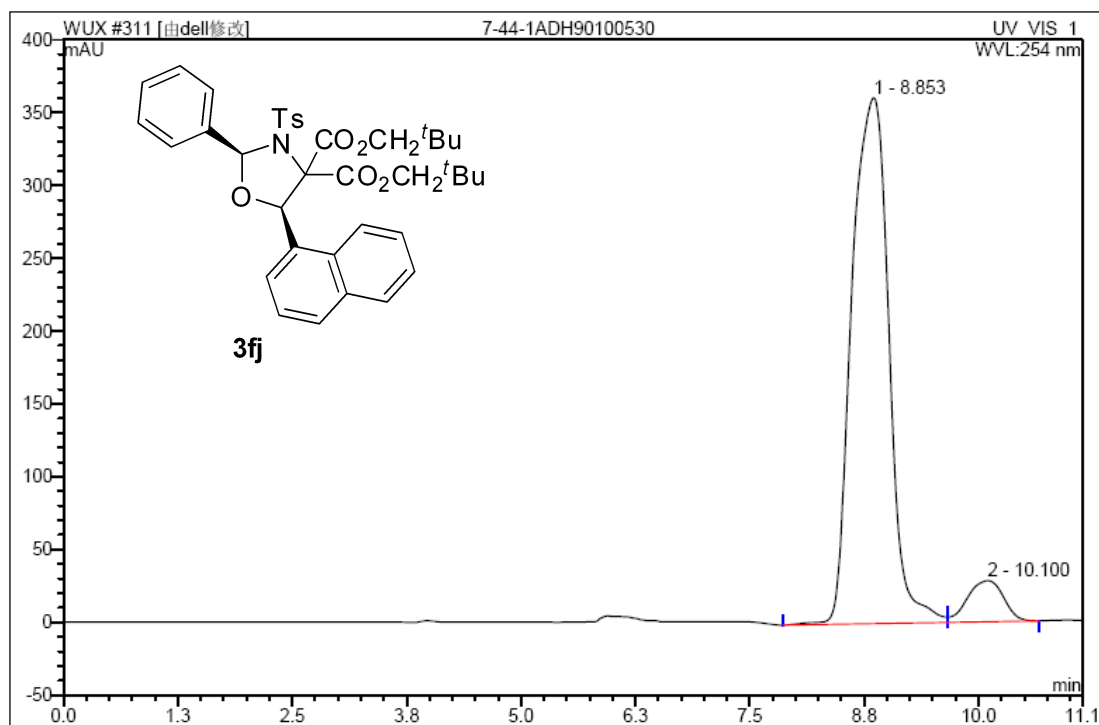

| 序号  | 保留时间<br>min | 峰名称  | 峰高<br>mAU | 峰面积<br>mAU*min | 相对峰面积<br>% | 样品量   | 类型 |
|-----|-------------|------|-----------|----------------|------------|-------|----|
| 1   | 8.85        | n.a. | 360.990   | 168.852        | 92.95      | n.a.  | BM |
| 2   | 10.10       | n.a. | 28.056    | 12.797         | 7.05       | n.a.  | MB |
| 总和: |             |      | 389.046   | 181.650        | 100.00     | 0.000 |    |

**3fk** HPLC using an OZ3 (*n*-Hexane/*i*PrOH=85/15, flow rate 0.8 ml/min)

Racemic **3fk**

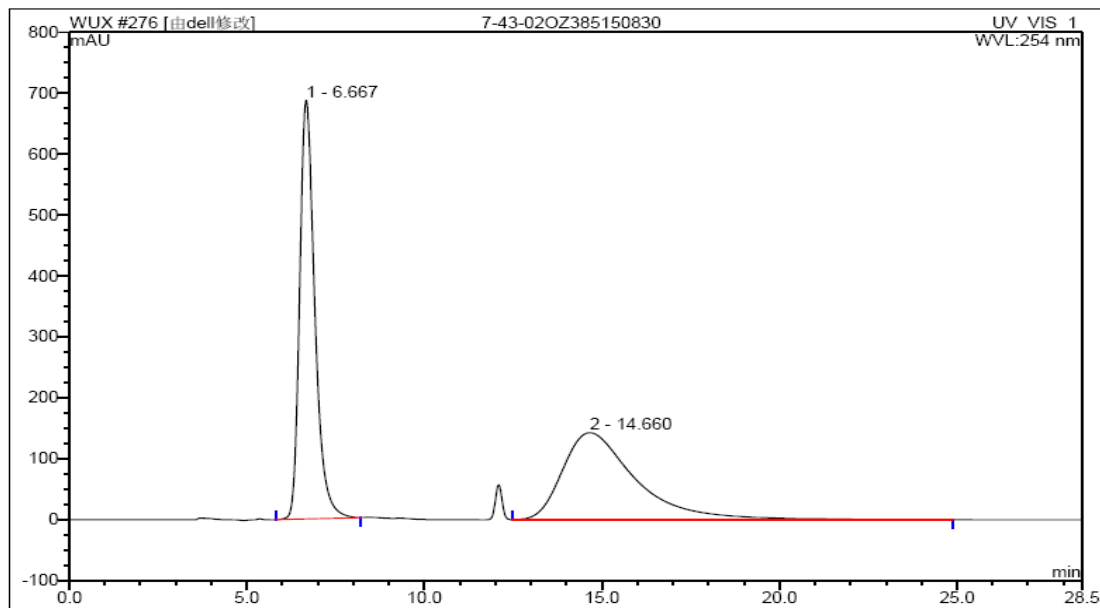

| 序号  | 保留时间<br>min | 峰名称  | 峰高<br>mAU | 峰面积<br>mAU*min | 相对峰面积<br>% | 样品量   | 类型   |
|-----|-------------|------|-----------|----------------|------------|-------|------|
| 1   | 6.67        | n.a. | 687.213   | 339.847        | 50.05      | n.a.  | BMB  |
| 2   | 14.66       | n.a. | 142.715   | 339.218        | 49.95      | n.a.  | BMB* |
| 总和: |             |      | 829.928   | 679.065        | 100.00     | 0.000 |      |

Enantioenriched **3fk**

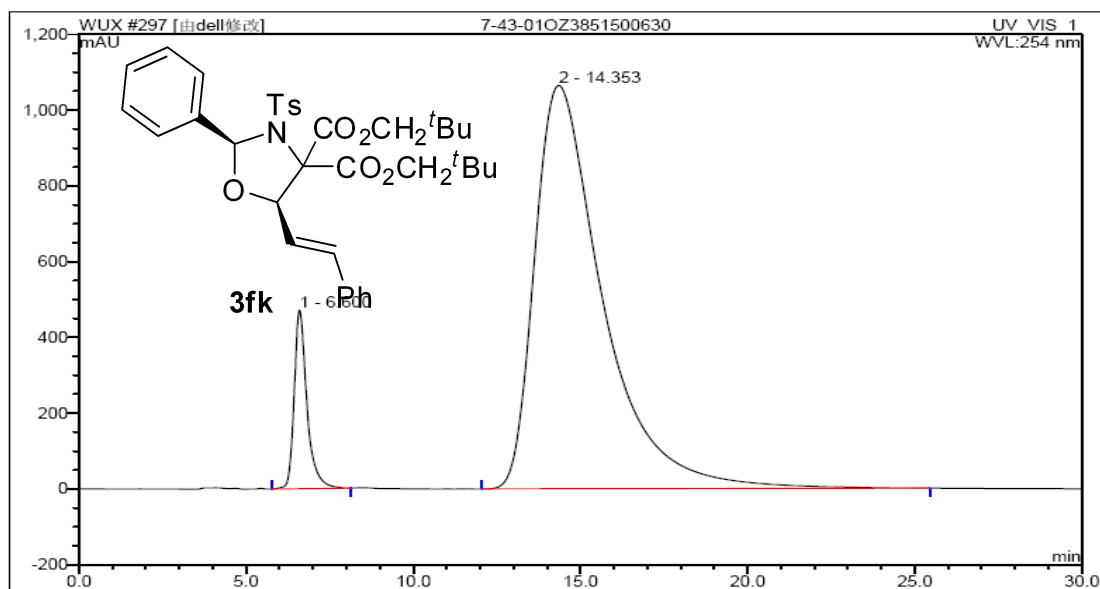

| 序号  | 保留时间<br>min | 峰名称  | 峰高<br>mAU | 峰面积<br>mAU*min | 相对峰面积<br>% | 样品量   | 类型   |
|-----|-------------|------|-----------|----------------|------------|-------|------|
| 1   | 6.60        | n.a. | 471.128   | 208.184        | 7.65       | n.a.  | BMB  |
| 2   | 14.35       | n.a. | 1064.687  | 2511.500       | 92.35      | n.a.  | BMB* |
| 总和: |             |      | 1535.815  | 2719.684       | 100.00     | 0.000 |      |

**3fl** HPLC using an IC (*n*-Hexane/*i*PrOH=95/05, flow rate 0.8 ml/min)

Racemic **3fl**

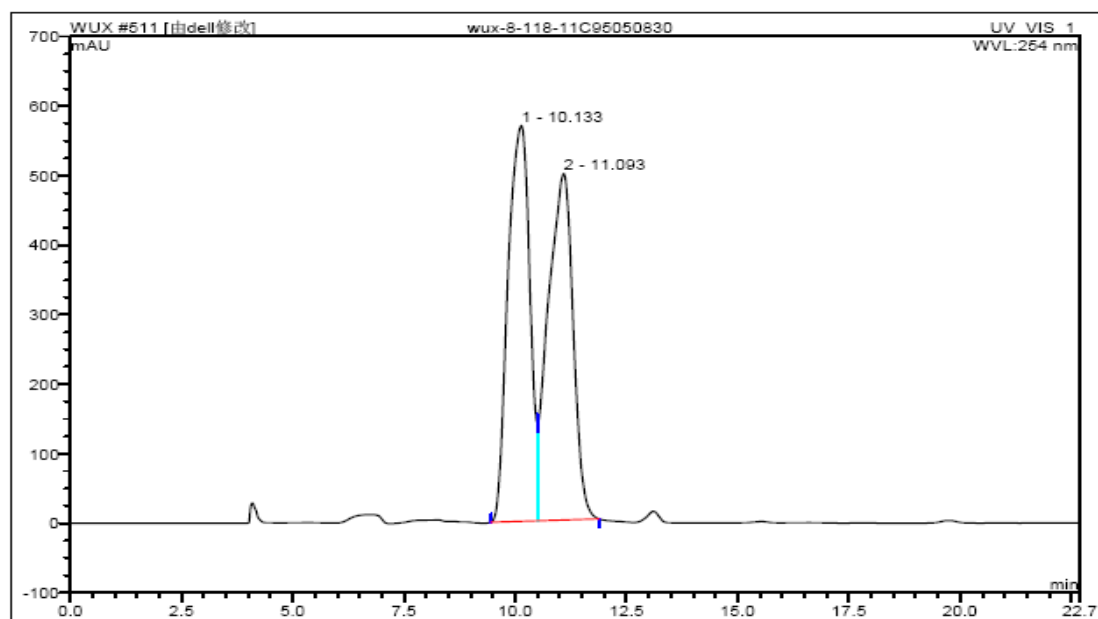

| 序号  | 保留时间<br>min | 峰名称  | 峰高<br>mAU | 峰面积<br>mAU*min | 相对峰面积<br>% | 样品量   | 类型   |
|-----|-------------|------|-----------|----------------|------------|-------|------|
| 1   | 10.13       | n.a. | 569.122   | 322.020        | 49.83      | n.a.  | BM * |
| 2   | 11.09       | n.a. | 497.983   | 324.268        | 50.17      | n.a.  | MB*  |
| 总和: |             |      | 1067.105  | 646.289        | 100.00     | 0.000 |      |

Enantioenriched **3fl**

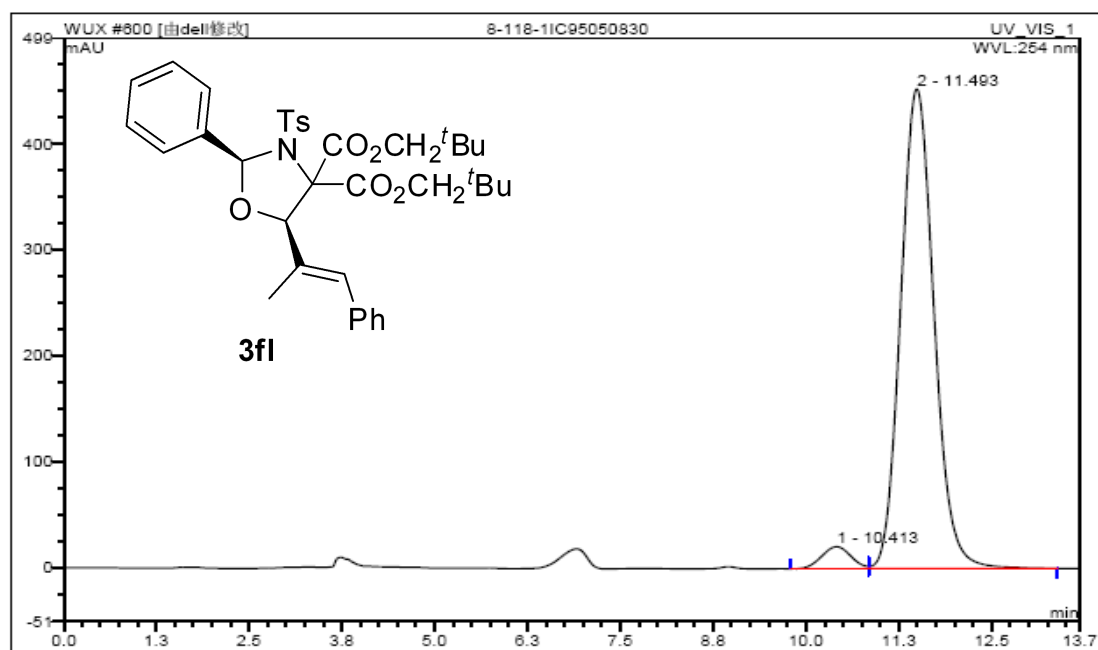

| 序号  | 保留时间<br>min | 峰名称  | 峰高<br>mAU | 峰面积<br>mAU*min | 相对峰面积<br>% | 样品量   | 类型 |
|-----|-------------|------|-----------|----------------|------------|-------|----|
| 1   | 10.41       | n.a. | 20.858    | 9.570          | 3.92       | n.a.  | BM |
| 2   | 11.49       | n.a. | 452.406   | 234.846        | 96.08      | n.a.  | MB |
| 总和: |             |      | 473.263   | 244.416        | 100.00     | 0.000 |    |

**3fm** HPLC using an IC (*n*-Hexane/*i*PrOH=85/15, flow rate 0.8 ml/min)

Racemic **3fm**

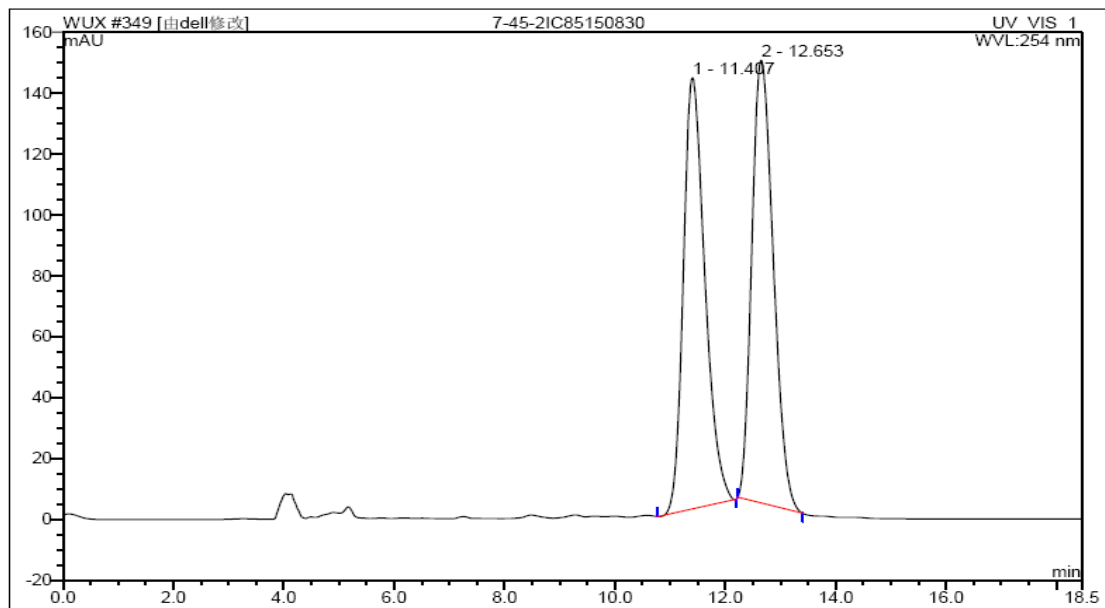

| 序号  | 保留时间<br>min | 峰名称  | 峰高<br>mAU | 峰面积<br>mAU*min | 相对峰面积<br>% | 样品量   | 类型   |
|-----|-------------|------|-----------|----------------|------------|-------|------|
| 1   | 11.41       | n.a. | 141.639   | 64.024         | 49.36      | n.a.  | BMB* |
| 2   | 12.65       | n.a. | 145.431   | 65.673         | 50.64      | n.a.  | BMB* |
| 总和: |             |      | 287.070   | 129.698        | 100.00     | 0.000 |      |

Enantioenriched **3fm**

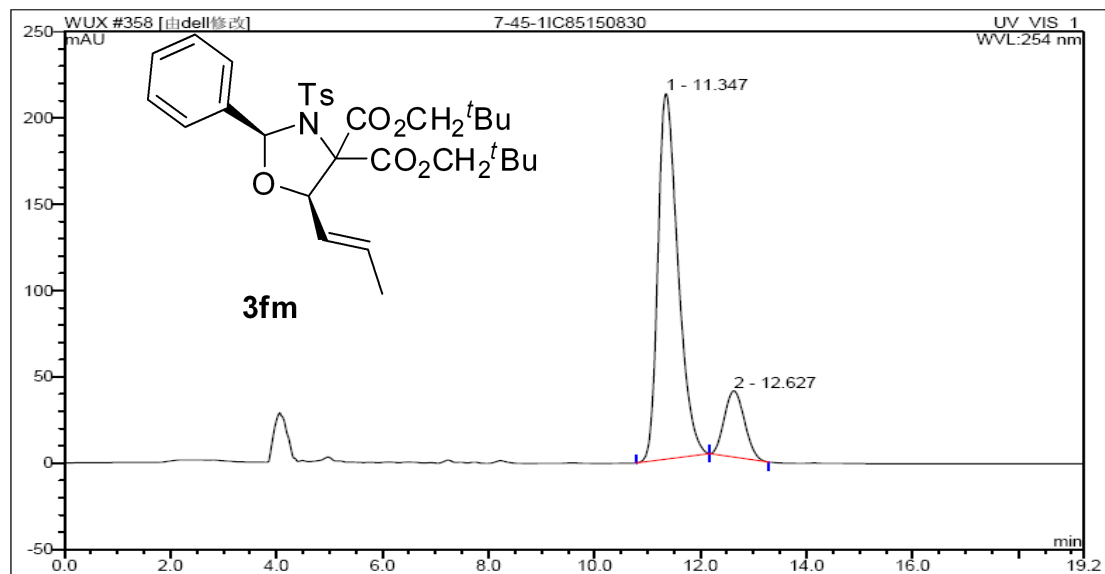

| 序号  | 保留时间<br>min | 峰名称  | 峰高<br>mAU | 峰面积<br>mAU*min | 相对峰面积<br>% | 样品量   | 类型   |
|-----|-------------|------|-----------|----------------|------------|-------|------|
| 1   | 11.35       | n.a. | 211.933   | 93.221         | 84.60      | n.a.  | BMBb |
| 2   | 12.63       | n.a. | 38.393    | 16.964         | 15.40      | n.a.  | bMB  |
| 总和: |             |      | 250.326   | 110.186        | 100.00     | 0.000 |      |

**3fn** HPLC using an IC (*n*-Hexane/*i*PrOH=95/05, flow rate 0.8 ml/min)

Racemic **3fn**

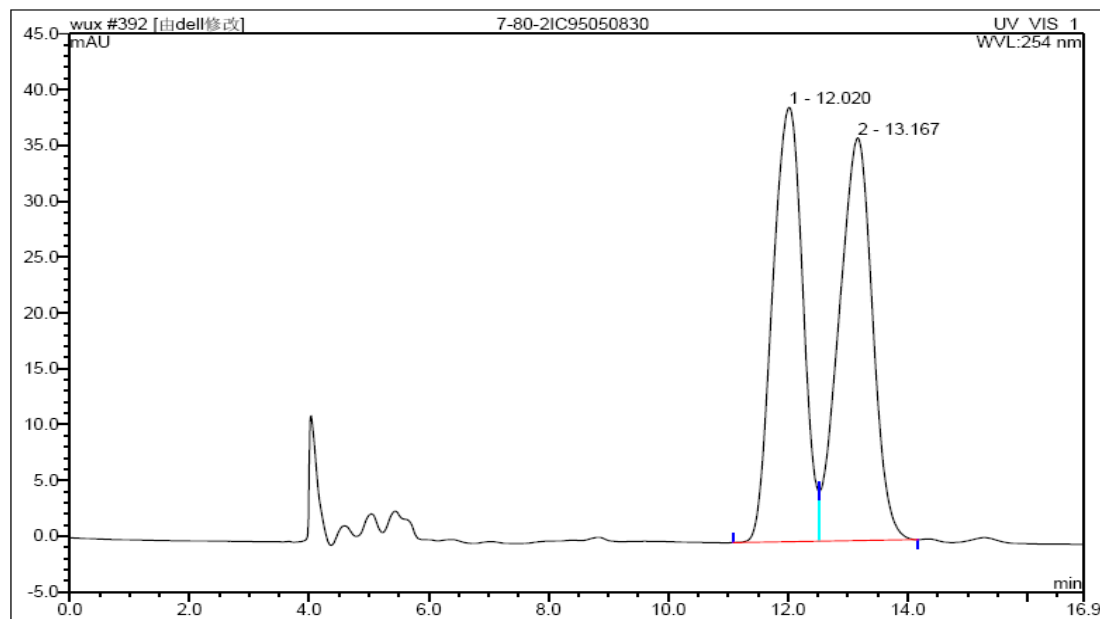

| 序号  | 保留时间<br>min | 峰名称  | 峰高<br>mAU | 峰面积<br>mAU*min | 相对峰面积<br>% | 样品量   | 类型 |
|-----|-------------|------|-----------|----------------|------------|-------|----|
| 1   | 12.02       | n.a. | 38.899    | 22.693         | 49.30      | n.a.  | BM |
| 2   | 13.17       | n.a. | 36.066    | 23.338         | 50.70      | n.a.  | MB |
| 总和: |             |      | 74.965    | 46.031         | 100.00     | 0.000 |    |

Enantioenriched **3fn**

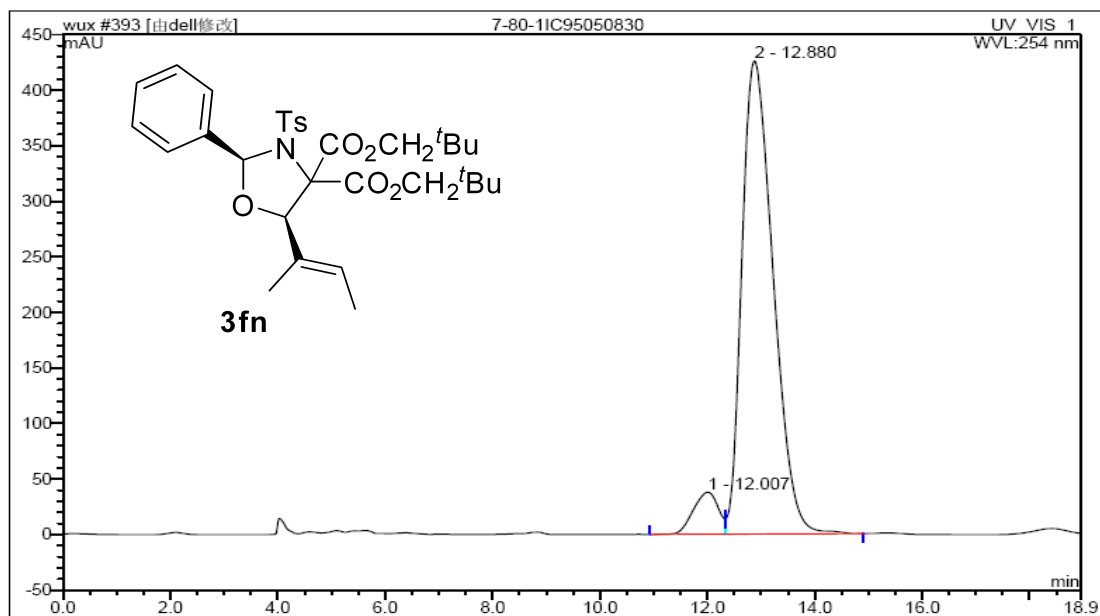

| 序号  | 保留时间<br>min | 峰名称  | 峰高<br>mAU | 峰面积<br>mAU*min | 相对峰面积<br>% | 样品量   | 类型 |
|-----|-------------|------|-----------|----------------|------------|-------|----|
| 1   | 12.01       | n.a. | 37.674    | 20.125         | 6.55       | n.a.  | BM |
| 2   | 12.88       | n.a. | 425.630   | 287.355        | 93.45      | n.a.  | MB |
| 总和: |             |      | 463.304   | 307.480        | 100.00     | 0.000 |    |

**3fo** HPLC using an OZ3 (*n*-Hexane/*i*PrOH=95/05, flow rate 0.8 ml/min)

Racemic **3fo**

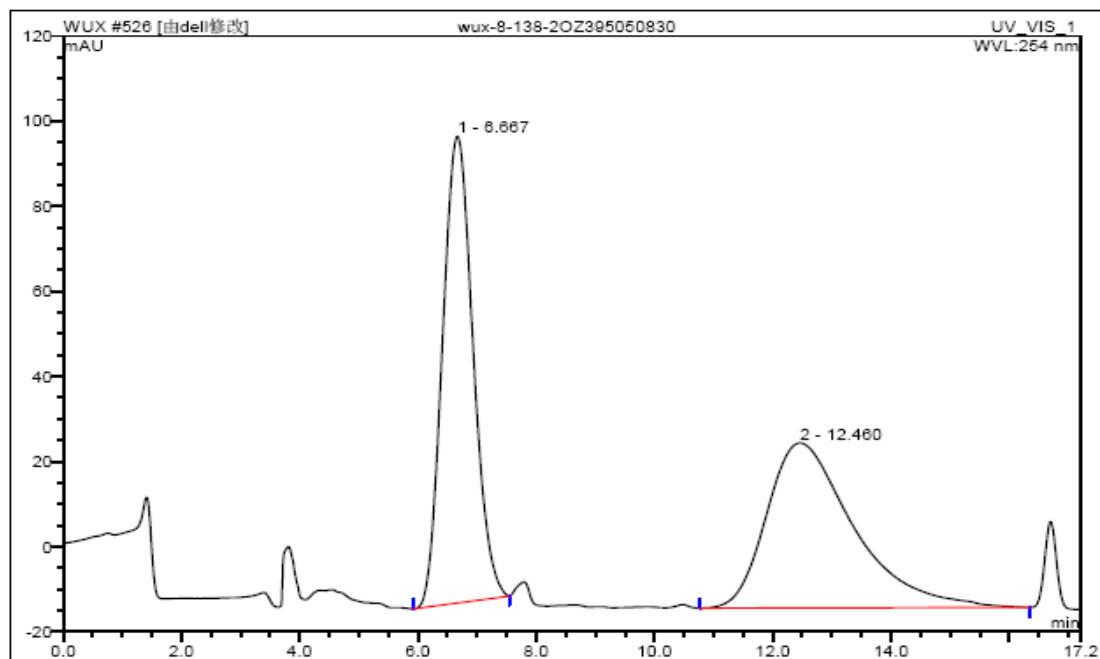

| 序号  | 保留时间<br>min | 峰名称  | 峰高<br>mAU | 峰面积<br>mAU*min | 相对峰面积<br>% | 样品量   | 类型   |
|-----|-------------|------|-----------|----------------|------------|-------|------|
| 1   | 6.67        | n.a. | 109.677   | 65.391         | 49.78      | n.a.  | BMB* |
| 2   | 12.46       | n.a. | 38.762    | 65.967         | 50.22      | n.a.  | BMB* |
| 总和: |             |      | 148.440   | 131.359        | 100.00     | 0.000 |      |

Enantioenriched **3fn**

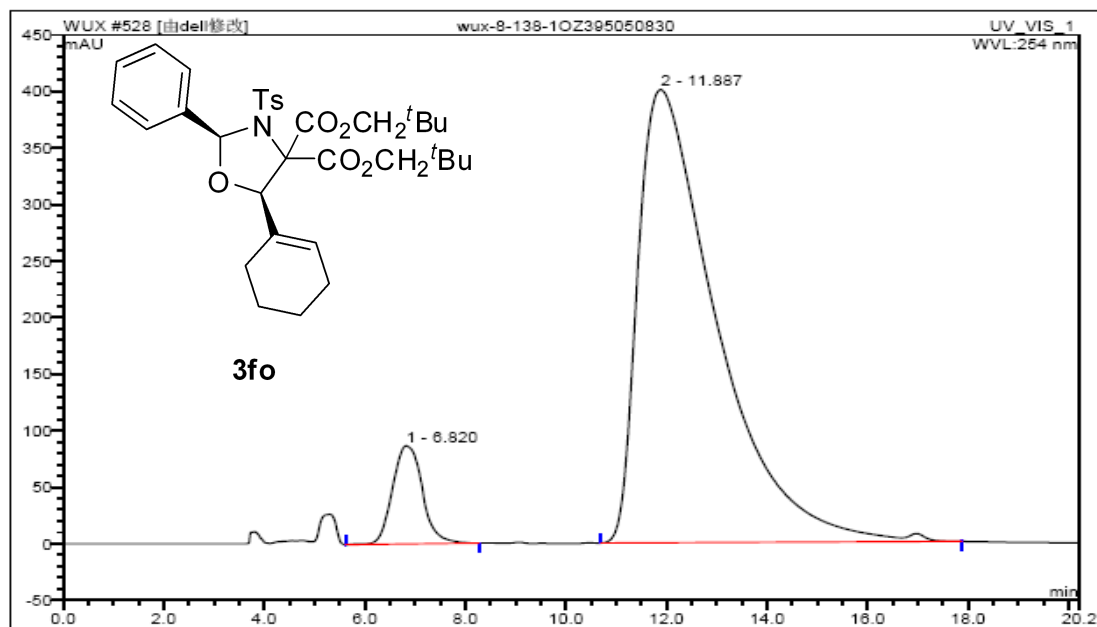

| 序号  | 保留时间<br>min | 峰名称  | 峰高<br>mAU | 峰面积<br>mAU*min | 相对峰面积<br>% | 样品量   | 类型   |
|-----|-------------|------|-----------|----------------|------------|-------|------|
| 1   | 6.82        | n.a. | 86.883    | 59.752         | 7.59       | n.a.  | BMB  |
| 2   | 11.89       | n.a. | 400.798   | 727.456        | 92.41      | n.a.  | BMB* |
| 总和: |             |      | 487.682   | 787.208        | 100.00     | 0.000 |      |

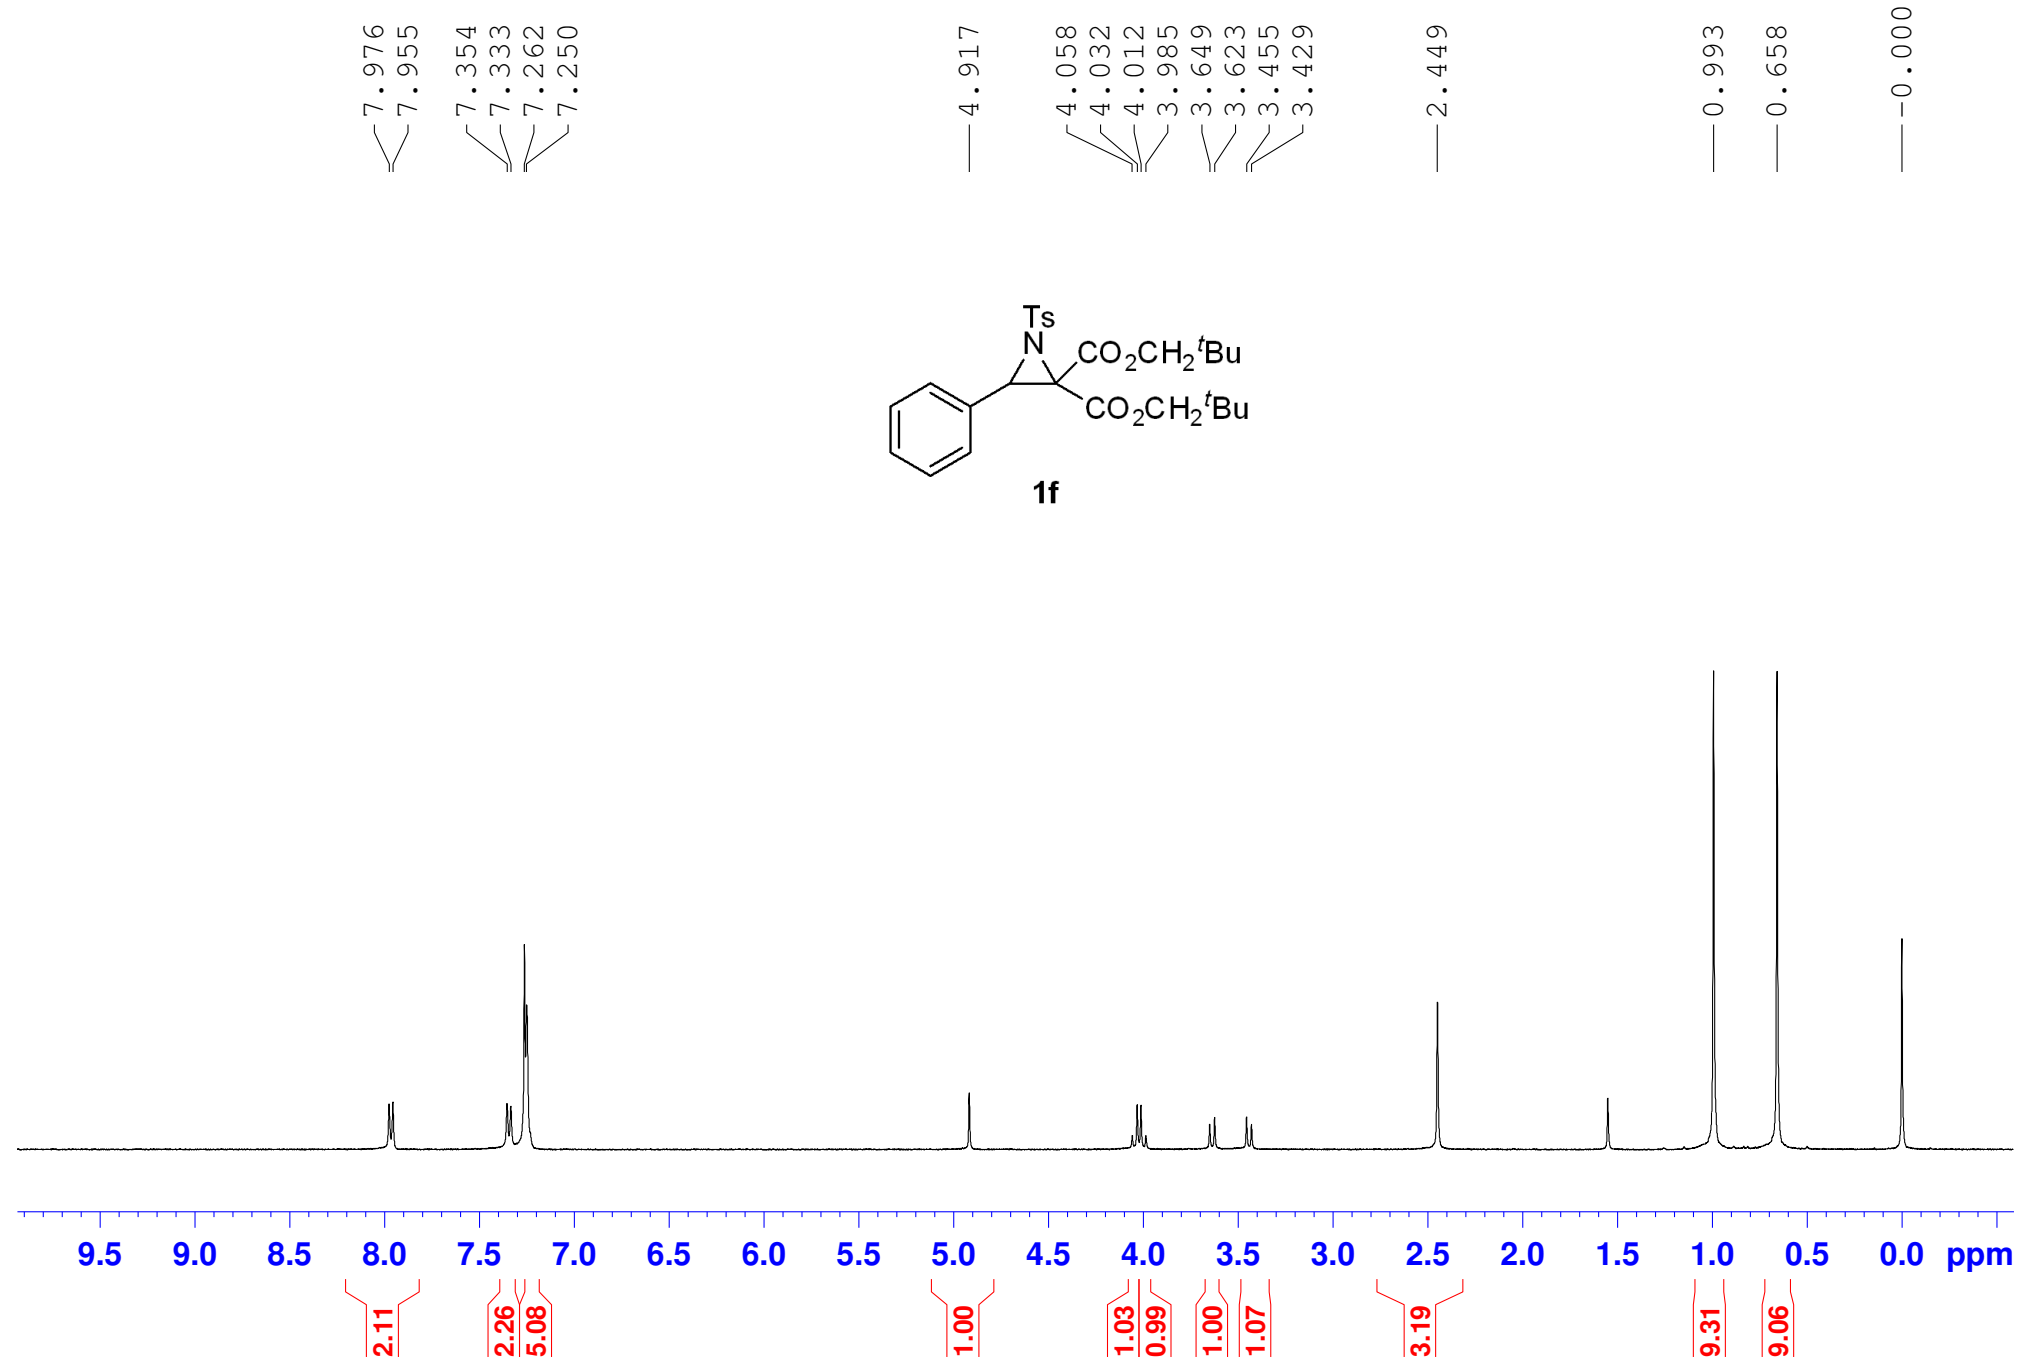

163.22  
162.62

144.62  
136.65  
131.21  
129.65  
128.85  
128.47  
127.70  
126.88

77.32  
77.00  
76.68  
76.51  
75.33

57.79  
49.65

31.38  
30.93  
26.36  
25.93  
21.64

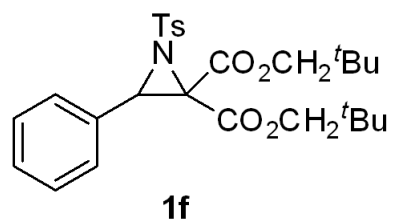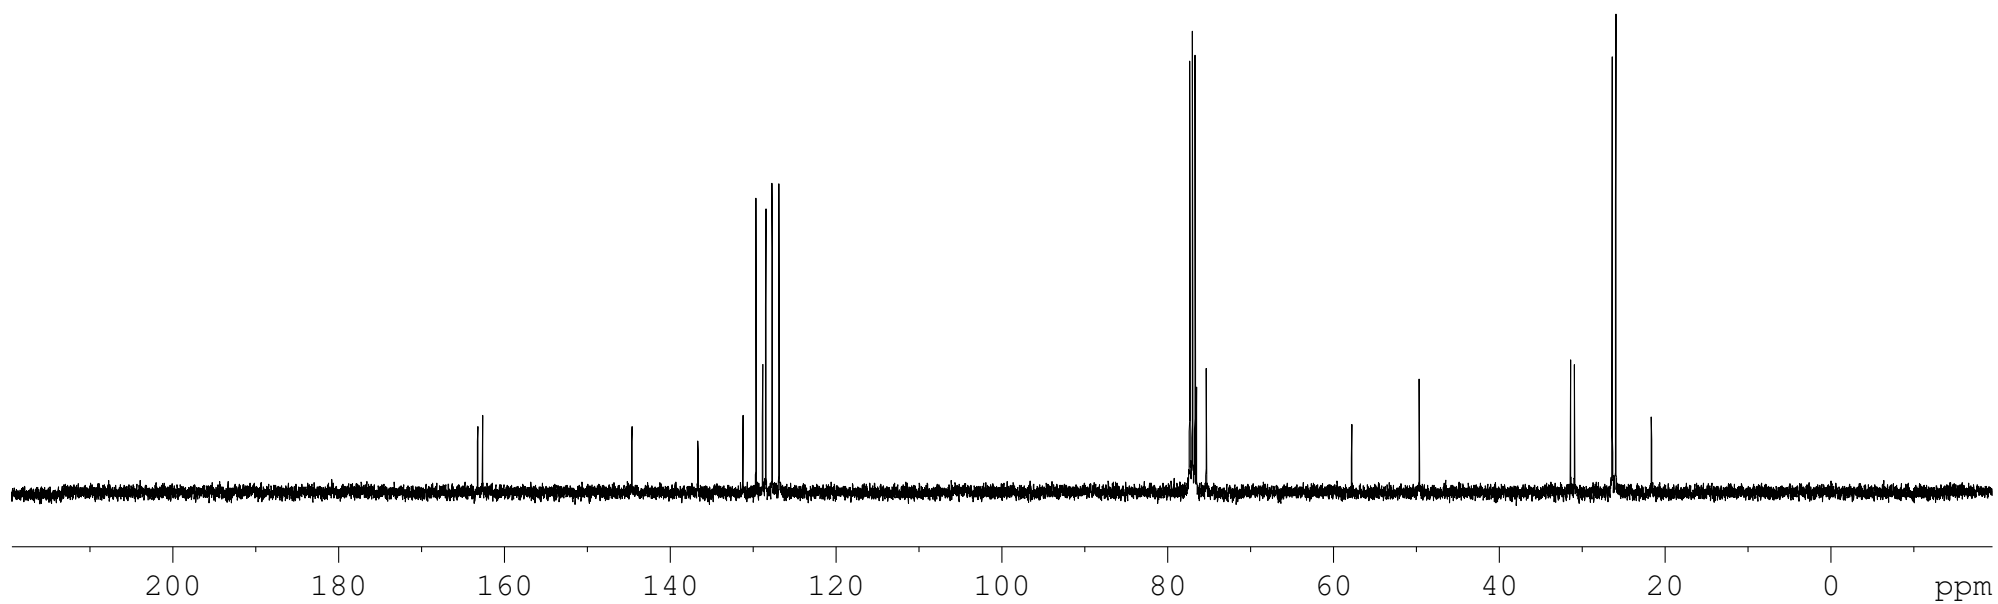



7.972  
7.951  
7.346  
7.325  
7.261  
7.160  
7.140  
7.110  
7.090

4.899  
4.066  
4.039  
3.998  
3.972  
3.709  
3.683  
3.442  
3.416  
2.880  
2.863  
2.846  
2.829  
2.812  
2.794  
2.777  
2.443

1.178  
1.161  
0.987  
0.620  
0.000

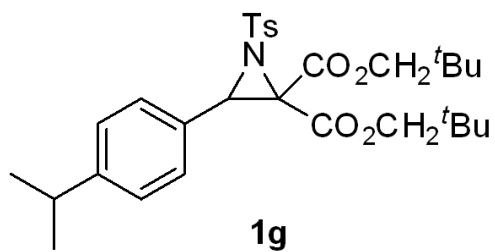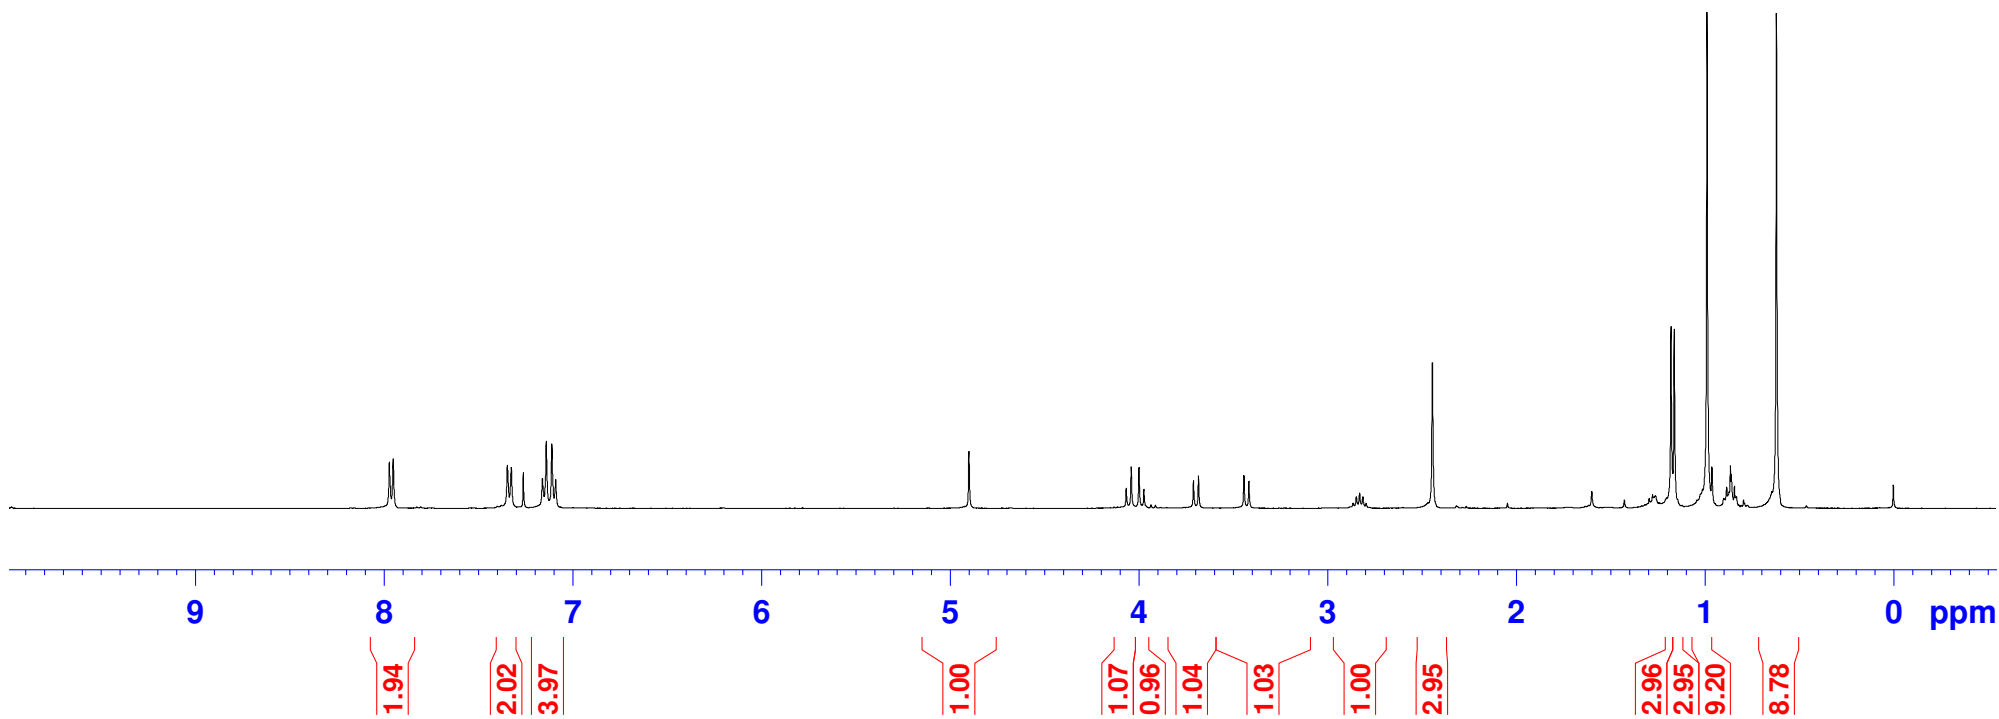

163.34  
162.75

149.74  
144.50

136.82  
129.62  
128.60  
127.67  
126.81  
126.58

77.32  
77.00  
76.68  
76.44  
75.25

57.79  
49.92

33.85  
31.39  
30.94  
26.34  
25.93  
23.81  
21.65

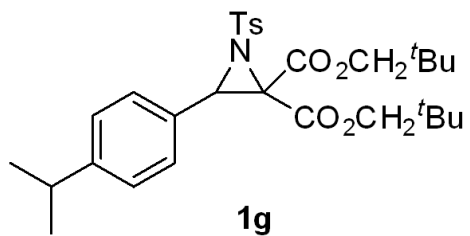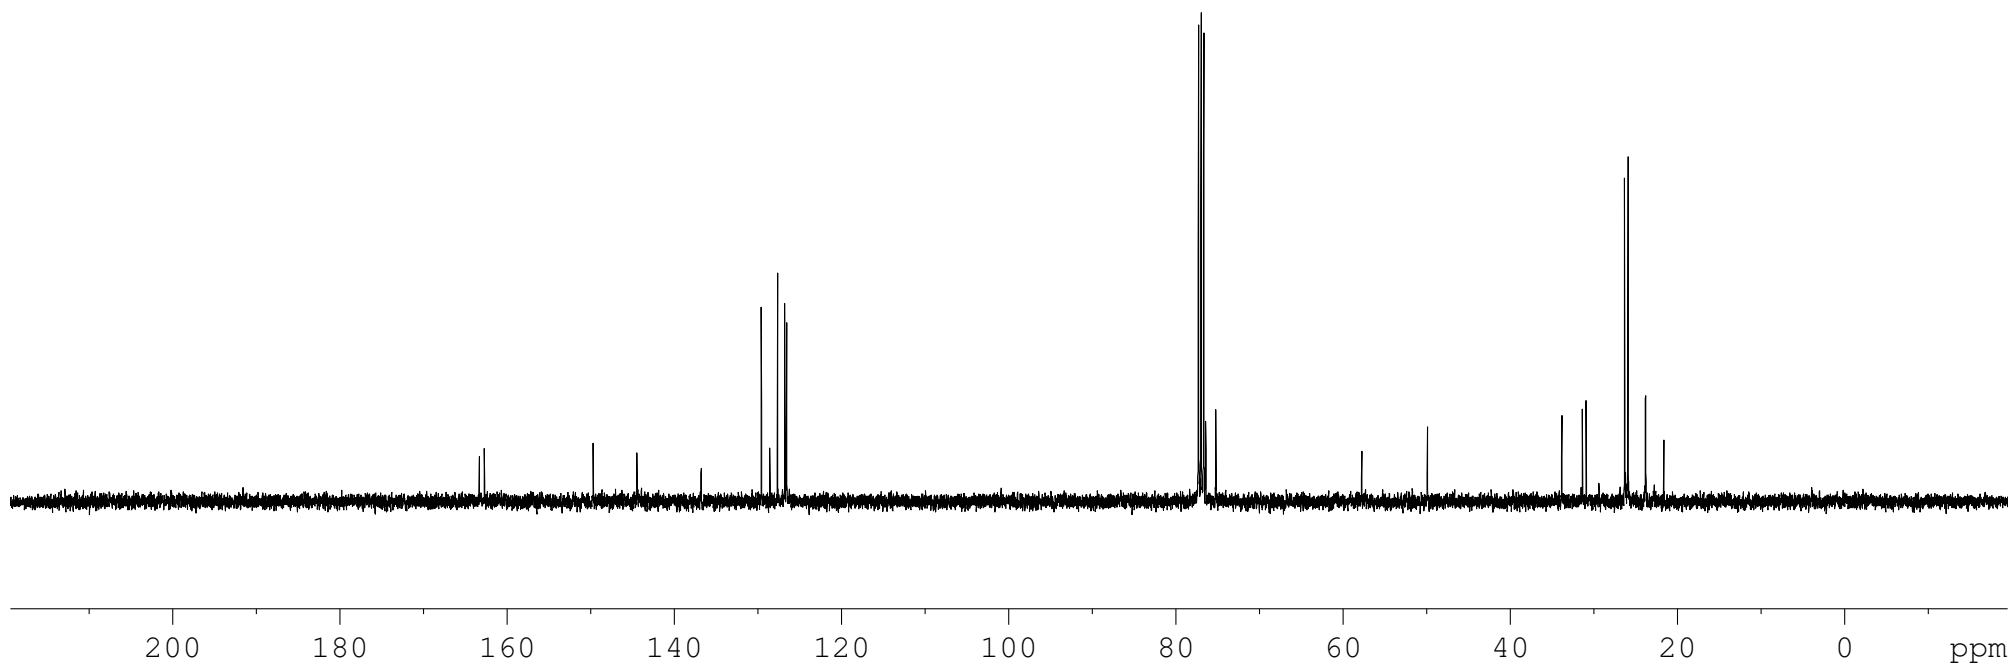

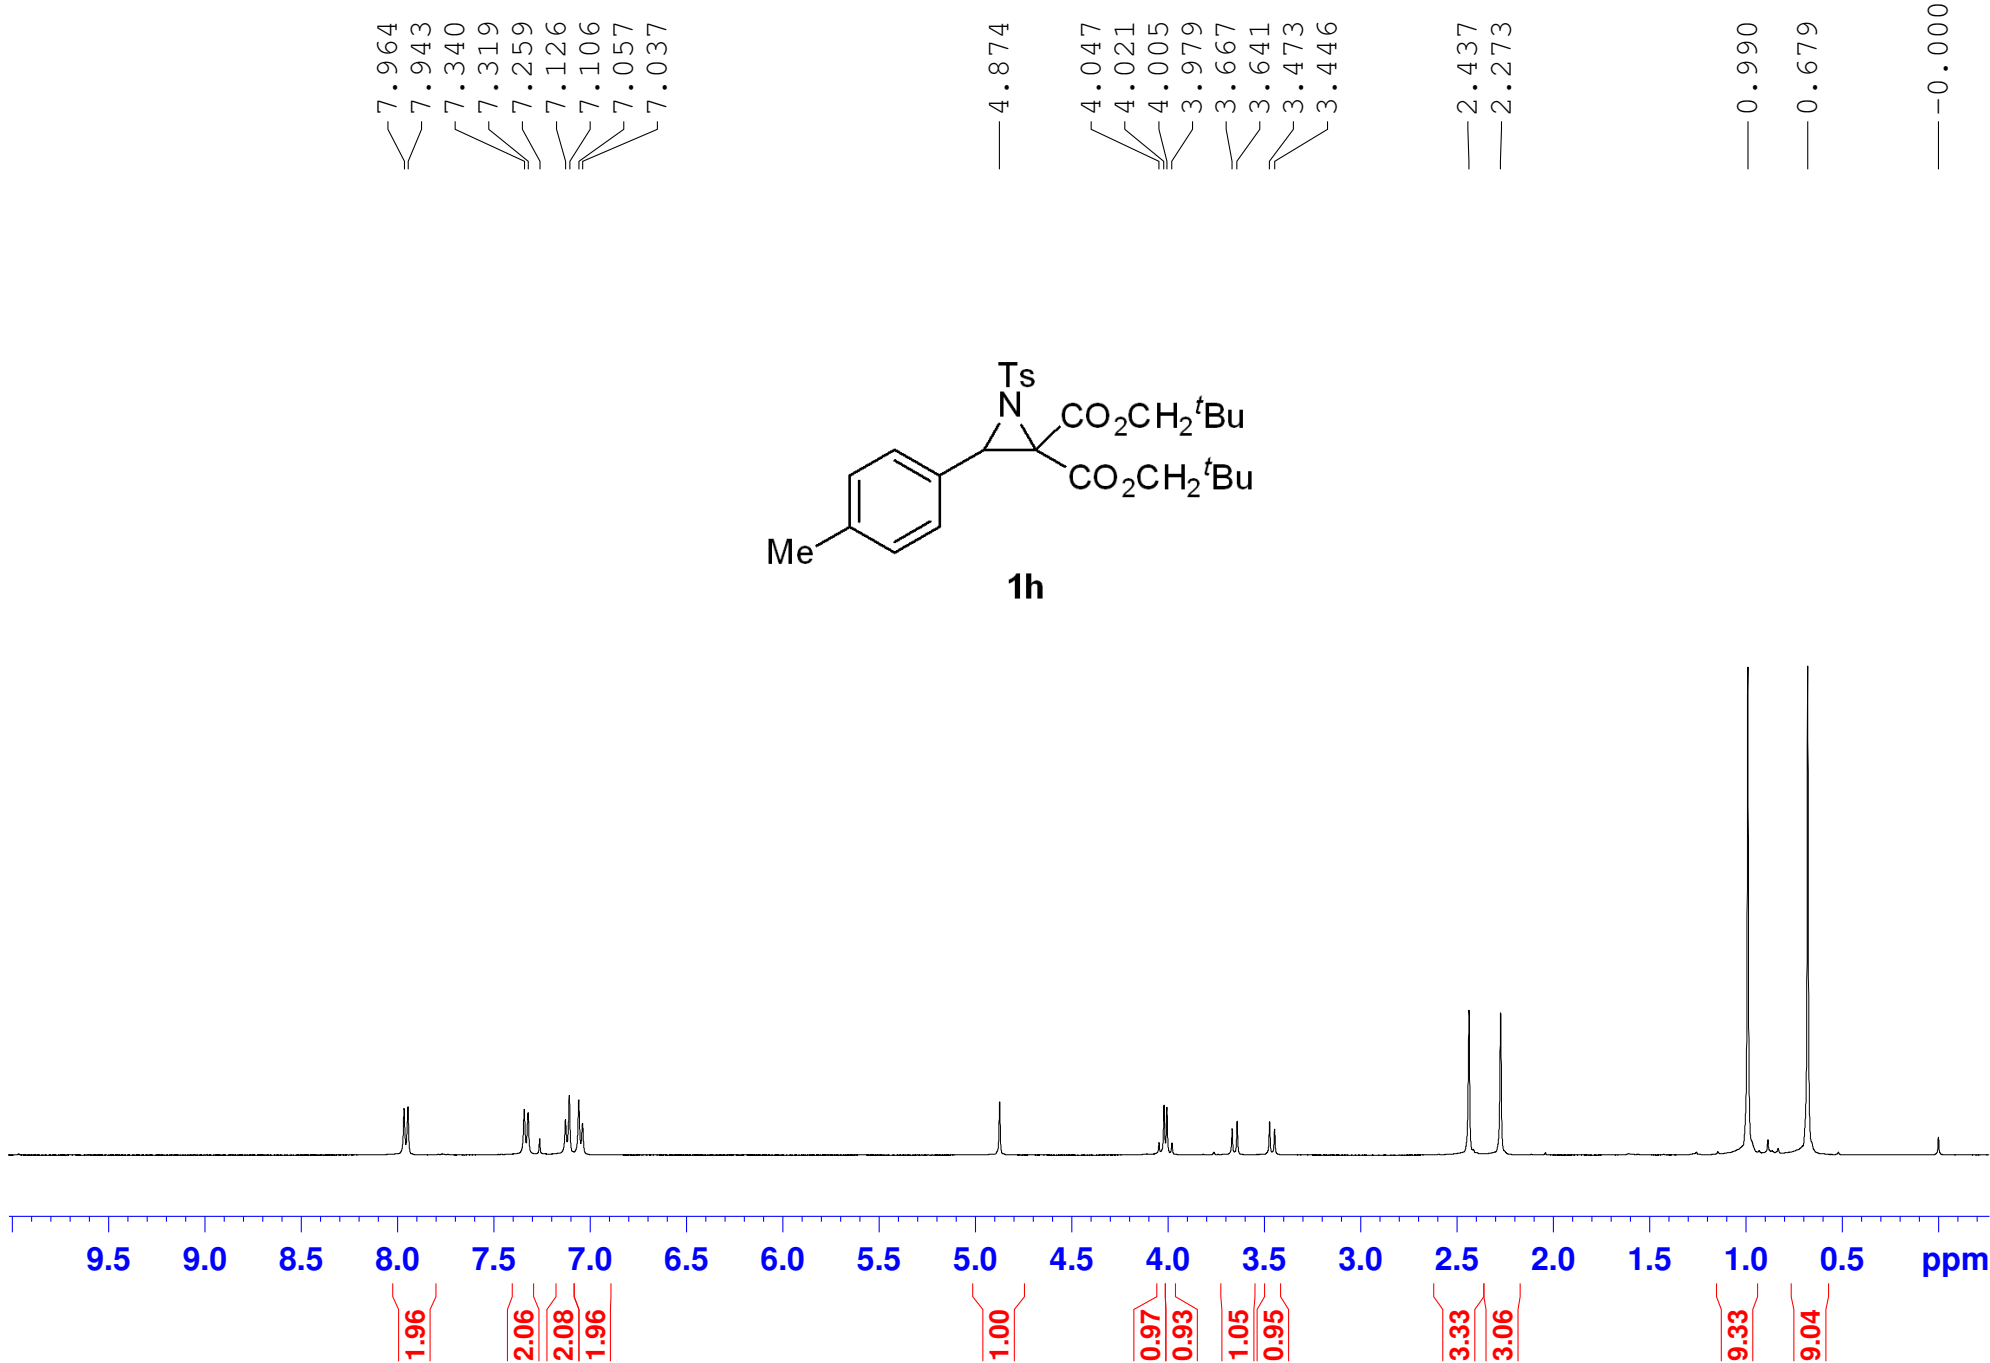

163.30  
162.71

144.53  
138.73  
136.75  
129.62  
129.13  
128.20  
127.68  
126.76

77.32  
77.00  
76.68  
76.46  
75.27

57.78  
49.73

31.38  
30.95  
26.36  
25.94  
21.63  
21.11

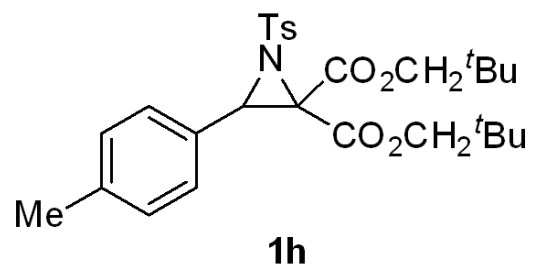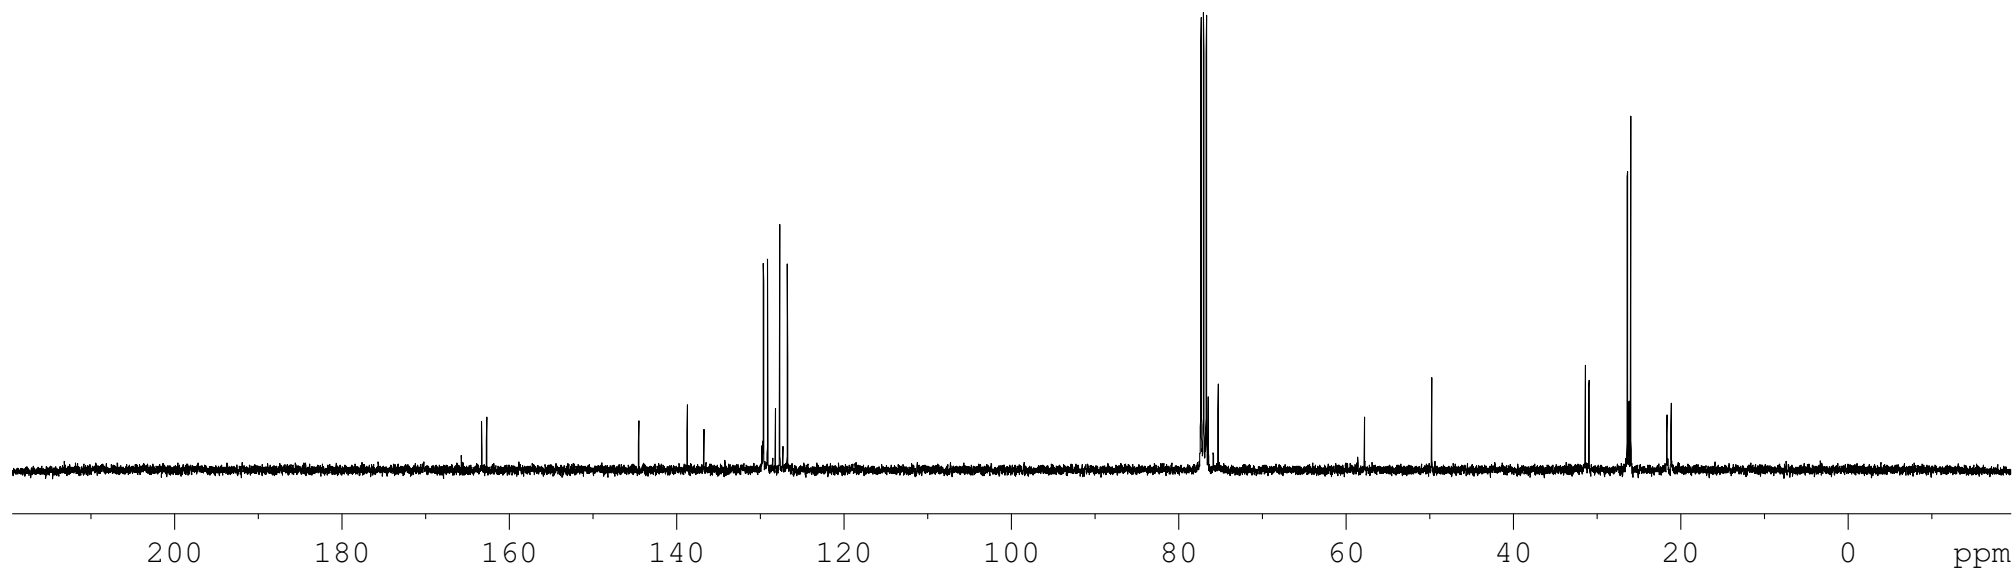

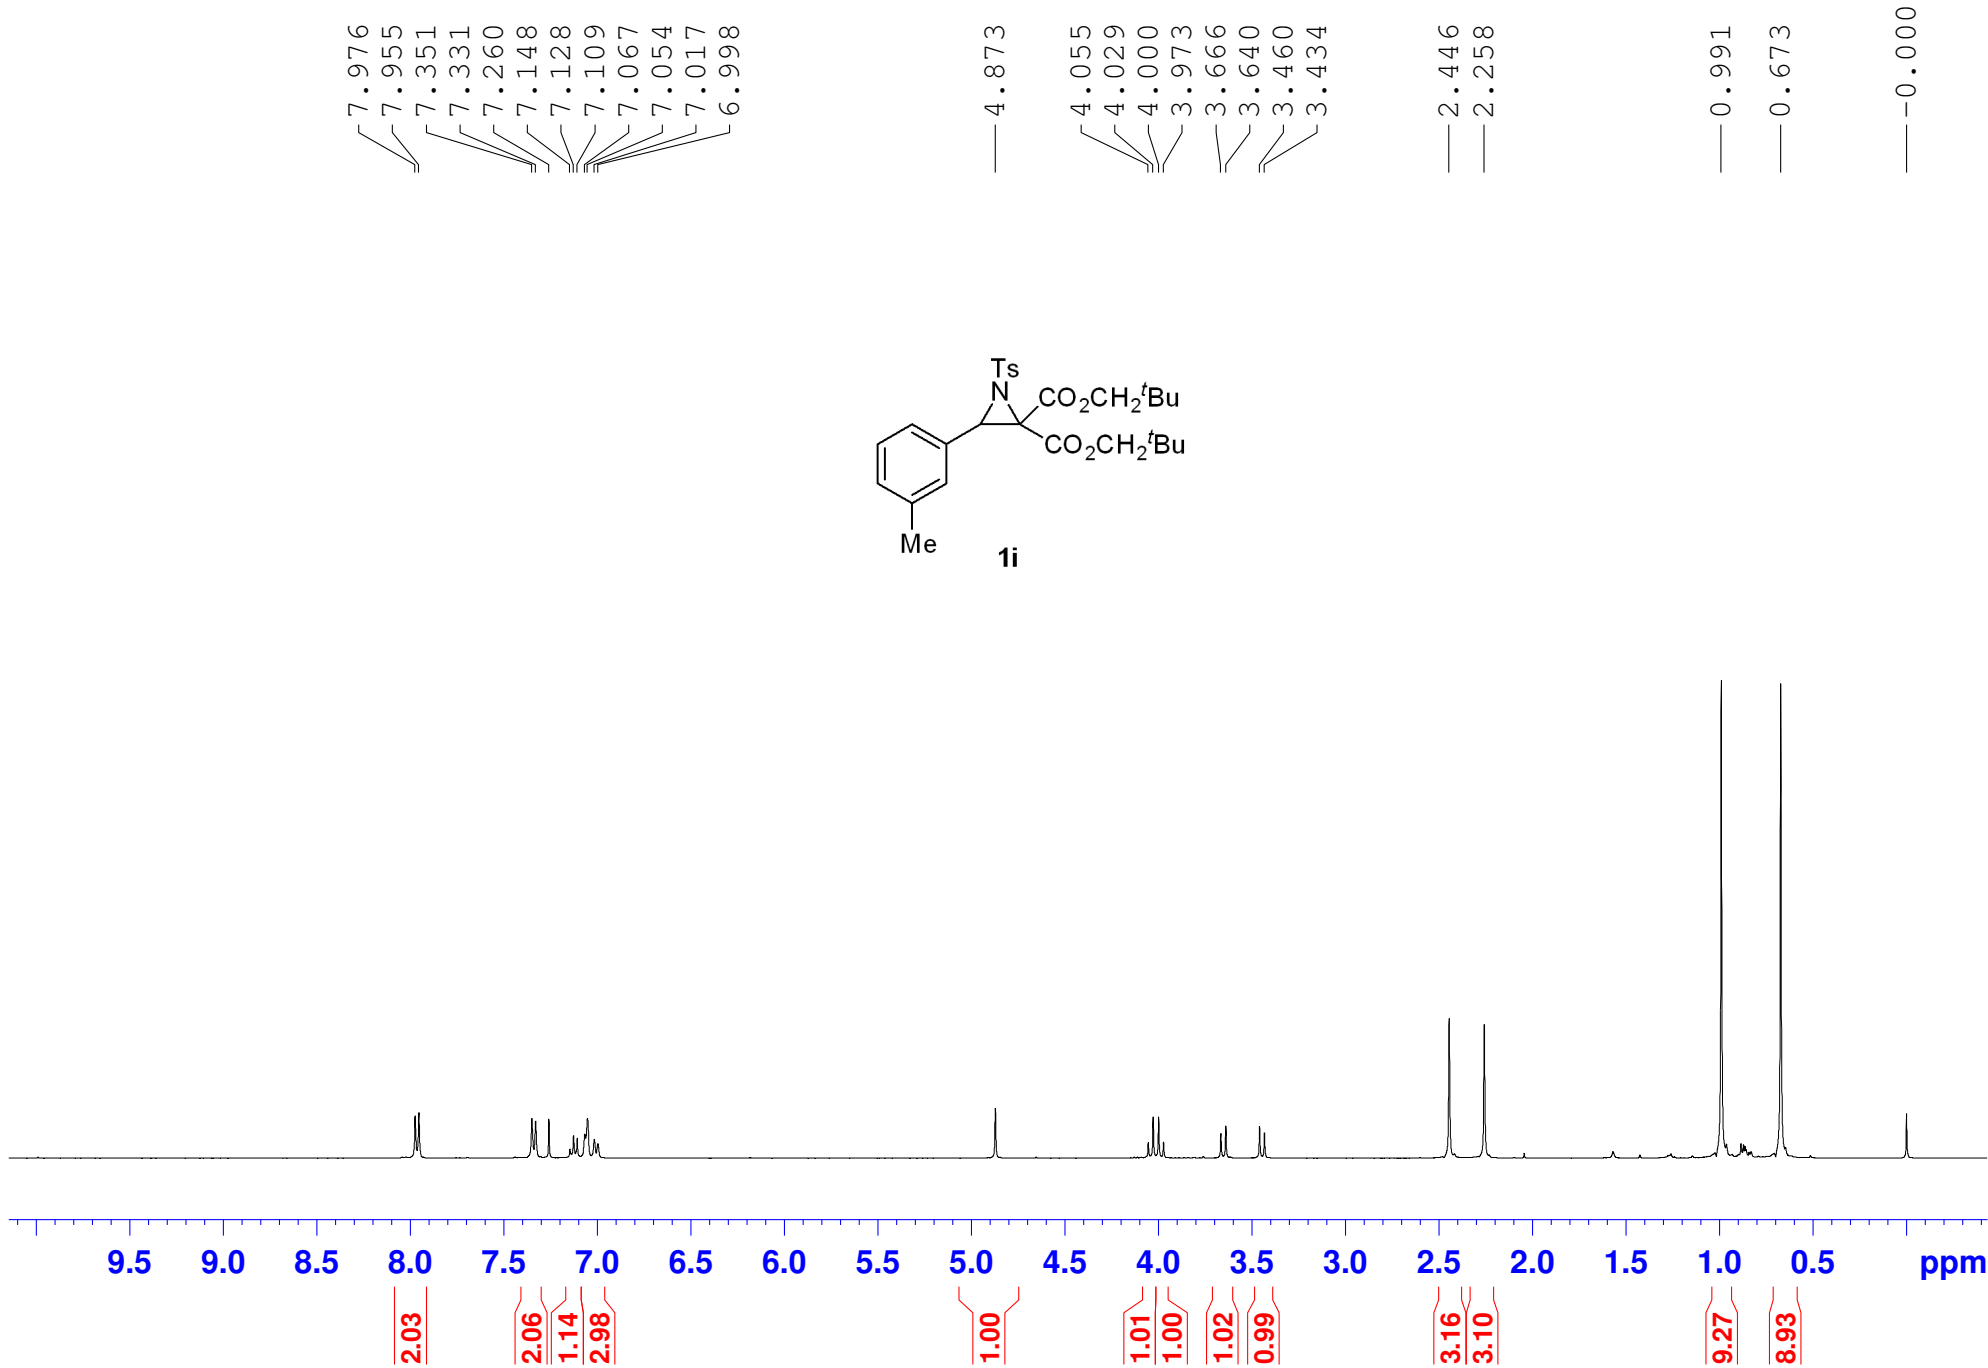

163.27  
162.70

144.60  
138.21  
136.64  
131.14  
129.63  
128.39  
127.75  
127.58  
123.84

77.32  
77.00  
76.69  
76.49  
75.32

— 57.74  
— 49.64

31.40  
30.96  
26.37  
25.94  
21.65  
21.23

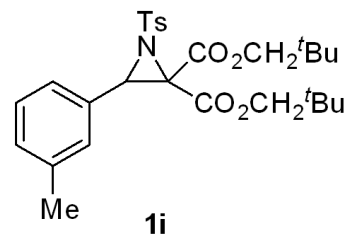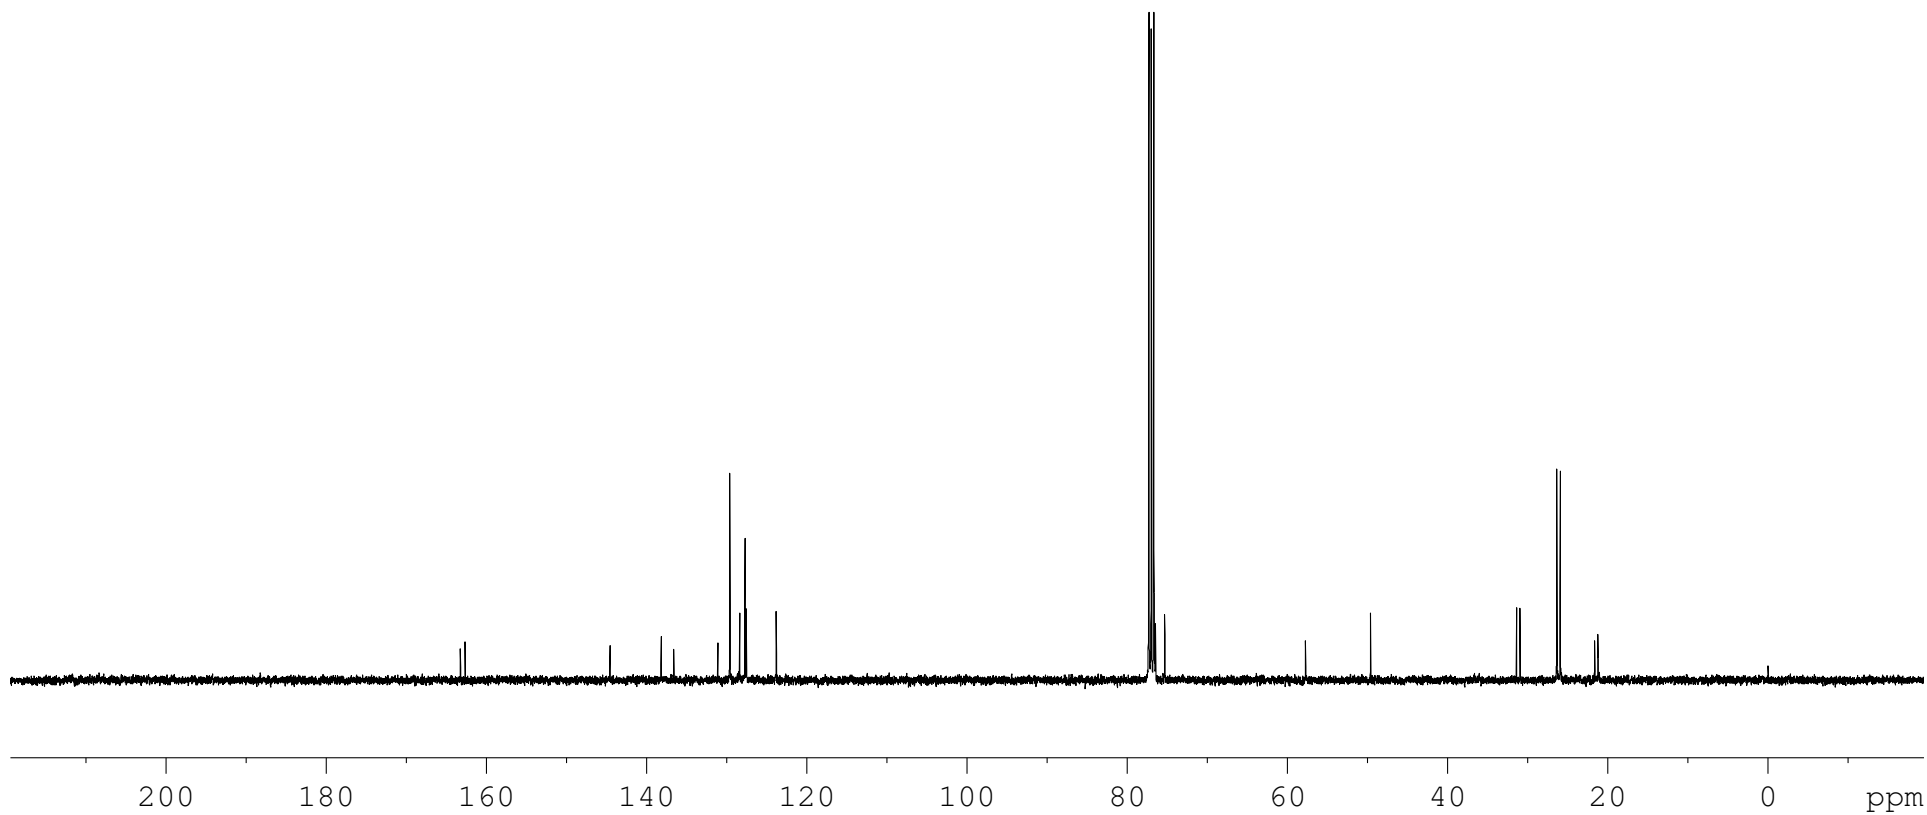

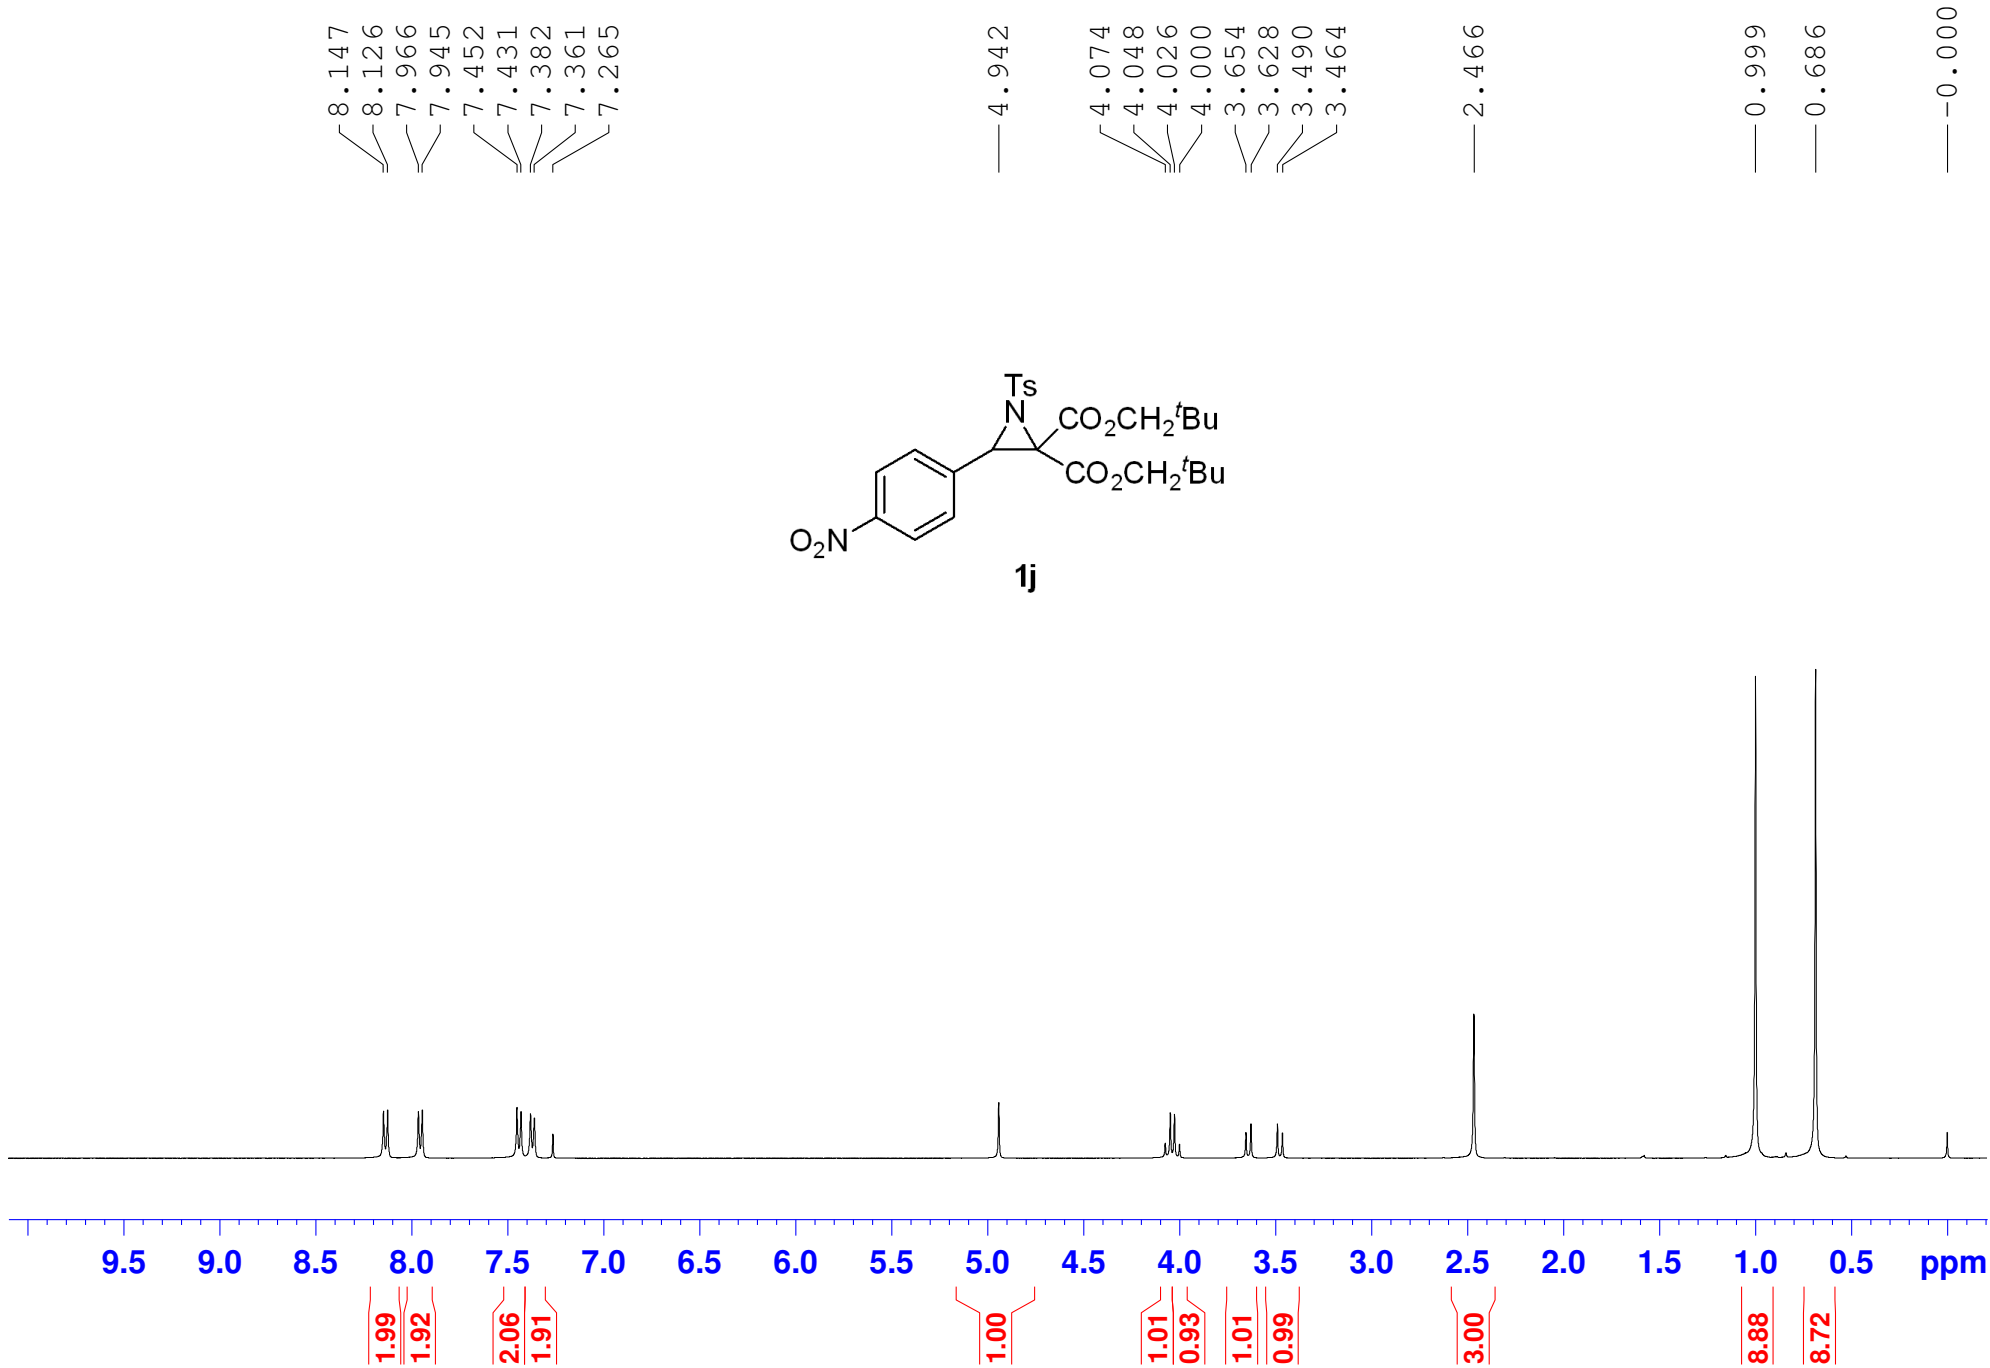

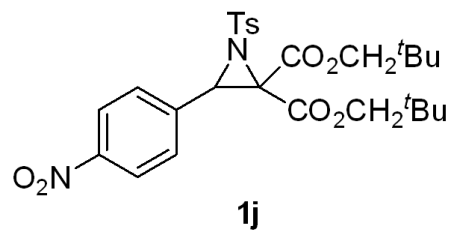

162.62  
162.08

148.25  
145.22  
138.35  
135.99  
129.85  
128.10  
127.76  
123.70

77.32  
77.00  
76.86  
76.68  
75.66

57.86  
48.25

31.40  
30.99  
26.34  
25.90  
21.69

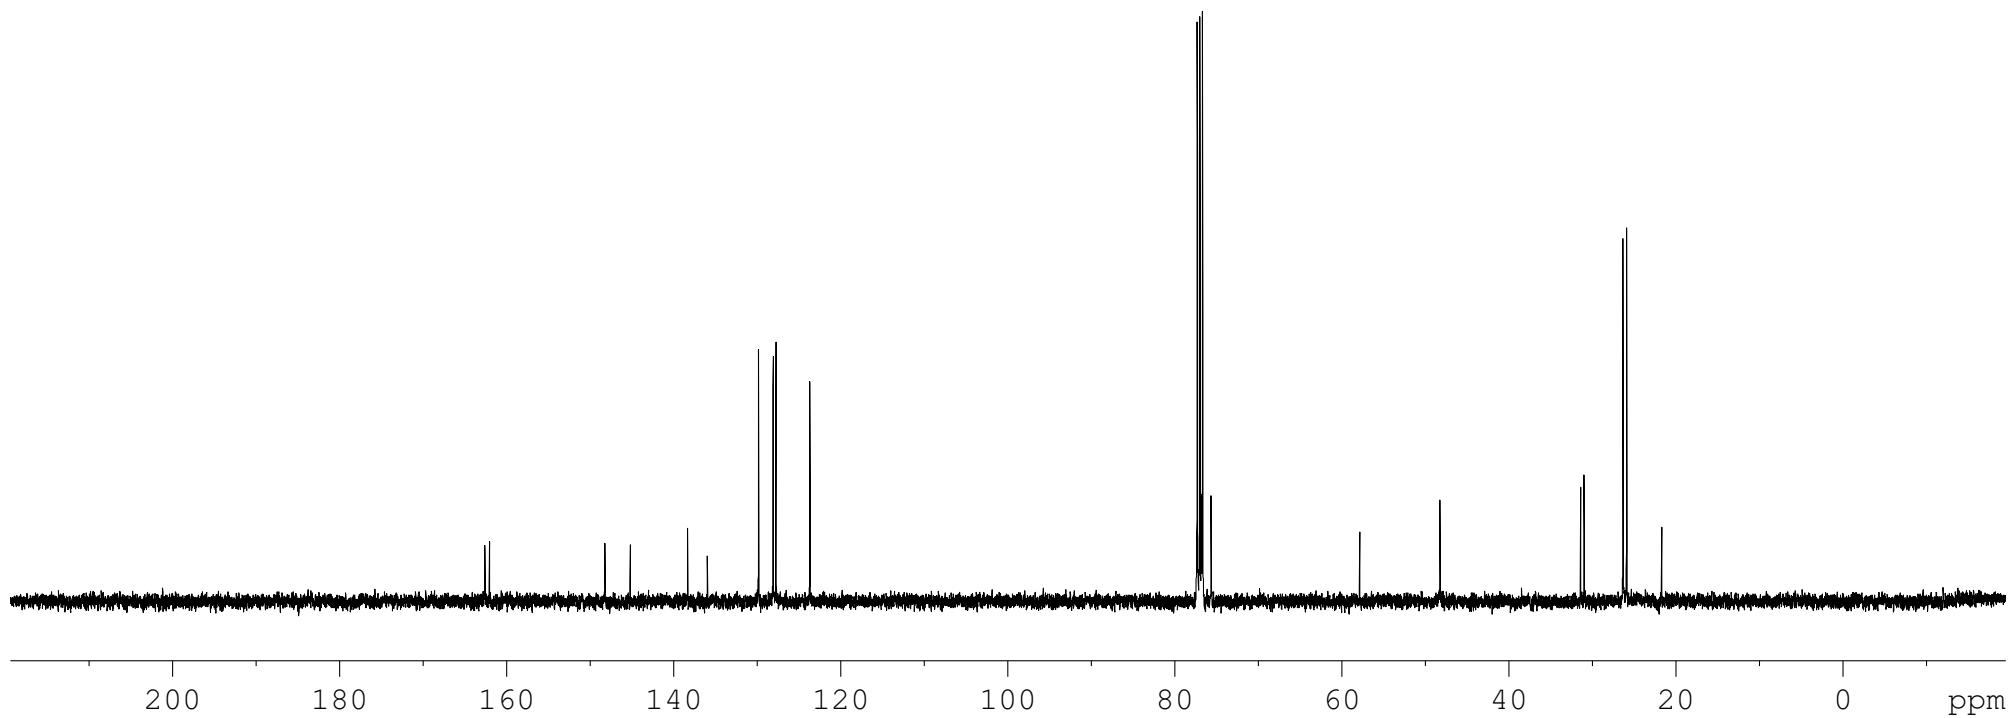



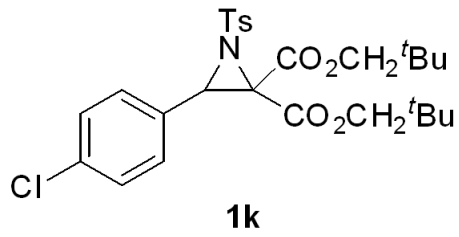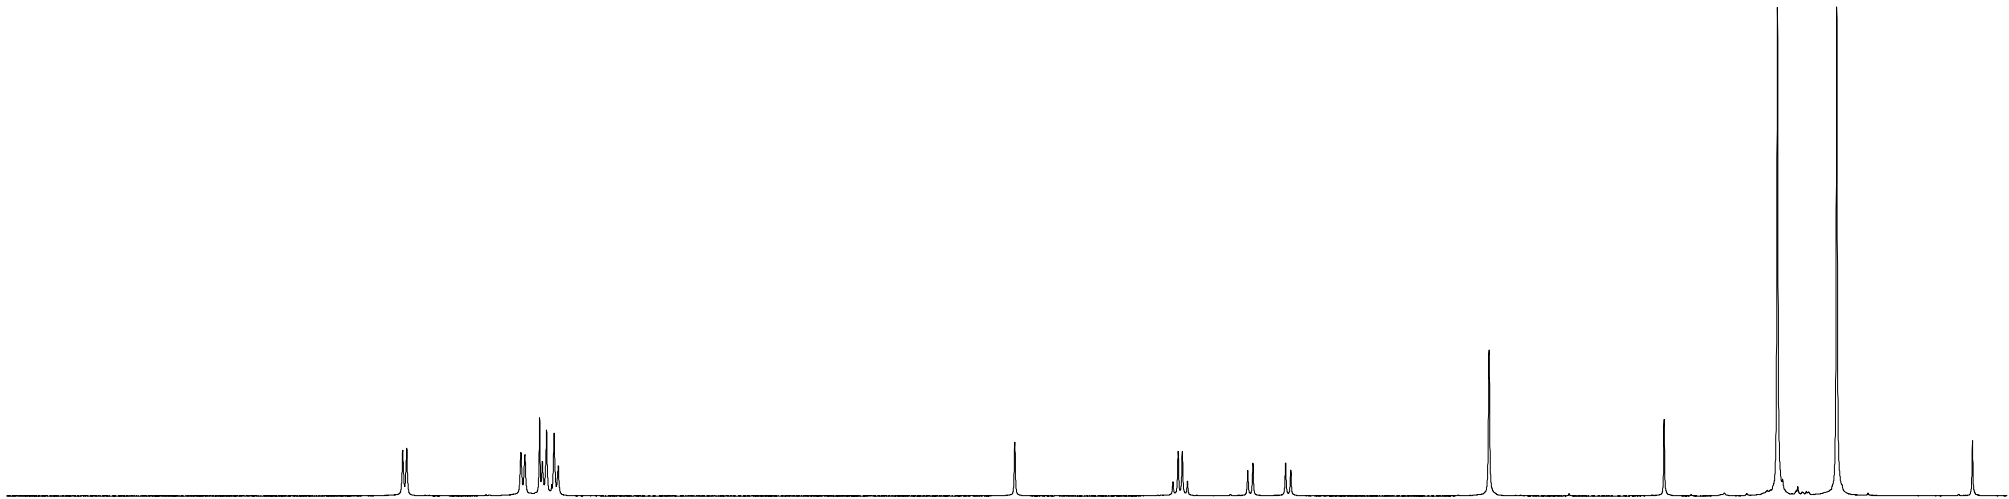

9.5 9.0 8.5 8.0 7.5 7.0 6.5 6.0 5.5 5.0 4.5 4.0 3.5 3.0 2.5 2.0 1.5 1.0 0.5 ppm

2.05 1.99 1.98 1.92 1.00 0.96 0.96 1.07 1.06 3.09 9.12 9.20

7.956  
7.935  
7.356  
7.336  
7.261  
7.248  
7.226  
7.191  
7.170

4.855  
4.053  
4.027  
4.006  
3.980  
3.674  
3.648  
3.482  
3.456

2.451

0.989  
0.688

-0.000

163.00  
162.41

144.86  
136.31  
134.93  
129.72  
128.72  
128.28  
127.67

77.32  
77.00  
76.68  
76.61  
75.45

57.74  
48.84

31.37  
30.95  
26.33  
25.90  
21.66

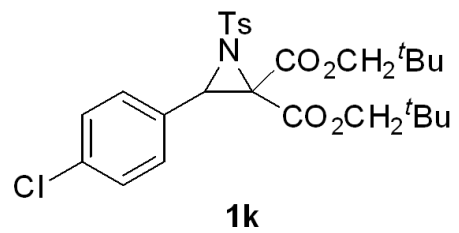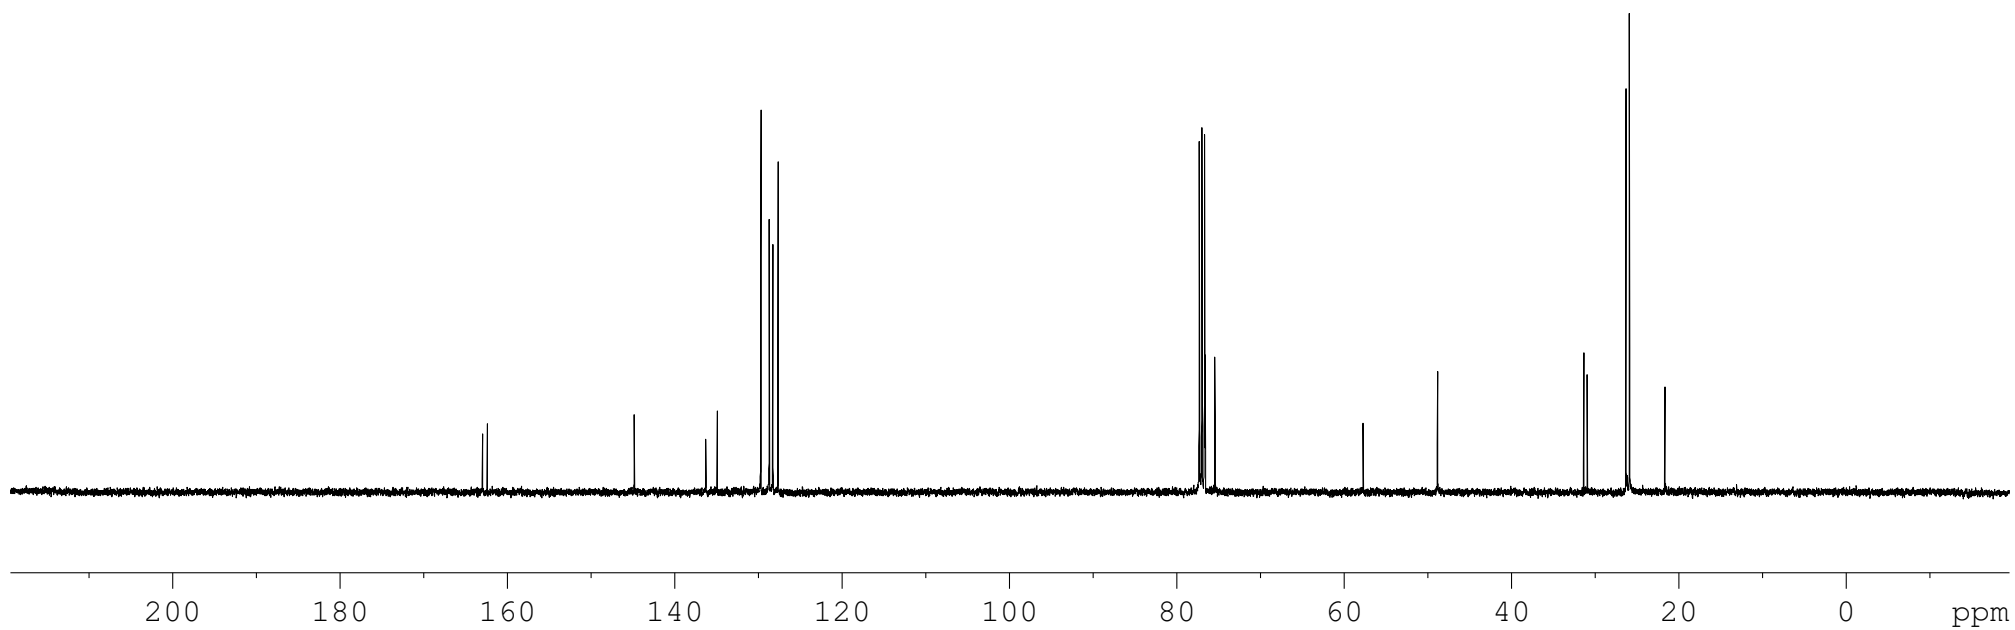

7.953  
7.932  
7.401  
7.380  
7.355  
7.335  
7.263  
7.128  
7.107

4.838

4.054  
4.027  
4.005  
3.979  
3.678  
3.652  
3.485  
3.459

2.450

0.988

0.689

0.000

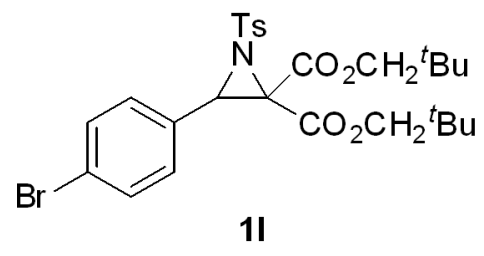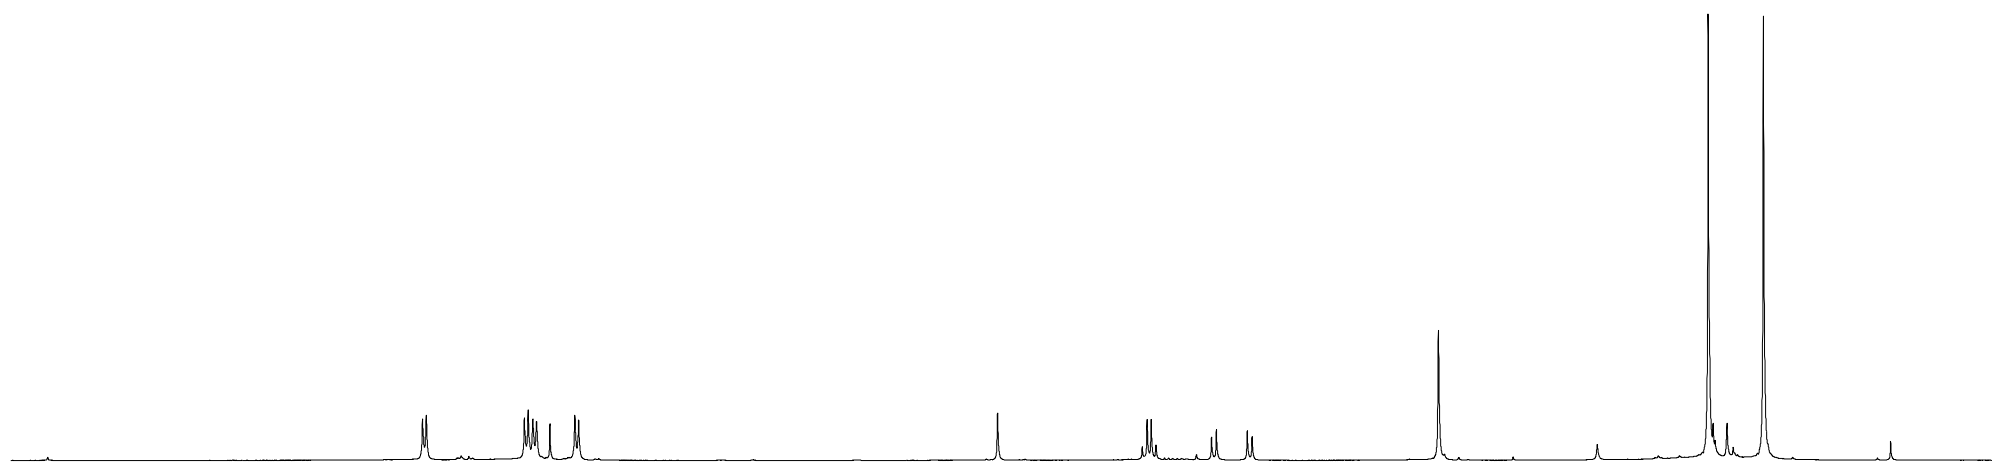

10 9 8 7 6 5 4 3 2 1 0 ppm

2.00

3.97

1.88

1.06

0.90

0.99

0.97

0.99

3.28

8.90

8.80

162.97  
162.40

144.85  
136.35  
131.67  
130.29  
129.72  
128.58  
127.68  
123.11

77.32  
77.00  
76.68  
76.61  
75.45

57.71  
48.89

31.37  
30.96  
26.33  
25.91  
21.65

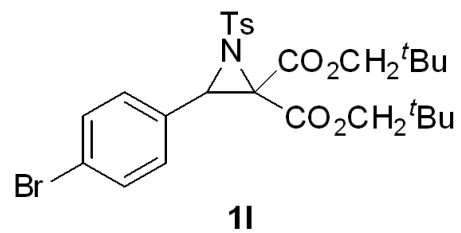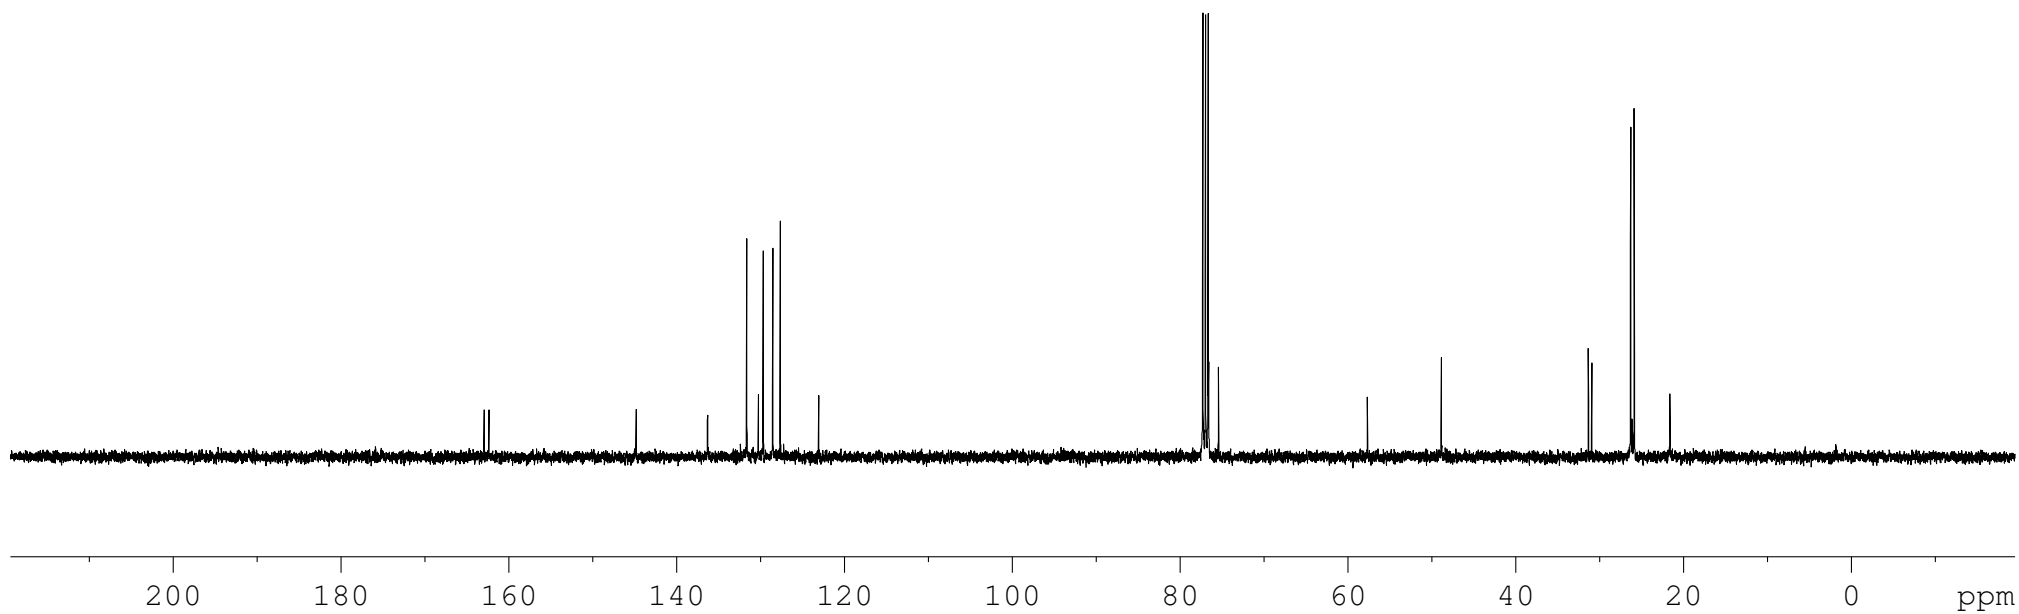

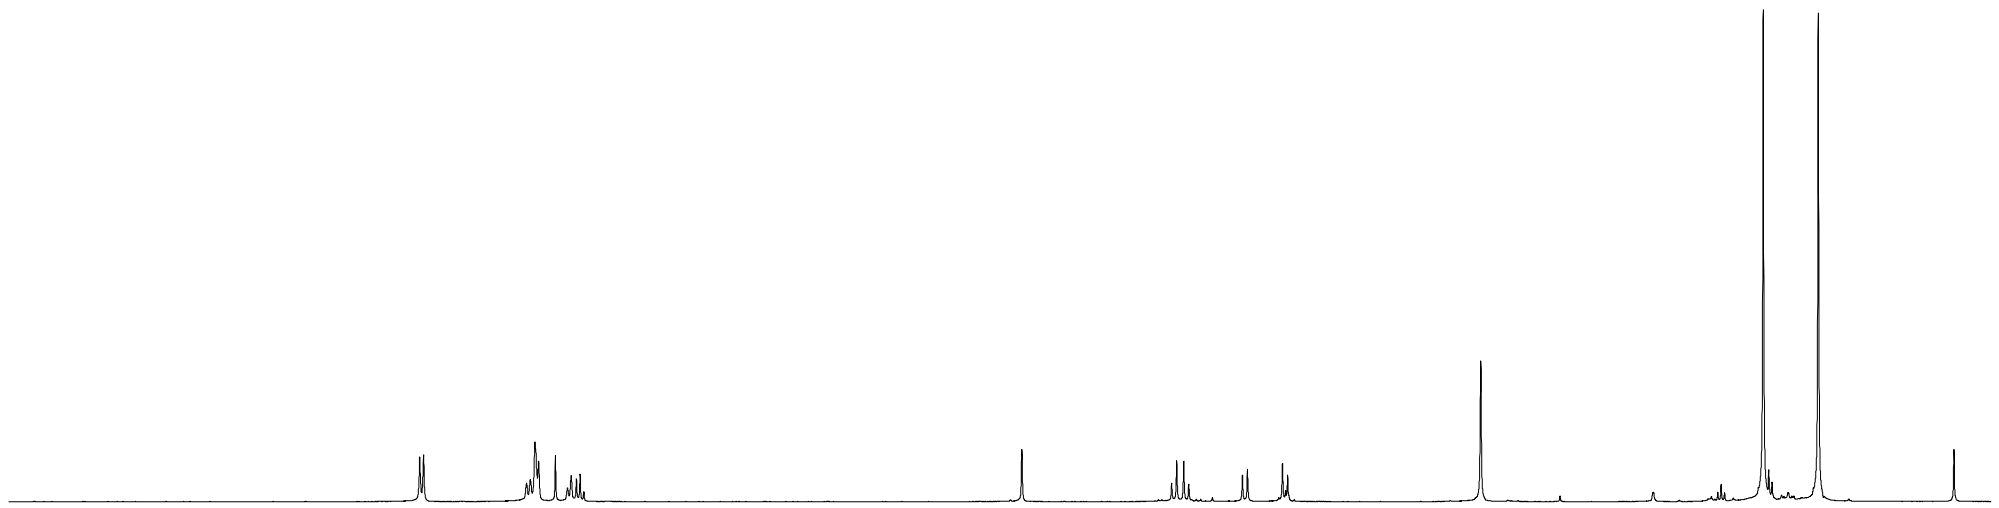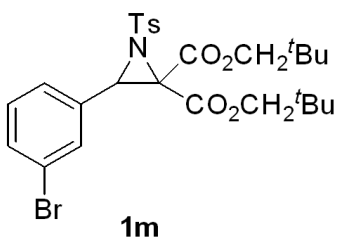

7.966  
7.946  
7.411  
7.391  
7.368  
7.349  
7.261  
7.199  
7.179  
7.152  
7.133  
7.114

4.840  
4.062  
4.036  
3.999  
3.973  
3.694  
3.668  
3.486  
3.470  
3.460

2.457

0.990  
0.704

0.000

9.5 9.0 8.5 8.0 7.5 7.0 6.5 6.0 5.5 5.0 4.5 4.0 3.5 3.0 2.5 2.0 1.5 1.0 0.5 ppm

1.86

3.81

1.94

1.00

1.04

0.94

0.96

1.20

2.86

9.00

8.70

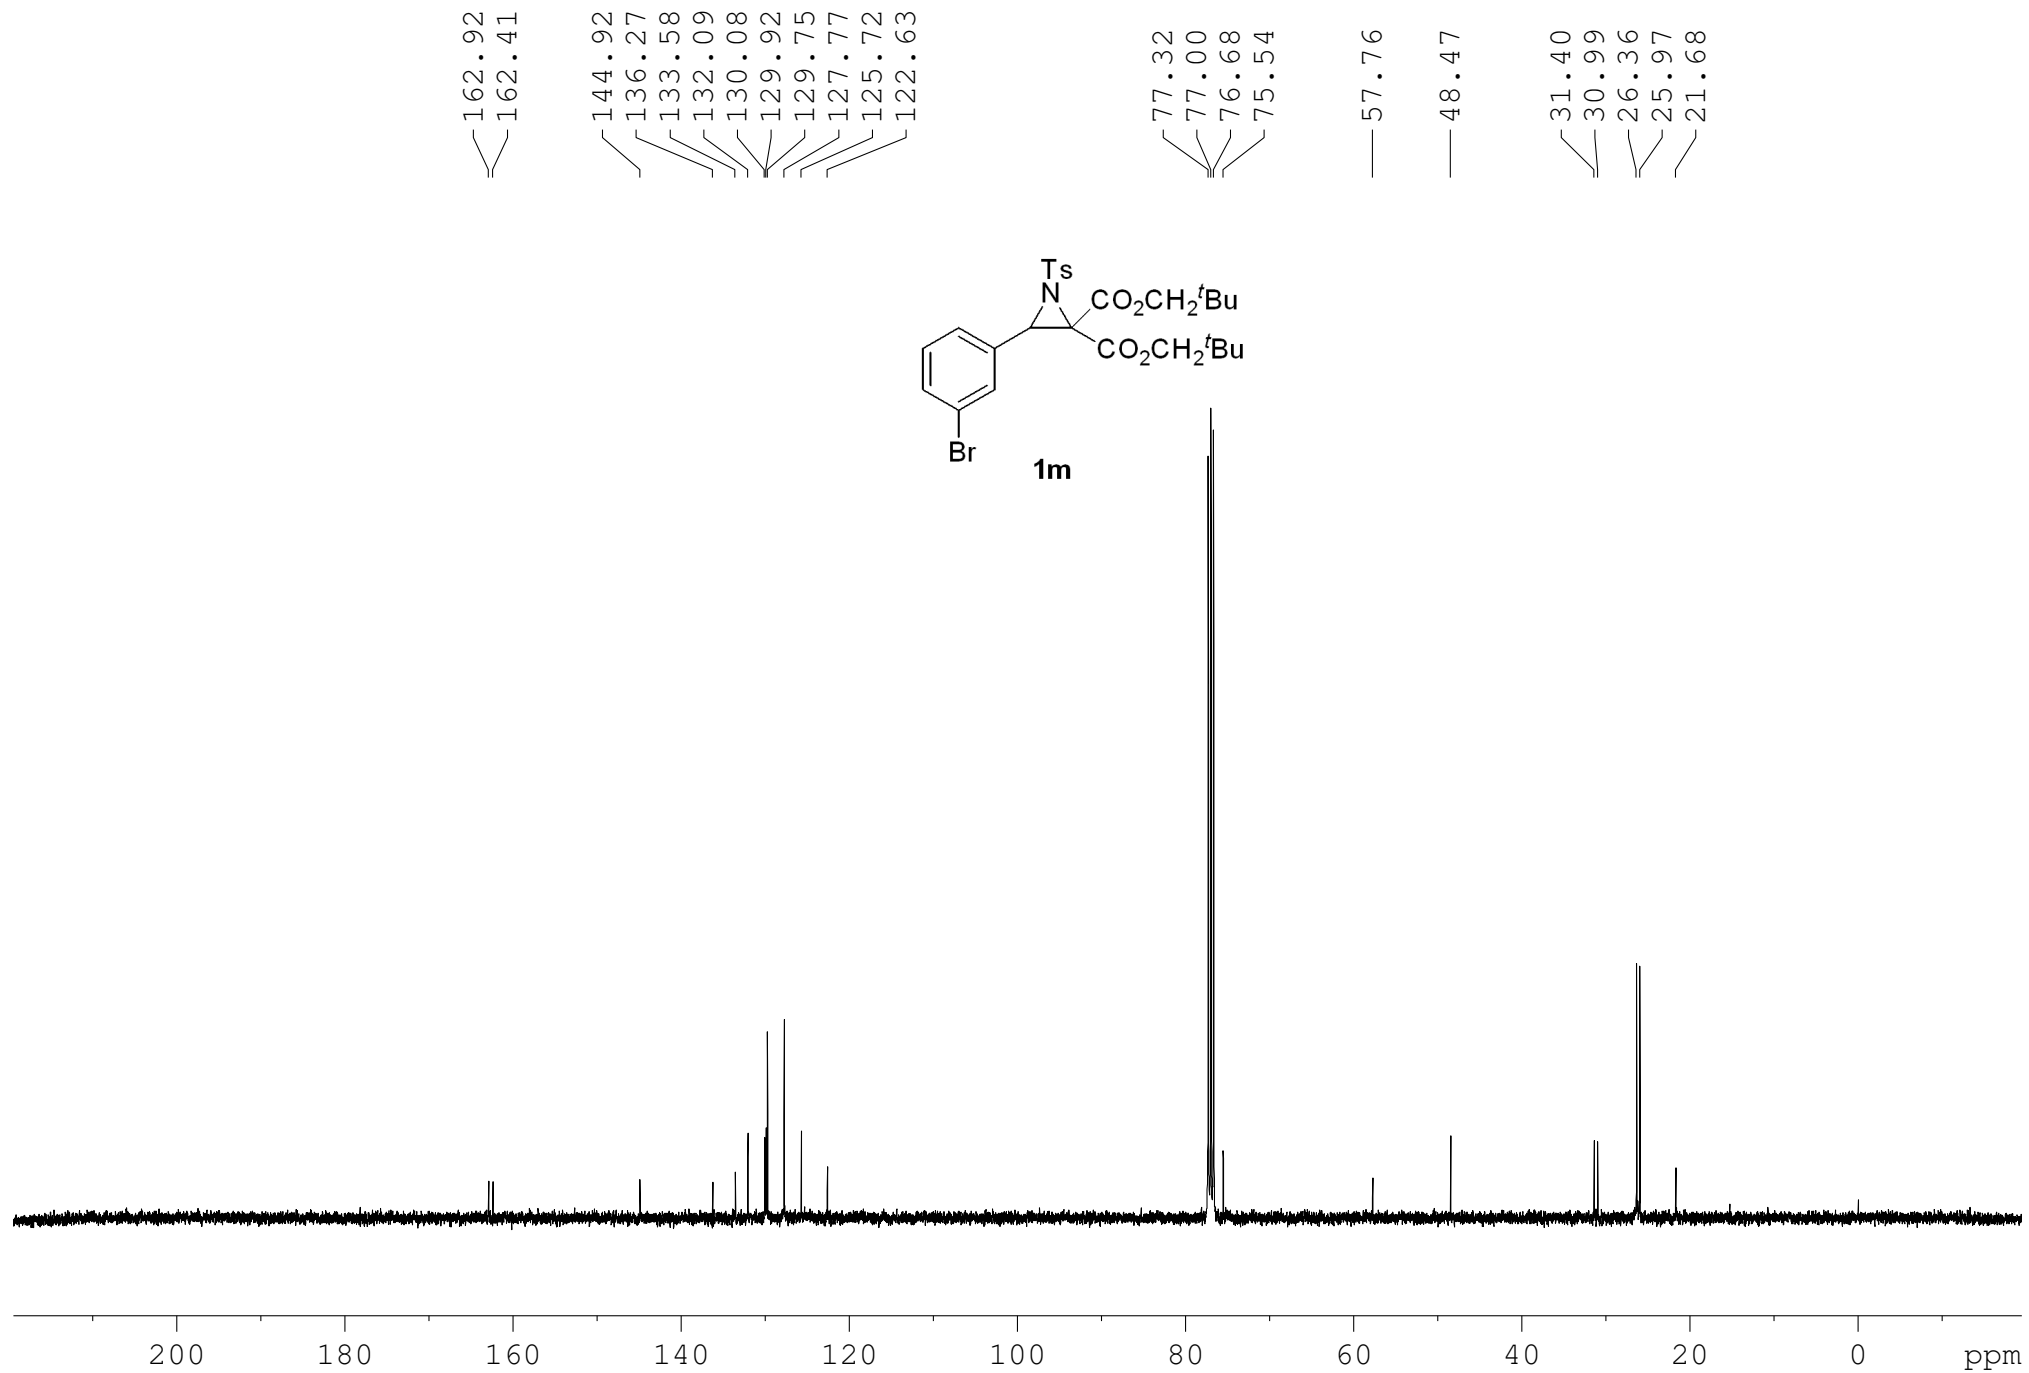

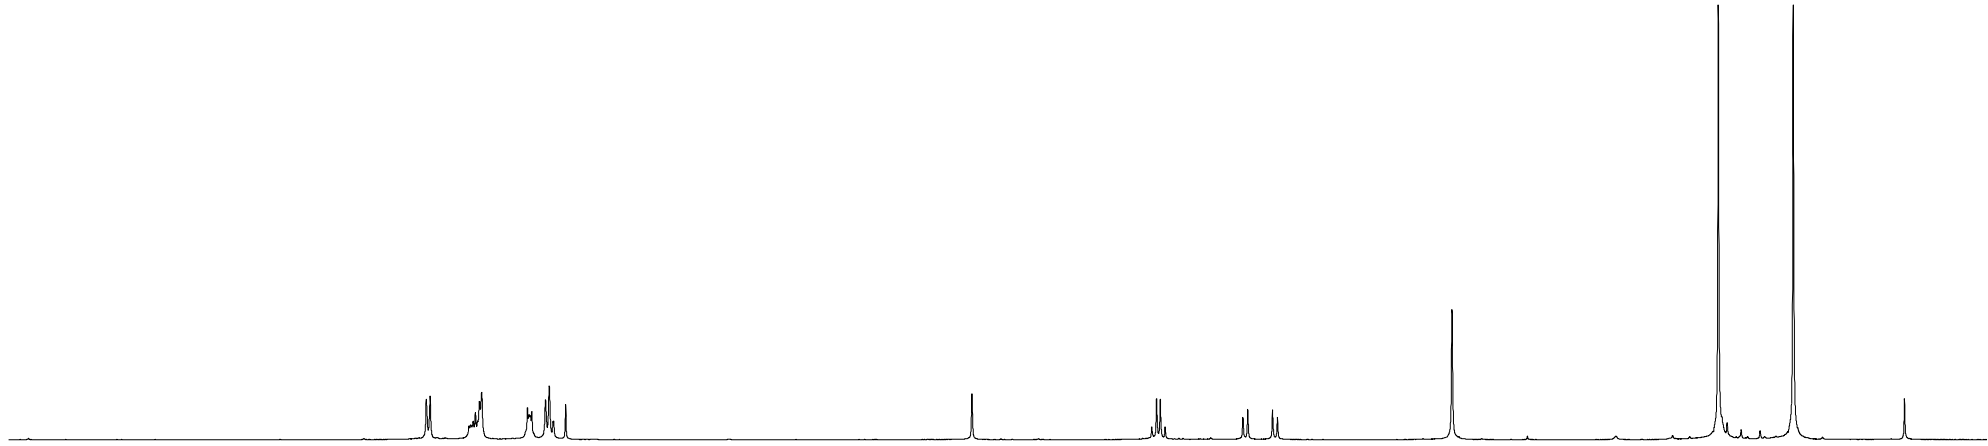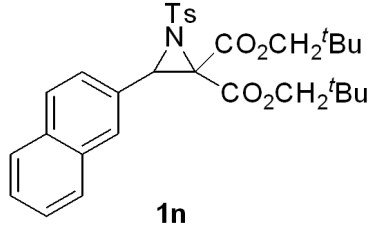

8.013  
7.992  
7.758  
7.747  
7.735  
7.725  
7.712  
7.465  
7.458  
7.455  
7.451  
7.448  
7.441  
7.367  
7.347  
7.326  
7.323  
7.258

— 5.055

4.080  
4.054  
4.034  
4.008  
3.586  
3.560  
3.425  
3.399

— 2.452

— 1.009

— 0.603

— 0.000

10 9 8 7 6 5 4 3 2 1 ppm

2.06 3.89 2.12 2.92 1.00 2.08 1.00 0.99 3.06 9.28 8.87

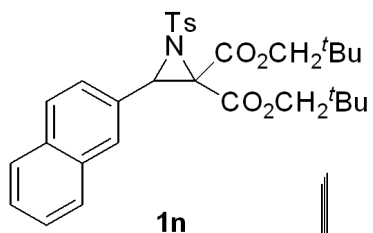

163.24  
162.67  
144.71  
136.61  
133.42  
132.91  
129.69  
128.65  
128.39  
127.98  
127.78  
127.66  
126.53  
126.49  
126.40  
124.04

77.31  
77.00  
76.68  
76.57  
75.36

57.94  
49.79

31.42  
30.91  
26.39  
25.88  
21.67

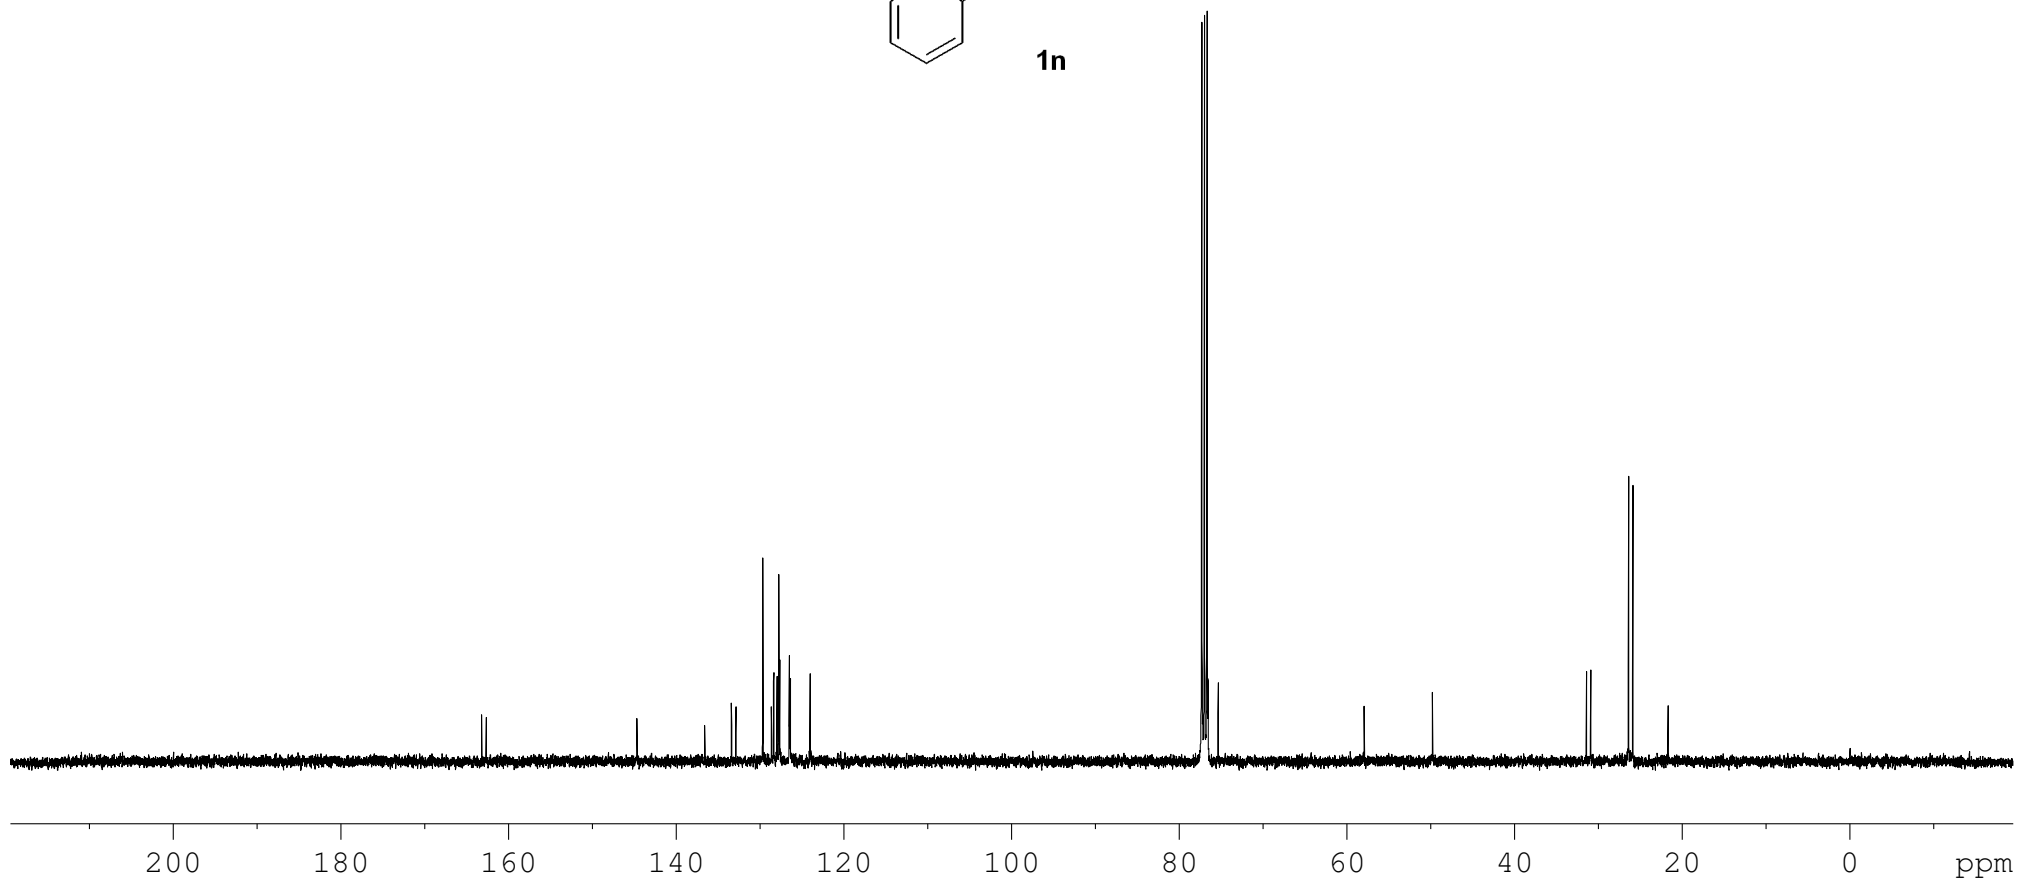



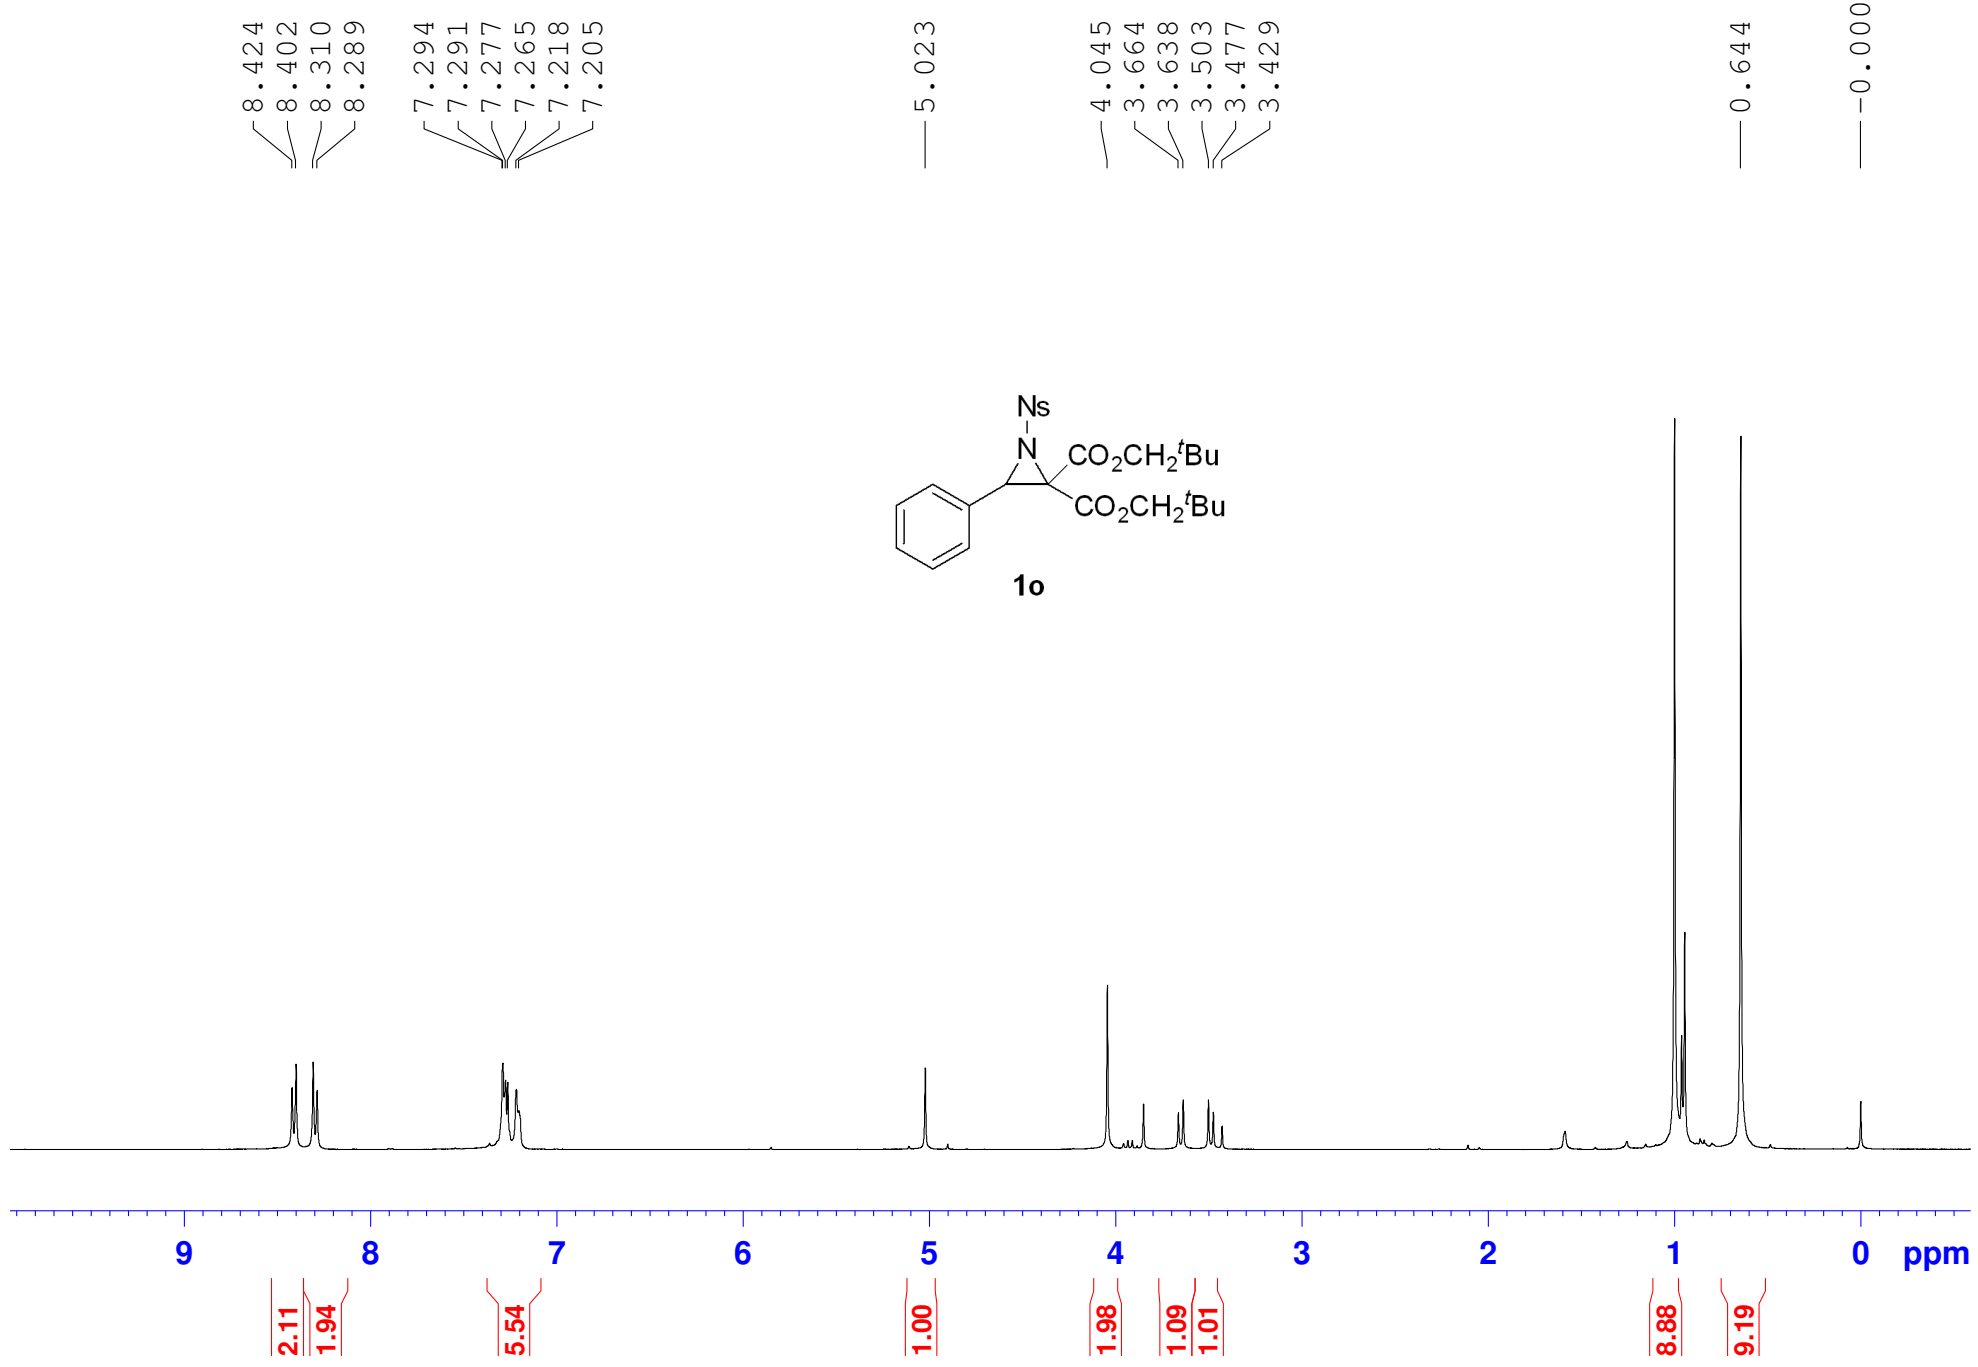

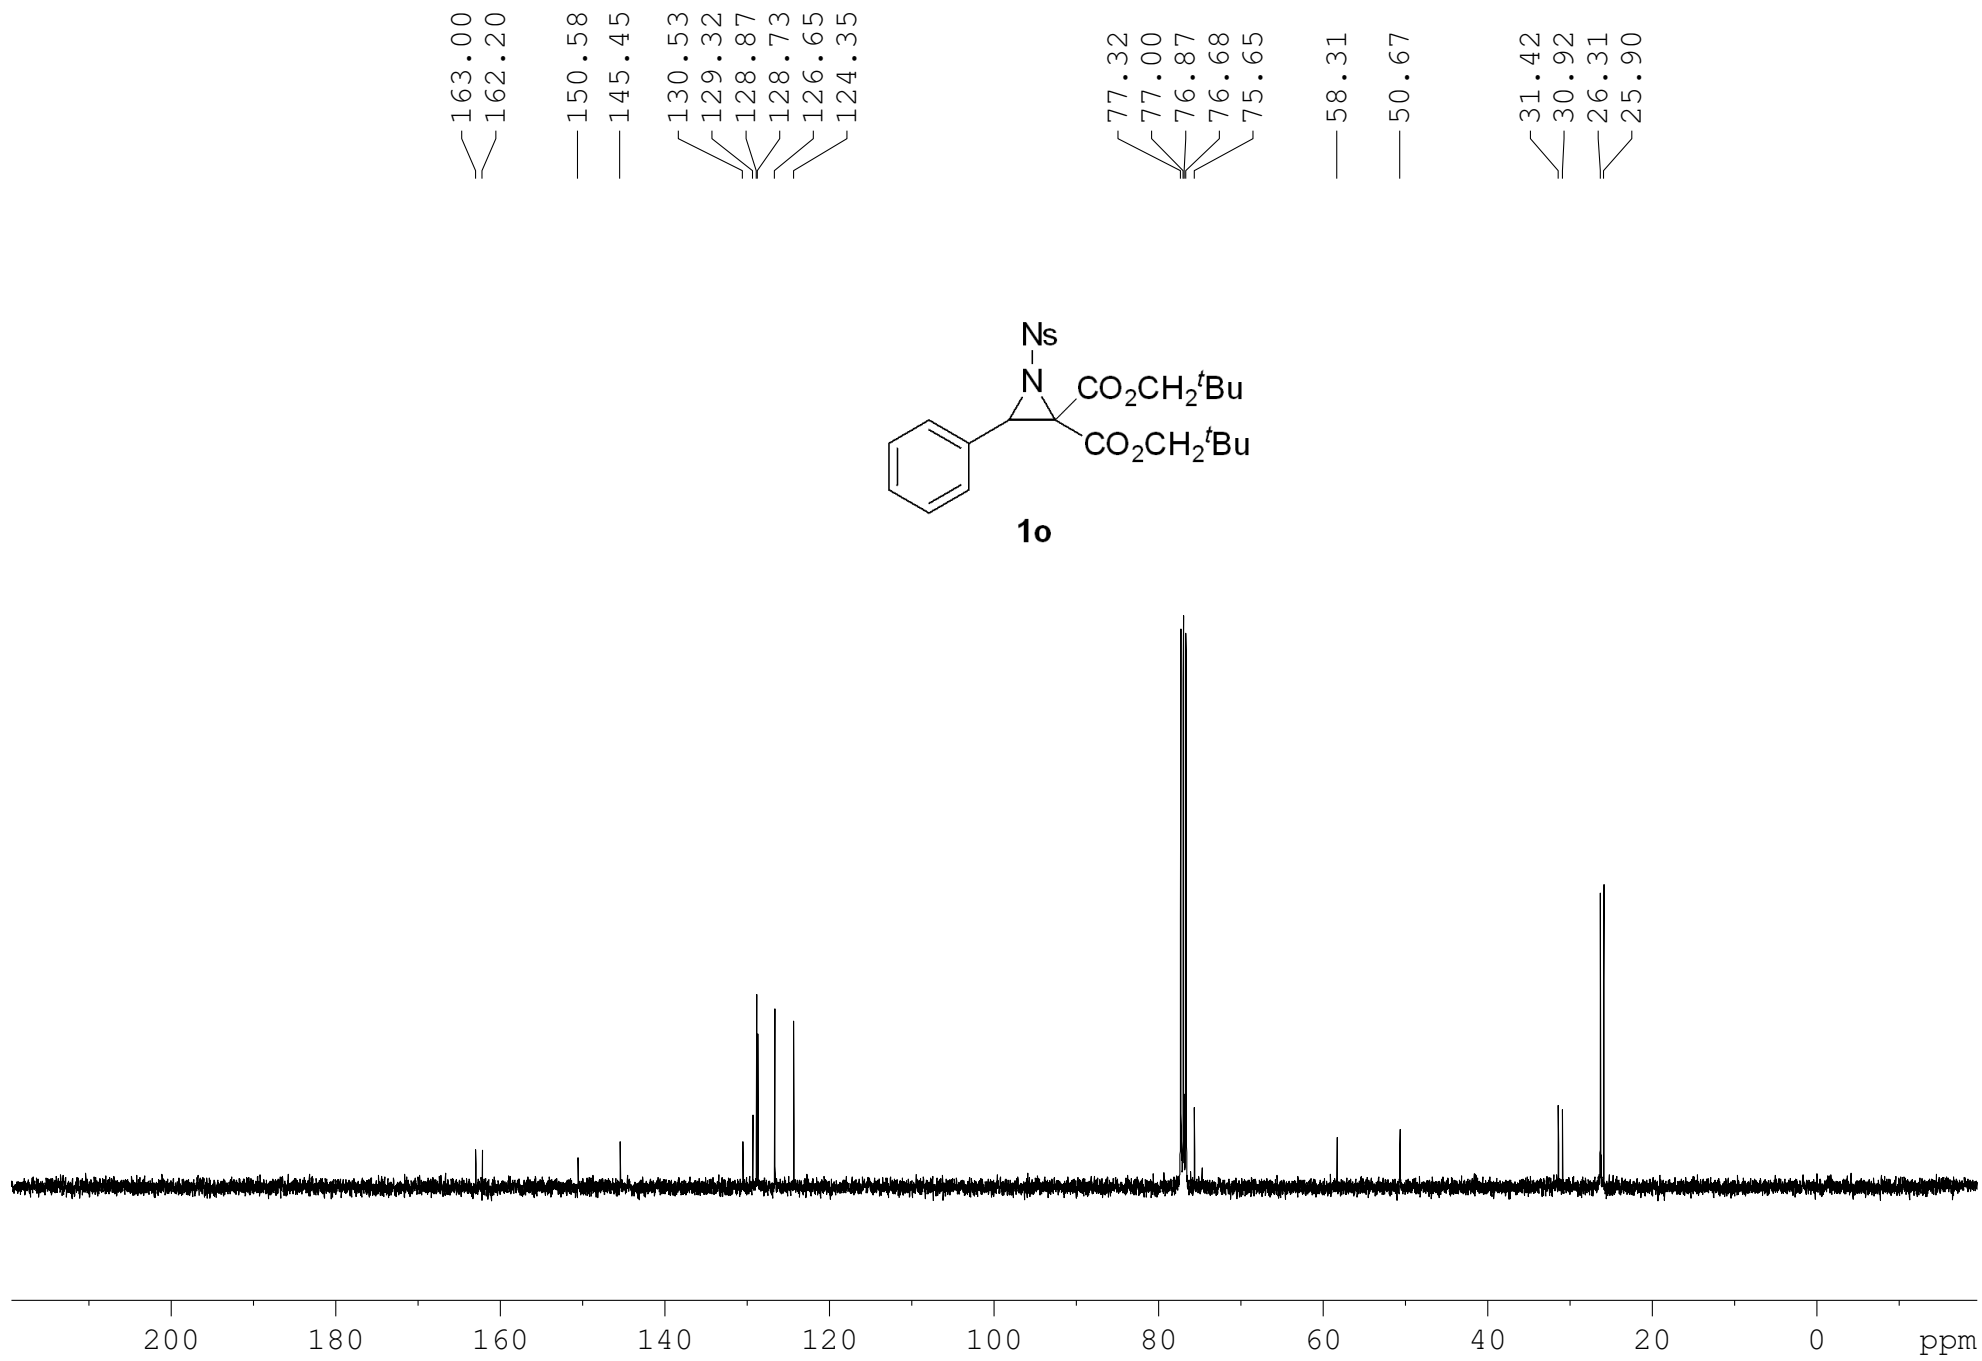

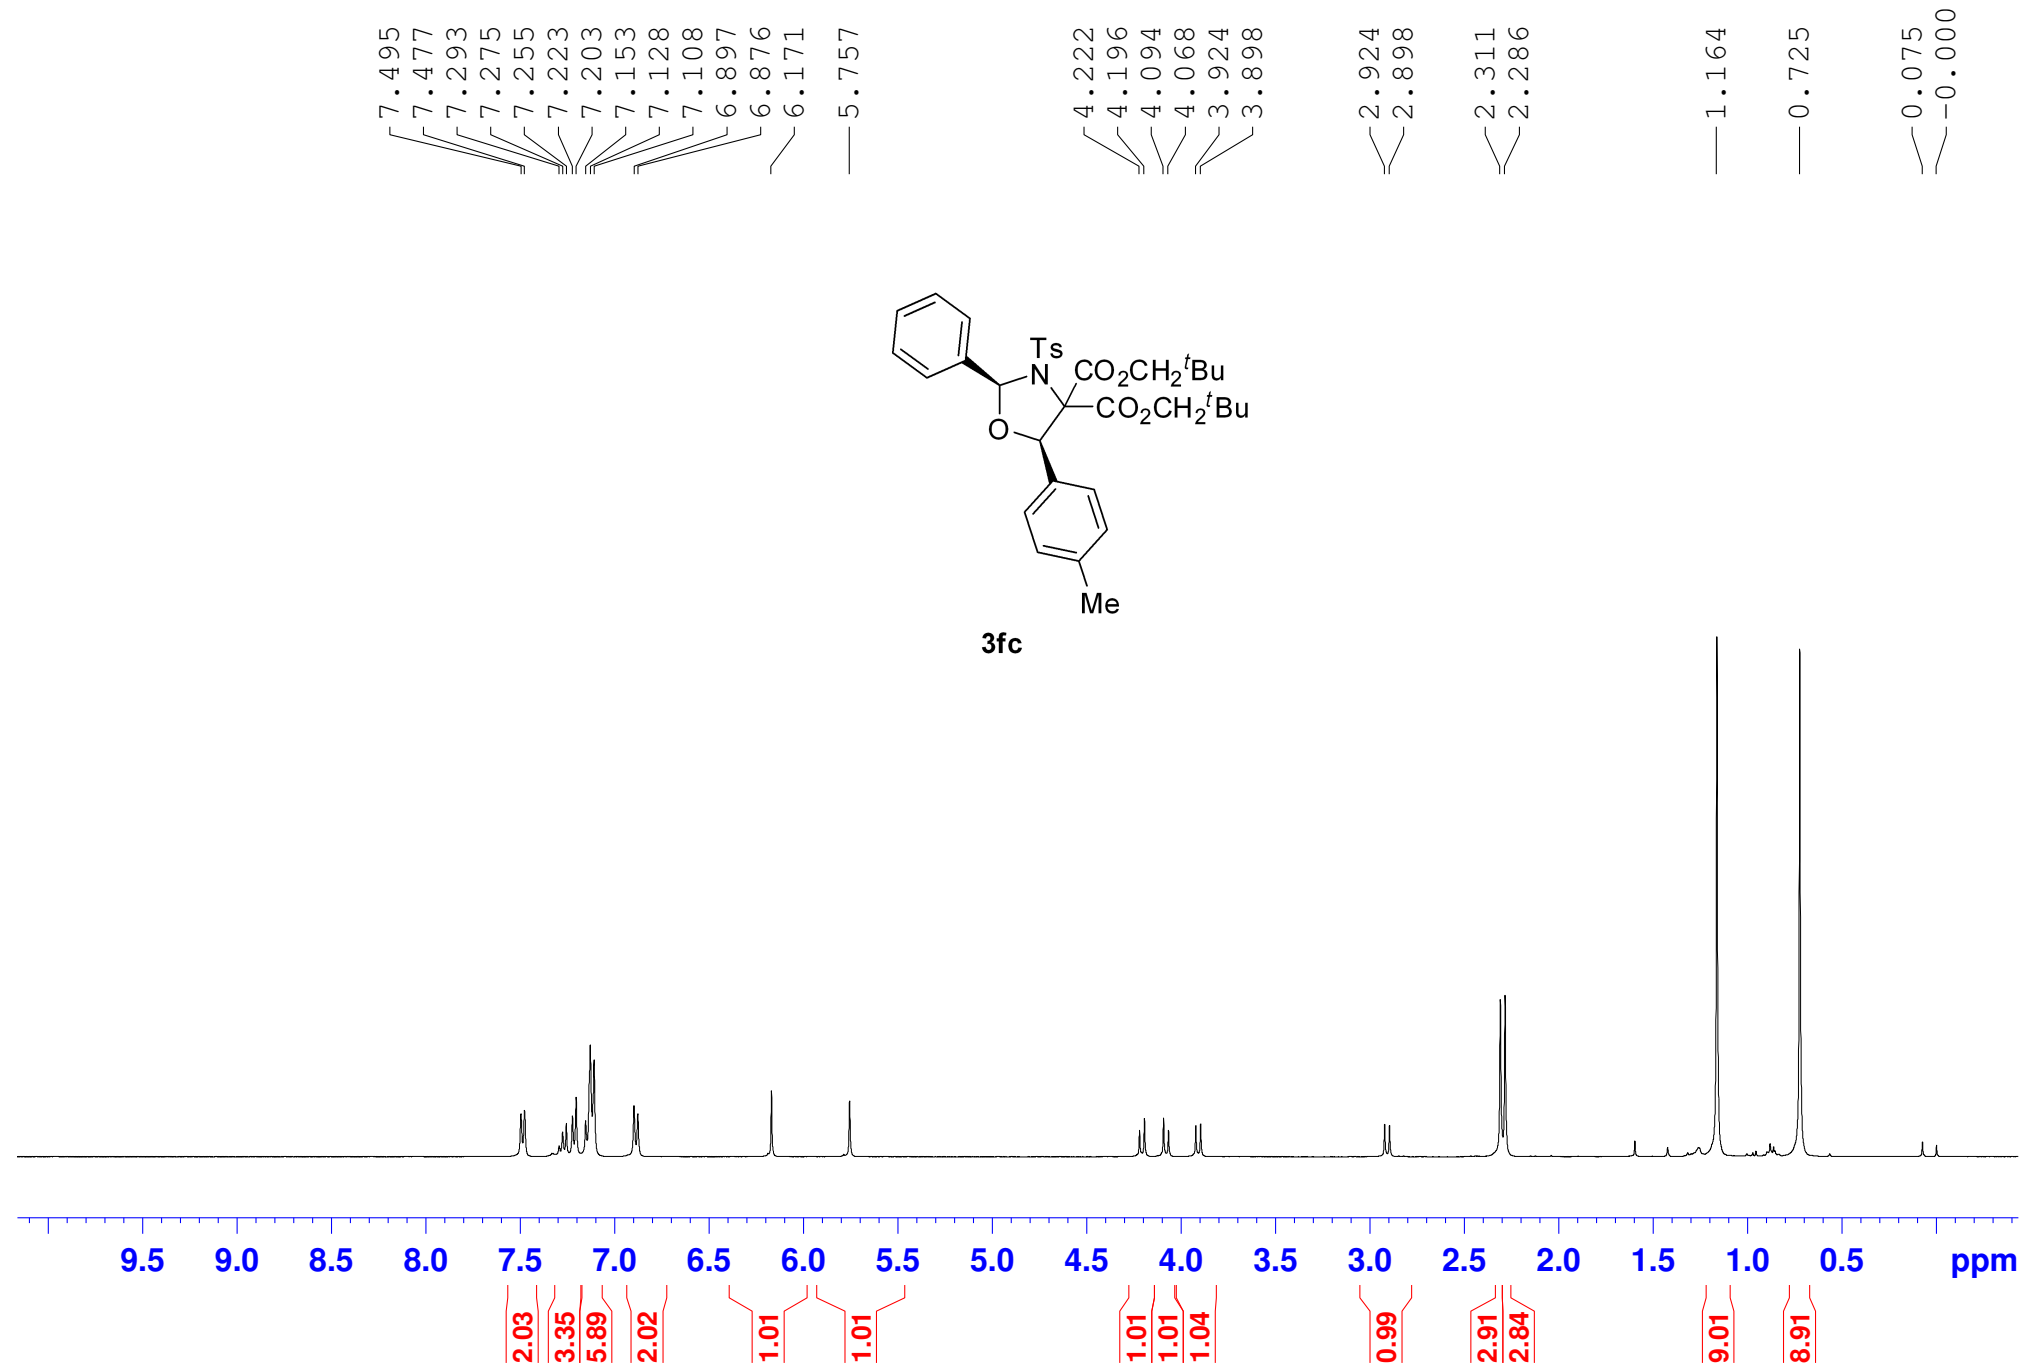

166.90  
166.60

142.66  
138.91  
137.61  
133.73  
131.31  
129.85  
129.01  
128.25  
128.16  
127.86  
126.49

92.69  
87.31  
77.43  
77.32  
77.00  
76.68  
76.22  
75.82

31.56  
30.89  
26.76  
26.16  
21.40  
21.16

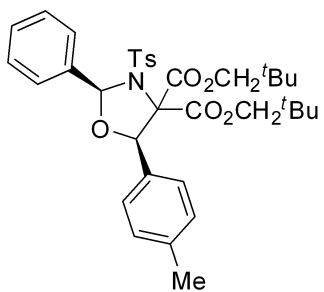

3c

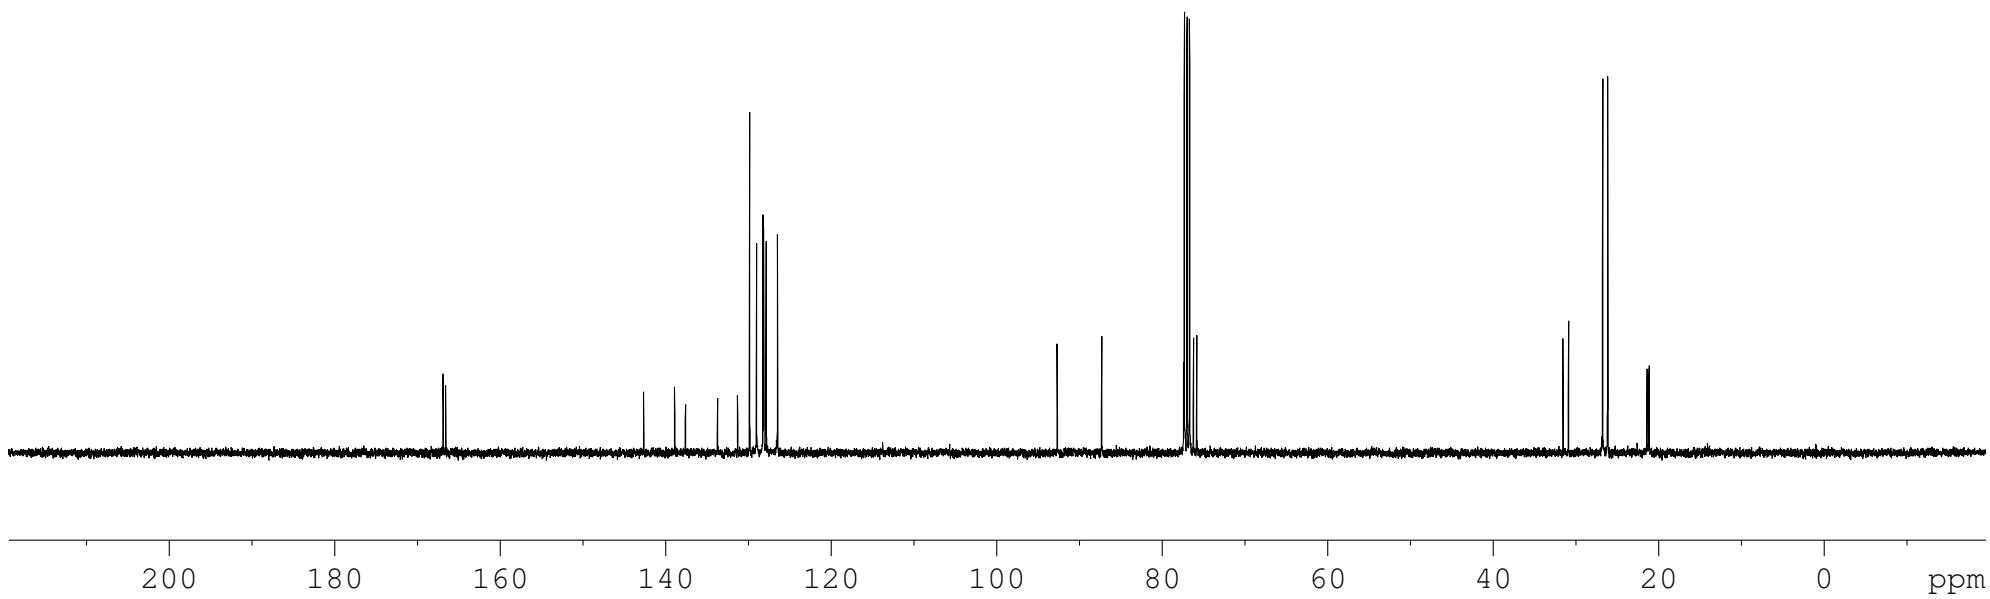

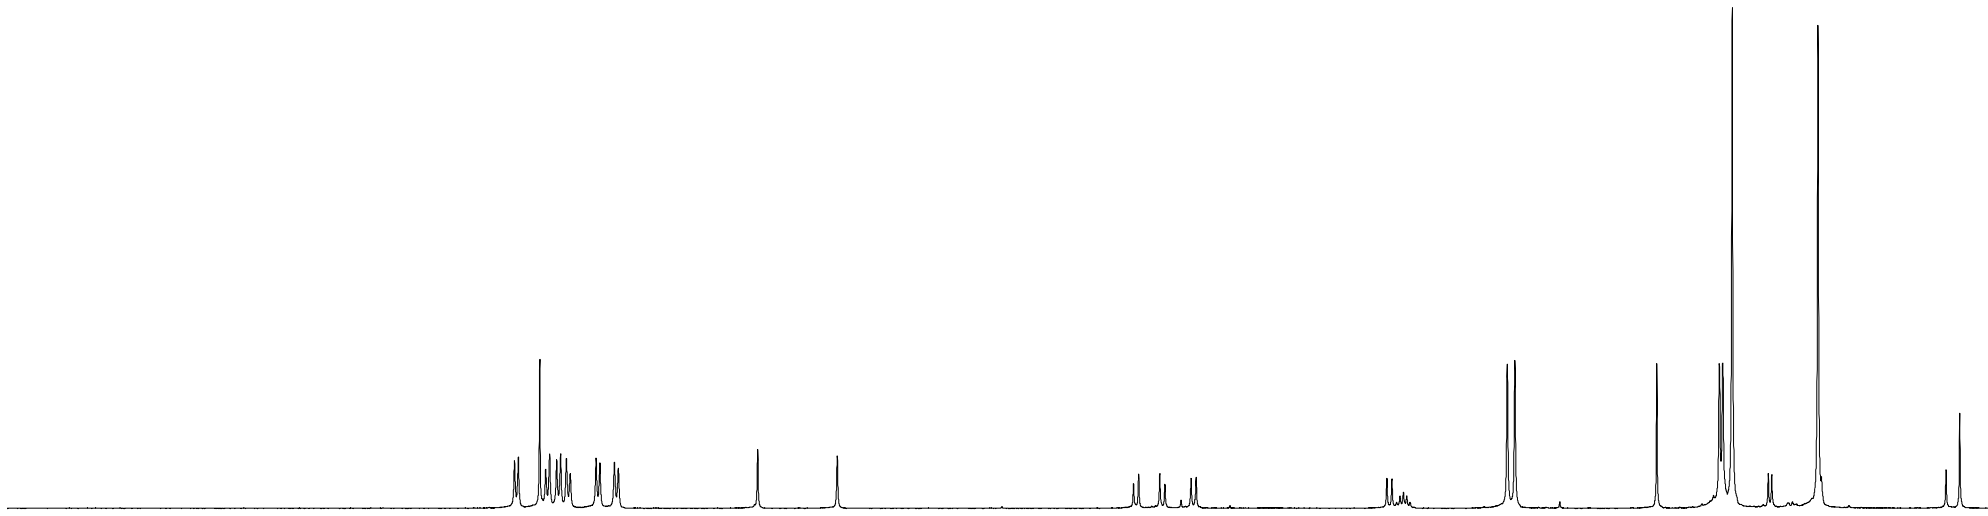

9.5 9.0 8.5 8.0 7.5 7.0 6.5 6.0 5.5 5.0 4.5 4.0 3.5 3.0 2.5 2.0 1.5 1.0 0.5 ppm

2.14  
2.07  
2.16  
1.89  
2.11  
2.00  
1.00  
1.01  
1.05  
1.11  
1.09  
0.99  
1.09  
3.07  
2.97  
3.14  
3.13  
9.06  
9.02

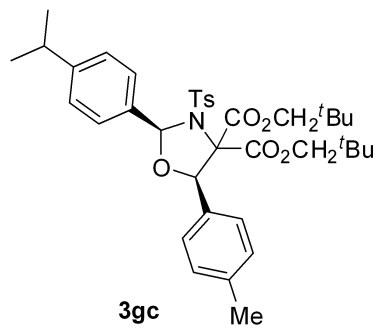

7.389  
7.369  
7.260  
7.230  
7.210  
7.174  
7.153  
7.124  
7.104  
6.972  
6.952  
6.879  
6.858  
6.146  
5.739

4.224  
4.198  
4.090  
4.064  
3.930  
3.904  
2.929  
2.903  
2.879  
2.862  
2.845  
2.828  
2.811  
2.314  
2.275

1.230  
1.213  
1.164  
0.725  
0.070  
0.000

166.95  
166.69

150.84  
142.32  
138.84  
137.84  
131.46  
131.00  
129.76  
128.99  
128.25  
128.20  
126.52  
125.88

92.50  
87.18  
77.52  
77.32  
77.00  
76.68  
76.18  
75.80

33.97  
31.58  
30.89  
26.78  
26.18  
24.11  
23.86  
21.38  
21.15

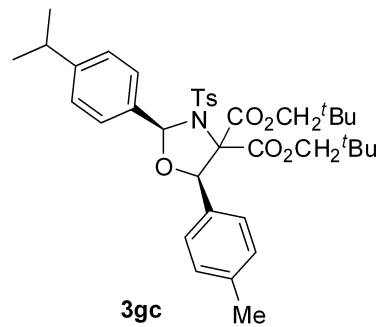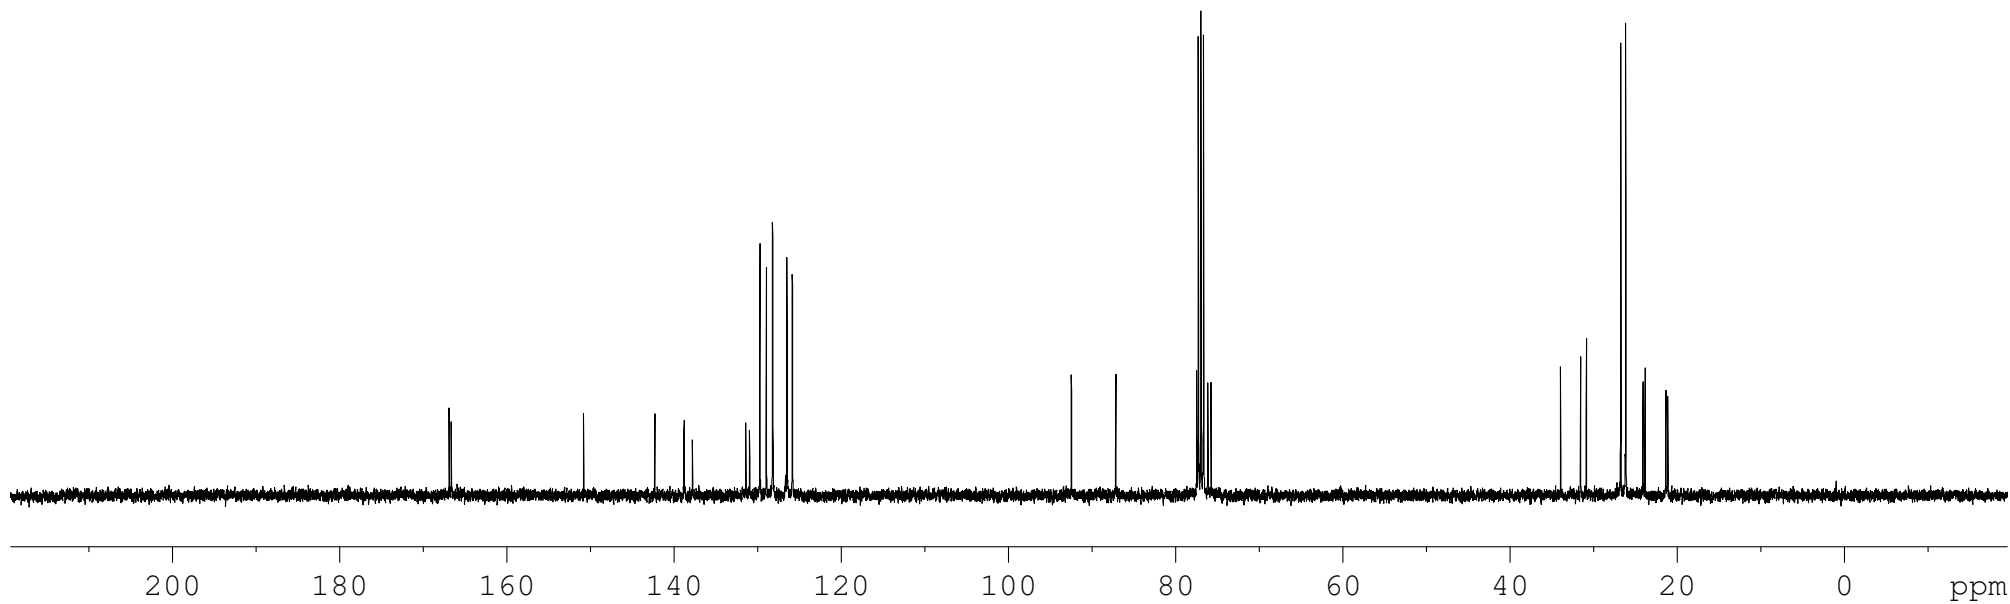

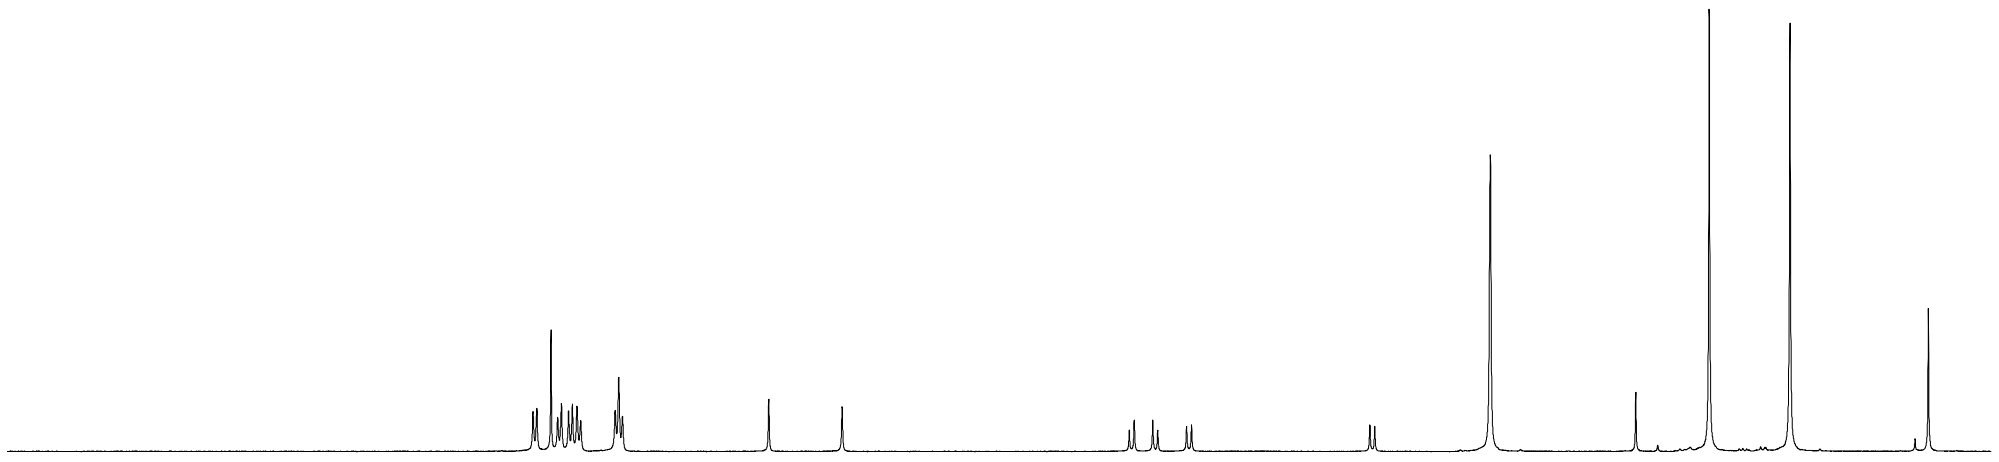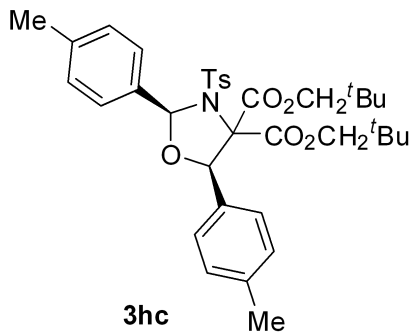

7.355  
7.335  
7.260  
7.225  
7.205  
7.168  
7.147  
7.123  
7.103  
6.922  
6.903  
6.883  
6.115  
— 5.728

4.213  
4.187  
4.090  
4.064  
3.911  
3.885

2.945  
2.919

— 2.309

— 1.155

— 0.730

— 0.000

9.5 9.0 8.5 8.0 7.5 7.0 6.5 6.0 5.5 5.0 4.5 4.0 3.5 3.0 2.5 2.0 1.5 1.0 0.5 ppm

2.12  
2.13  
3.97  
4.12  
1.00  
0.99  
1.04  
1.05  
1.08  
0.99  
9.39  
9.53  
9.54

166.95  
166.61

142.48  
139.90  
138.79  
137.77  
131.42  
130.76  
129.68  
128.94  
128.41  
128.26  
128.08  
126.50

92.52  
87.16  
77.39  
77.32  
77.00  
76.68  
76.15  
75.76

31.54  
30.87  
26.73  
26.15  
21.35  
21.23  
21.11

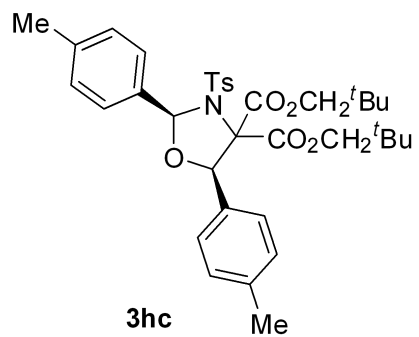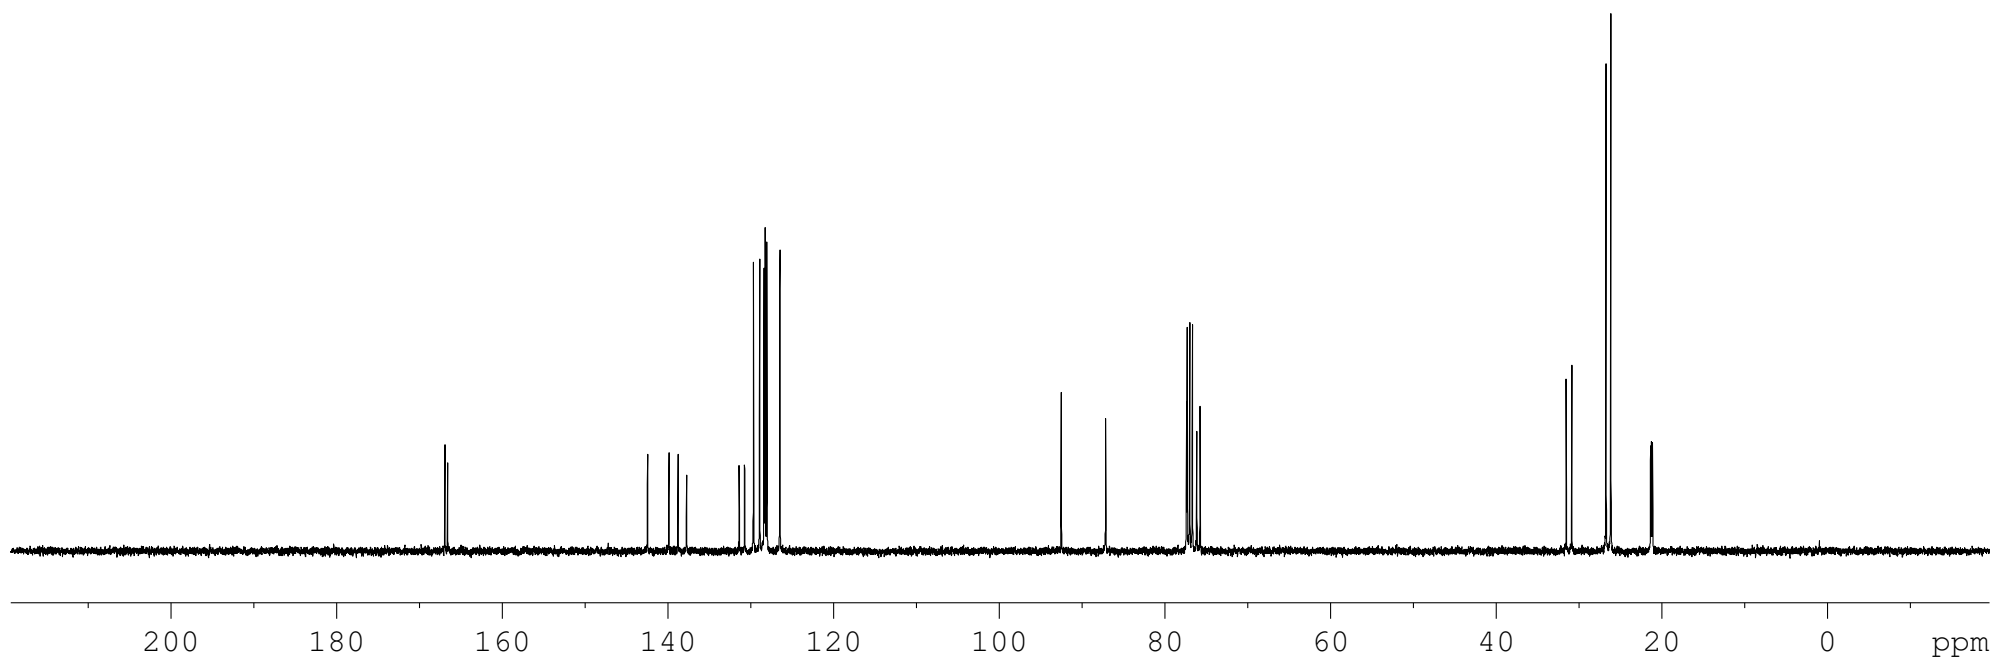



7.282  
7.272  
7.255  
7.236  
7.216  
7.207  
7.177  
7.157  
7.128  
7.109  
7.059  
7.048  
6.907  
6.887  
6.109  
5.720

4.222  
4.196  
4.098  
4.072  
3.918  
3.892

2.958  
2.932

2.313  
2.296  
2.135

1.162

0.734

0.073  
-0.000

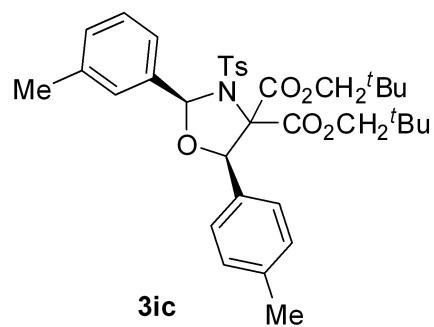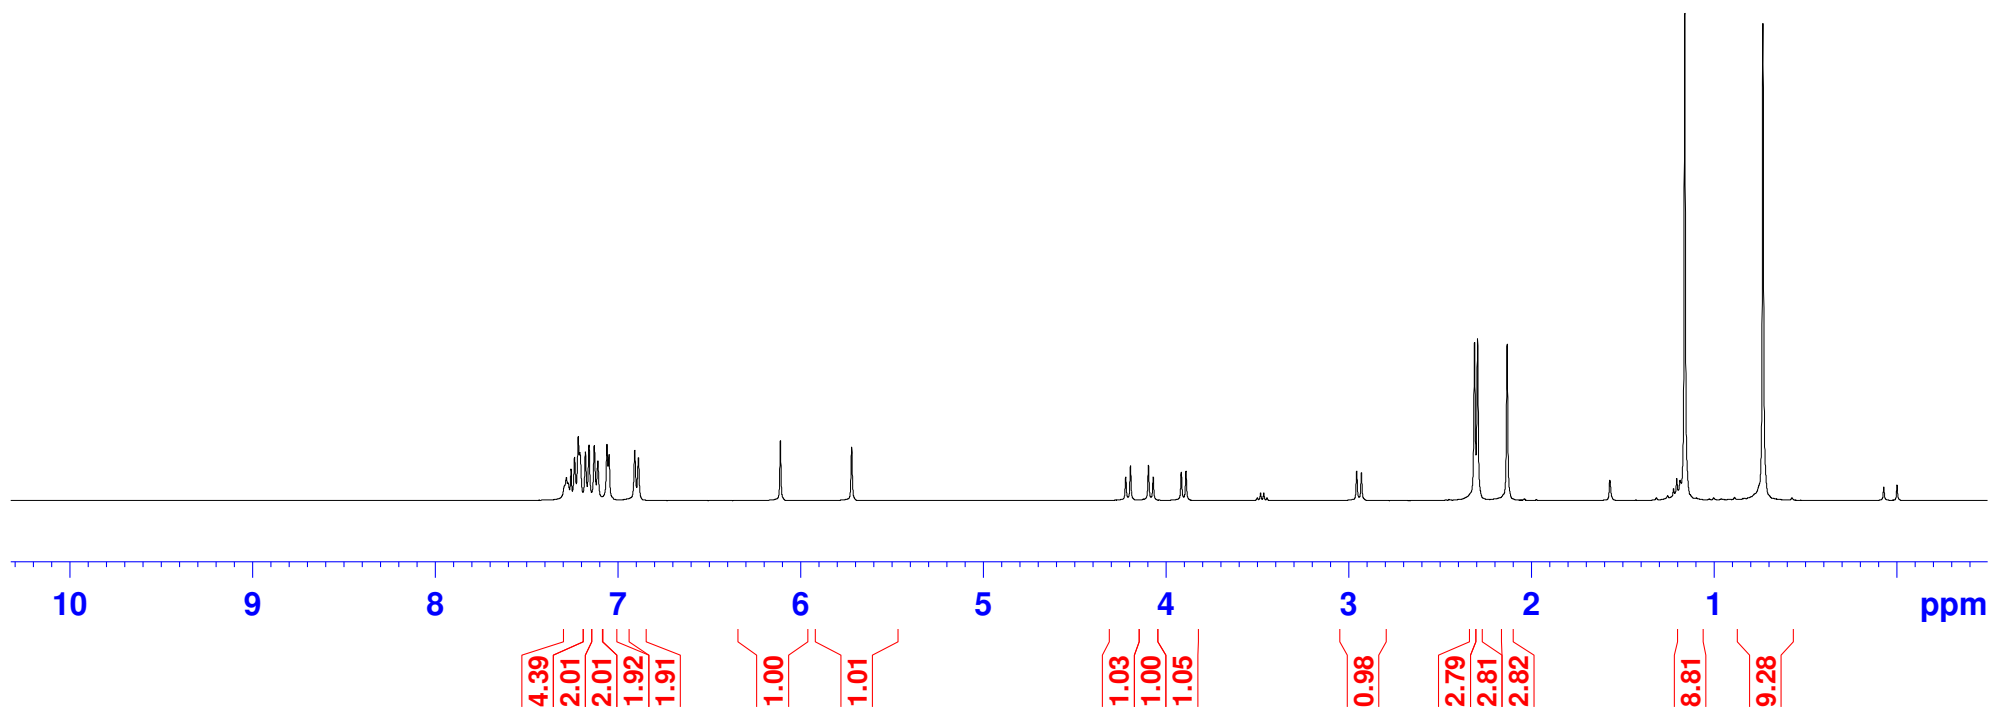

167.07  
166.58

142.53  
138.86  
137.72  
137.60  
133.29  
131.44  
130.67  
130.33  
128.98  
128.27  
128.14  
127.73  
127.19  
126.57

92.74  
87.23  
77.45  
77.32  
77.00  
76.69  
76.18  
75.81

31.59  
30.89  
26.77  
26.19  
21.33  
21.15  
21.04

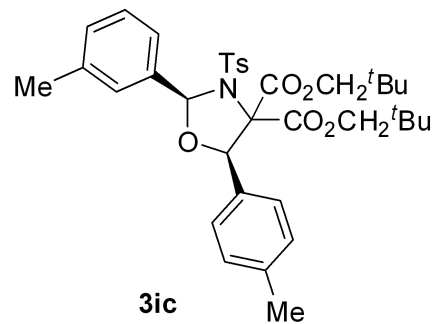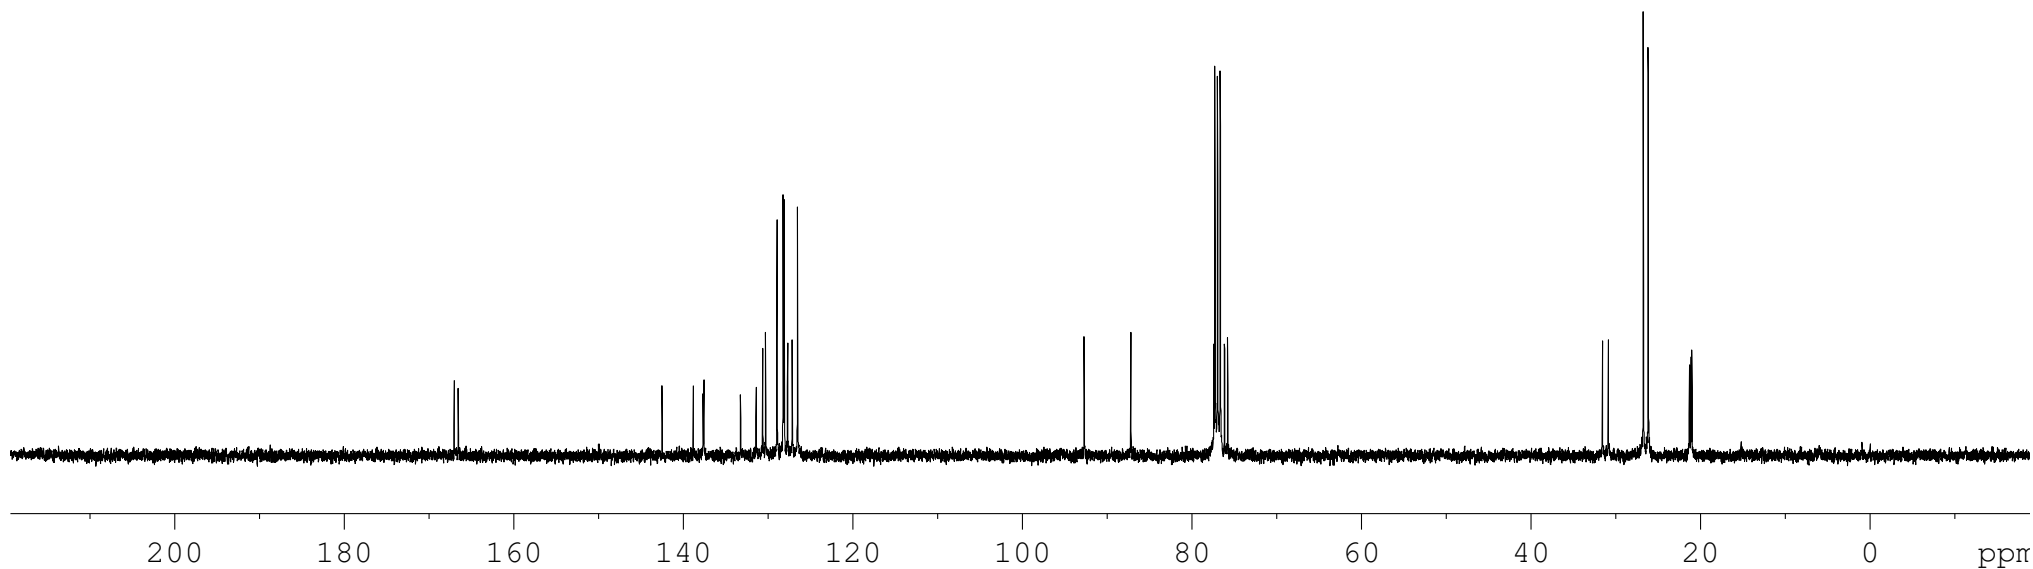

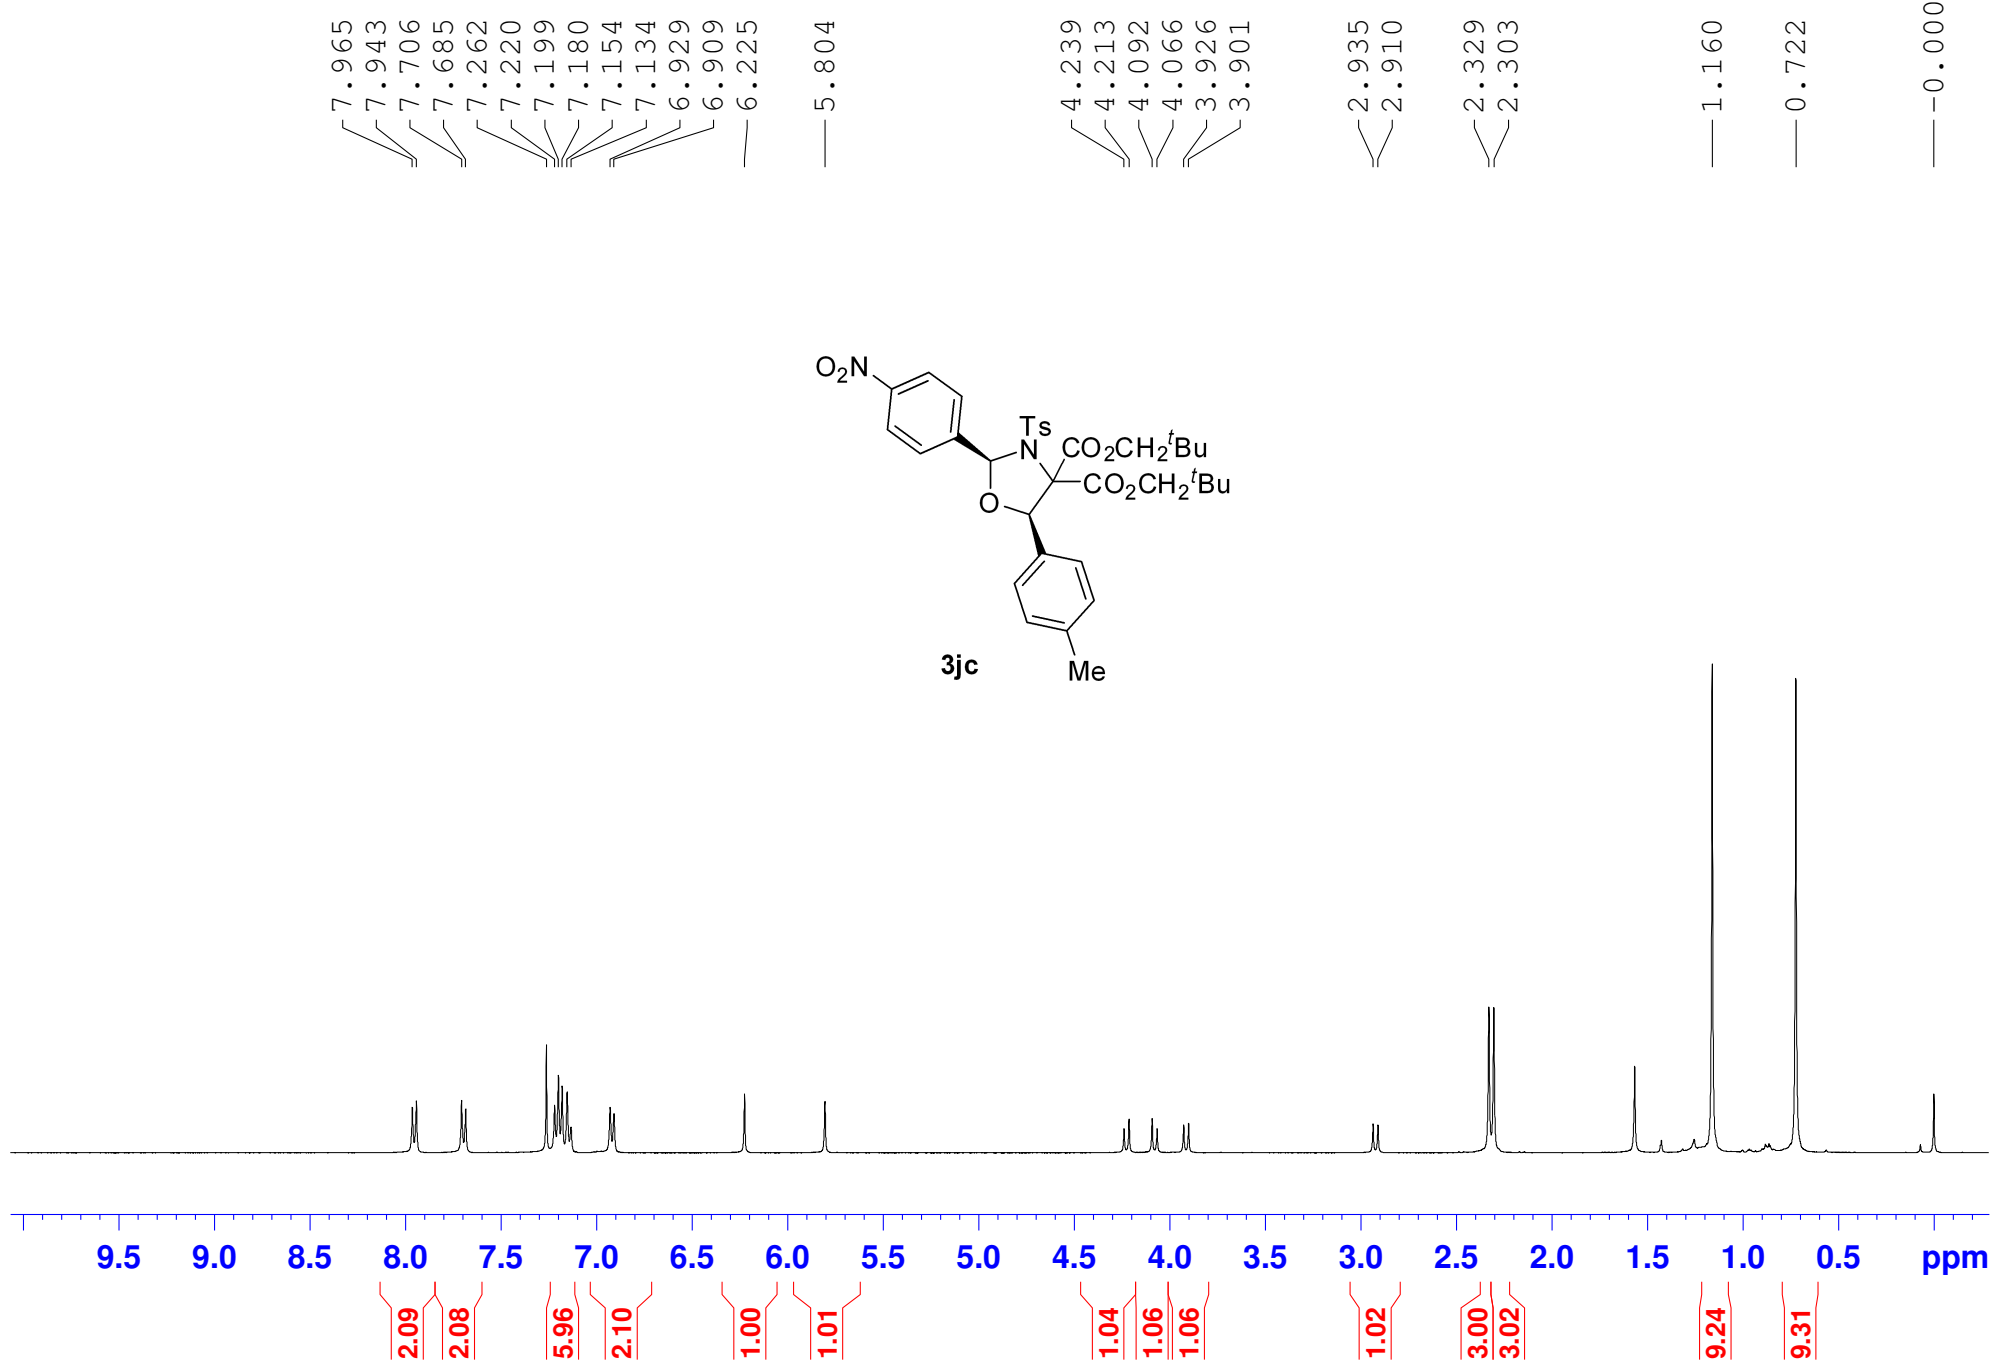

166.62  
166.27  
148.79  
143.77  
140.81  
139.30  
137.27  
130.86  
130.67  
129.17  
128.45  
128.18  
126.38  
122.84

91.06  
87.86  
77.36  
77.32  
77.00  
76.68  
76.44  
76.08

31.57  
30.89  
26.75  
26.12  
21.34  
21.15

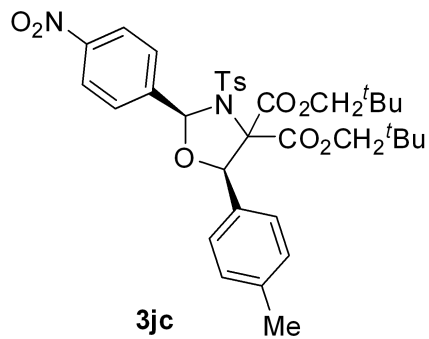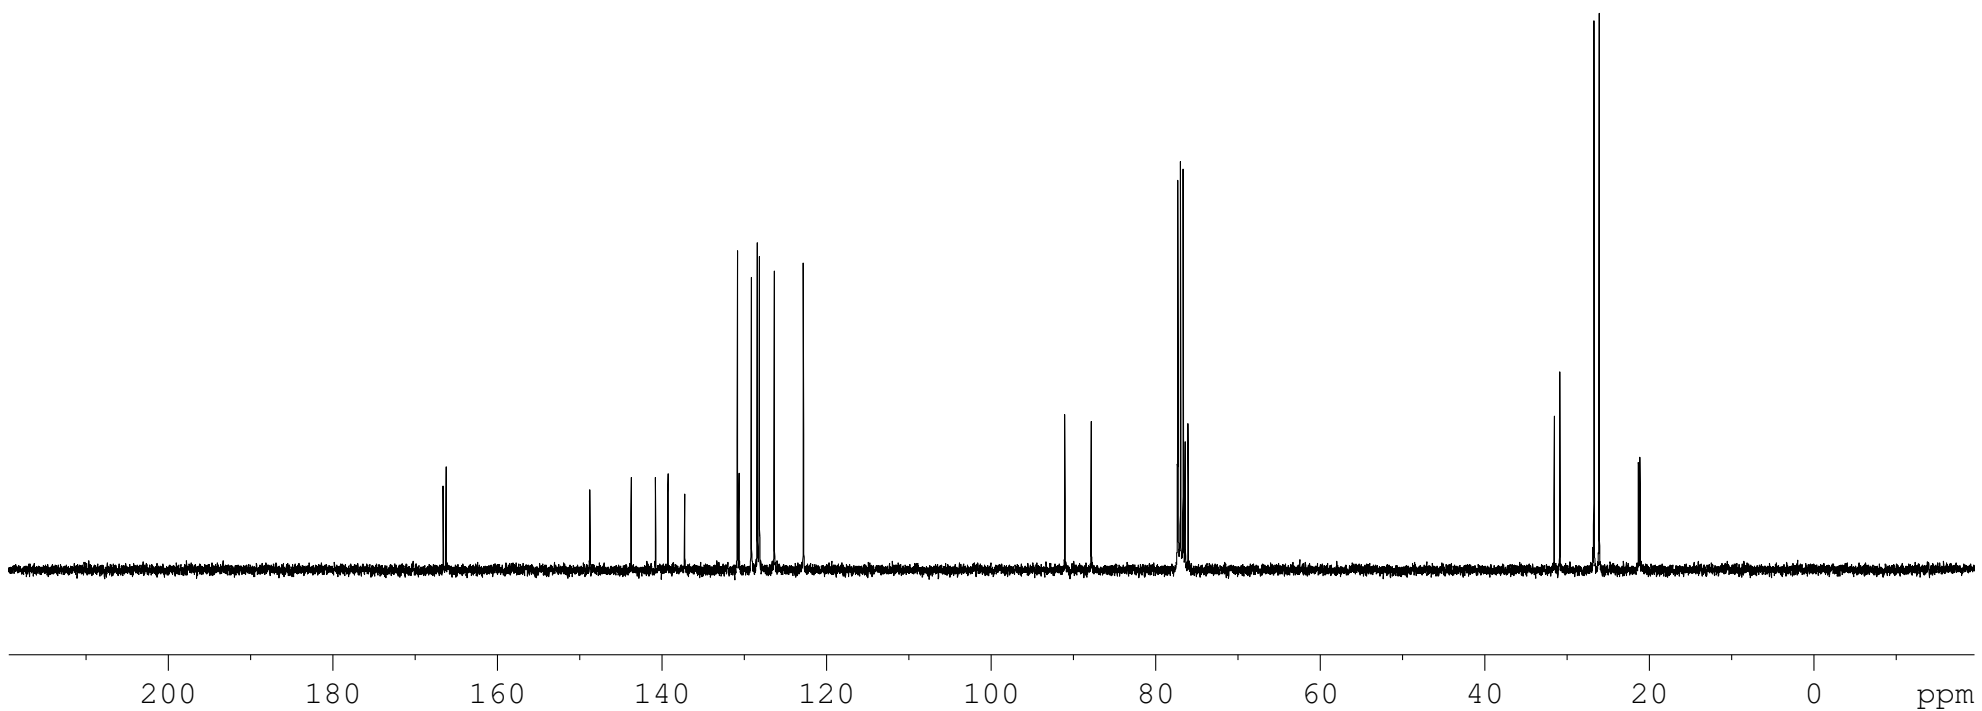

7.420  
7.399  
7.260  
7.204  
7.199  
7.184  
7.178  
7.135  
7.115  
7.077  
7.056  
6.968  
6.947  
6.118  
— 5.740

4.225  
4.199  
4.086  
4.060  
3.919  
3.893

2.925  
2.899

2.343  
2.318

— 1.157

— 0.722

0.071  
0.000

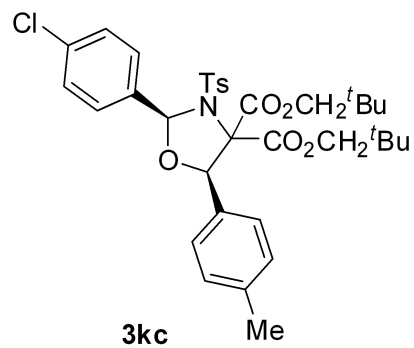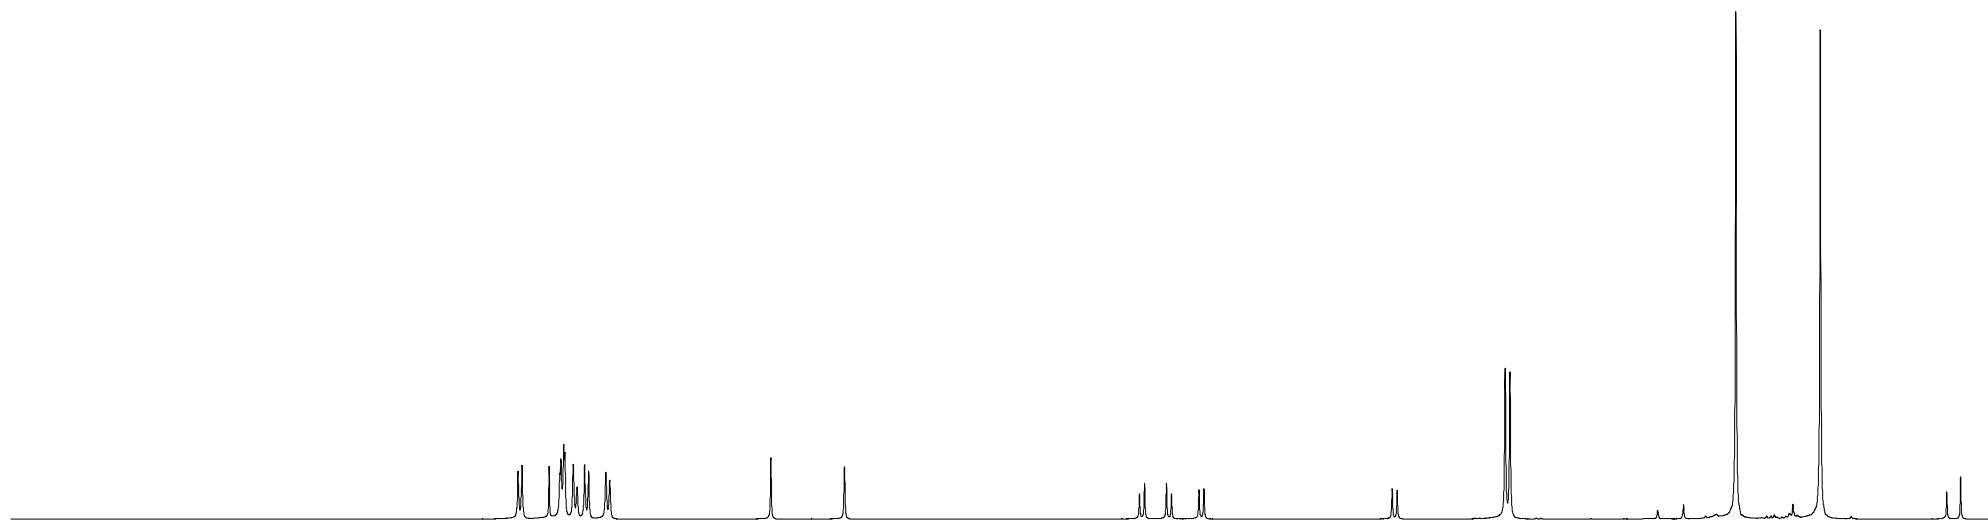

9.5 9.0 8.5 8.0 7.5 7.0 6.5 6.0 5.5 5.0 4.5 4.0 3.5 3.0 2.5 2.0 1.5 1.0 0.5 ppm

2.07  
4.00  
2.01  
1.97  
1.94  
1.00  
1.01  
1.06  
1.03  
1.02  
1.00  
2.94  
2.89  
8.99  
8.71

166.69  
166.65

143.14  
139.07  
137.52  
136.06  
132.35  
131.14  
131.06  
129.08  
128.37  
128.20  
128.01  
126.45

91.74  
87.40  
77.38  
77.32  
77.00  
76.68  
76.27  
75.94

31.58  
30.89  
26.76  
26.15  
21.42  
21.16

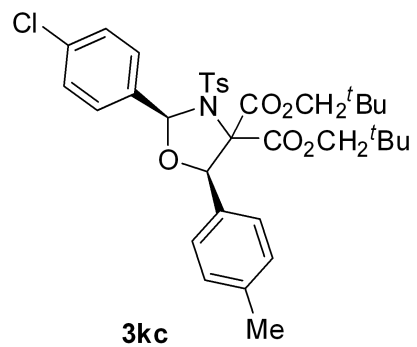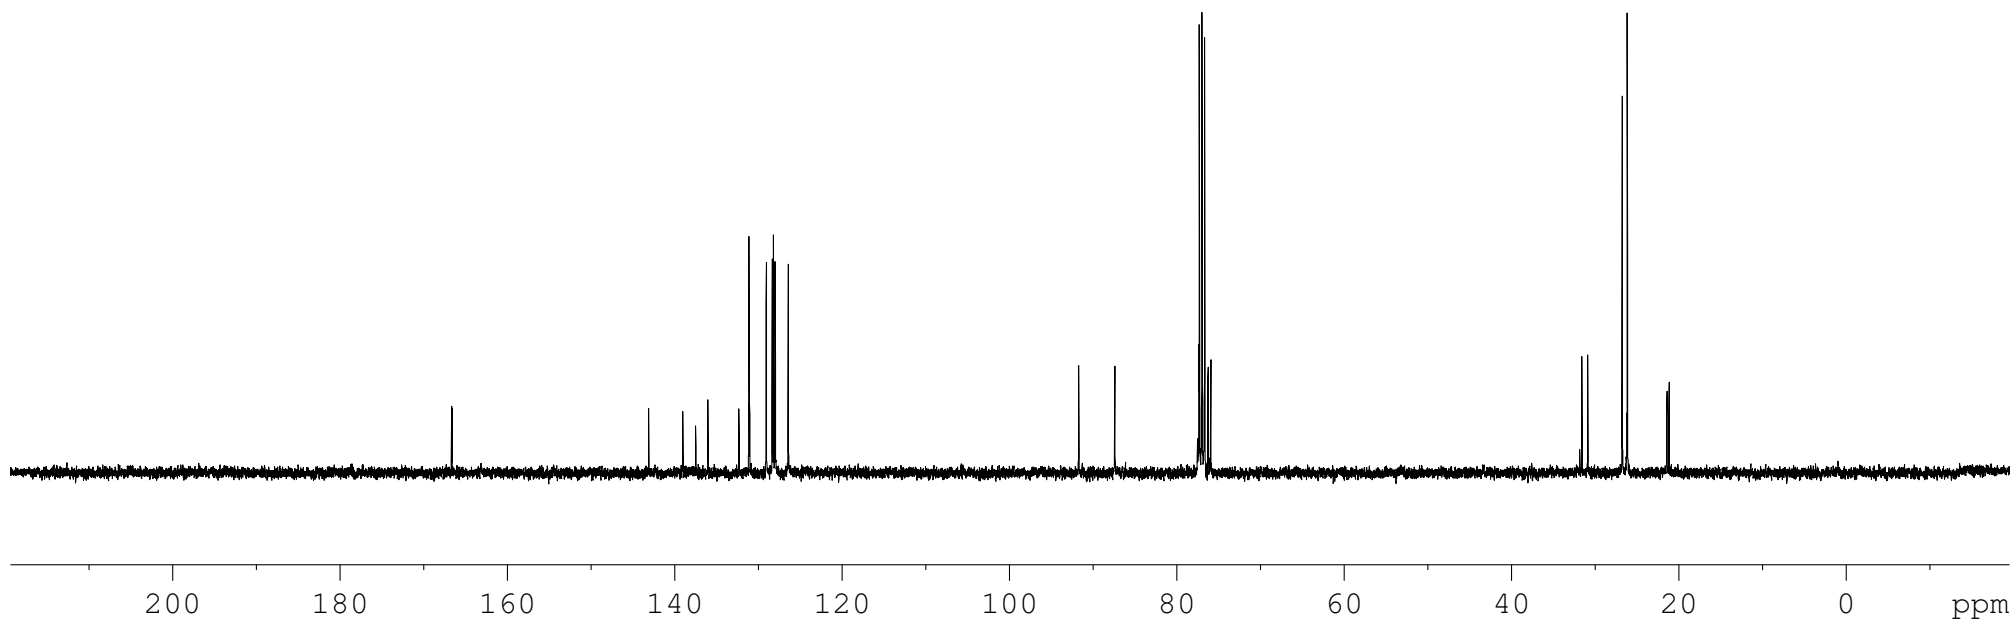

7.351  
7.330  
7.256  
7.225  
7.204  
7.183  
7.133  
7.113  
6.970  
6.950  
— 6.100  
— 5.735

4.224  
4.198  
4.086  
4.060  
3.918  
3.893

2.928  
2.903

2.352  
2.315

— 1.155

— 0.723

0.074  
0.000

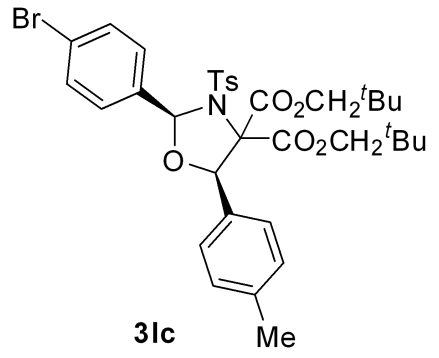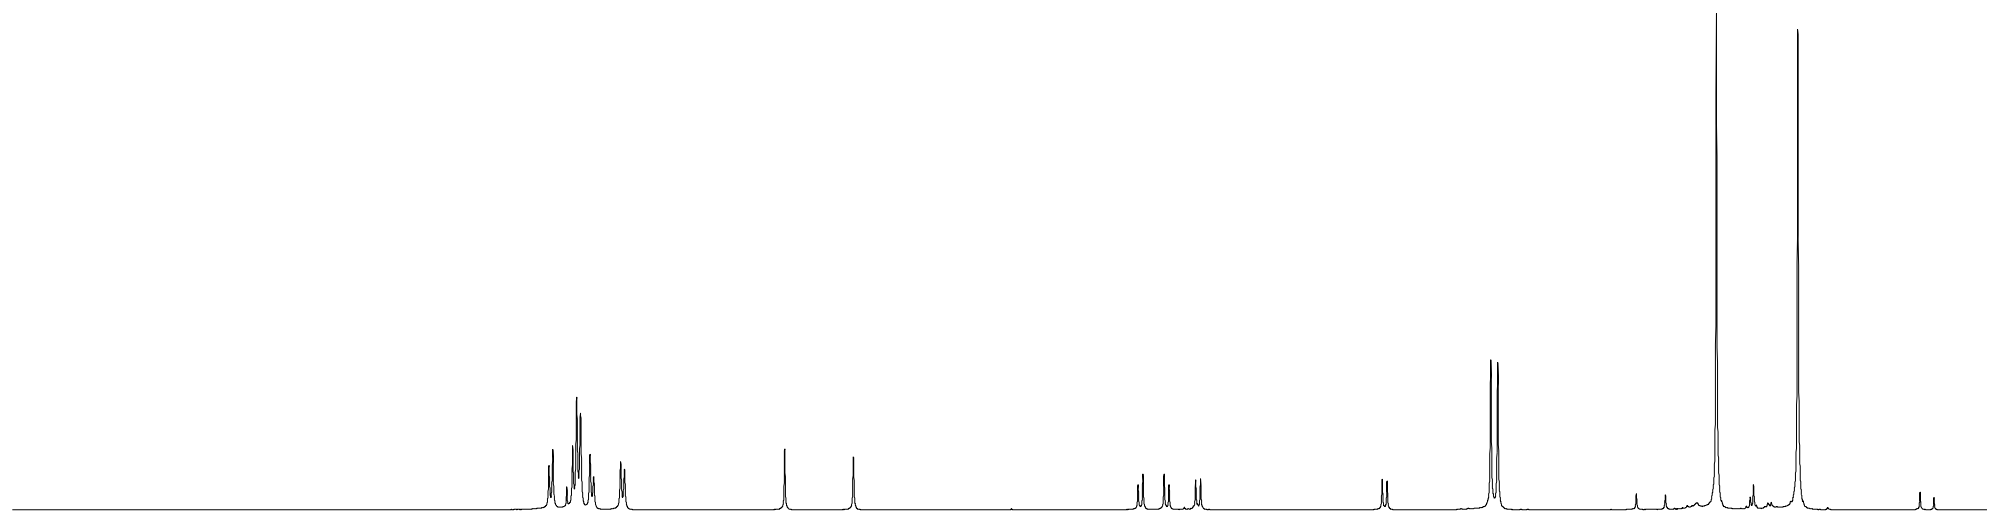

10.0 9.5 9.0 8.5 8.0 7.5 7.0 6.5 6.0 5.5 5.0 4.5 4.0 3.5 3.0 2.5 2.0 1.5 1.0 0.5 ppm

2.18  
5.80  
1.98  
1.93

1.00  
1.00

1.03  
1.00  
1.13

0.99

2.94  
2.80

8.63

8.76

166.68  
166.63

143.16  
139.06  
137.49  
132.81  
131.40  
131.04  
130.96  
129.06  
128.39  
128.19  
126.44  
124.43

91.77  
87.41  
77.37  
77.31  
77.00  
76.68  
76.26  
75.93

31.57  
30.87  
26.75  
26.14  
21.44  
21.14

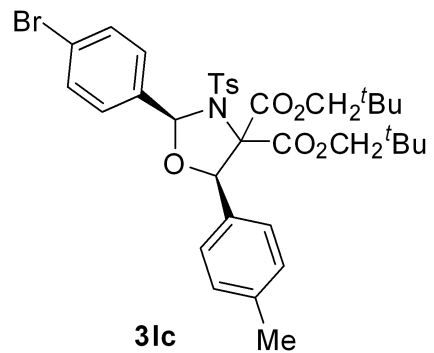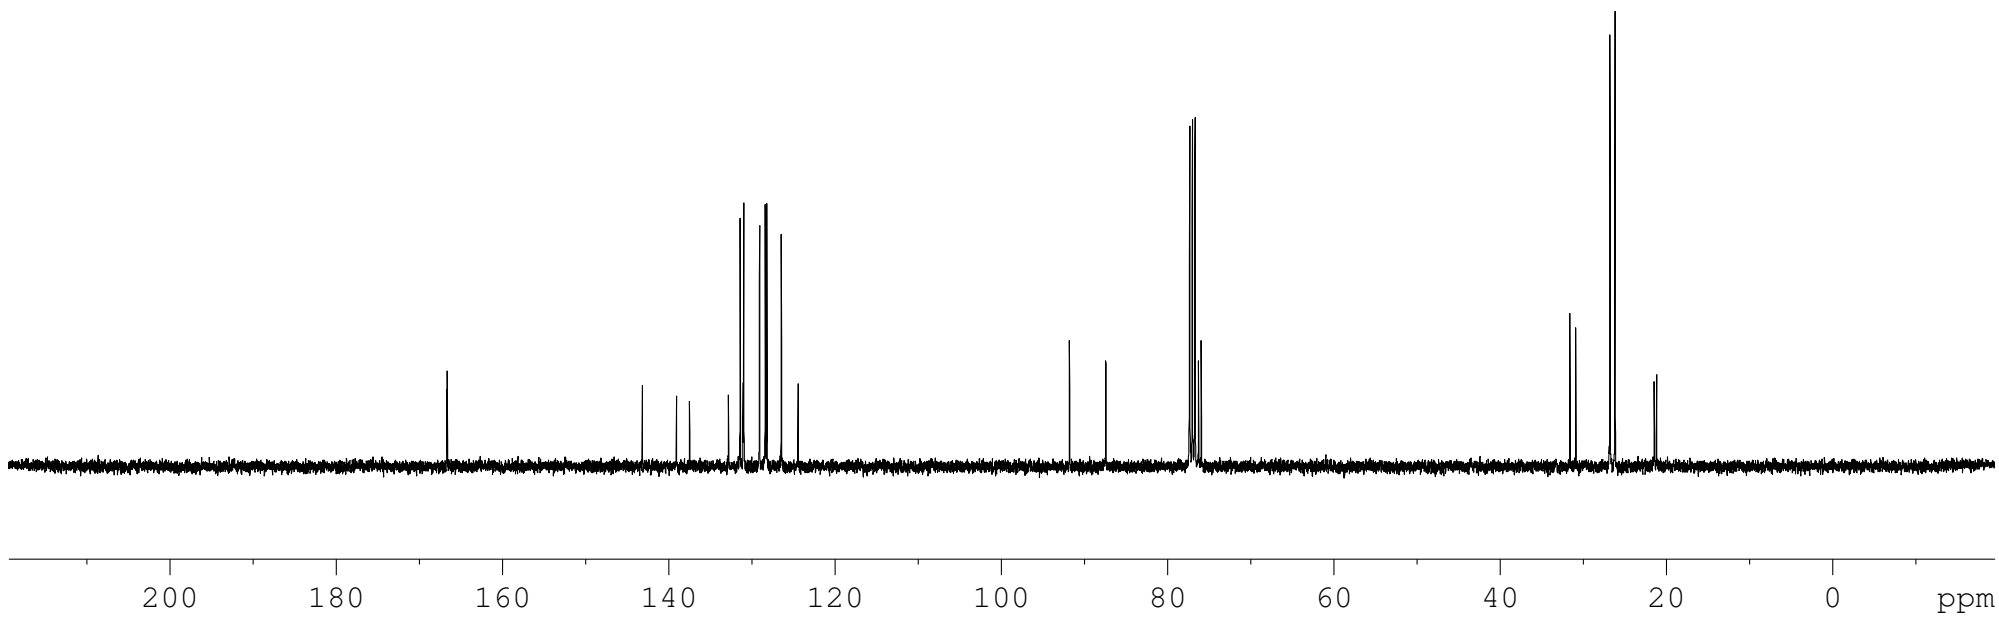



7.532  
7.439  
7.420  
7.374  
7.354  
7.257  
7.243  
7.222  
7.196  
7.142  
7.122  
7.069  
7.049  
7.029  
6.970  
6.950  
6.081  
5.729

4.227  
4.201  
4.096  
4.070  
3.930  
3.904

2.967  
2.942

2.336  
2.318

1.157

0.728

0.075  
0.000

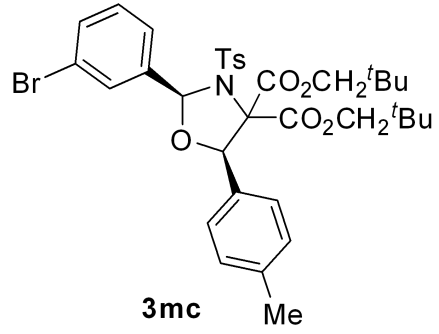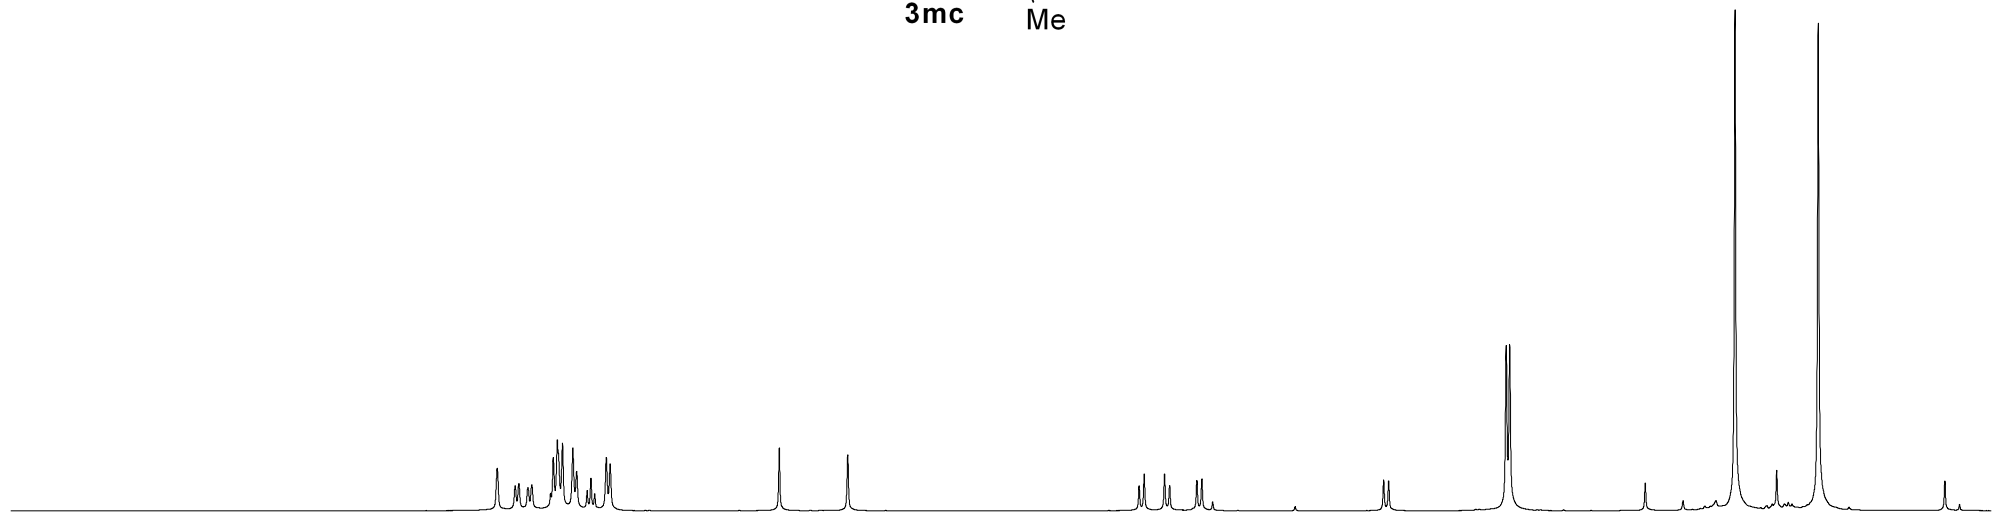

9.5 9.0 8.5 8.0 7.5 7.0 6.5 6.0 5.5 5.0 4.5 4.0 3.5 3.0 2.5 2.0 1.5 1.0 0.5 ppm

1.03  
1.10  
1.04  
3.99  
1.95  
1.13  
1.91

1.00  
0.98

1.01  
1.01  
0.98

0.94

2.93  
2.83

8.83

8.94

166.75  
166.47  
143.33  
139.05  
137.25  
135.77  
132.99  
132.76  
131.05  
129.29  
129.07  
128.62  
128.51  
128.10  
126.48  
122.22

91.71  
87.41  
77.32  
77.20  
77.00  
76.68  
76.27  
75.93

31.58  
30.89  
26.76  
26.17  
21.48  
21.15

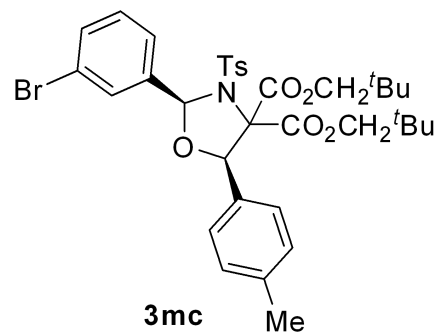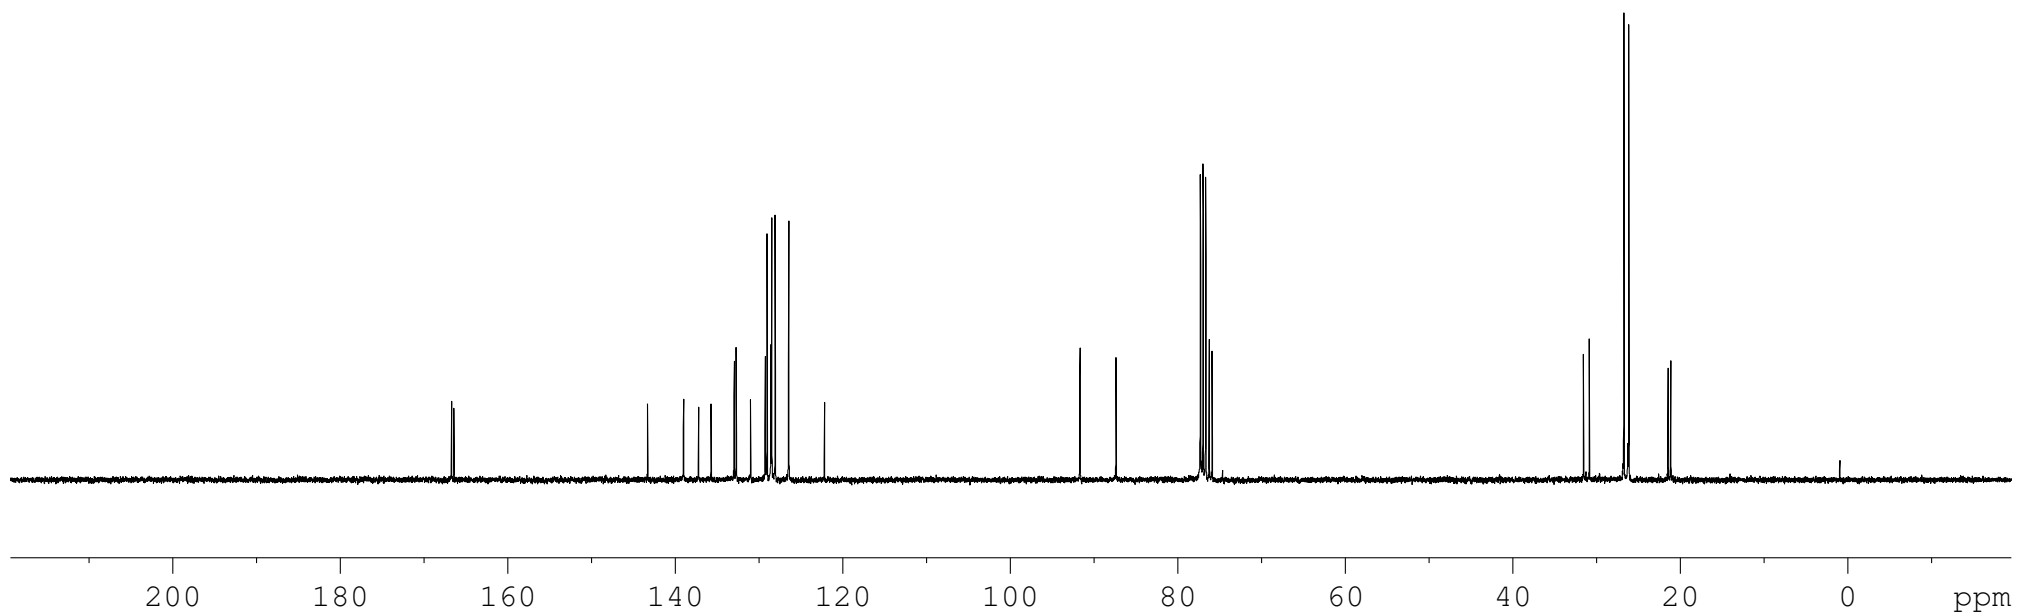

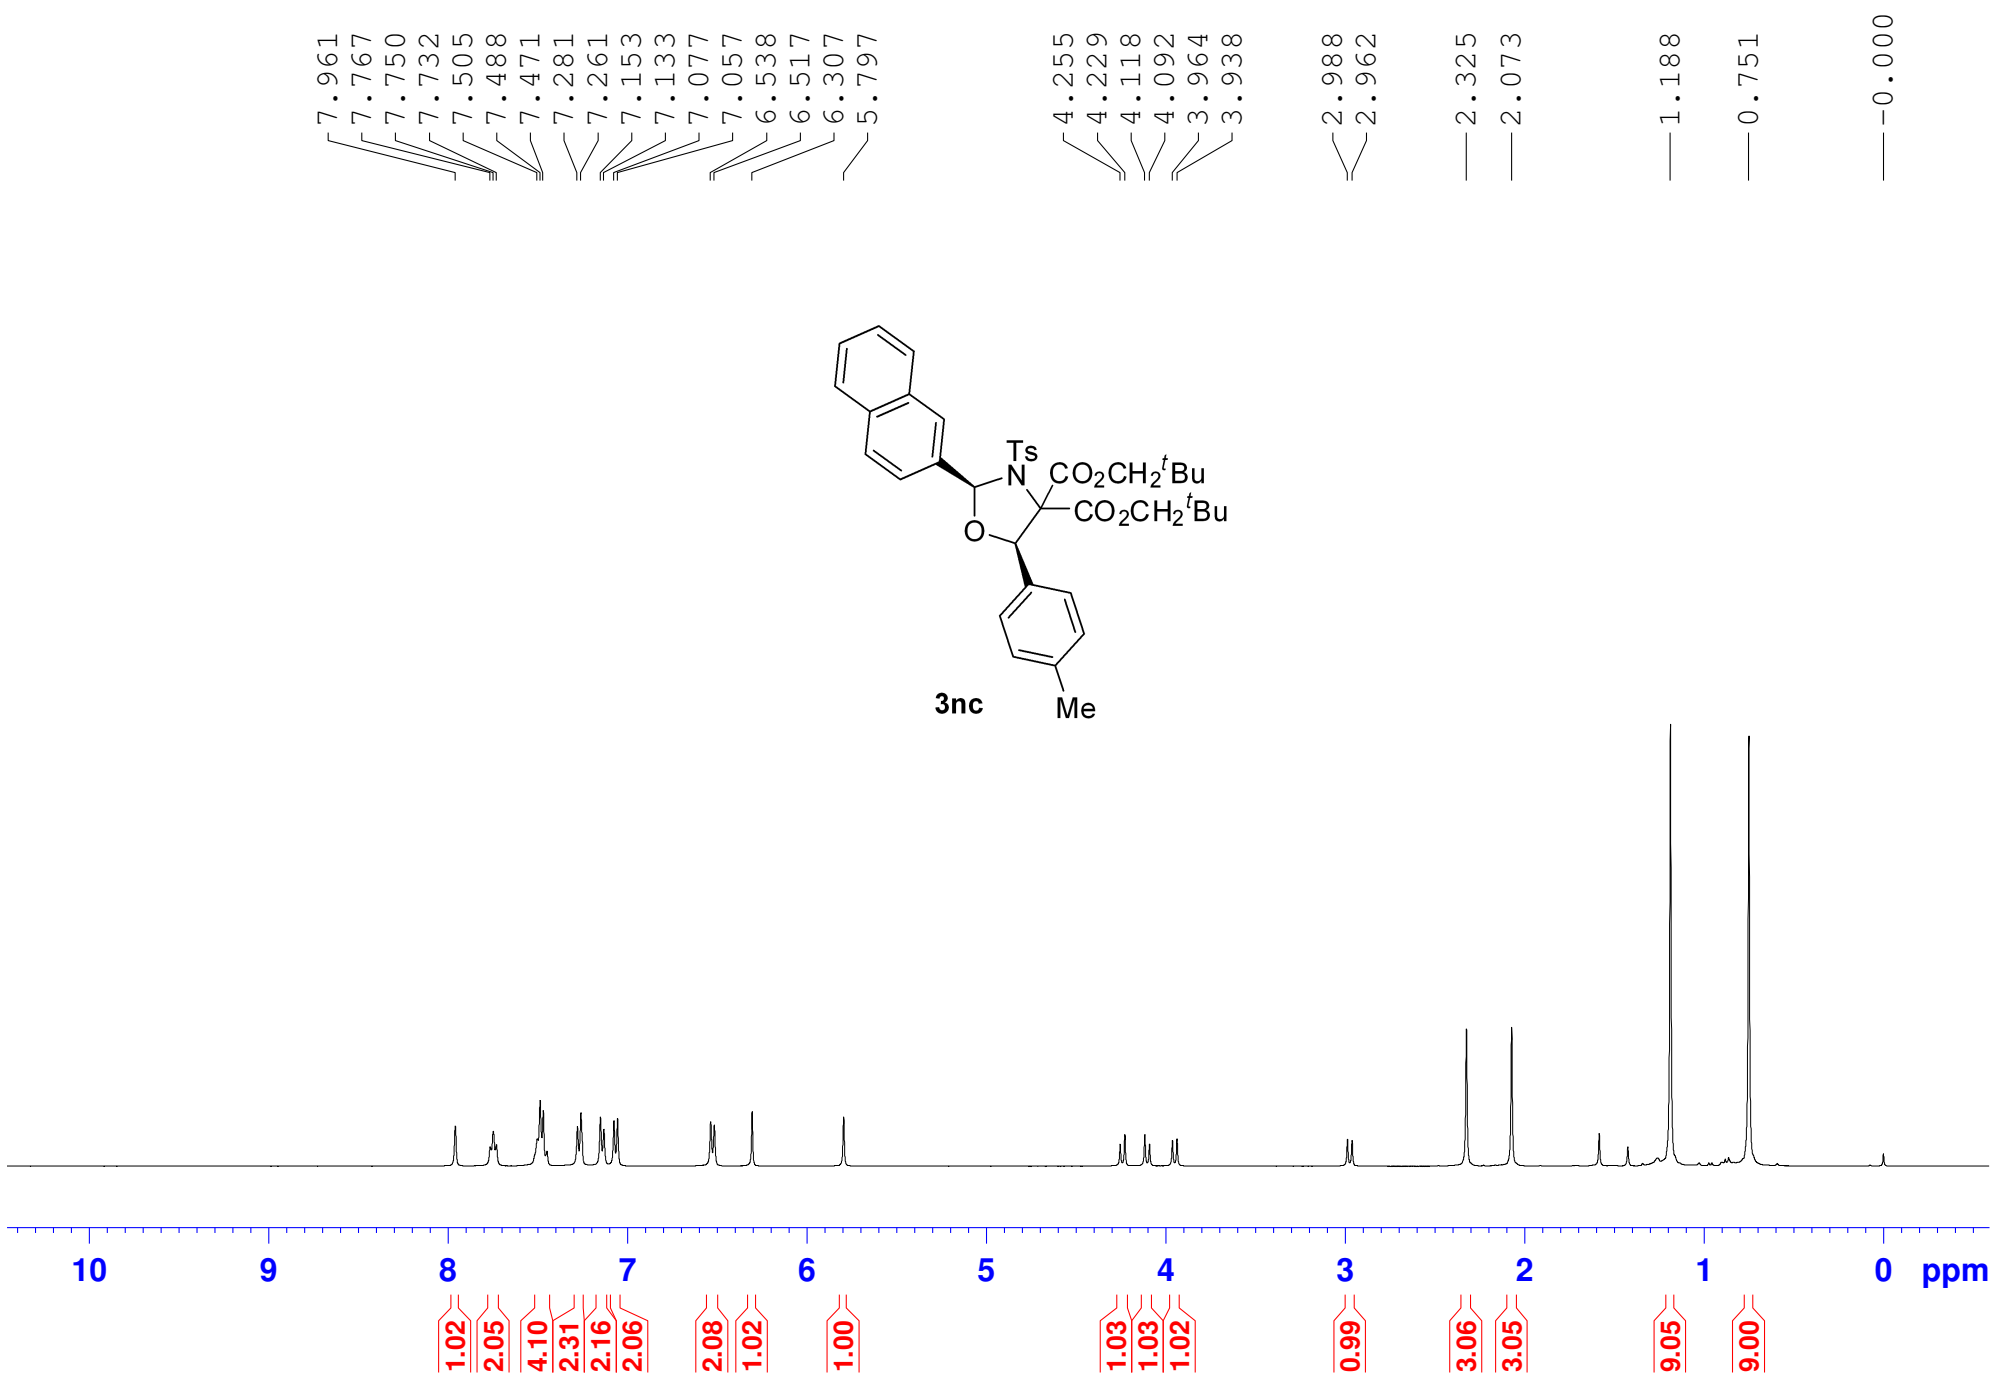

166.95  
166.77  
142.63  
138.97  
137.40  
134.25  
132.40  
131.37  
130.91  
130.21  
129.06  
128.40  
128.19  
127.96  
127.73  
127.35  
126.83  
126.58  
126.02  
125.91  
— 92.72  
— 87.40  
— 77.54  
77.32  
77.00  
76.68  
76.23  
75.92

31.64  
30.93  
26.80  
26.21  
21.18  
21.15

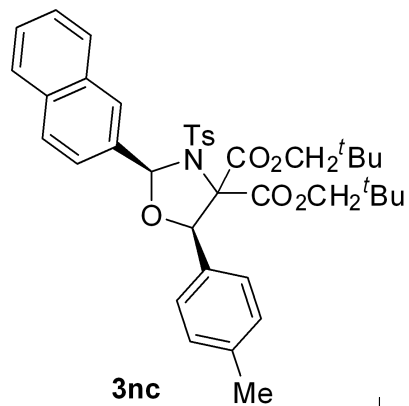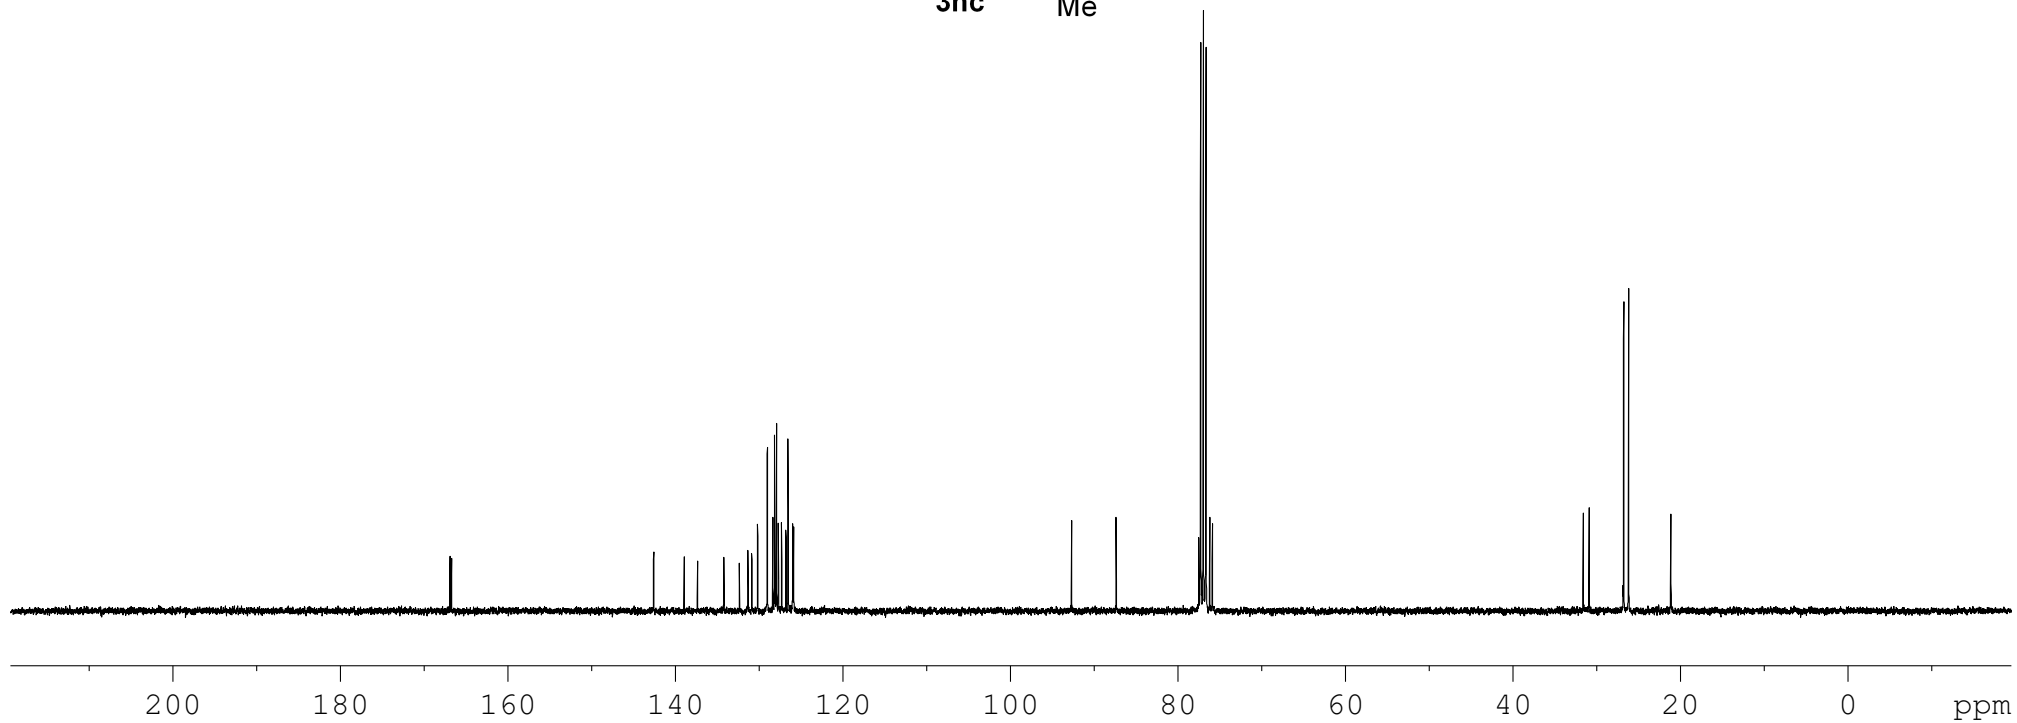

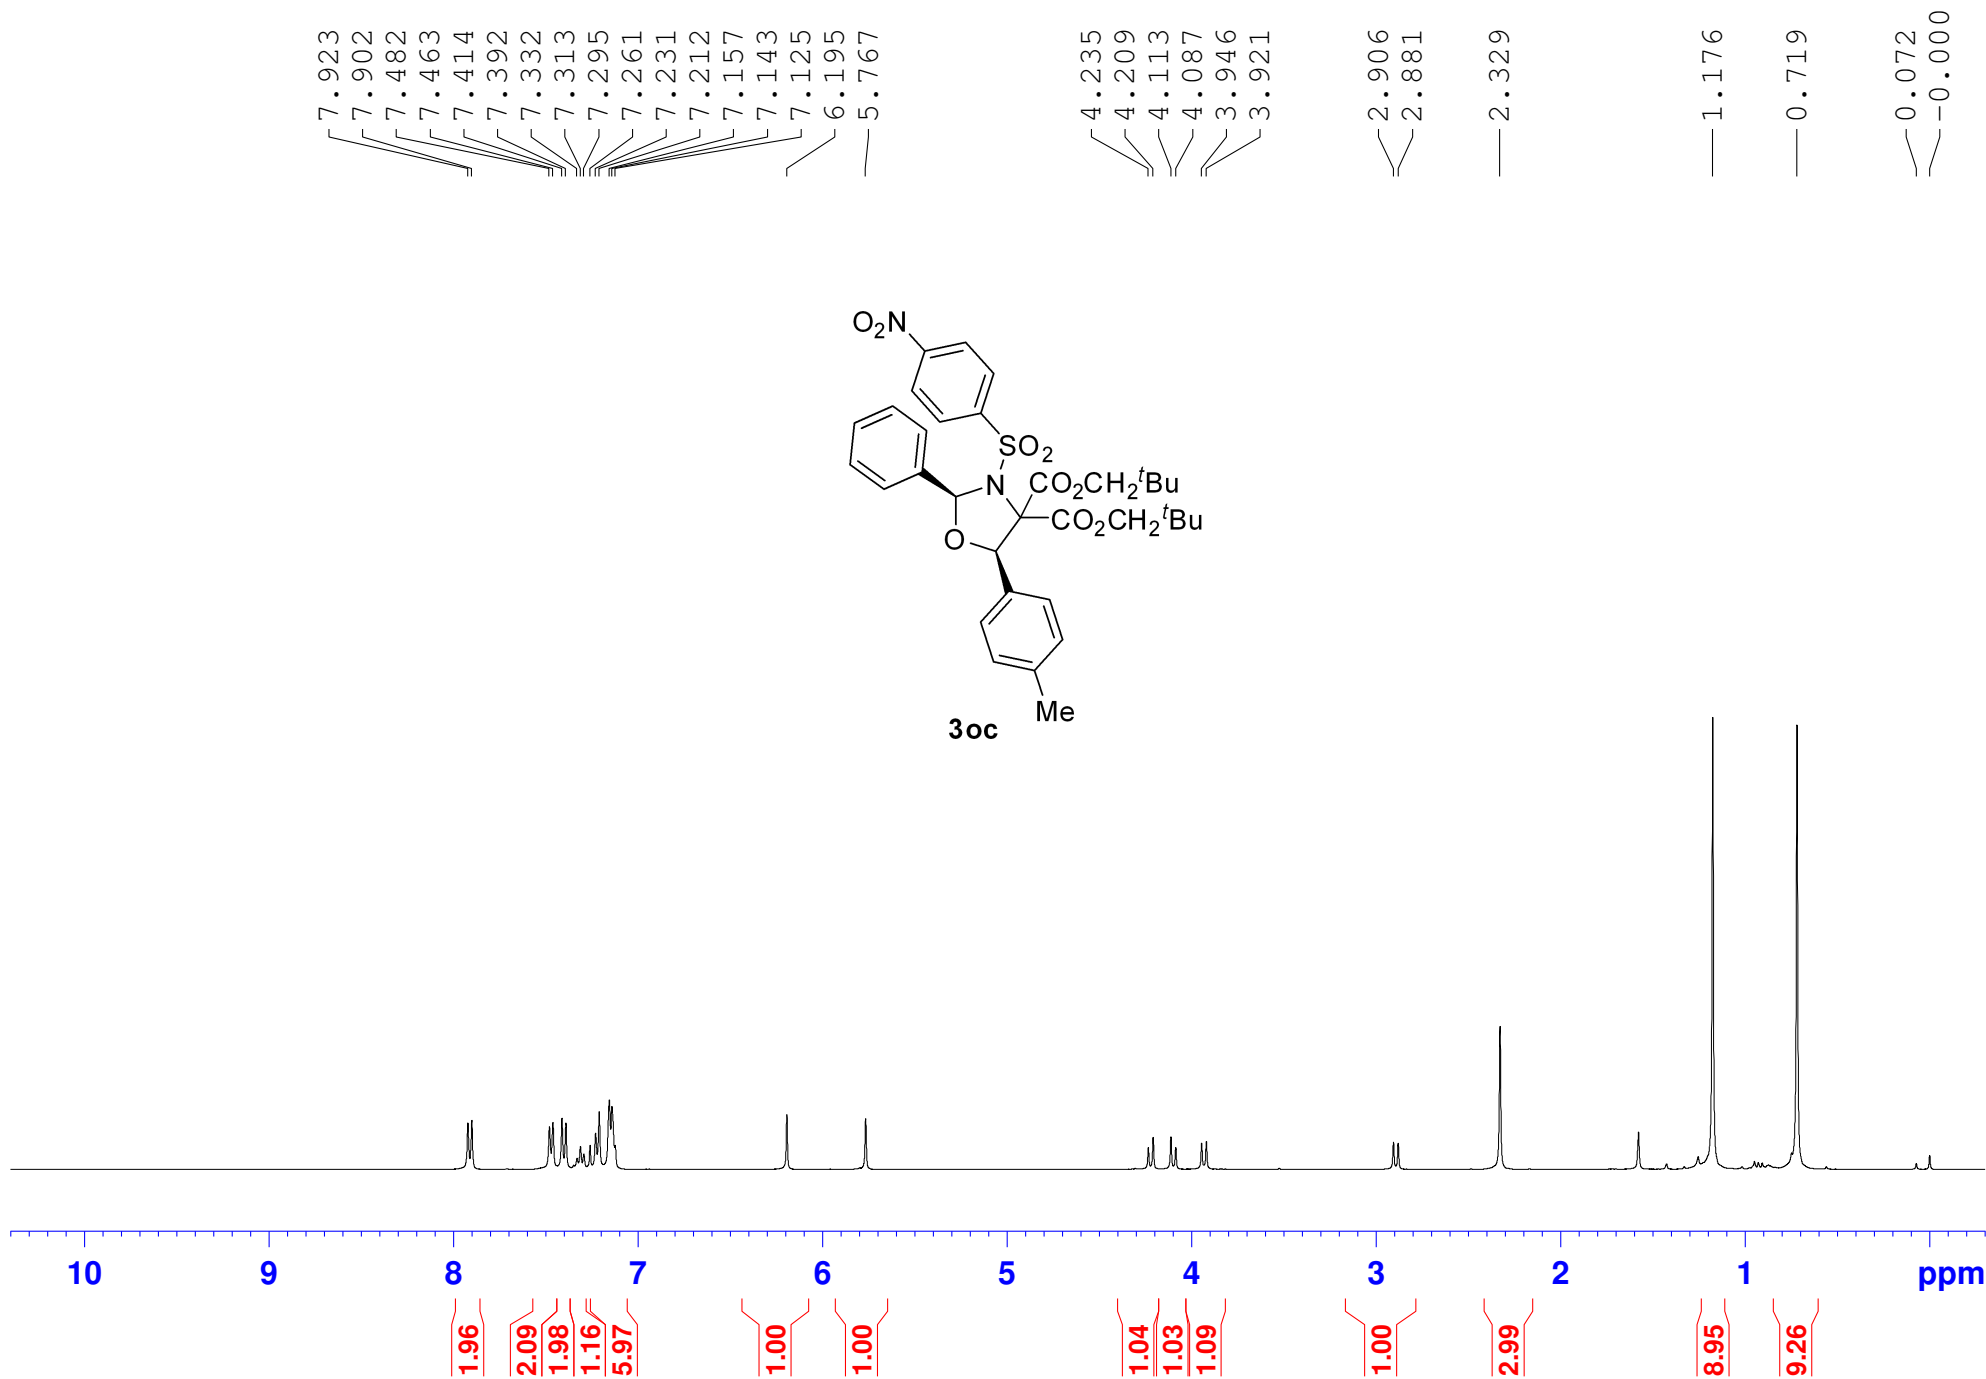

166.62  
166.44

149.24  
145.93  
139.28  
133.15  
130.88  
130.48  
130.05  
129.50  
129.18  
128.10  
126.47  
122.68

92.67  
87.46  
77.74  
77.32  
77.00  
76.68  
76.57  
76.19

31.61  
30.91  
26.76  
26.11  
21.17

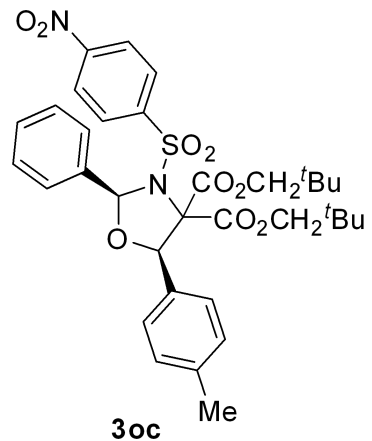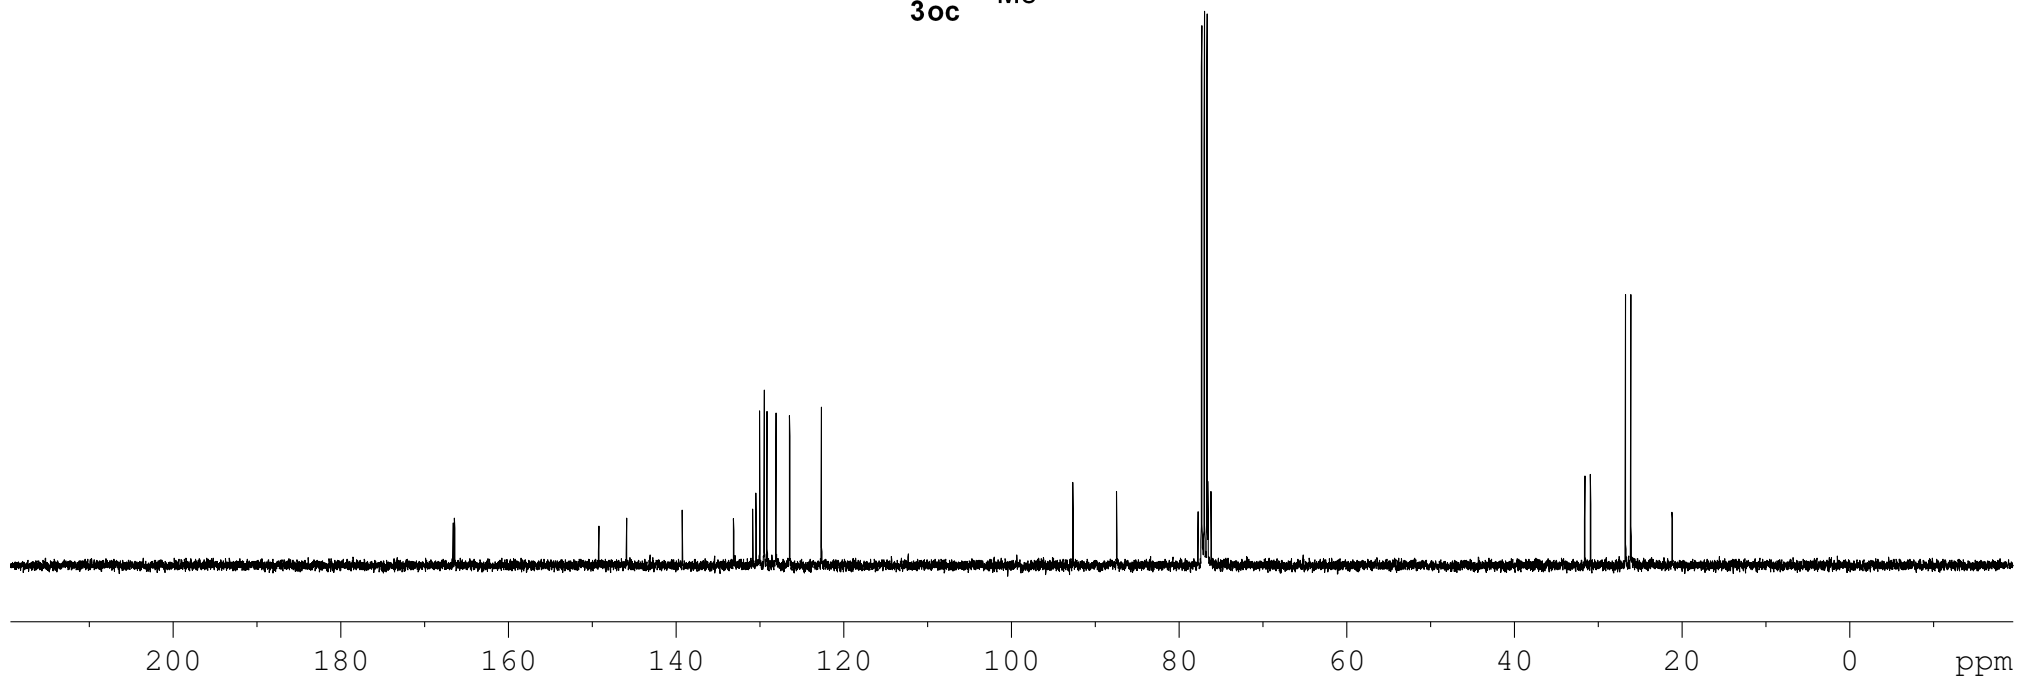

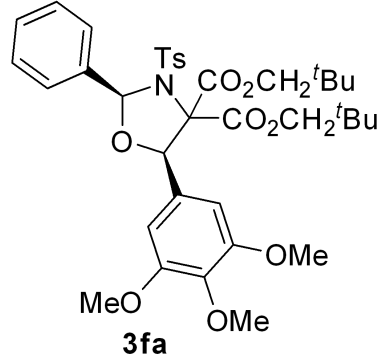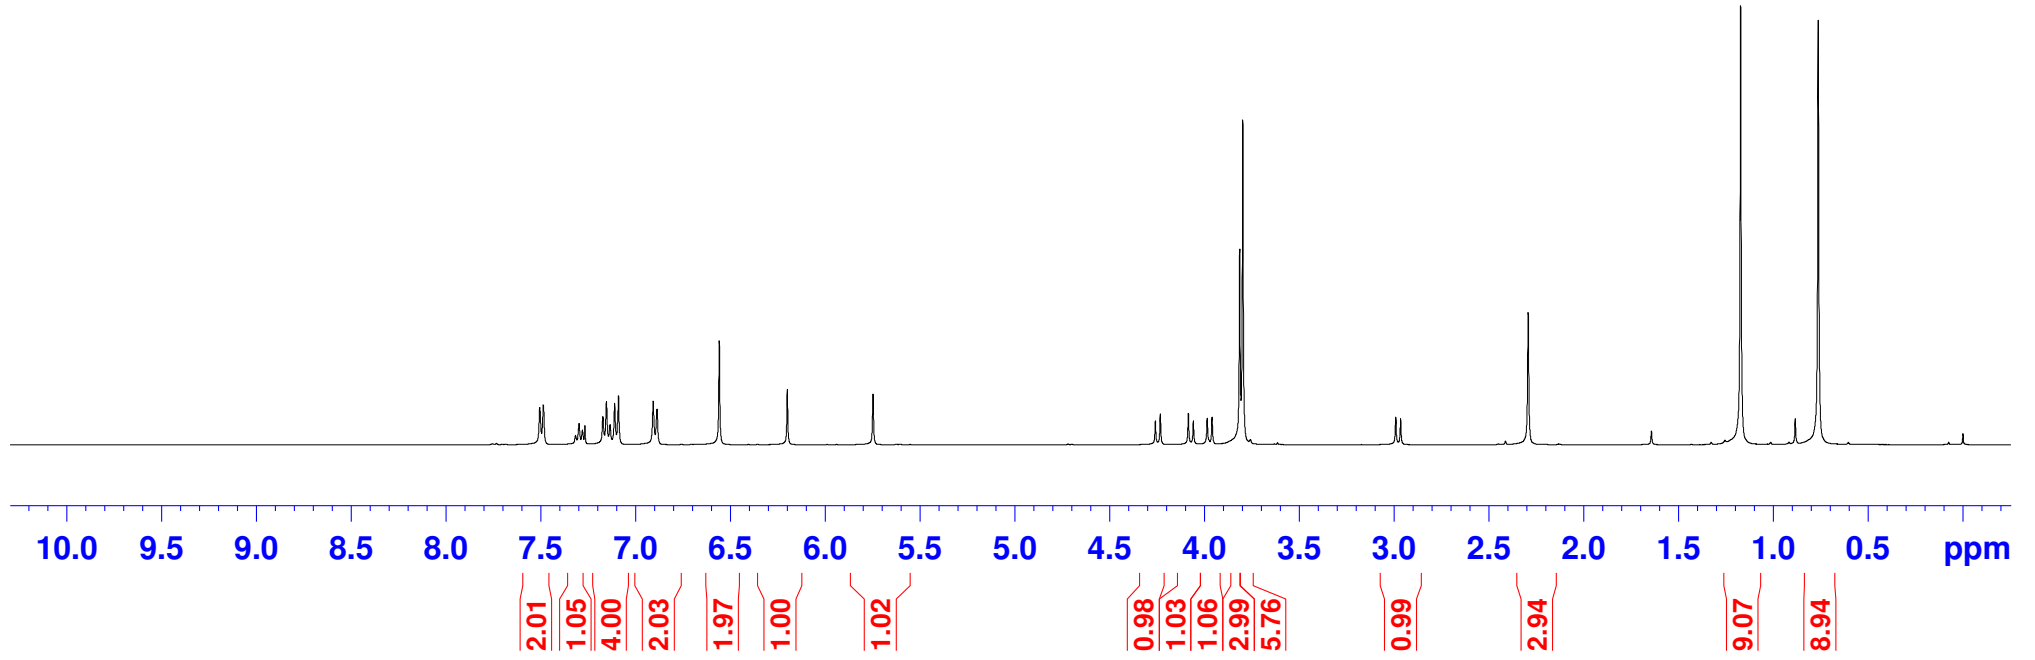

166.79  
 166.48  
 153.22  
 142.76  
 138.31  
 137.49  
 133.77  
 129.90  
 129.81  
 128.27  
 128.08  
 127.91  
 103.44  
 92.77  
 87.09  
 77.31  
 77.22  
 77.00  
 76.68  
 76.31  
 76.00  
 60.68  
 56.00  
 31.58  
 31.00  
 26.73  
 26.15  
 21.39

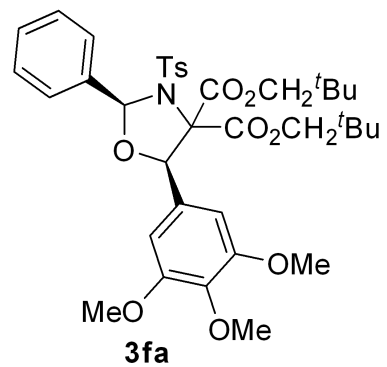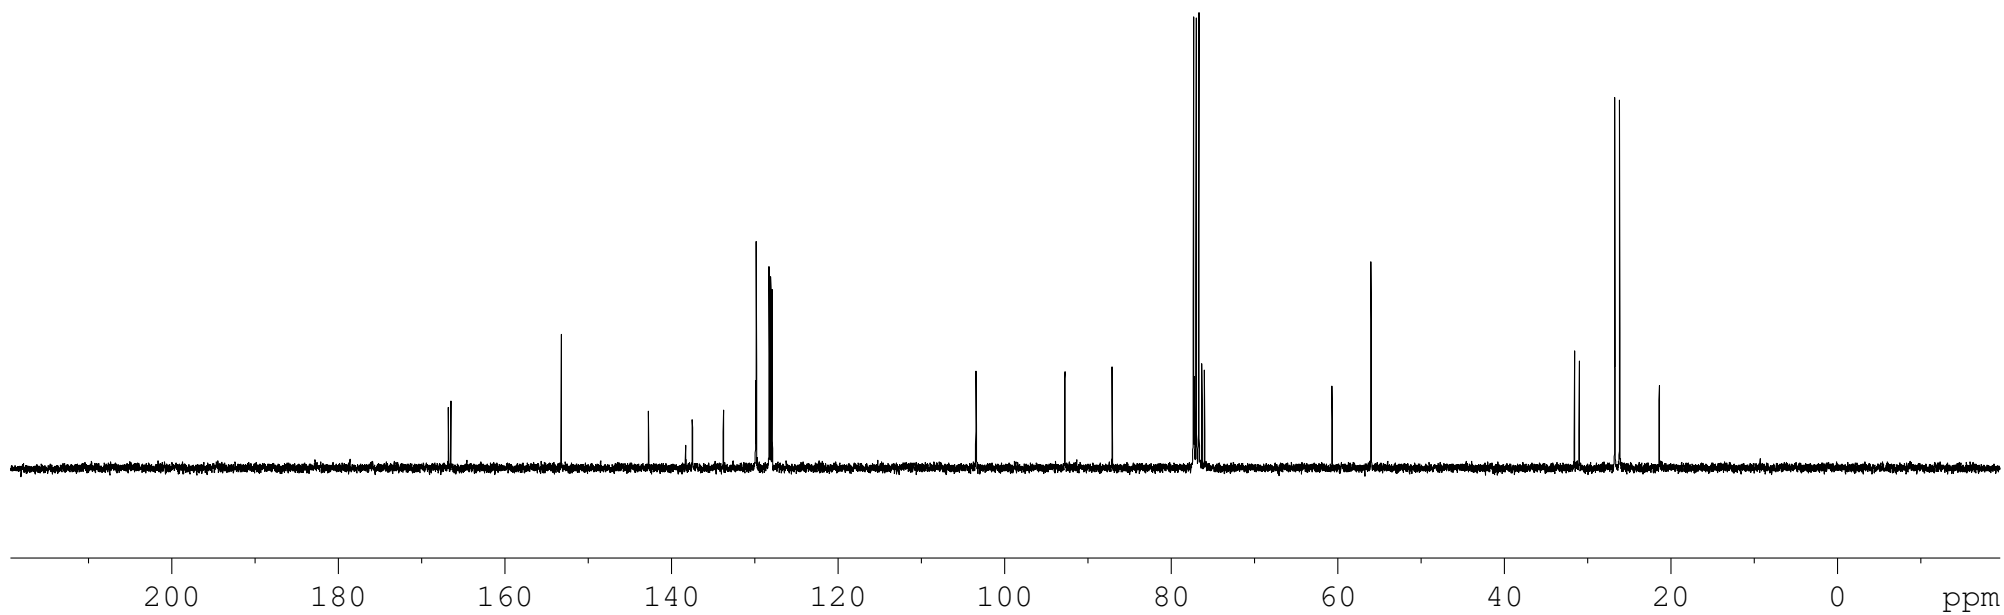



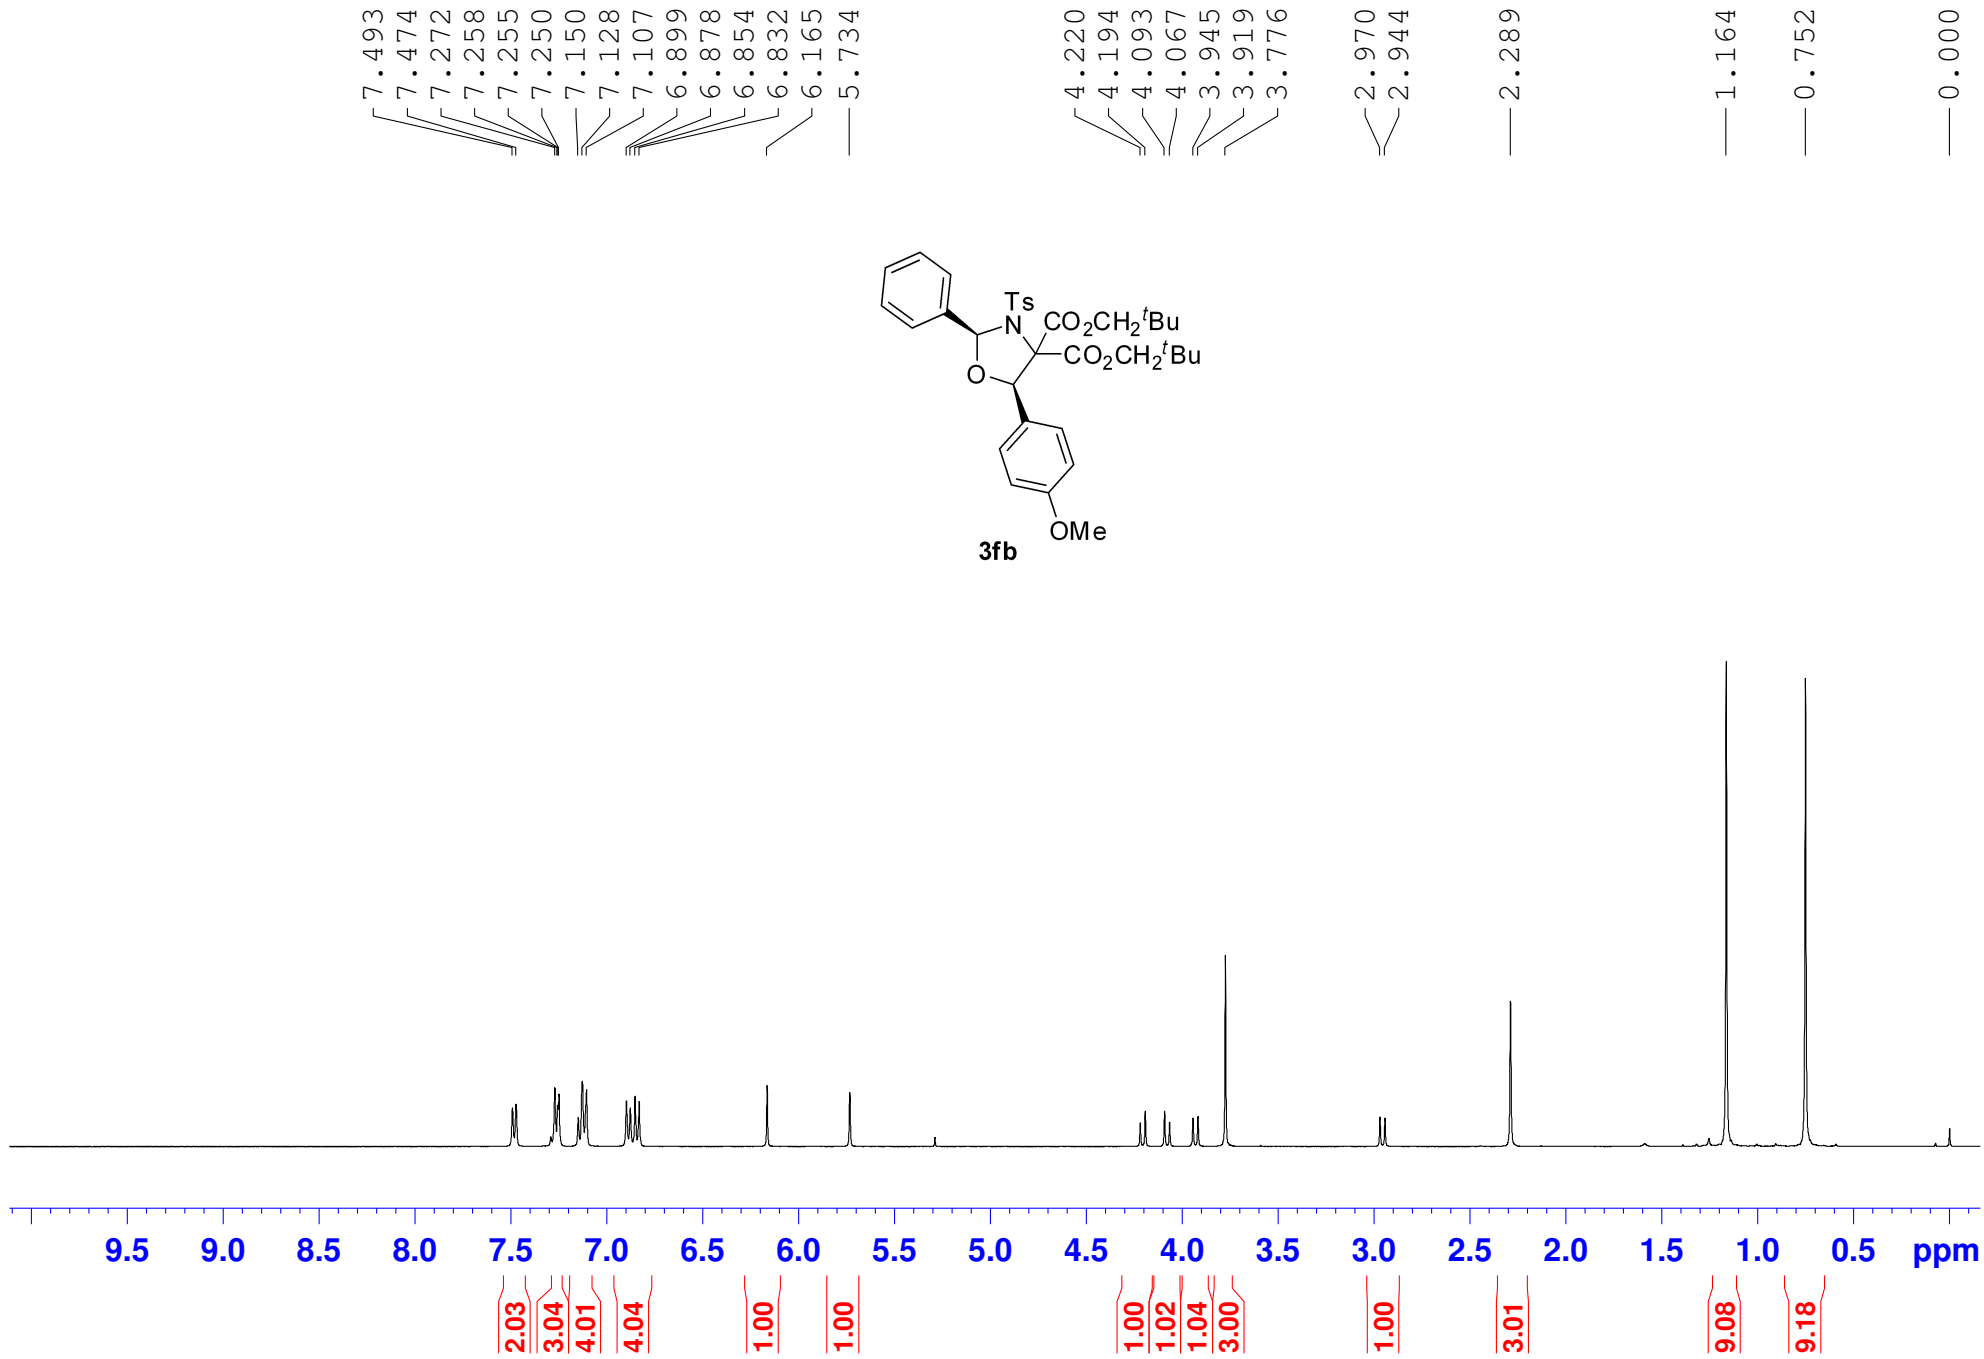

166.94  
 166.63  
 160.16  
 142.67  
 137.58  
 133.66  
 129.86  
 129.82  
 128.26  
 128.13  
 127.95  
 127.86  
 126.33  
 113.76  
 92.60  
 87.16  
 77.36  
 77.32  
 77.00  
 76.68  
 76.18  
 75.86  
 55.26  
 31.57  
 30.97  
 26.75  
 26.19  
 21.39

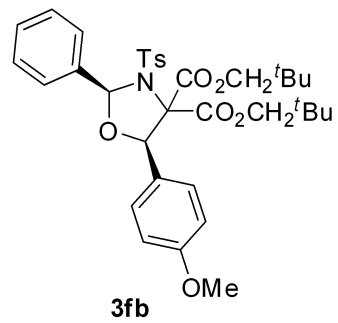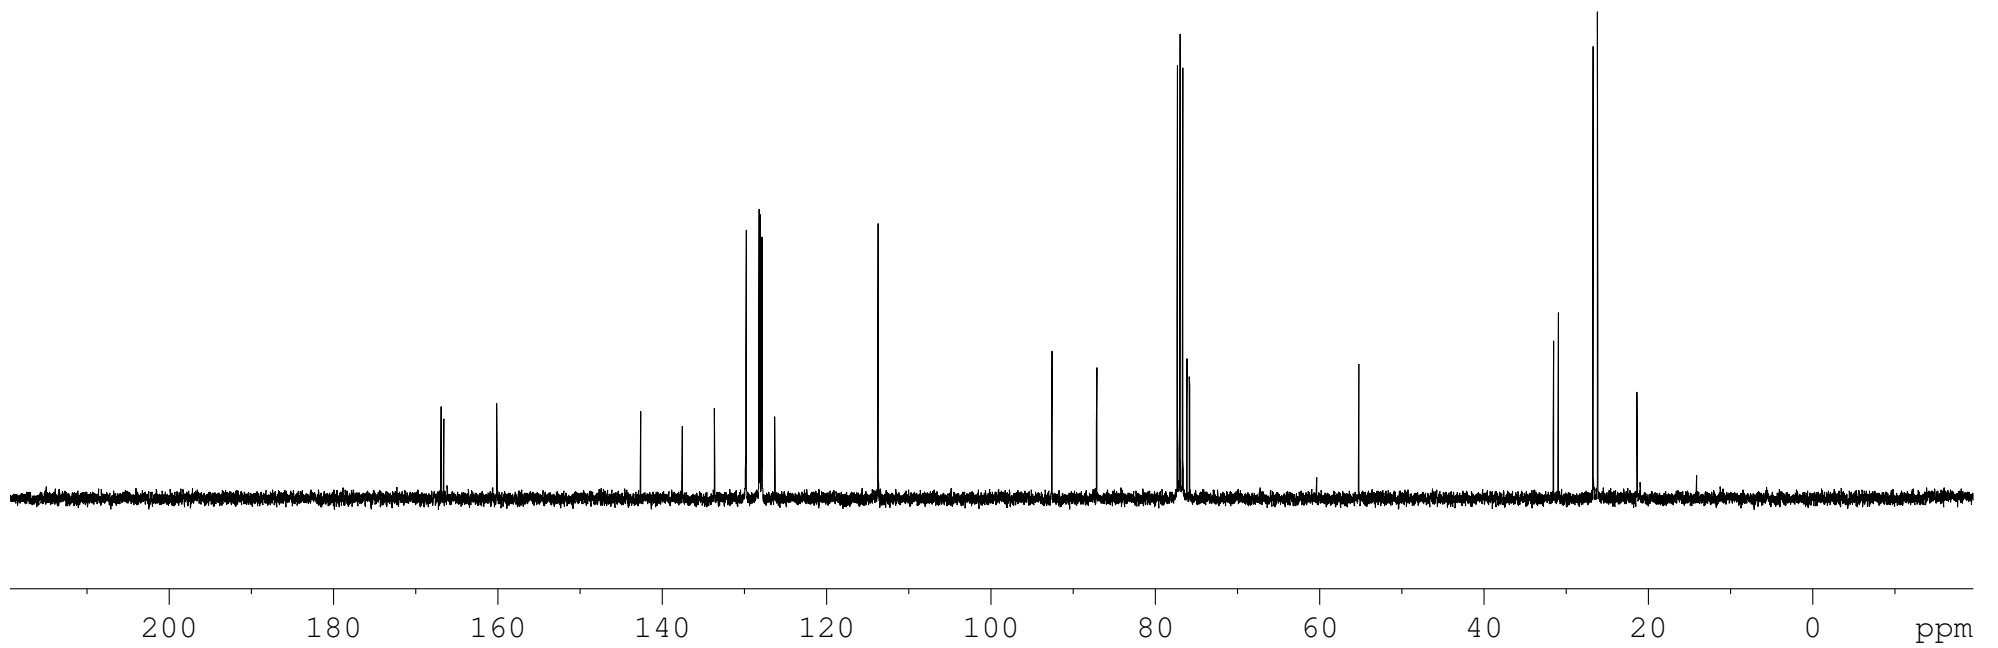

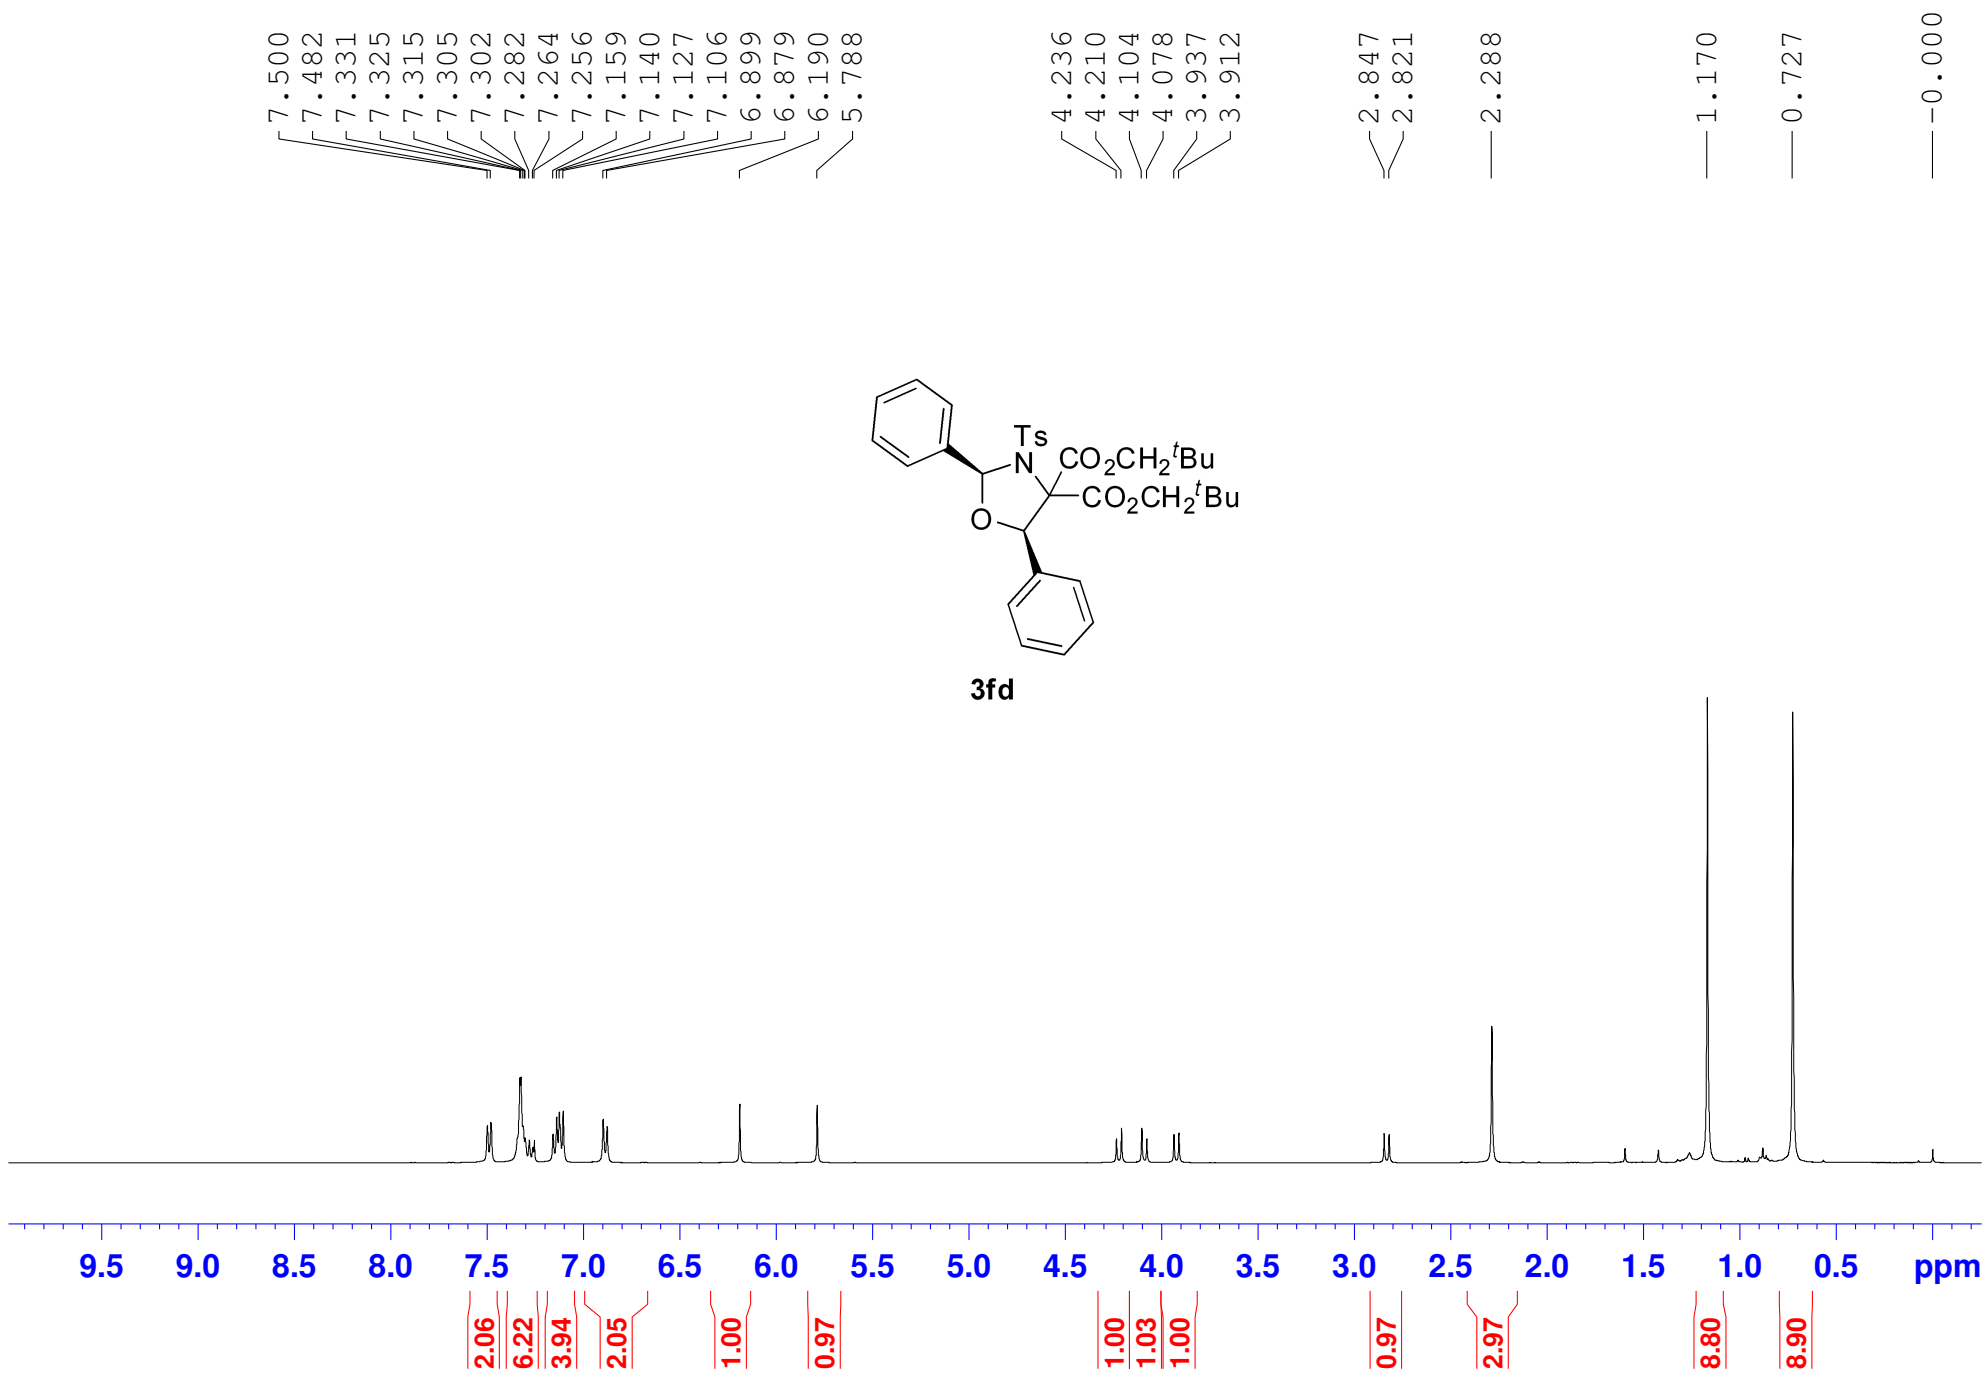

166.88  
166.49

142.71  
137.56  
134.38  
133.66  
129.90  
129.84  
129.08  
128.37  
128.27  
128.16  
127.89  
126.60

92.75  
87.22  
77.41  
77.32  
77.00  
76.69  
76.28  
75.77

31.57  
30.97  
26.77  
26.19  
21.41

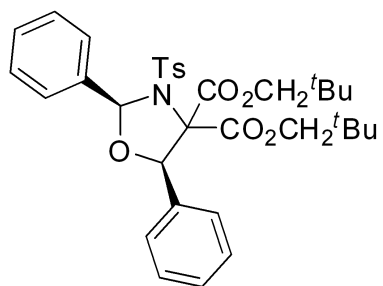

3fd

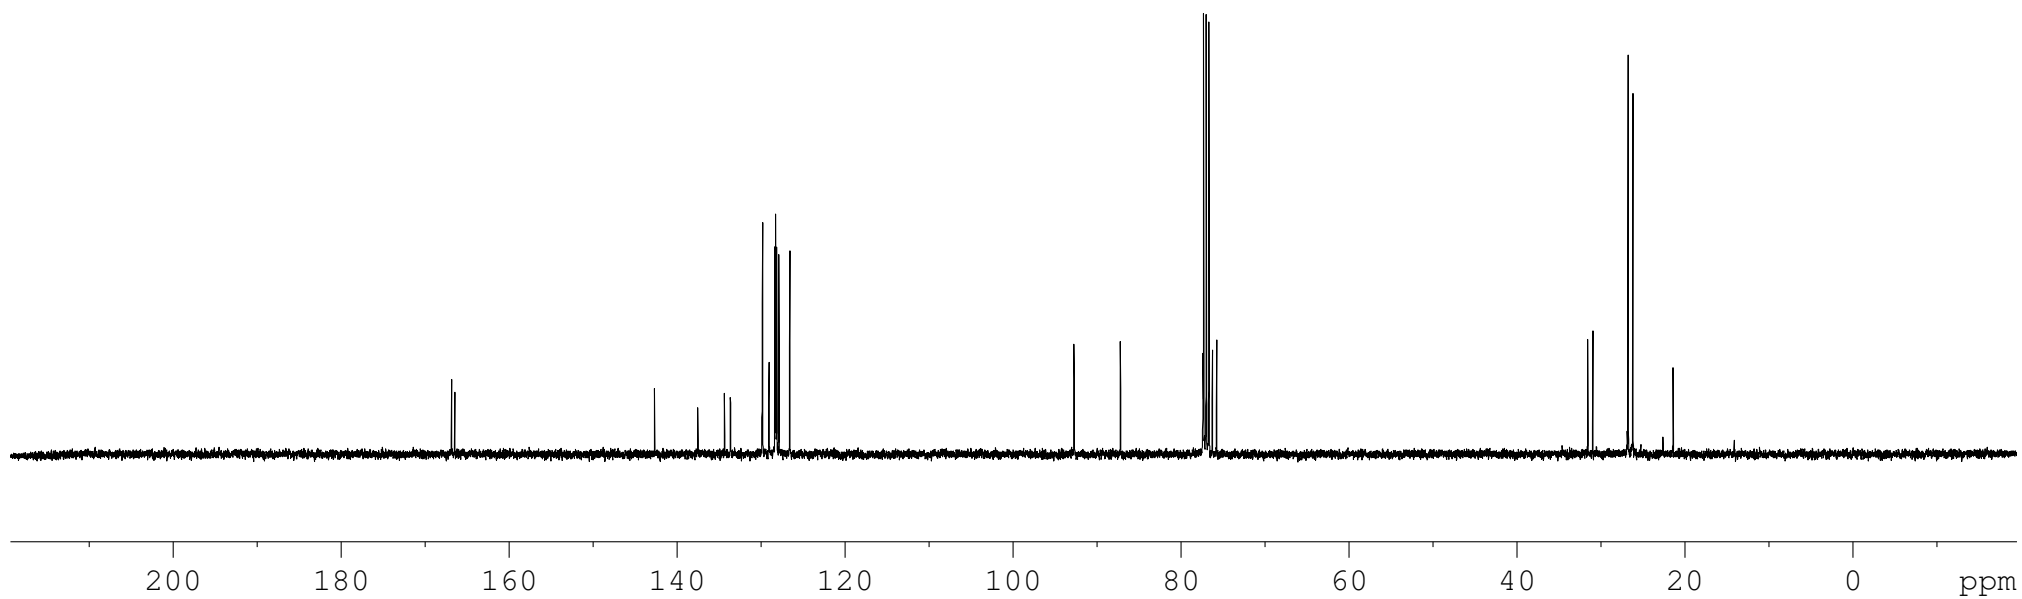

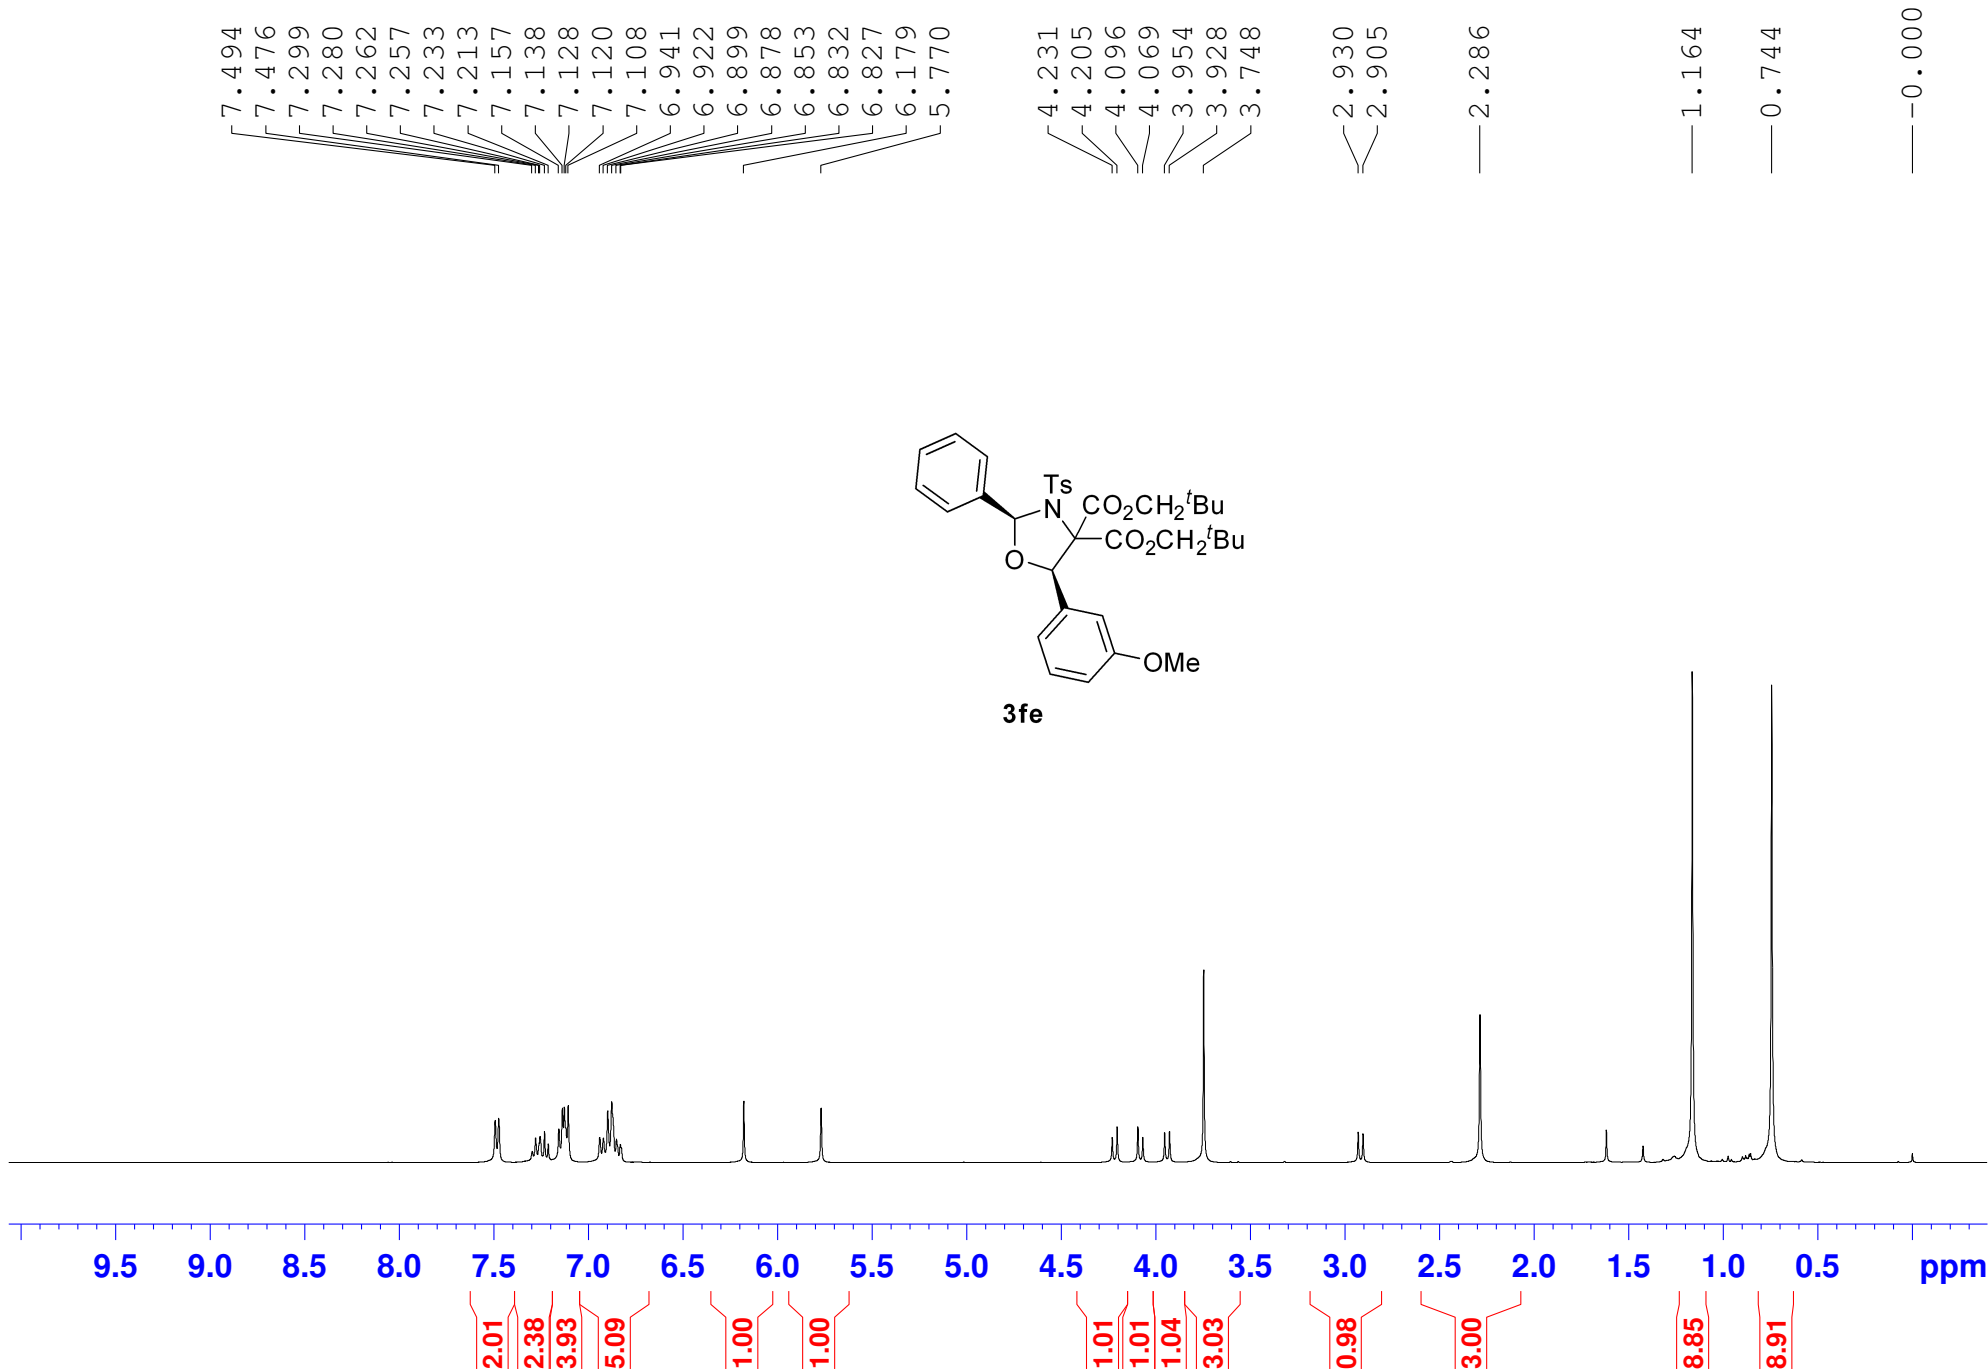

166.84  
 166.45  
 159.60  
 142.71  
 137.58  
 135.85  
 133.73  
 129.86  
 129.43  
 128.27  
 128.16  
 127.88  
 118.84  
 114.60  
 112.15  
 92.77  
 87.04  
 77.36  
 77.32  
 77.00  
 76.68  
 76.31  
 75.88  
 55.16  
 31.56  
 30.98  
 26.76  
 26.20  
 21.39

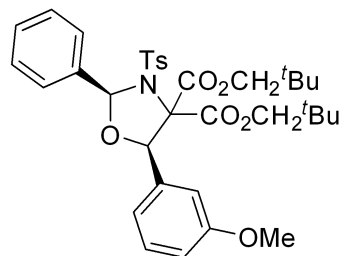

**3fe**

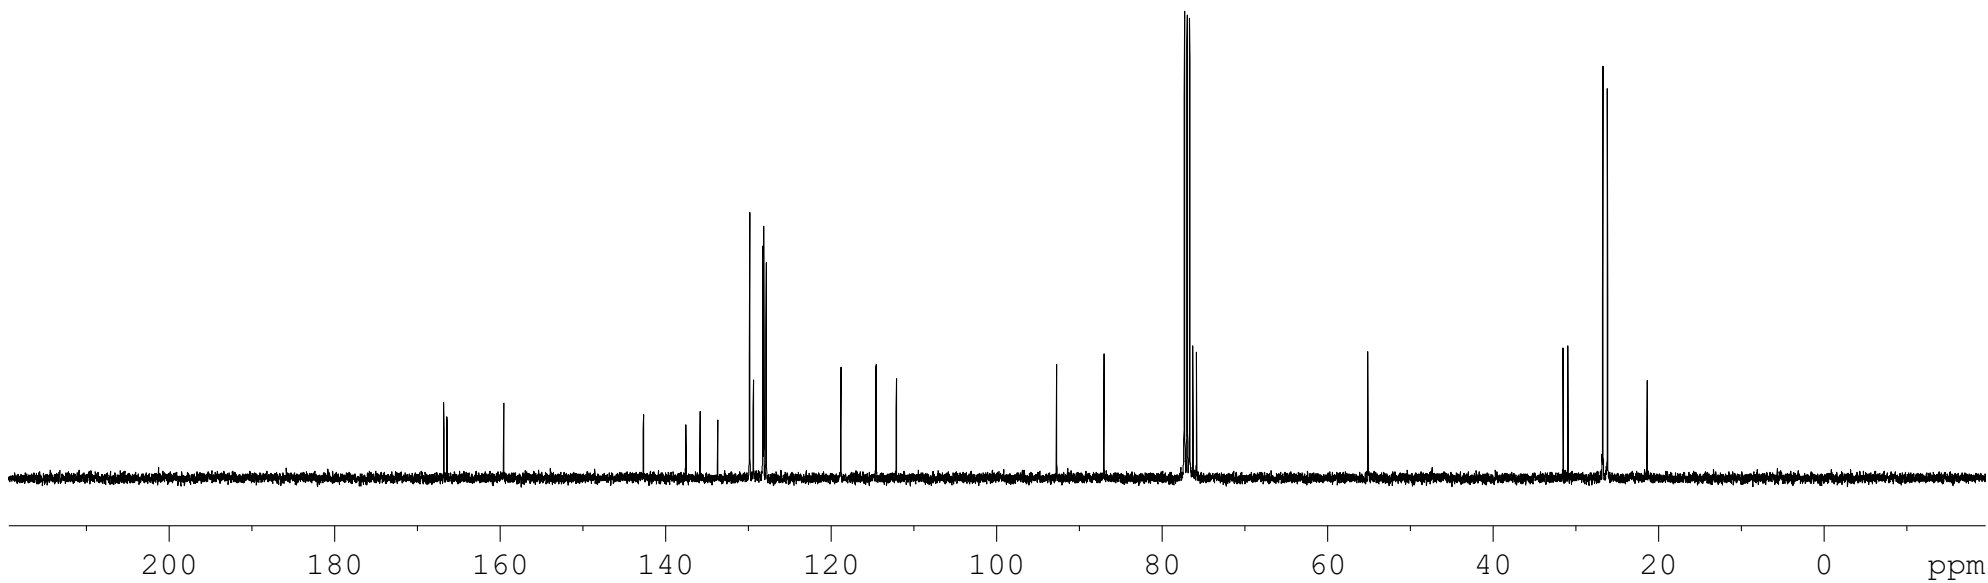

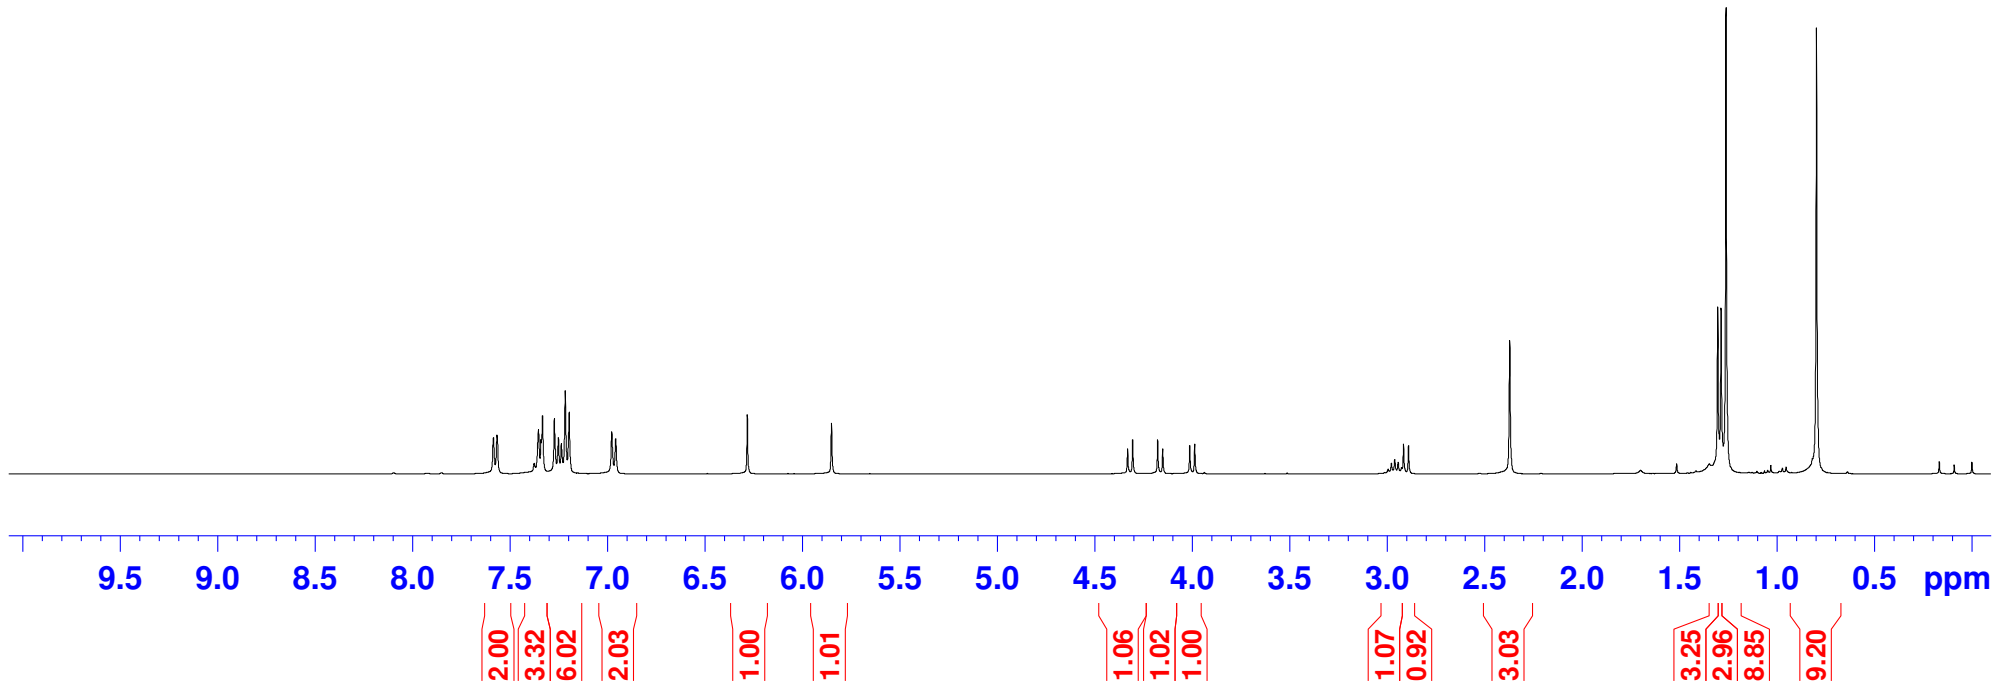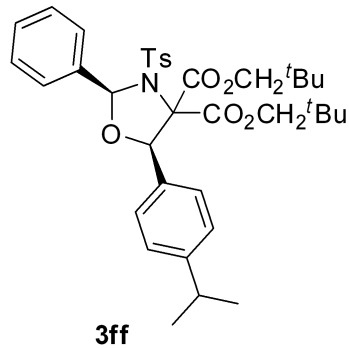

7.586  
7.569  
7.566  
7.378  
7.355  
7.343  
7.335  
7.274  
7.253  
7.238  
7.218  
7.197  
6.979  
6.959  
6.284  
5.852

4.332  
4.306  
4.178  
4.152  
4.013  
3.988

2.979  
2.961  
2.944  
2.917  
2.891  
2.372

1.304  
1.287  
1.262  
0.798

0.000

166.86  
166.63

149.77  
142.62  
137.64  
133.76  
131.75  
129.85  
129.81  
128.21  
128.16  
127.84  
126.67  
126.44

92.73  
87.32  
77.42  
77.32  
77.00  
76.68  
76.20  
75.75

33.87  
31.56  
30.87  
26.77  
26.21  
23.91  
23.82  
21.38

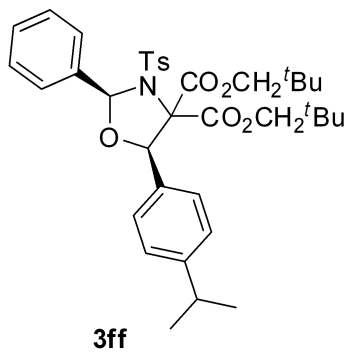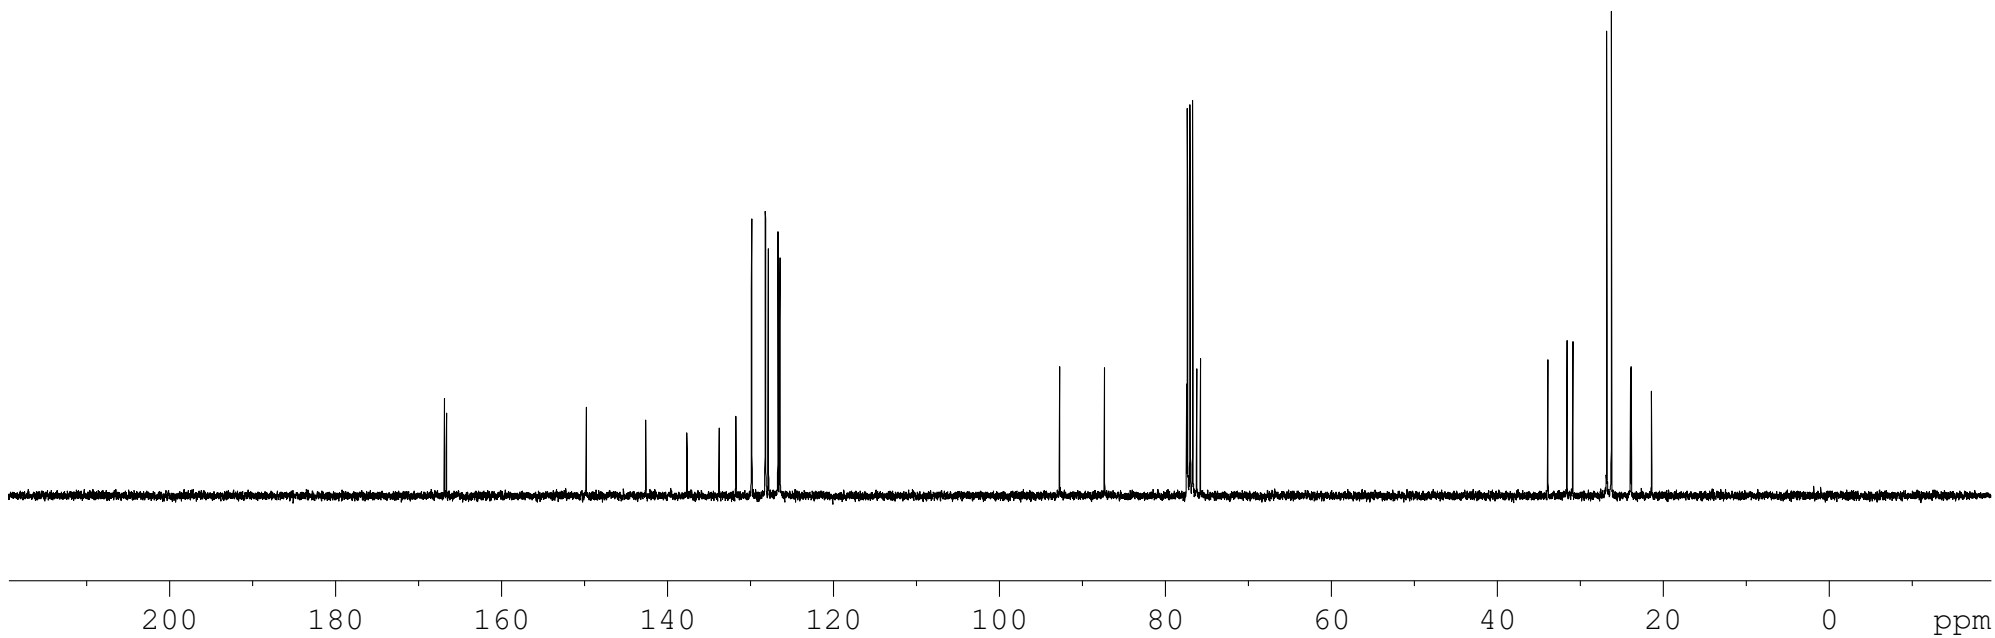



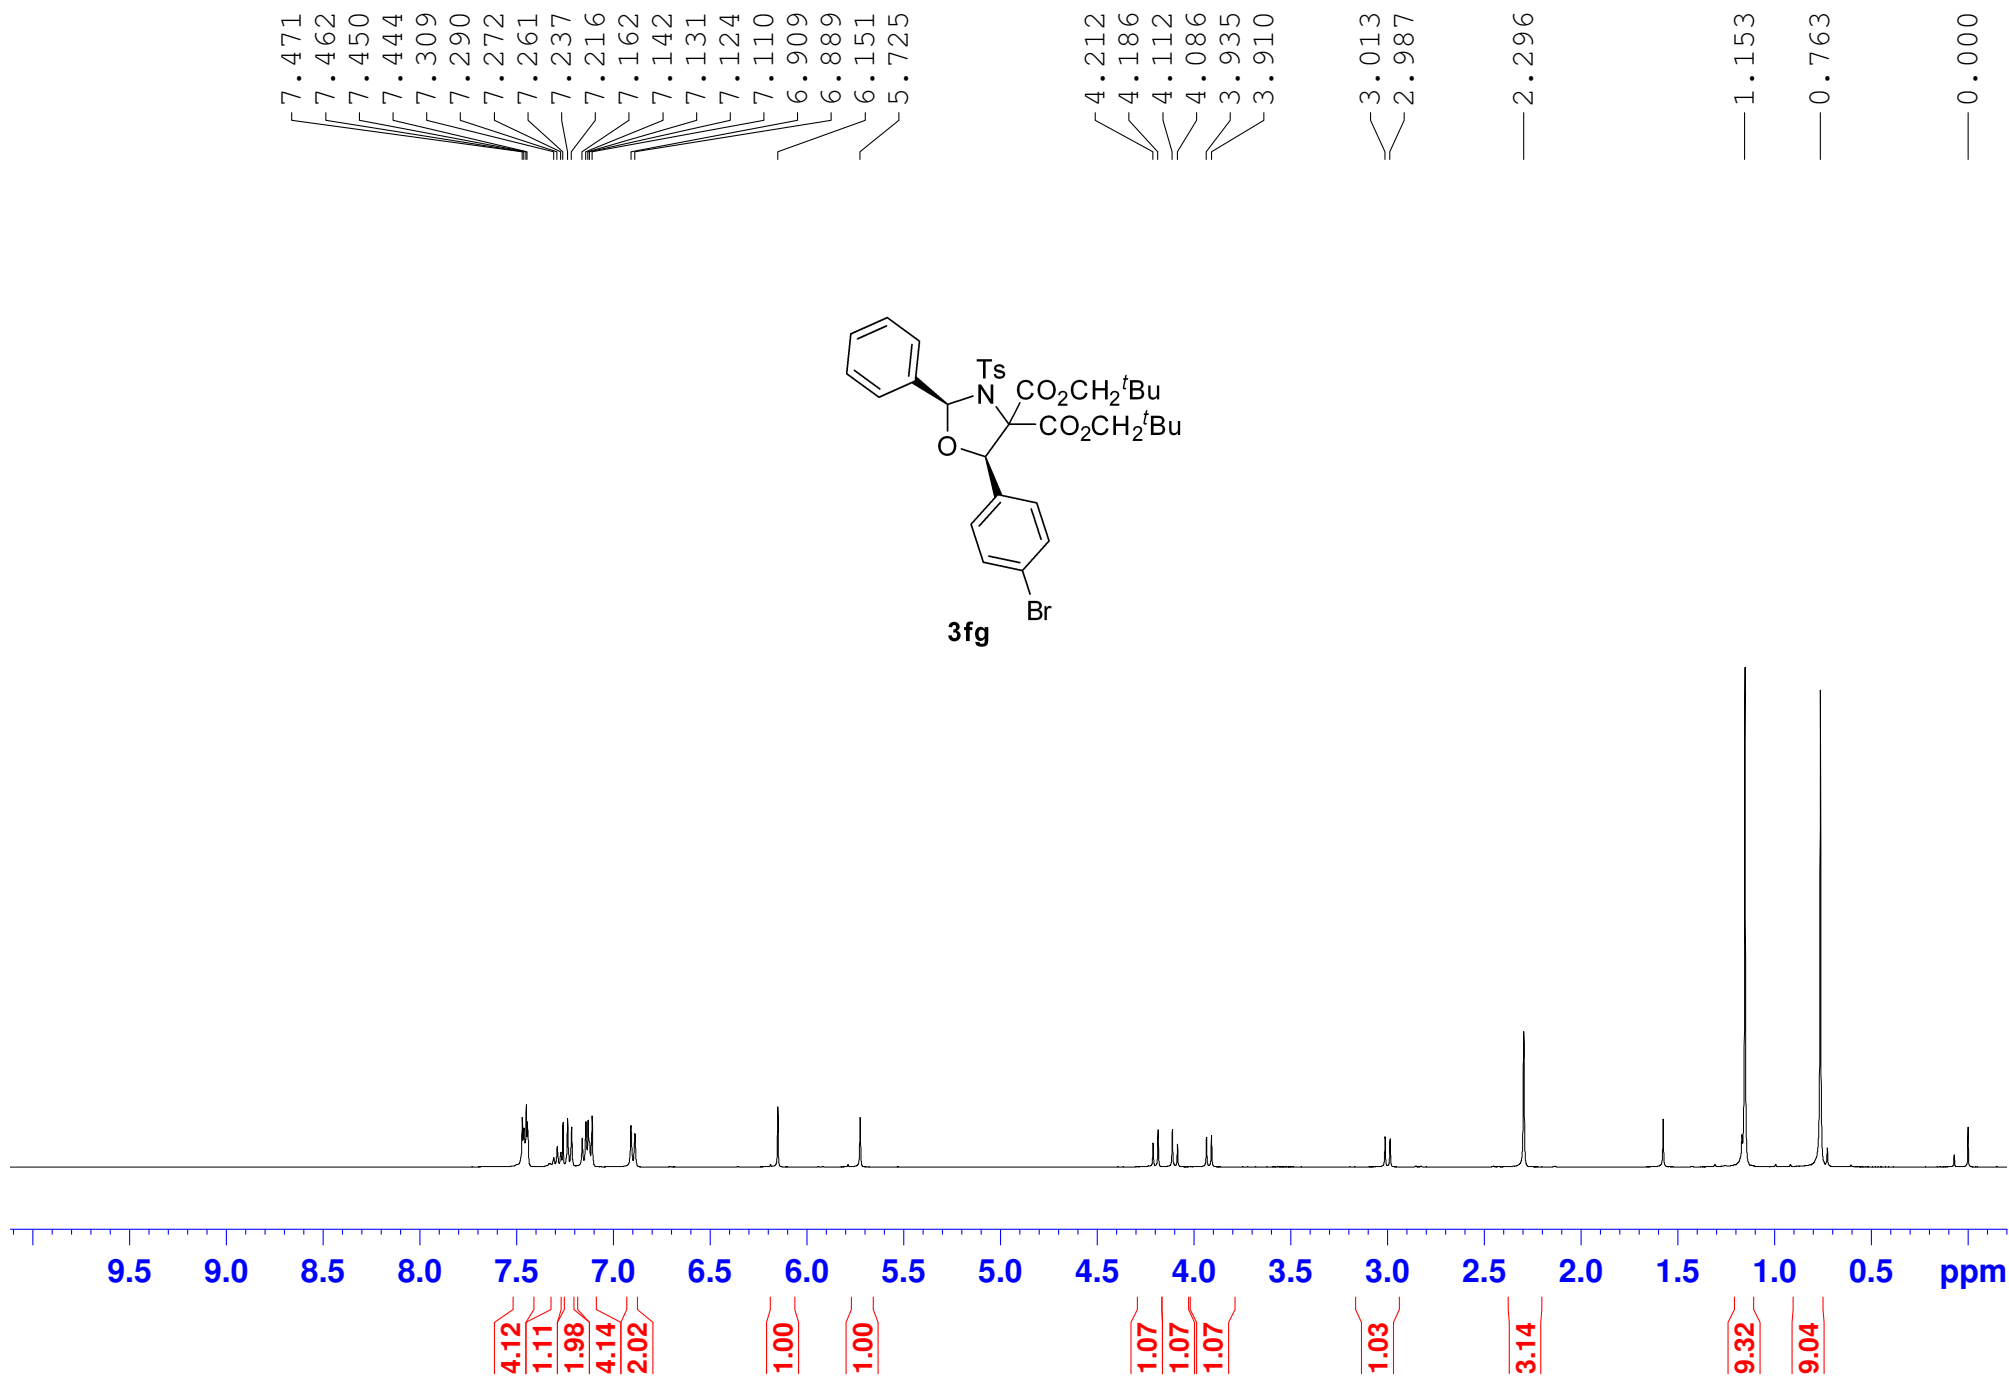

166.89  
166.41

142.85  
137.50  
133.51  
133.47  
131.53  
130.02  
129.79  
128.35  
128.26  
128.18  
127.95  
123.22

92.79  
86.46  
77.32  
77.27  
77.00  
76.68  
76.48  
76.03

31.59  
31.00  
26.75  
26.17  
21.42

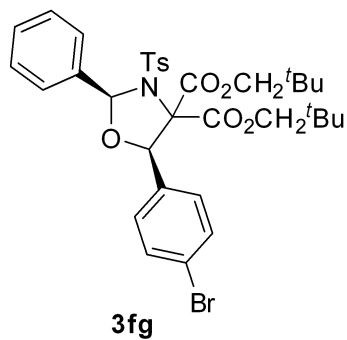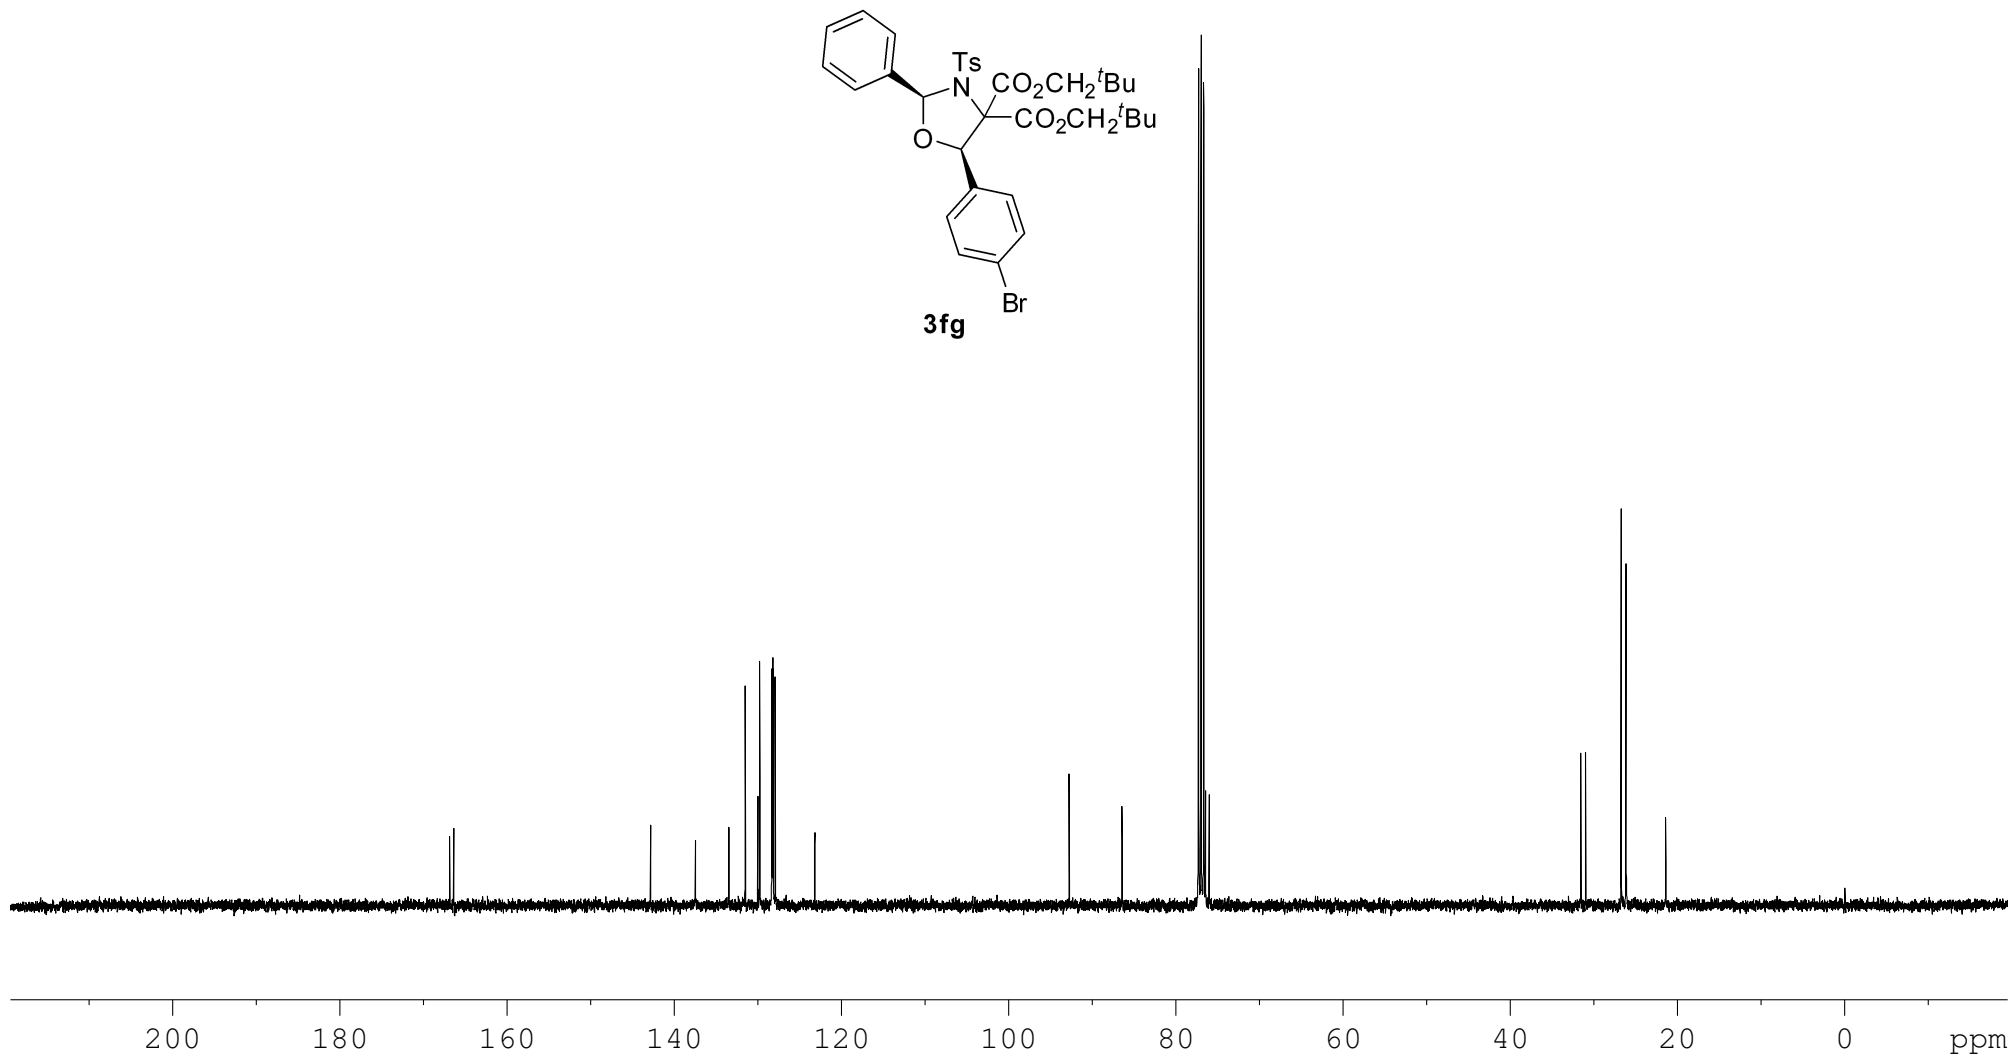

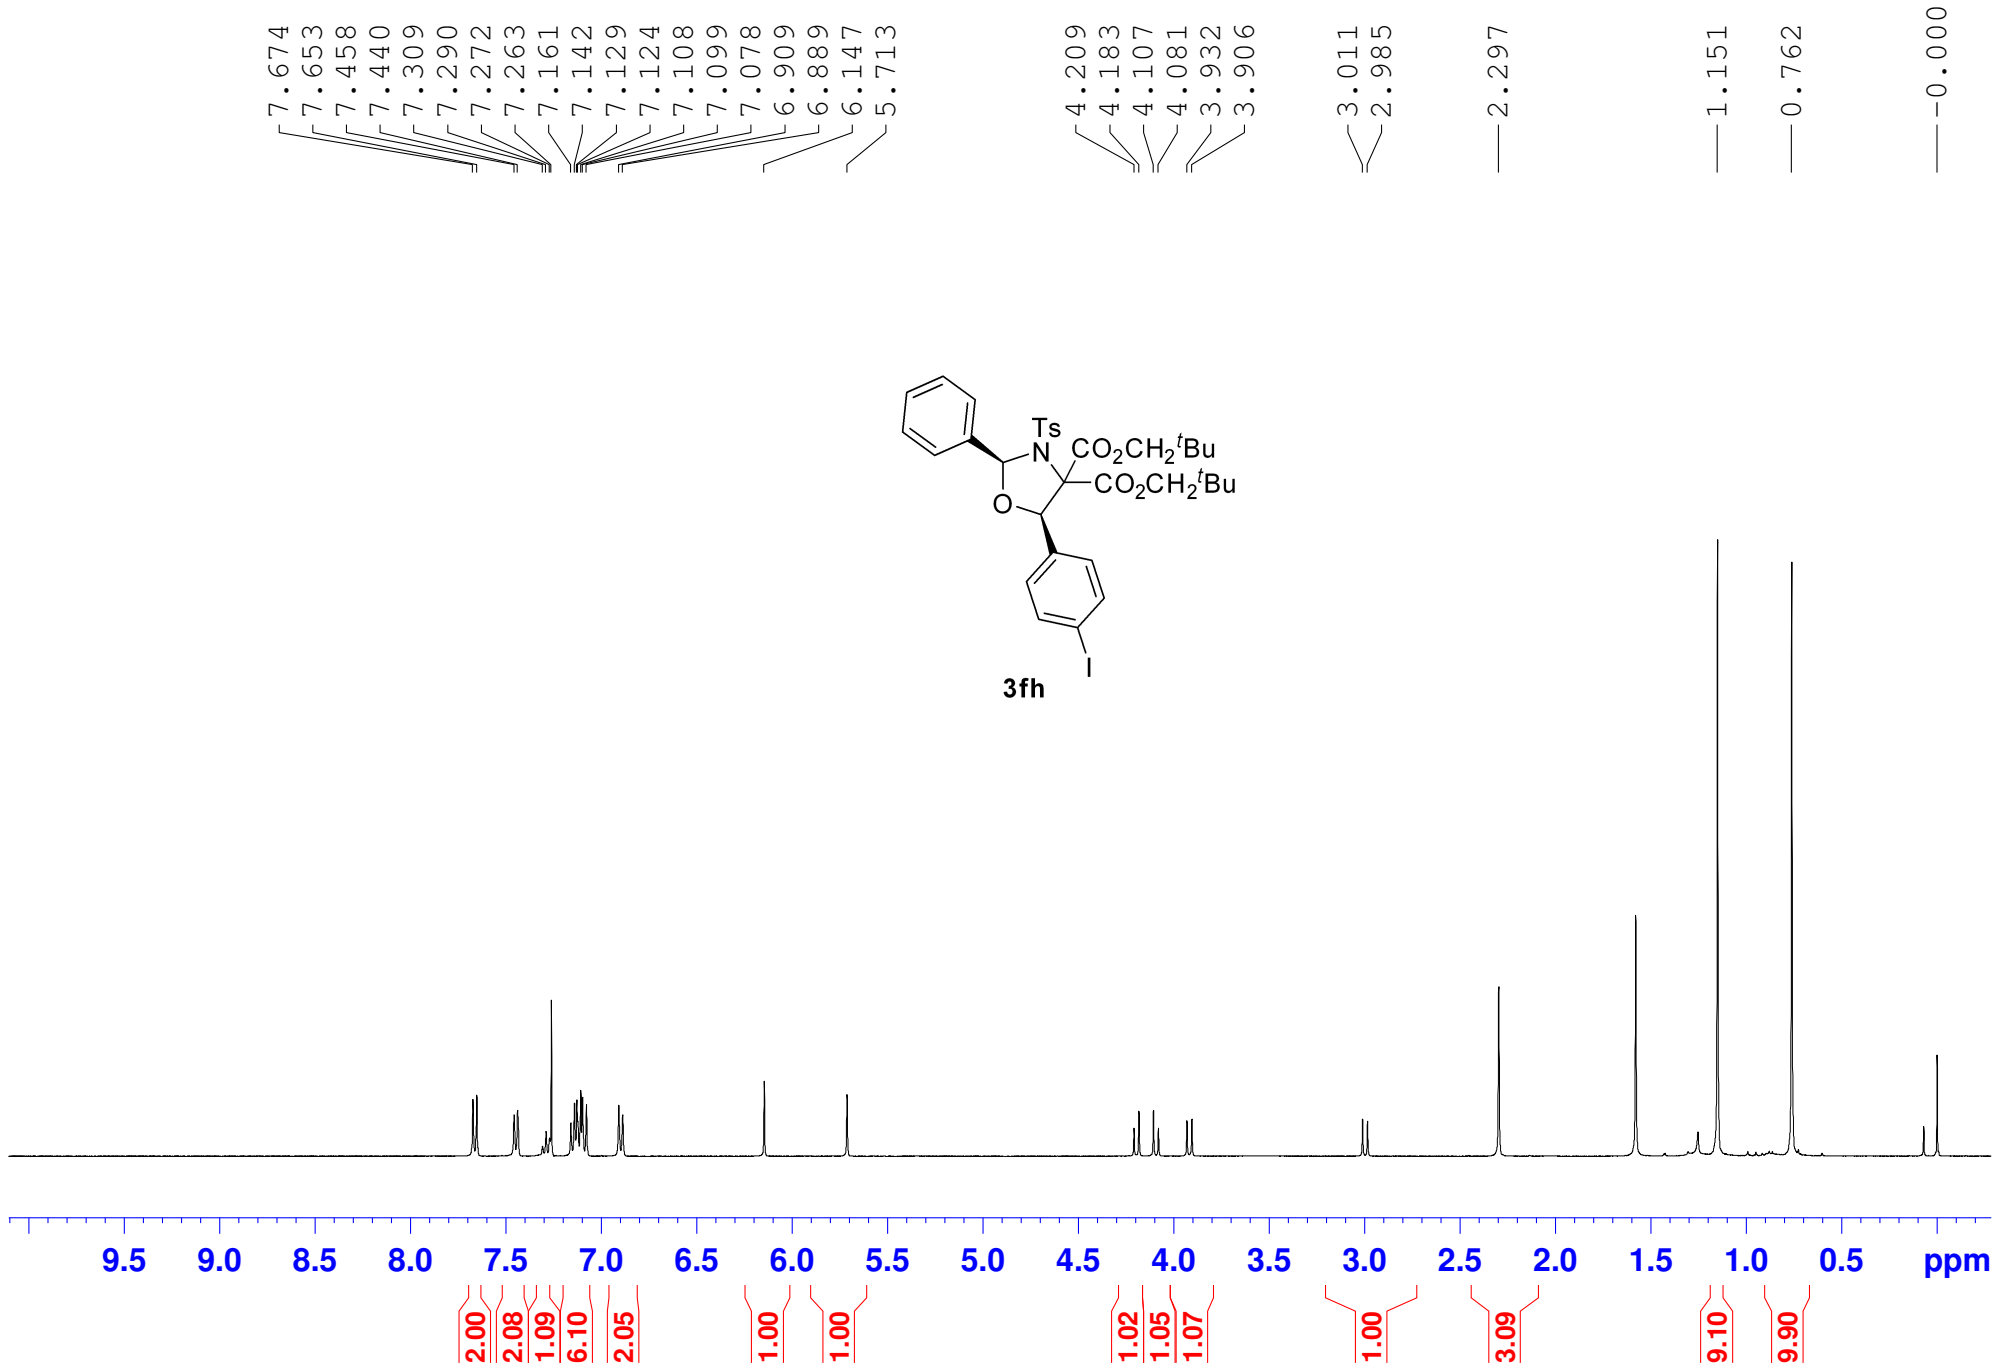

166.87  
166.41

142.84  
137.48  
134.19  
133.49  
130.01  
129.80  
129.01  
128.40  
128.35  
128.19  
127.94  
125.27

94.99  
92.80  
86.54  
77.31  
77.00  
76.68  
76.48  
76.05

31.58  
30.98  
26.75  
26.19  
21.41

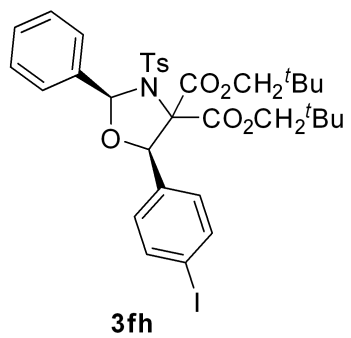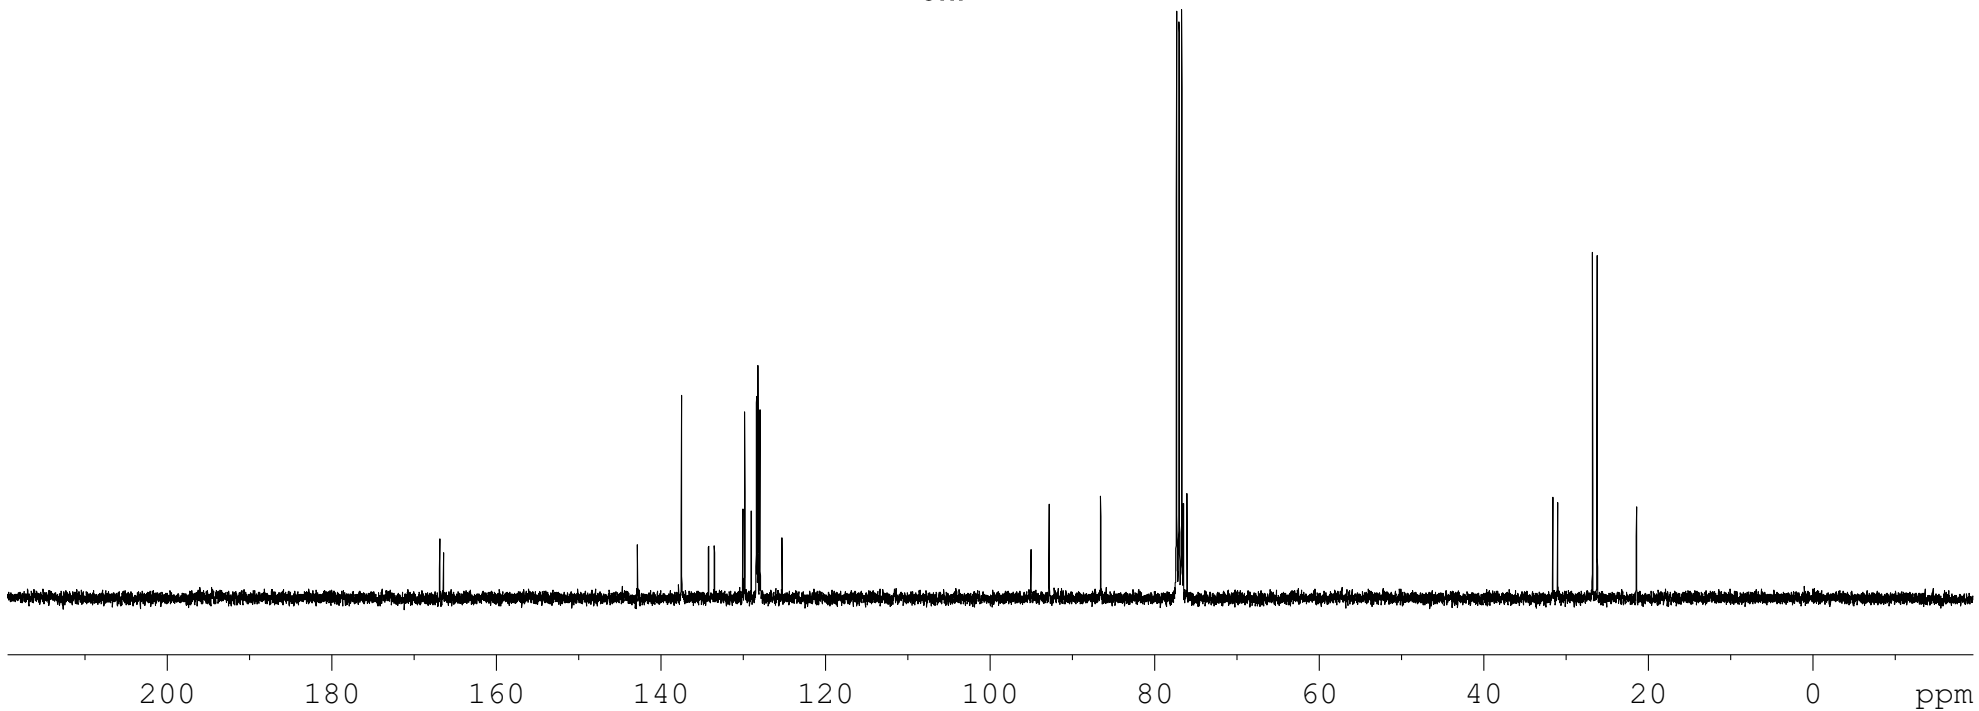

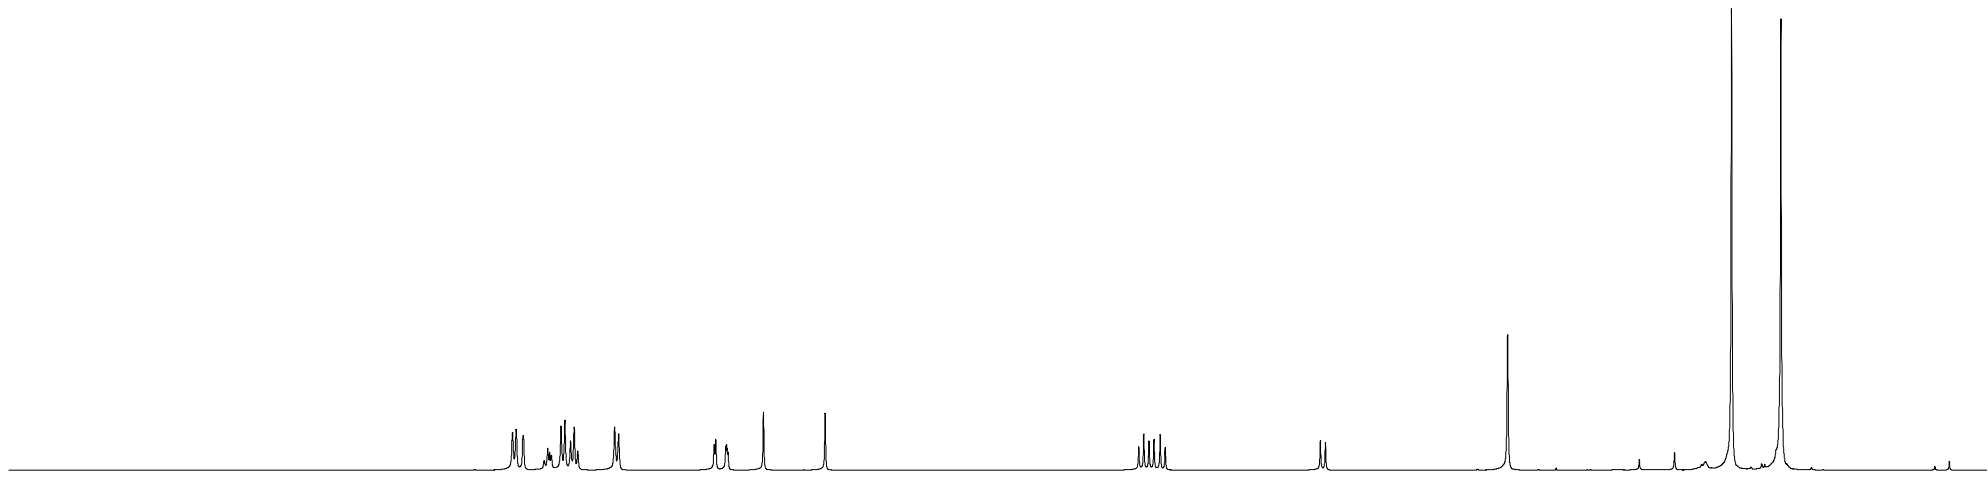

9.5 9.0 8.5 8.0 7.5 7.0 6.5 6.0 5.5 5.0 4.5 4.0 3.5 3.0 2.5 2.0 1.5 1.0 0.5 ppm

3.01 1.31 1.96 1.90 2.00 1.00 0.97 1.00 1.00 1.00 1.00 0.98 0.98 0.94 0.98 3.01 9.28 9.91

7.447 7.429 7.393 7.391 7.283 7.265 7.255 7.246 7.196 7.176 7.147 7.128 7.109 6.918 6.898 6.402 6.394 6.343 6.338 6.335 6.330 6.147 5.827 4.202 4.175 4.148 4.123 4.090 4.064 3.260 3.234 2.289 1.129 0.873 0.000

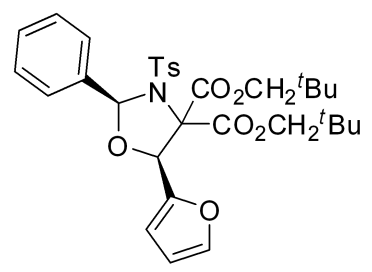

3fi

166.66  
166.18

147.70  
143.42  
142.84  
137.45  
133.78  
129.88  
129.75  
128.30  
127.86

110.56  
109.86

92.89  
81.29  
77.31  
77.20  
77.00  
76.68  
76.32  
76.19

31.57  
31.34  
26.66  
26.31  
21.39

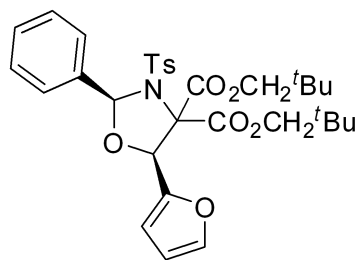

3fi

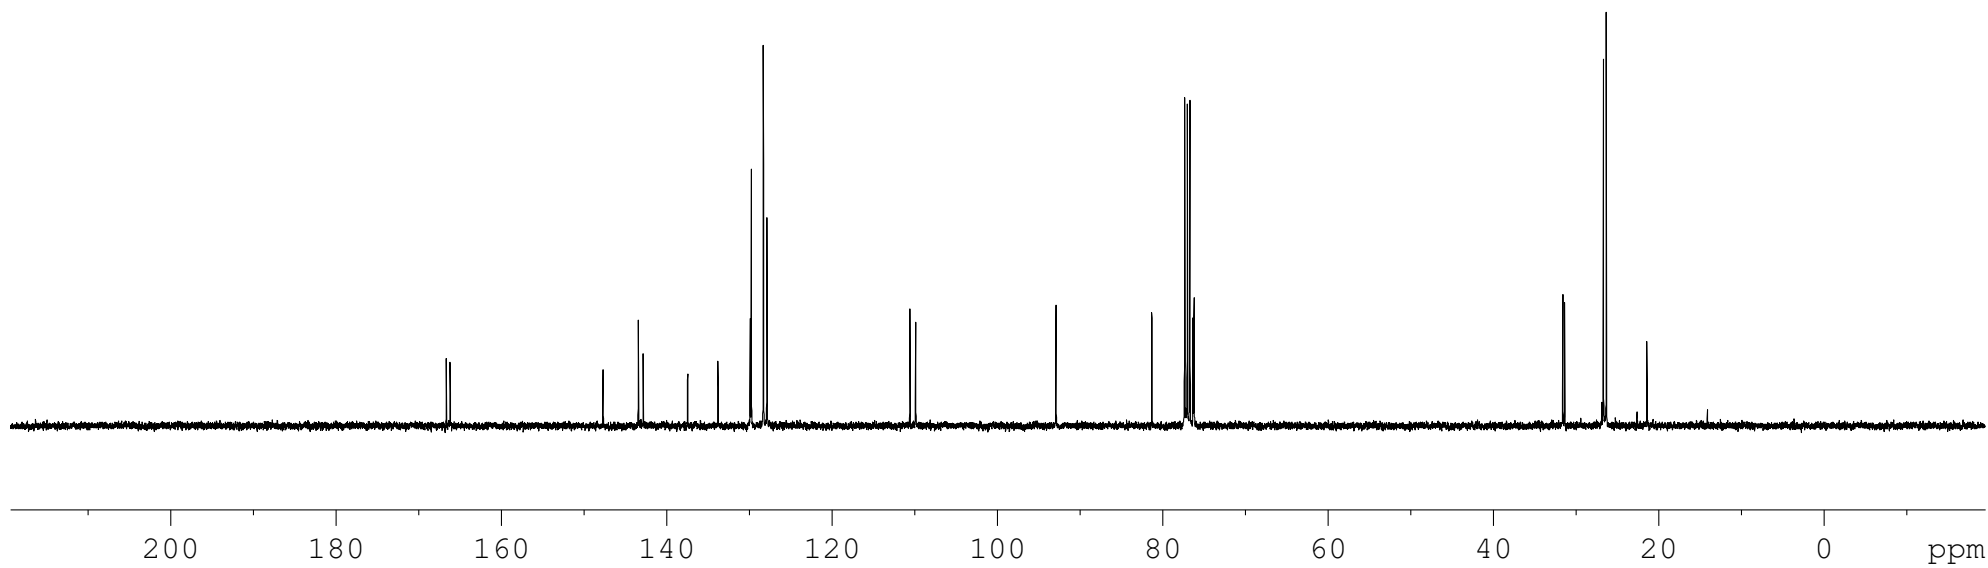

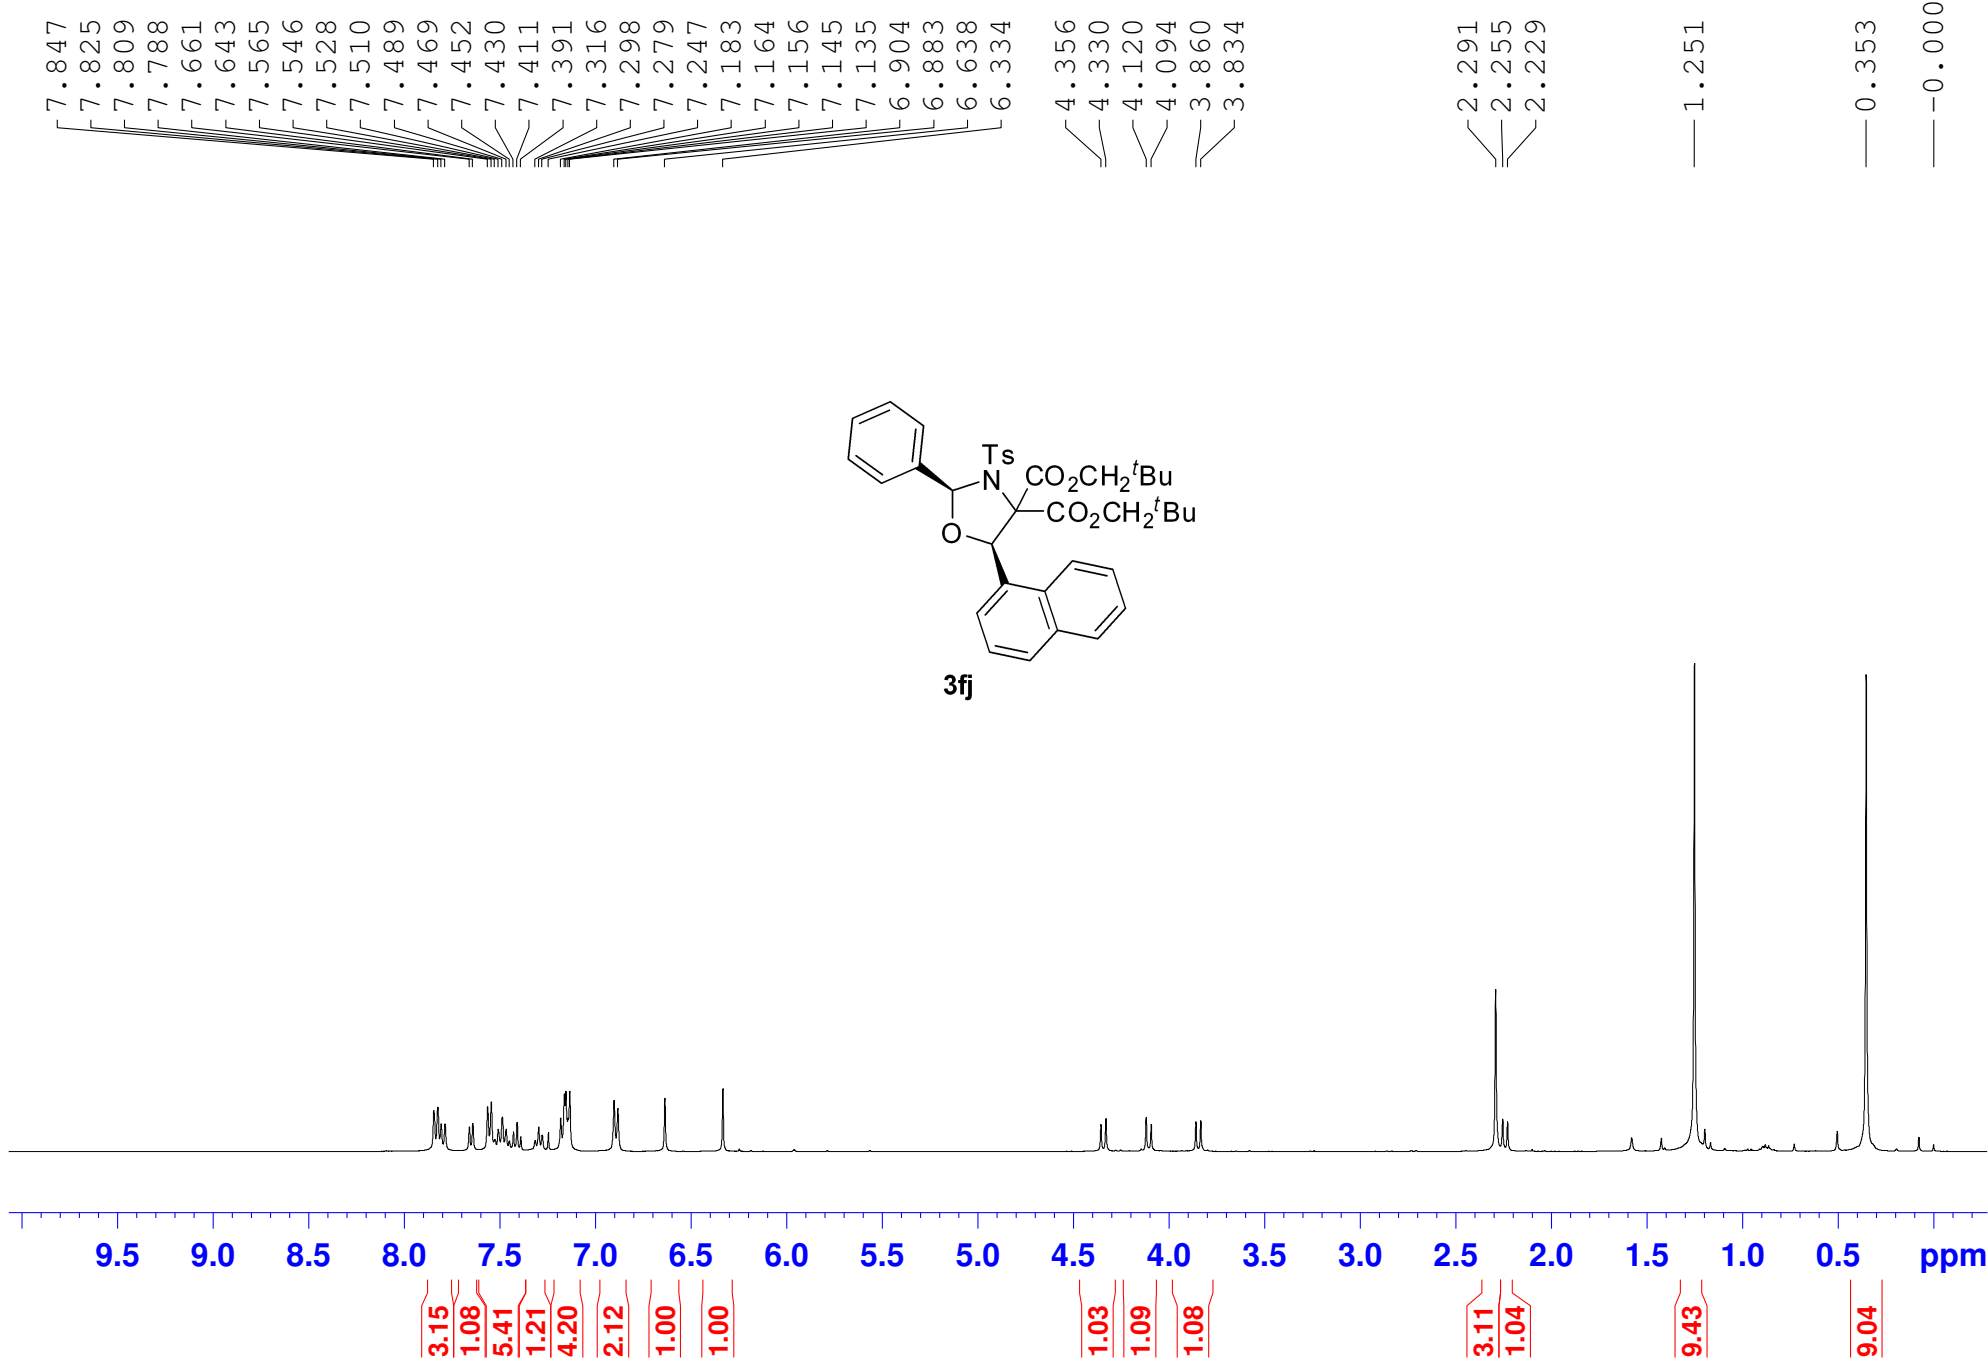

166.87  
166.63  
142.77  
137.53  
133.90  
133.66  
131.10  
131.05  
129.96  
129.91  
129.54  
128.91  
128.32  
128.21  
127.98  
126.66  
125.76  
125.13  
124.43  
122.41  
92.75  
84.08  
77.61  
77.32  
77.00  
76.82  
76.68  
75.57

31.50  
30.54  
26.93  
25.70  
21.40

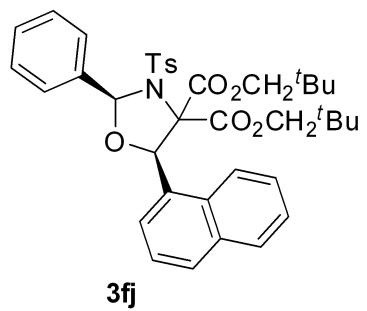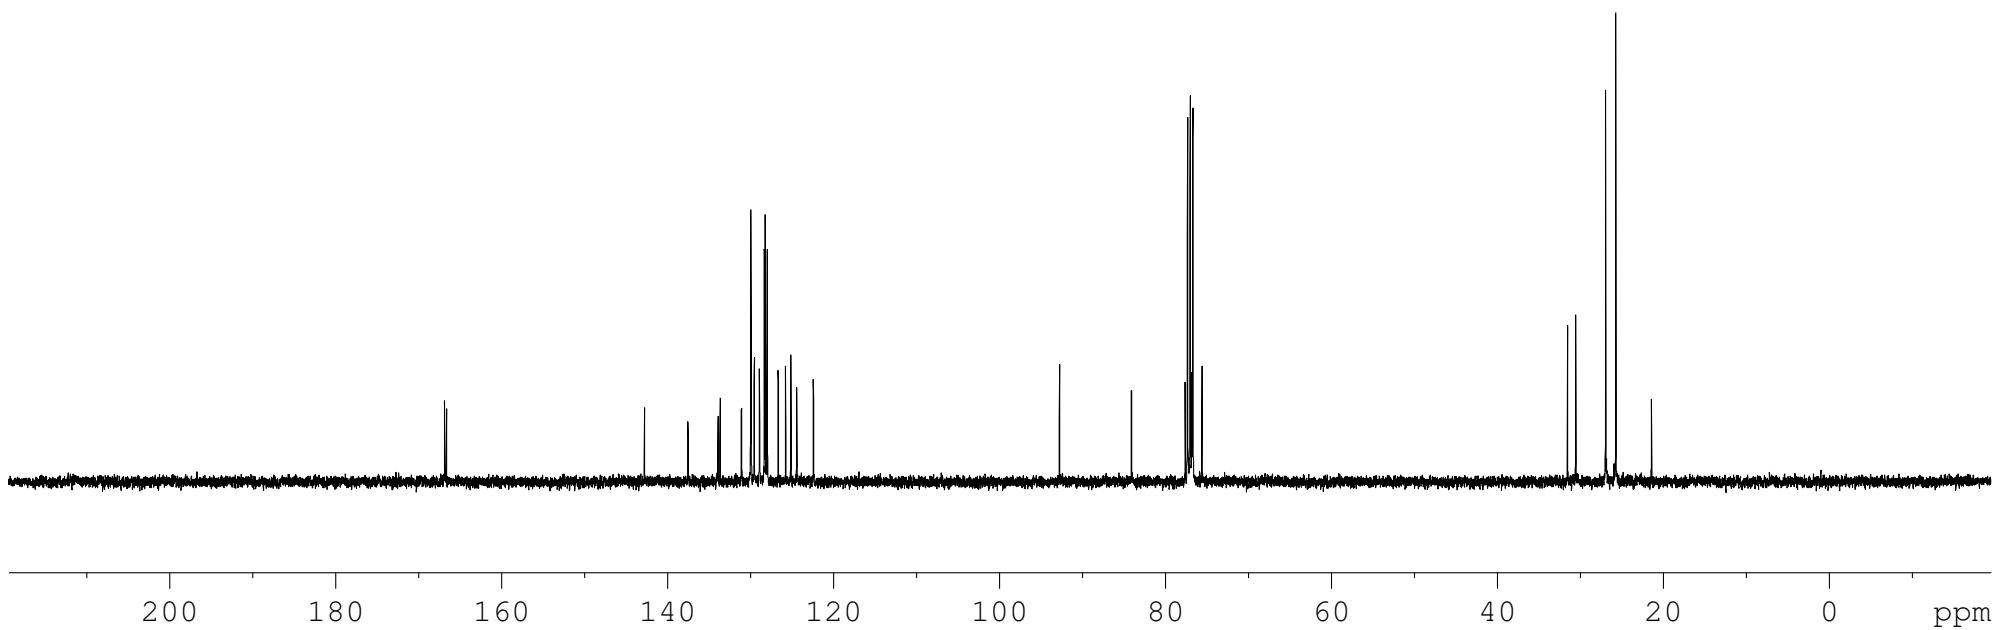



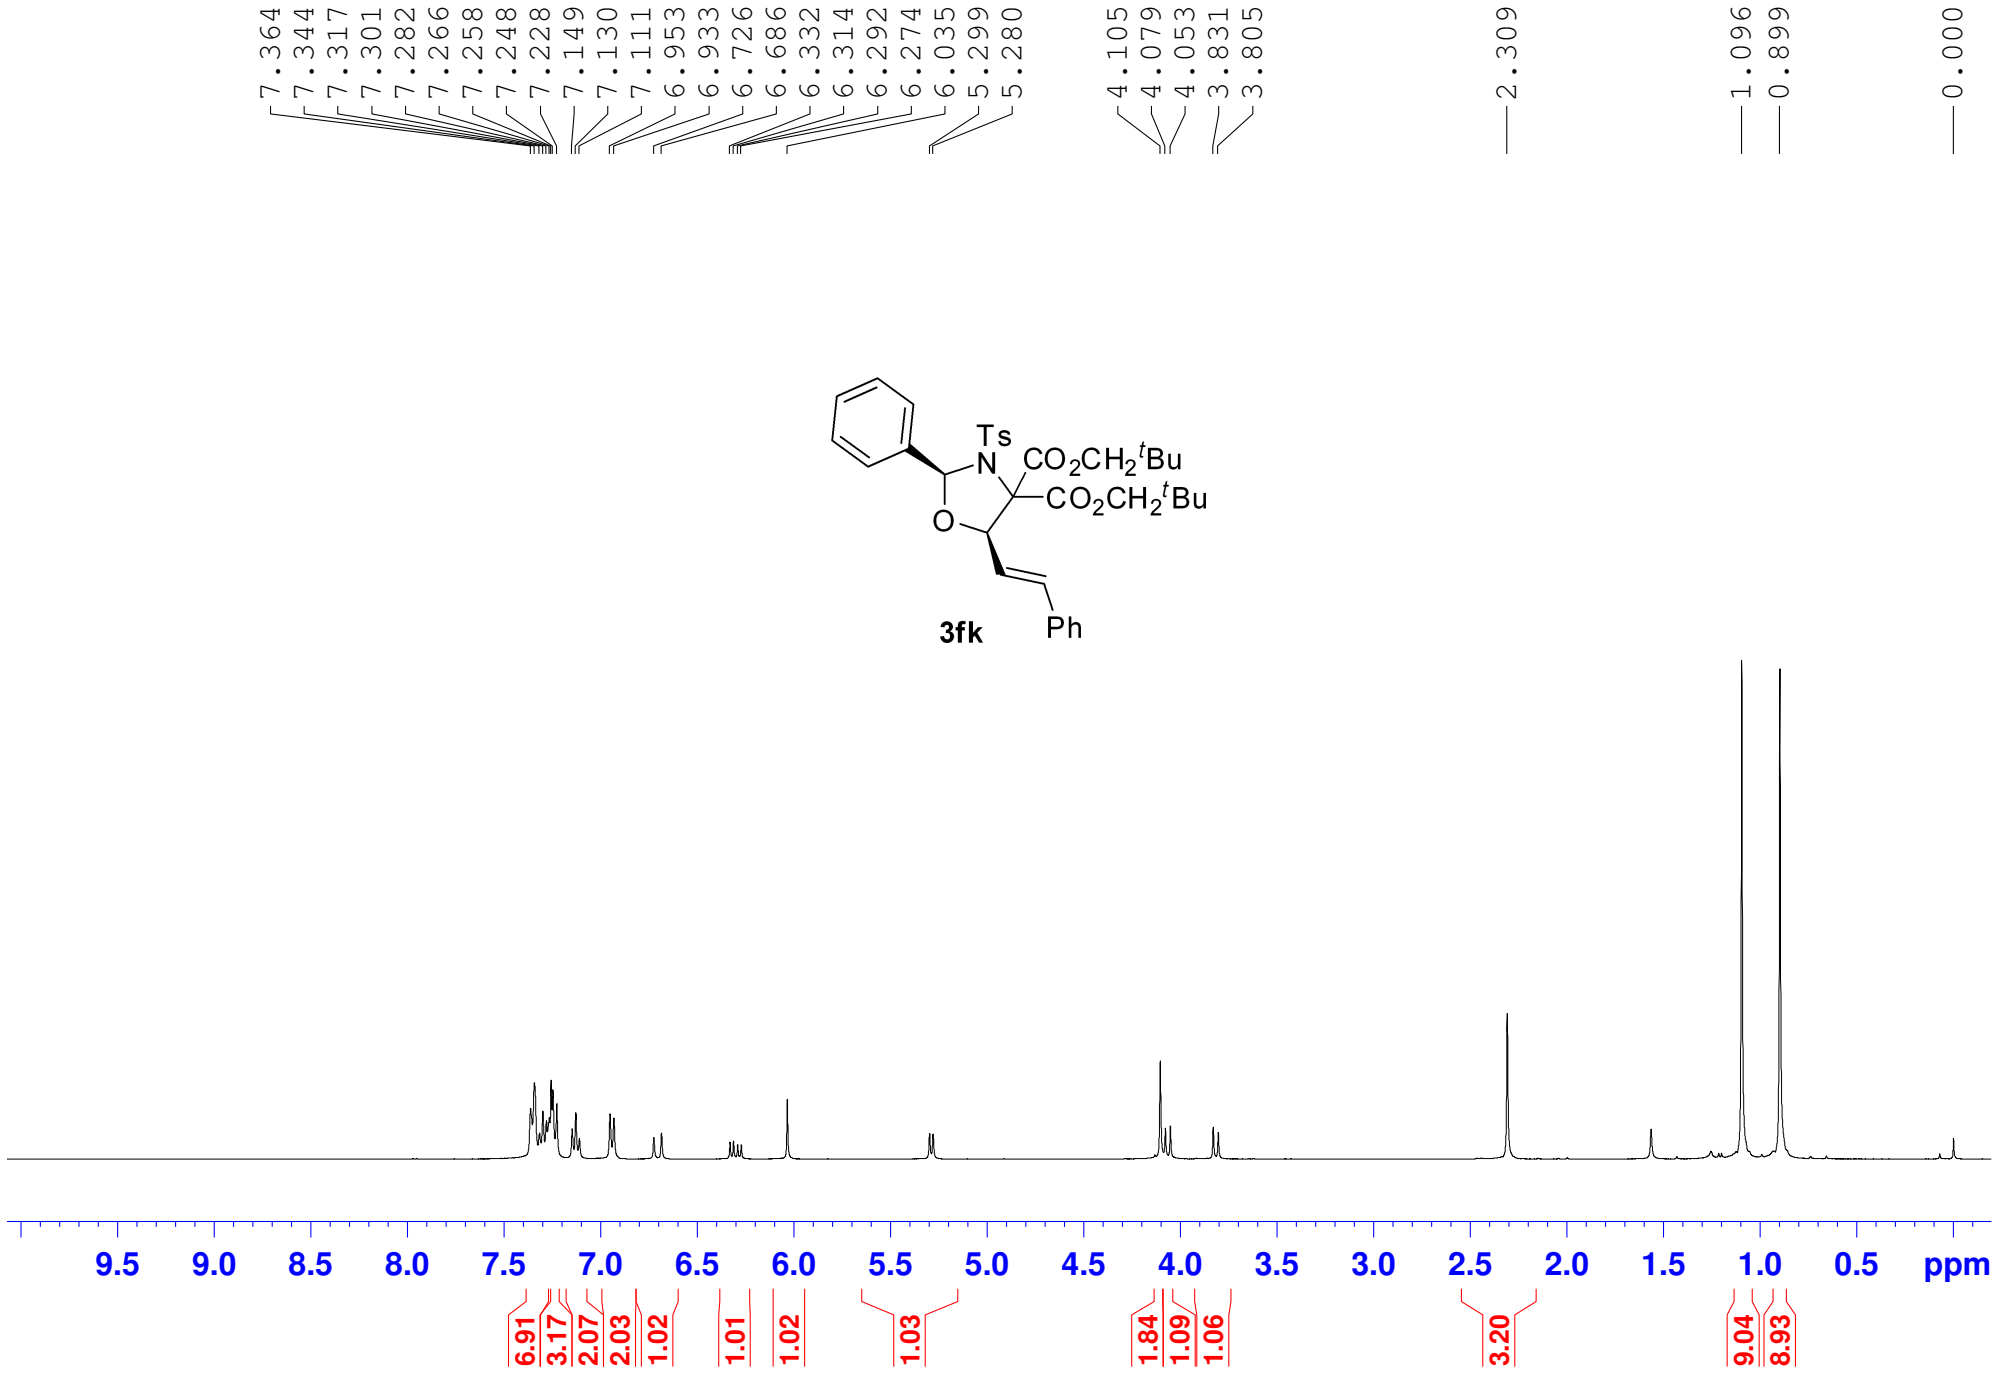

167.03  
166.67  
142.86  
137.51  
135.62  
134.86  
133.93  
129.84  
129.55  
128.50  
128.42  
128.39  
128.25  
127.88  
126.90  
122.04

92.85  
86.59  
77.32  
77.00  
76.83  
76.68  
76.34  
76.18

31.53  
31.36  
26.63  
26.42  
21.42

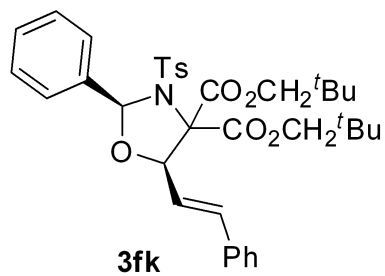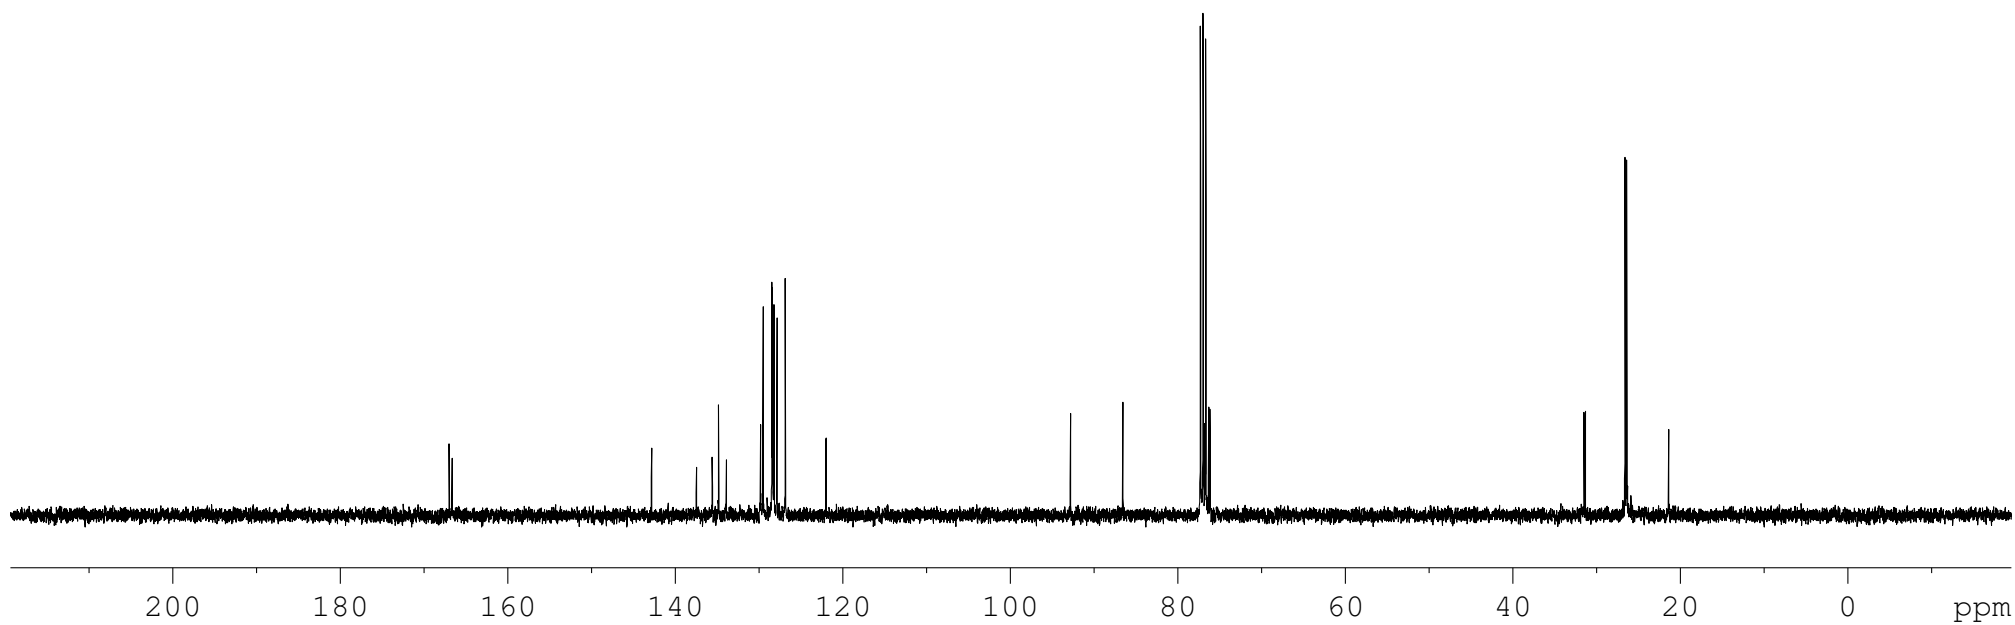

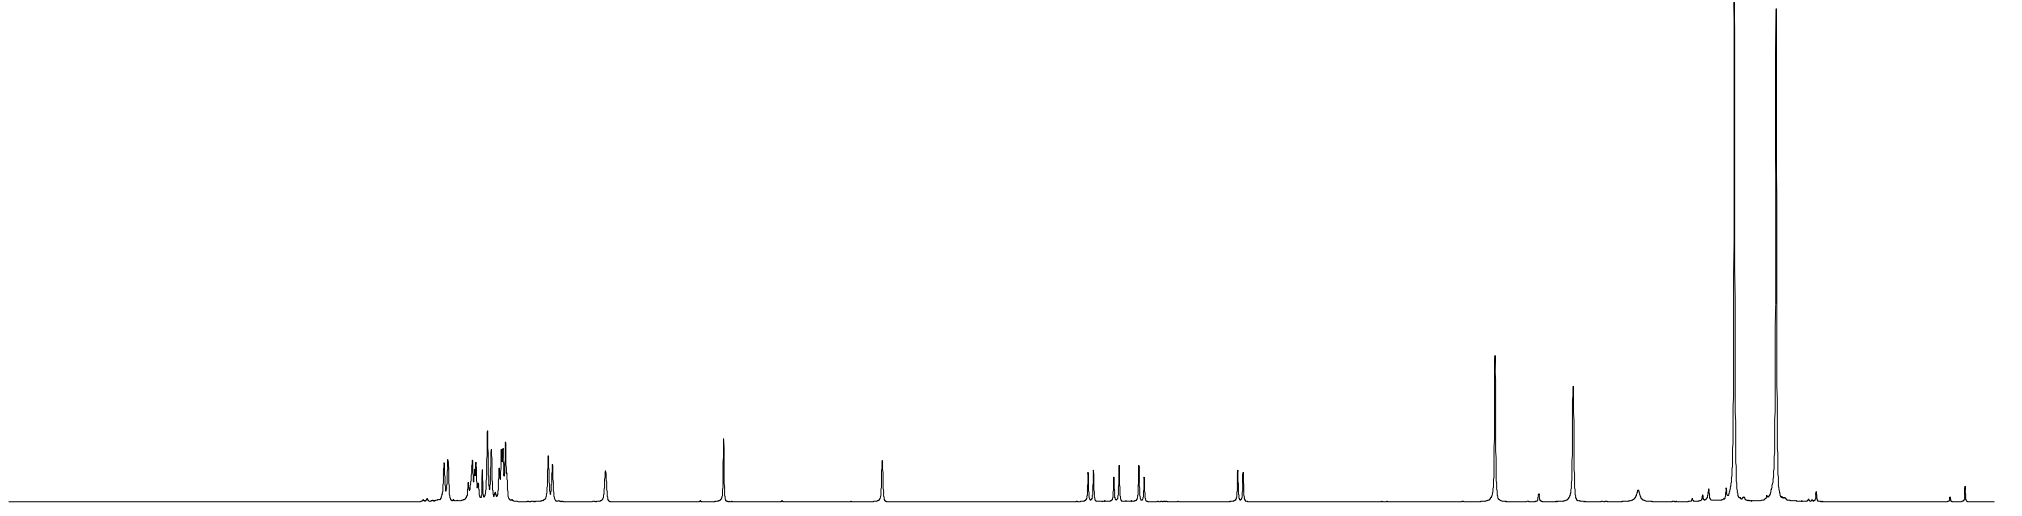

9.0 8.5 8.0 7.5 7.0 6.5 6.0 5.5 5.0 4.5 4.0 3.5 3.0 2.5 2.0 1.5 1.0 0.5 ppm

2.10 3.24 3.02 3.95 1.99 1.00 0.98 1.01 1.02 1.04 1.02 1.08 3.05 2.94 9.09 9.24

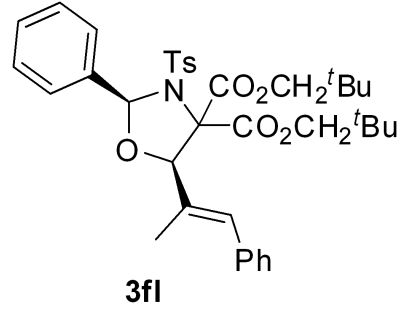

7.443 7.425 7.325 7.304 7.294 7.287 7.276 7.256 7.231 7.212 7.174 7.163 7.155 7.143 7.137 6.933 6.913 6.653 6.075  
 — 5.299  
 4.292 4.266 4.166 4.140 4.043 4.017 3.559 3.533  
 — 2.300  
 — 1.917  
 — 1.129  
 — 0.925  
 — 0.073  
 — 0.000

167.16  
166.79  
142.83  
137.41  
136.50  
133.97  
130.90  
129.91  
129.84  
128.99  
128.33  
128.24  
128.07  
127.90  
127.76  
126.89

92.55  
89.38  
77.32  
77.00  
76.68  
76.39  
76.09

31.53  
31.44  
26.71  
26.45  
21.42  
15.84

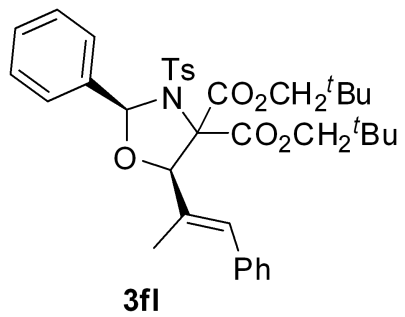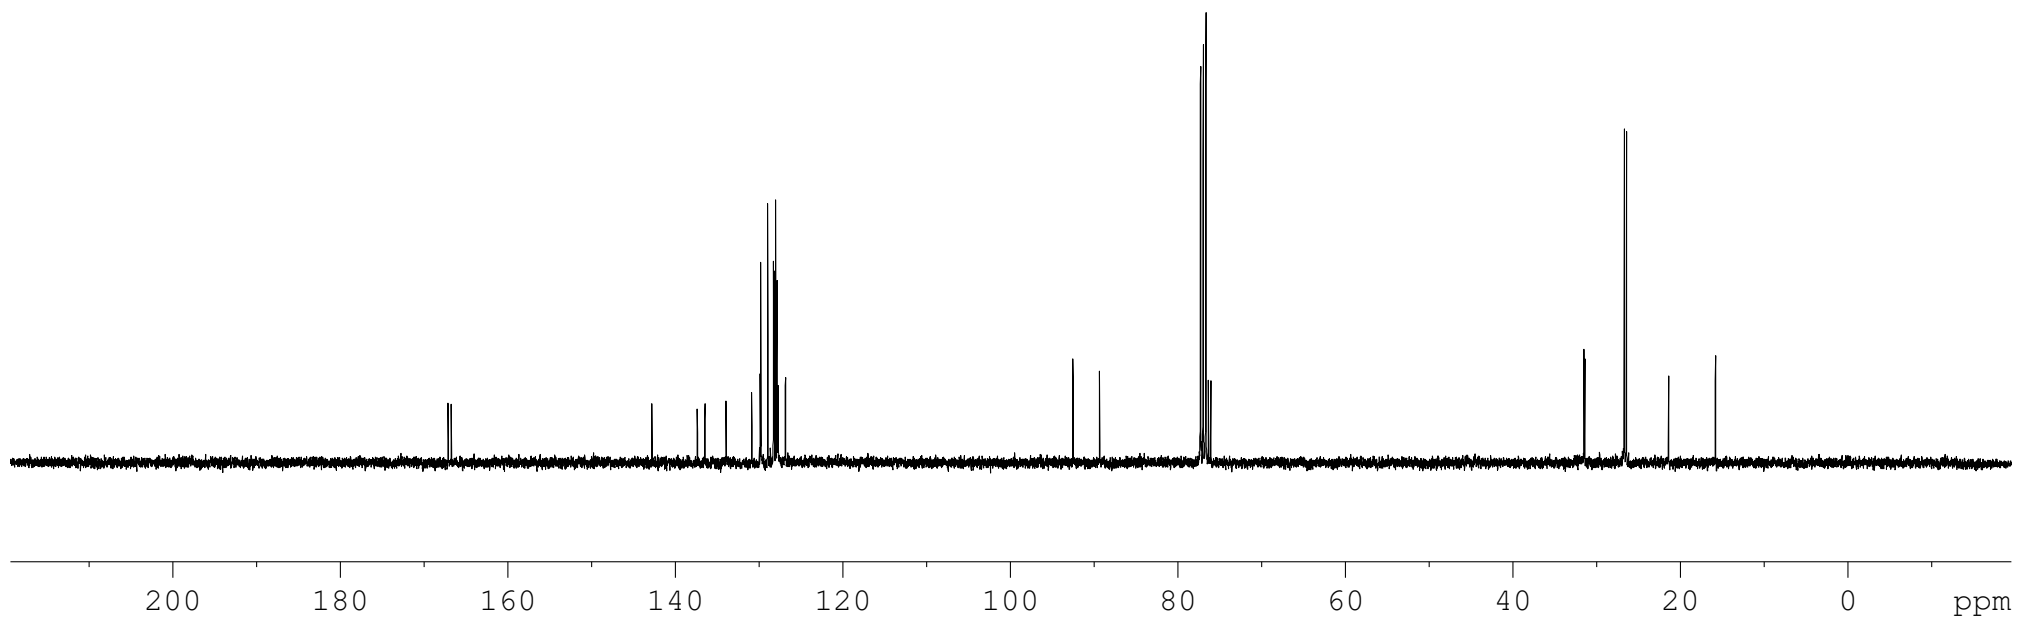

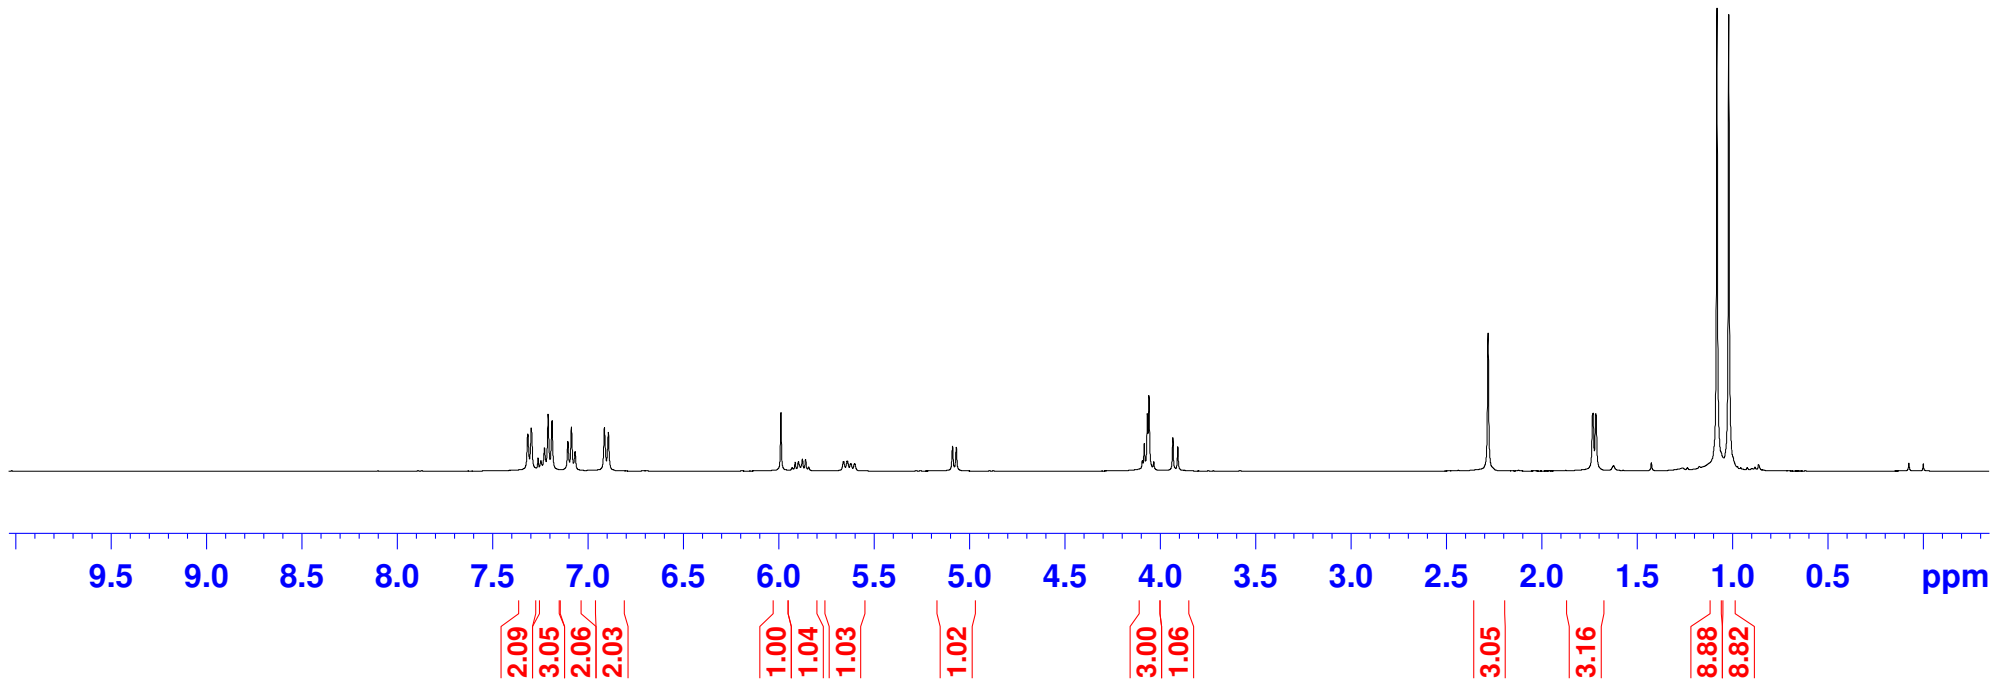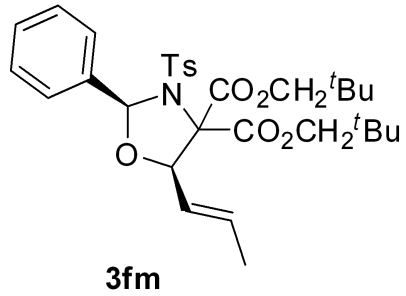

7.313  
7.295  
7.259  
7.244  
7.226  
7.207  
7.186  
7.103  
7.084  
7.065  
6.911  
6.891  
5.986  
5.928  
5.912  
5.895  
5.873  
5.857  
5.840  
5.660  
5.656  
5.640  
5.636  
5.621  
5.618  
5.601  
5.598  
5.087  
5.067  
4.094  
4.084  
4.068  
4.060  
4.034  
3.934  
3.908

— 2.282

1.733  
1.732  
1.717

1.082  
1.020

0.075  
0.000

166.93  
166.84

142.68  
137.61  
133.96  
132.92  
129.68  
129.52  
128.28  
128.21  
127.78  
124.44

92.65  
86.91  
77.32  
77.00  
76.68  
76.56  
76.15

31.46  
31.35  
26.60  
26.53  
21.35  
17.90

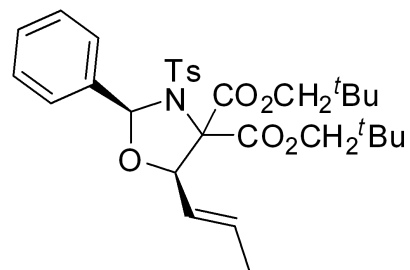

3fm

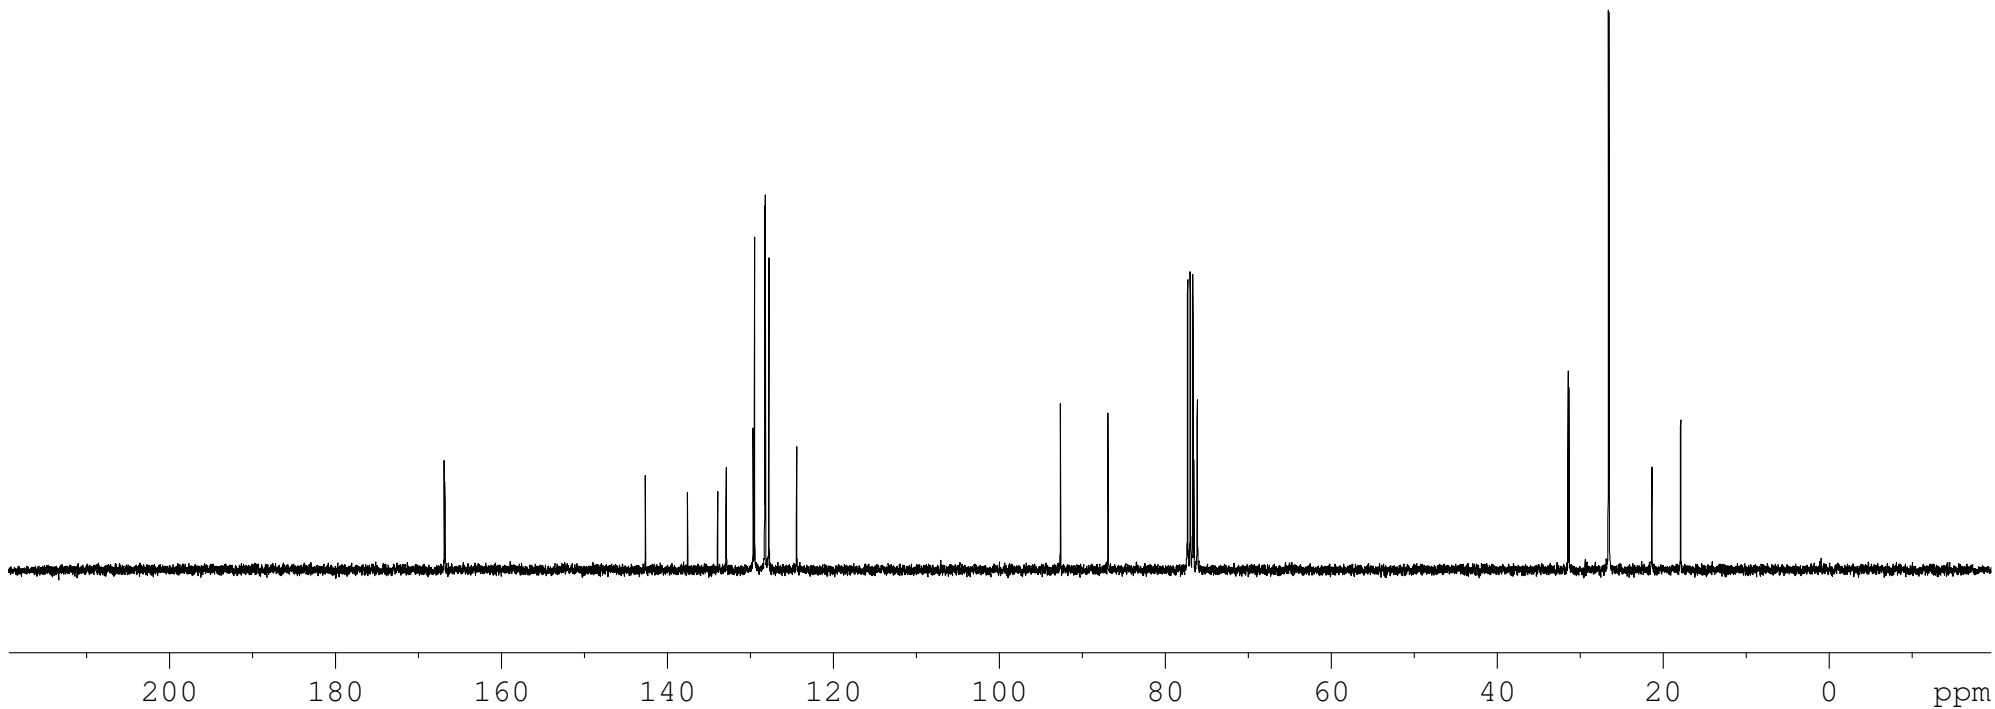

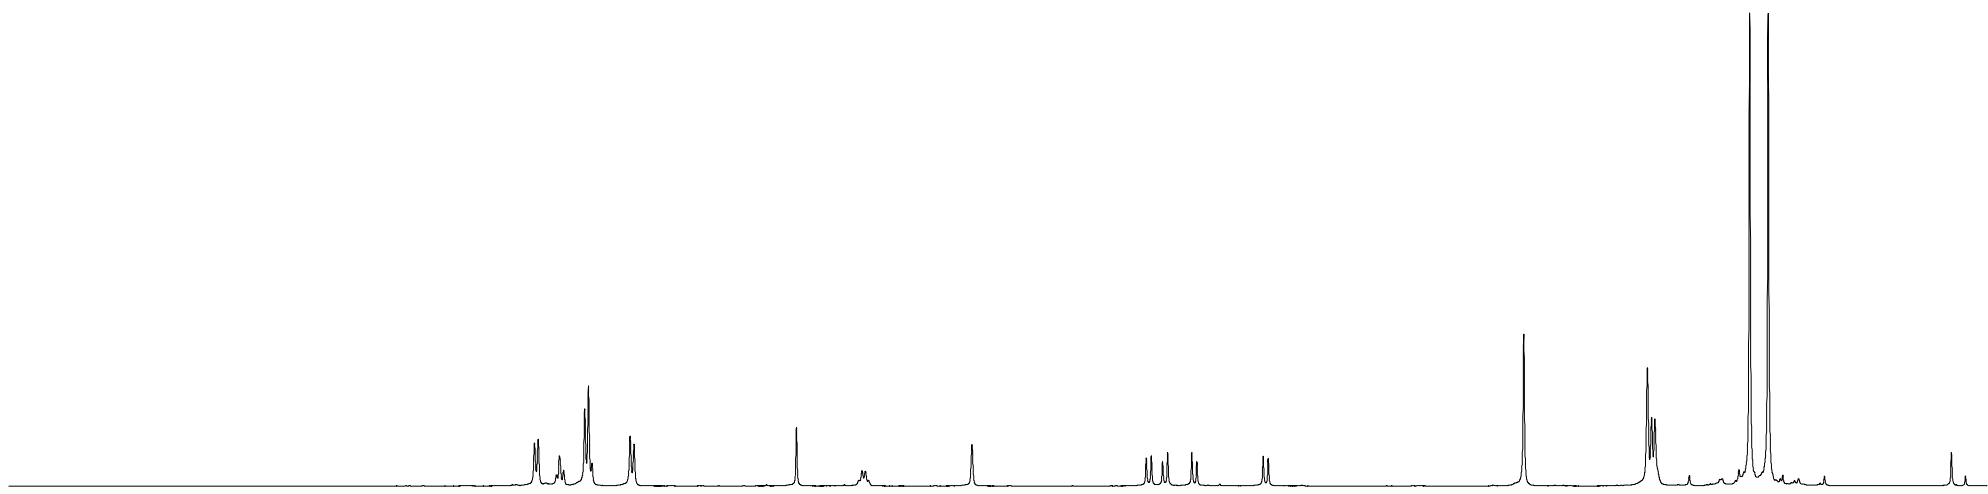

9.5 9.0 8.5 8.0 7.5 7.0 6.5 6.0 5.5 5.0 4.5 4.0 3.5 3.0 2.5 2.0 1.5 1.0 0.5 ppm

2.01 1.18 4.13 2.11 1.00 1.03 1.01 1.09 1.01 1.05 1.02 3.16 2.97 3.25 8.89 8.96

7.387 7.368 7.273 7.258 7.237 7.128 7.108 7.090 6.894 6.873 6.035 5.712 5.696 5.680 5.664 5.129 4.229 4.203 4.145 4.119 3.994 3.968 3.626 3.599 2.280 1.642 1.621 1.603 1.114 1.019 0.073

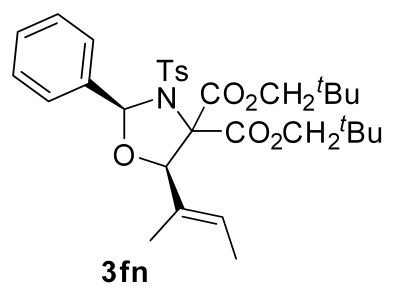

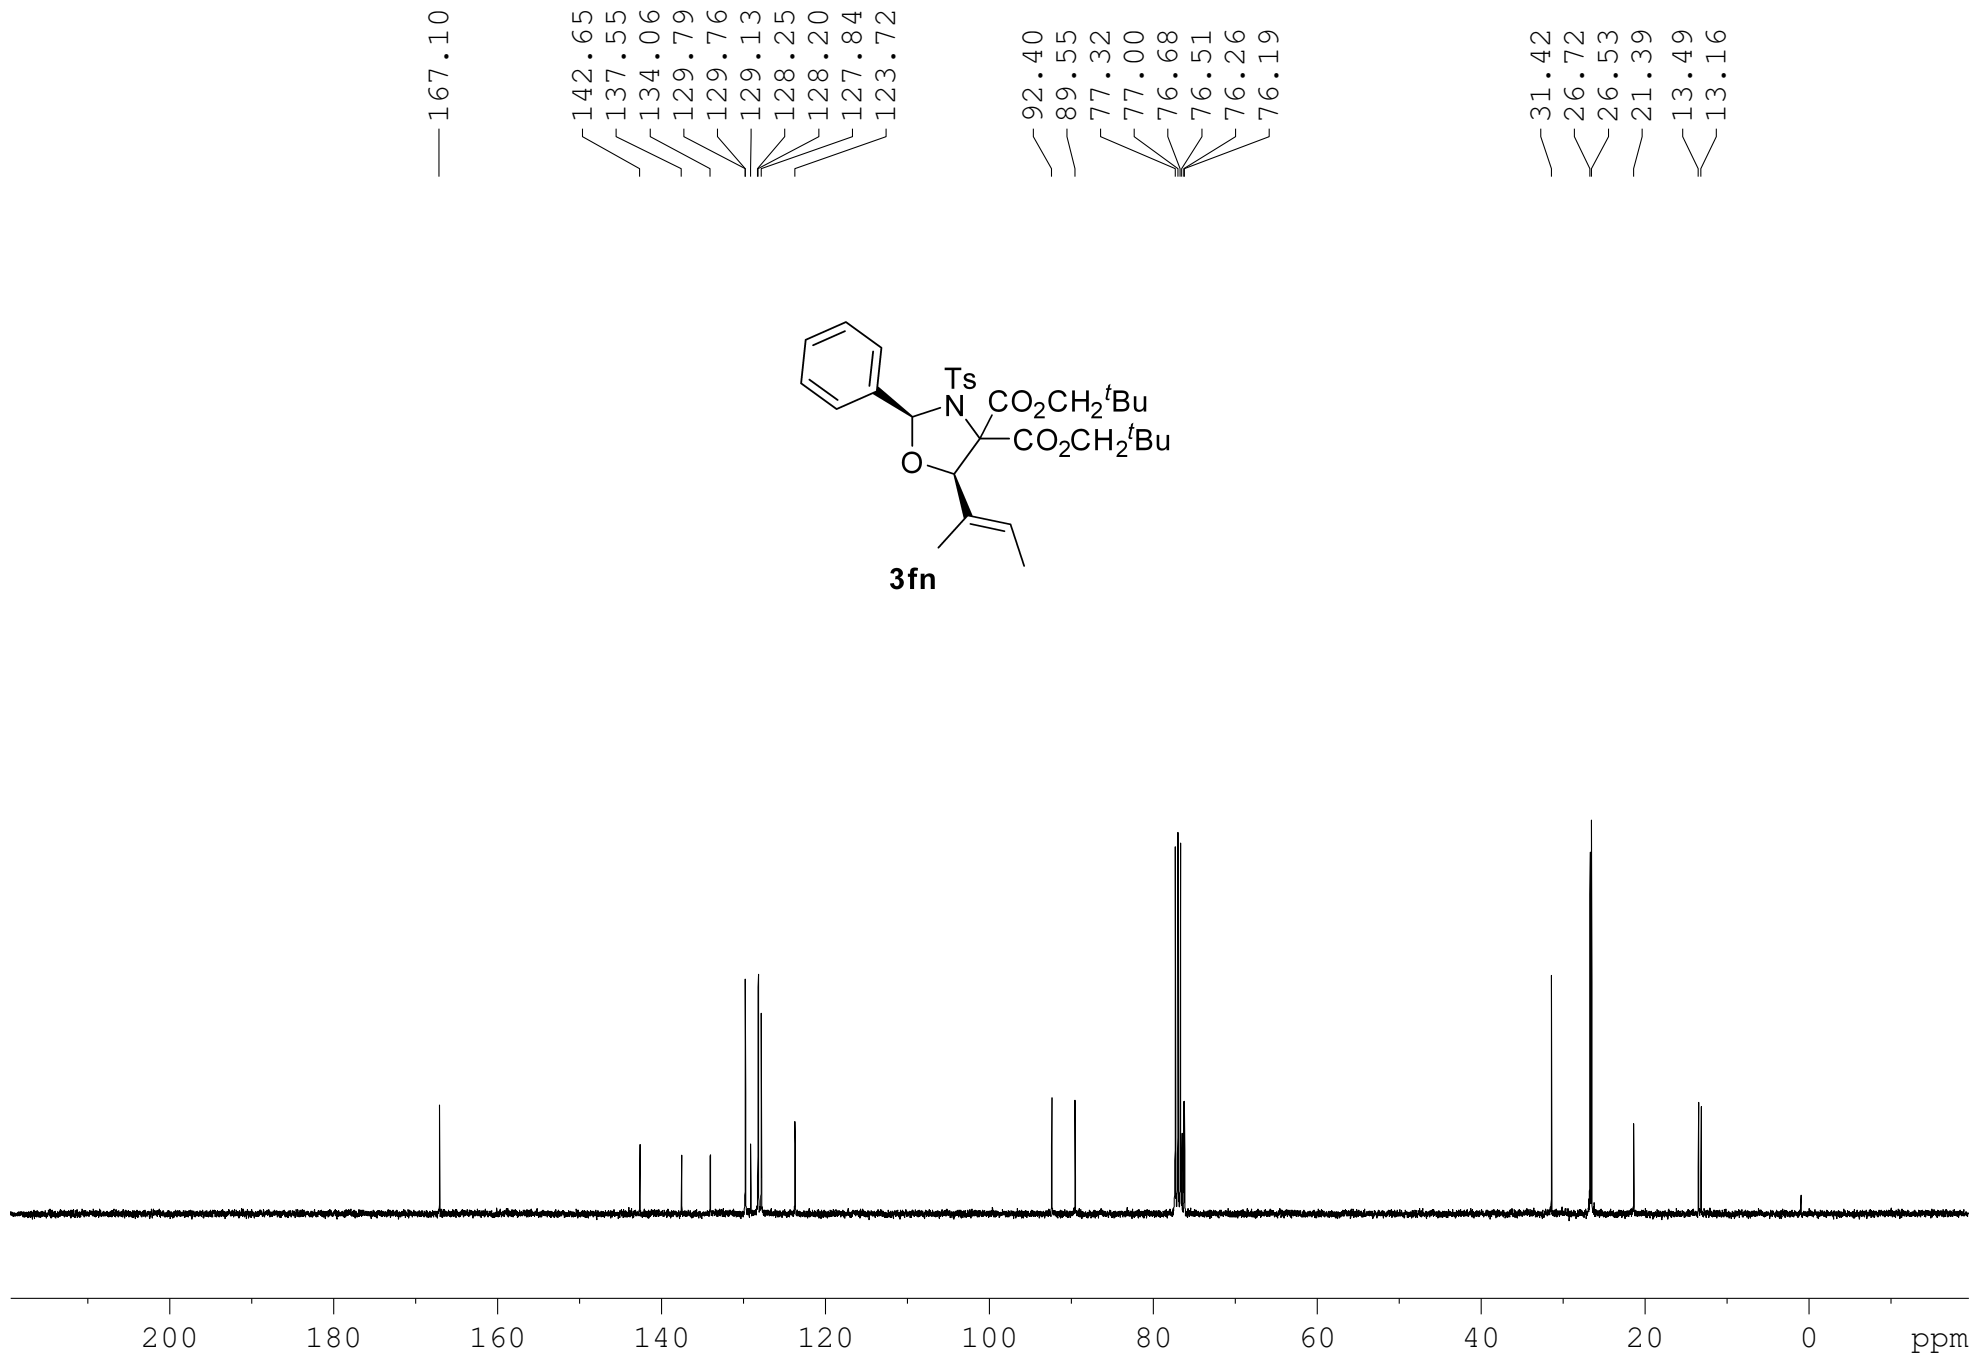



7.403  
7.385  
7.383  
7.285  
7.267  
7.261  
7.248  
7.141  
7.122  
7.105  
7.085  
6.907  
6.886  
6.007  
5.880

5.064

4.413  
4.387  
4.121  
4.095  
4.015  
3.989  
3.584  
3.558

2.287  
2.126  
2.082  
2.008  
1.903  
1.860  
1.641  
1.625  
1.613  
1.587  
1.578  
1.573  
1.563  
1.549  
1.534  
1.519  
1.108  
1.041  
-0.000

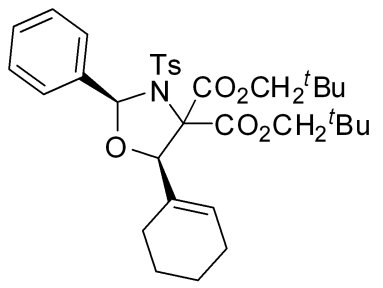

3fo

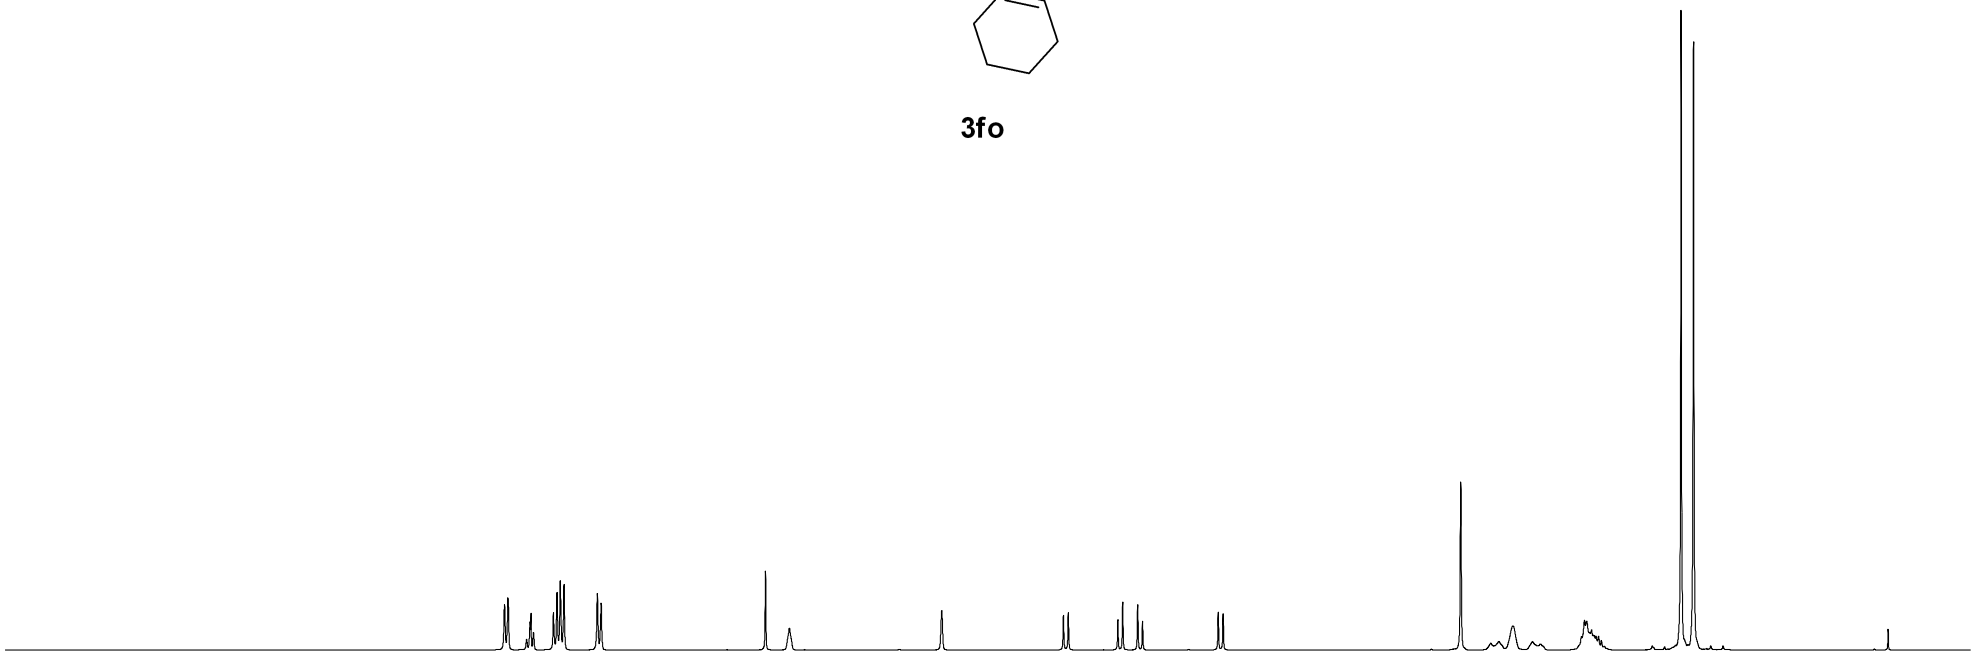

9.5 9.0 8.5 8.0 7.5 7.0 6.5 6.0 5.5 5.0 4.5 4.0 3.5 3.0 2.5 2.0 1.5 1.0 0.5 ppm

2.04  
1.20  
3.97  
2.00

1.00  
1.00

0.99

1.00  
1.00  
0.99  
1.04

2.96  
4.03  
4.34

8.82  
9.01

167.19  
166.68

142.66  
137.51  
133.99  
131.37  
129.79  
128.25  
128.13  
127.80  
125.87

92.30  
88.37  
77.31  
77.00  
76.68  
76.38  
76.10  
75.58

31.83  
31.43  
26.68  
26.47  
25.61  
24.78  
22.21  
21.98  
21.39

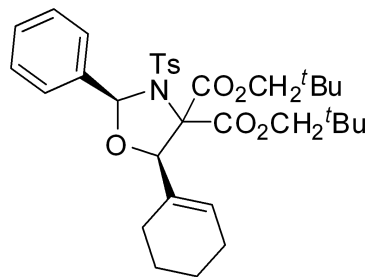

3fo

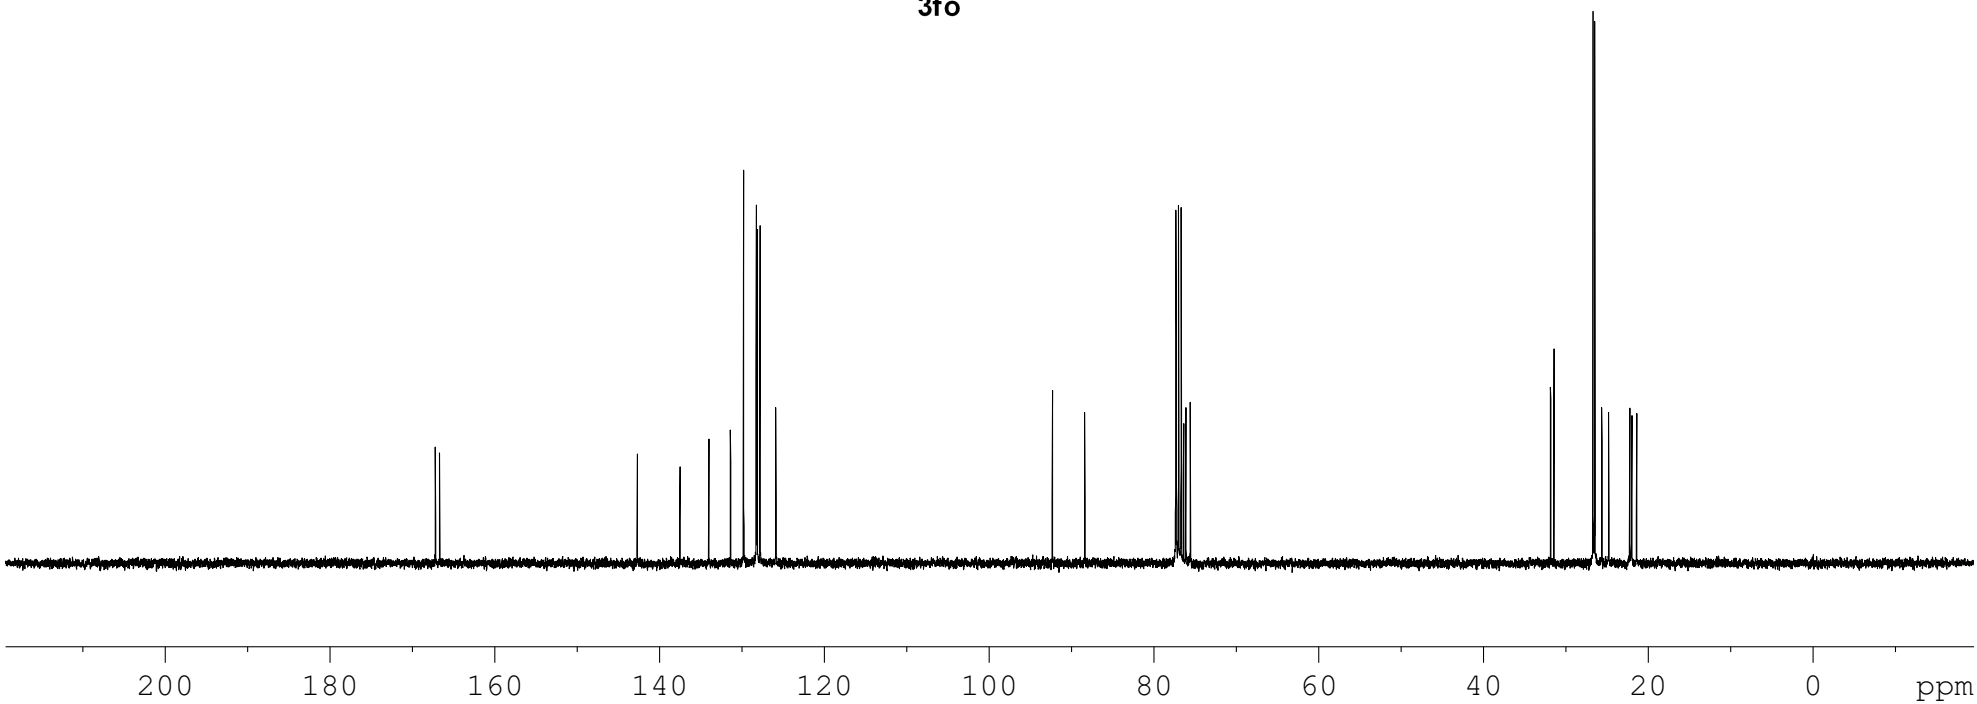

Supplement: c7cc02906c1.pdf [file c7cc02906c1.pdf]
